# Supplementary material for: H(N3)dap (Hdap = 2,6-diaminopurine) Recognition by Cu<sub>2</sub>(EGTA): Structure, Physical Properties and DFT-Calculations of [Cu<sub>4</sub>(μ-EGTA)<sub>2</sub>(μ-H(N3)dap)<sub>2</sub>(H<sub>2</sub>O)<sub>2</sub>]·7H<sub>2</sub>O
Source: Preprints.org preprint supplement (doi:10.20944/preprints202308.0975.v1), 2023-08-14

## checkCIF/PLATON report

Structure factors have been supplied for datablock(s) 22jnac984

THIS REPORT IS FOR GUIDANCE ONLY. IF USED AS PART OF A REVIEW PROCEDURE FOR PUBLICATION, IT SHOULD NOT REPLACE THE EXPERTISE OF AN EXPERIENCED CRYSTALLOGRAPHIC REFEREE.

No syntax errors found.      CIF dictionary      Interpreting this report

### Datablock: 22jnac984

---

|                        |                                    |                                       |
|------------------------|------------------------------------|---------------------------------------|
| Bond precision:        | C-C = 0.0044 Å                     | Wavelength=1.54178                    |
| Cell:                  | a=12.9272 (4)                      | b=13.1727 (4)      c=19.6298 (6)      |
|                        | alpha=104.372 (1)                  | beta=94.015 (2)      gamma=95.213 (2) |
| Temperature:           | 298 K                              |                                       |
|                        | Calculated                         | Reported                              |
| Volume                 | 3209.80 (17)                       | 3209.80 (17)                          |
| Space group            | P -1                               | P -1                                  |
| Hall group             | -P 1                               | -P 1                                  |
| Moiety formula         | C38 H56 Cu4 N16 O22 [+<br>solvent] | C38 H56 Cu4 N16 O22, 7[H2O]           |
| Sum formula            | C38 H56 Cu4 N16 O22 [+<br>solvent] | C38 H70 Cu4 N16 O29                   |
| Mr                     | 1343.19                            | 1469.24                               |
| Dx, g cm <sup>-3</sup> | 1.390                              | 1.520                                 |
| Z                      | 2                                  | 2                                     |
| Mu (mm <sup>-1</sup> ) | 2.168                              | 2.396                                 |
| F000                   | 1376.0                             | 1516.0                                |
| F000'                  | 1364.46                            |                                       |
| h, k, lmax             | 15, 15, 23                         | 15, 15, 23                            |
| Nref                   | 11344                              | 10915                                 |
| Tmin, Tmax             | 0.787, 0.806                       | 0.714, 1.000                          |
| Tmin'                  | 0.787                              |                                       |

Correction method= # Reported T Limits: Tmin=0.714 Tmax=1.000

AbsCorr = MULTI-SCAN

Data completeness= 0.962

Theta(max)= 66.591

R(reflections)= 0.0354( 9698)

wR2(reflections)=  
0.0986( 10915)

S = 1.038

Npar= 742

The following ALERTS were generated. Each ALERT has the format

**test-name\_ALERT\_alert-type\_alert-level.**

Click on the hyperlinks for more details of the test.

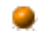

### Alert level B

PLAT420\_ALERT\_2\_B D-H Bond Without Acceptor O62 --H62A . Please Check

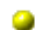

### Alert level C

ABSMU01\_ALERT\_1\_C The ratio of given/expected absorption coefficient lies  
outside the range 0.99 <> 1.01

Calculated value of mu = 2.301

Value of mu given = 2.396

|                   |                                                  |           |                                 |                     |       |              |
|-------------------|--------------------------------------------------|-----------|---------------------------------|---------------------|-------|--------------|
| PLAT029_ALERT_3_C | _diffrn_measured_fraction_theta_full             | value     | Low                             | .                   | 0.962 | Why?         |
| PLAT220_ALERT_2_C | NonSolvent                                       | Resd 1    | C                               | Ueq(max)/Ueq(min)   | Range | 3.3 Ratio    |
| PLAT220_ALERT_2_C | NonSolvent                                       | Resd 1    | N                               | Ueq(max)/Ueq(min)   | Range | 5.3 Ratio    |
| PLAT220_ALERT_2_C | NonSolvent                                       | Resd 1    | O                               | Ueq(max)/Ueq(min)   | Range | 3.3 Ratio    |
| PLAT222_ALERT_3_C | NonSolvent                                       | Resd 1    | H                               | Uiso(max)/Uiso(min) | Range | 5.4 Ratio    |
| PLAT241_ALERT_2_C | High                                             | 'MainMol' | Ueq as Compared to Neighbors of |                     | C6    | Check        |
| PLAT420_ALERT_2_C | D-H Bond Without Acceptor                        | N32       | --H32A                          | .                   |       | Please Check |
| PLAT420_ALERT_2_C | D-H Bond Without Acceptor                        | N32       | --H32B                          | .                   |       | Please Check |
| PLAT420_ALERT_2_C | D-H Bond Without Acceptor                        | N72       | --H72B                          | .                   |       | Please Check |
| PLAT420_ALERT_2_C | D-H Bond Without Acceptor                        | N76       | --H76A                          | .                   |       | Please Check |
| PLAT911_ALERT_3_C | Missing FCF Refl Between Thmin & STh/L=          | 0.595     |                                 |                     | 429   | Report       |
| PLAT913_ALERT_3_C | Missing # of Very Strong Reflections in FCF .... |           |                                 |                     | 10    | Note         |
| PLAT934_ALERT_3_C | Number of (Iobs-Icalc)/Sigma(W) > 10 Outliers .. |           |                                 |                     | 1     | Check        |

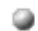

### Alert level G

FORMU01\_ALERT\_2\_G There is a discrepancy between the atom counts in the  
\_chemical\_formula\_sum and the formula from the \_atom\_site\* data.

Atom count from \_chemical\_formula\_sum: C38 H70 Cu4 N16 O29

Atom count from the \_atom\_site data: C38 H56 Cu4 N16 O22

CELLZ01\_ALERT\_1\_G Difference between formula and atom\_site contents detected.

CELLZ01\_ALERT\_1\_G ALERT: Large difference may be due to a

symmetry error - see SYMMG tests

From the CIF: \_cell\_formula\_units\_Z 2

From the CIF: \_chemical\_formula\_sum C38 H70 Cu4 N16 O29

TEST: Compare cell contents of formula and atom\_site data

| atom | Z*formula | cif sites | diff  |
|------|-----------|-----------|-------|
| C    | 76.00     | 76.00     | 0.00  |
| H    | 140.00    | 112.00    | 28.00 |
| Cu   | 8.00      | 8.00      | 0.00  |
| N    | 32.00     | 32.00     | 0.00  |
| O    | 58.00     | 44.00     | 14.00 |

|                   |                                                  |      |              |
|-------------------|--------------------------------------------------|------|--------------|
| PLAT002_ALERT_2_G | Number of Distance or Angle Restraints on AtSite | 4    | Note         |
| PLAT007_ALERT_5_G | Number of Unrefined Donor-H Atoms .....          | 14   | Report       |
| PLAT041_ALERT_1_G | Calc. and Reported SumFormula Strings Differ     |      | Please Check |
| PLAT051_ALERT_1_G | Mu(calc) and Mu(CIF) Ratio Differs from 1.0 by . | 9.53 | %            |

|                   |                                                  |           |             |
|-------------------|--------------------------------------------------|-----------|-------------|
| PLAT176_ALERT_4_G | The CIF-Embedded .res File Contains SADI Records |           | 1 Report    |
| PLAT232_ALERT_2_G | Hirshfeld Test Diff (M-X) Cu1                    | --O12 .   | 6.5 s.u.    |
| PLAT232_ALERT_2_G | Hirshfeld Test Diff (M-X) Cu2                    | --O51 .   | 6.6 s.u.    |
| PLAT232_ALERT_2_G | Hirshfeld Test Diff (M-X) Cu3                    | --O54 .   | 5.9 s.u.    |
| PLAT232_ALERT_2_G | Hirshfeld Test Diff (M-X) Cu3                    | --O60 .   | 5.4 s.u.    |
| PLAT232_ALERT_2_G | Hirshfeld Test Diff (M-X) Cu3                    | --O62 .   | 19.9 s.u.   |
| PLAT232_ALERT_2_G | Hirshfeld Test Diff (M-X) Cu4                    | --O15 .   | 6.9 s.u.    |
| PLAT232_ALERT_2_G | Hirshfeld Test Diff (M-X) Cu4                    | --N18 .   | 5.5 s.u.    |
| PLAT301_ALERT_3_G | Main Residue Disorder .....                      | (Resd 1 ) | 3% Note     |
| PLAT410_ALERT_2_G | Short Intra H...H Contact H46A                   | ..H49A .  | 2.07 Ang.   |
|                   |                                                  | x,y,z =   | 1_555 Check |
| PLAT410_ALERT_2_G | Short Intra H...H Contact H52B                   | ..H50B .  | 1.95 Ang.   |
|                   |                                                  | x,y,z =   | 1_555 Check |
| PLAT606_ALERT_4_G | Solvent Accessible VOID(S) in Structure .....    |           | ! Info      |
| PLAT794_ALERT_5_G | Tentative Bond Valency for Cu1                   | (II) .    | 2.26 Info   |
| PLAT794_ALERT_5_G | Tentative Bond Valency for Cu3                   | (II) .    | 2.27 Info   |
| PLAT794_ALERT_5_G | Tentative Bond Valency for Cu4                   | (II) .    | 2.17 Info   |
| PLAT860_ALERT_3_G | Number of Least-Squares Restraints .....         |           | 1 Note      |
| PLAT868_ALERT_4_G | ALERTS Due to the Use of _smtbx_masks Suppressed |           | ! Info      |
| PLAT883_ALERT_1_G | No Info/Value for _atom_sites_solution_primary . |           | Please Do ! |
| PLAT909_ALERT_3_G | Percentage of I>2sig(I) Data at Theta(Max) Still |           | 79% Note    |
| PLAT941_ALERT_3_G | Average HKL Measurement Multiplicity .....       |           | 2.1 Low     |
| PLAT978_ALERT_2_G | Number C-C Bonds with Positive Residual Density. |           | 3 Info      |

- 
- 0 **ALERT level A** = Most likely a serious problem - resolve or explain  
 1 **ALERT level B** = A potentially serious problem, consider carefully  
 14 **ALERT level C** = Check. Ensure it is not caused by an omission or oversight  
 28 **ALERT level G** = General information/check it is not something unexpected
- 6 ALERT type 1 CIF construction/syntax error, inconsistent or missing data  
 21 ALERT type 2 Indicator that the structure model may be wrong or deficient  
 9 ALERT type 3 Indicator that the structure quality may be low  
 3 ALERT type 4 Improvement, methodology, query or suggestion  
 4 ALERT type 5 Informative message, check
-

It is advisable to attempt to resolve as many as possible of the alerts in all categories. Often the minor alerts point to easily fixed oversights, errors and omissions in your CIF or refinement strategy, so attention to these fine details can be worthwhile. In order to resolve some of the more serious problems it may be necessary to carry out additional measurements or structure refinements. However, the purpose of your study may justify the reported deviations and the more serious of these should normally be commented upon in the discussion or experimental section of a paper or in the "special\_details" fields of the CIF. checkCIF was carefully designed to identify outliers and unusual parameters, but every test has its limitations and alerts that are not important in a particular case may appear. Conversely, the absence of alerts does not guarantee there are no aspects of the results needing attention. It is up to the individual to critically assess their own results and, if necessary, seek expert advice.

### **Publication of your CIF in IUCr journals**

A basic structural check has been run on your CIF. These basic checks will be run on all CIFs submitted for publication in IUCr journals (*Acta Crystallographica*, *Journal of Applied Crystallography*, *Journal of Synchrotron Radiation*); however, if you intend to submit to *Acta Crystallographica Section C* or *E* or *IUCrData*, you should make sure that full publication checks are run on the final version of your CIF prior to submission.

### **Publication of your CIF in other journals**

Please refer to the *Notes for Authors* of the relevant journal for any special instructions relating to CIF submission.

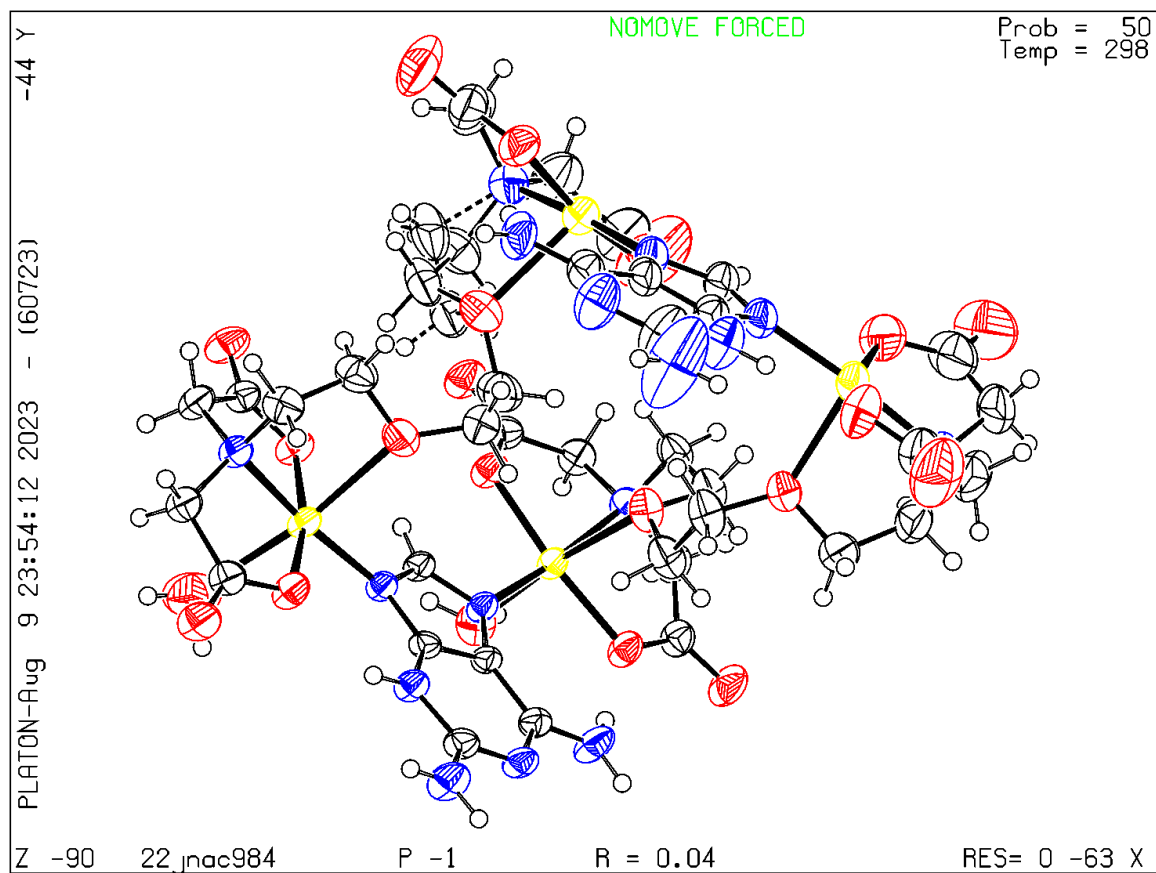

Supplement: Supplementary file 1 [file supplementary]
