# Supplementary material for: H(N3)dap (Hdap = 2,6-diaminopurine) Recognition by Cu<sub>2</sub>(EGTA): Structure, Physical Properties and DFT-Calculations of [Cu<sub>4</sub>(μ-EGTA)<sub>2</sub>(μ-H(N3)dap)<sub>2</sub>(H<sub>2</sub>O)<sub>2</sub>]·7H<sub>2</sub>O
Source: Preprints.org preprint supplement (doi:10.20944/preprints202308.0975.v1), 2023-08-14
Supplement: Supplementary file 2 [file supplementary]

Archive with 3 entries (3 files):
- ESI.docx
- 1.cif
- 1_checkcif.pdf
