# Supplementary material for: H(N3)dap (Hdap = 2,6-diaminopurine) Recognition by Cu<sub>2</sub>(EGTA): Structure, Physical Properties and DFT-Calculations of [Cu<sub>4</sub>(μ-EGTA)<sub>2</sub>(μ-H(N3)dap)<sub>2</sub>(H<sub>2</sub>O)<sub>2</sub>]·7H<sub>2</sub>O
Source: Preprints.org preprint supplement (doi:10.20944/preprints202308.0975.v1), 2023-08-14
Supplement: Supplementary file 2 [file supplementary › 1.cif]

data_22jnac984
_audit_creation_date               2022-03-02
_audit_creation_method
;
Olex2 1.3
(compiled 2020.11.12 svn.r5f609507 for OlexSys, GUI svn.r6408)
;
_shelx_SHELXL_version_number       '2019/1'
_audit_contact_author_address      ?
_audit_contact_author_email        ?
_audit_contact_author_name         ''
_audit_contact_author_phone        ?
_publ_contact_author_id_orcid      ?
_publ_section_references
;
Dolomanov, O.V., Bourhis, L.J., Gildea, R.J, Howard, J.A.K. & Puschmann, H.
 (2009), J. Appl. Cryst. 42, 339-341.

Sheldrick, G.M. (2008). Acta Cryst. A64, 112-122.
;
_chemical_name_common              ?
_chemical_name_systematic          ?
_chemical_formula_moiety           'C38 H56 Cu4 N16 O22, 7[H2O]'
_chemical_formula_sum              'C38 H70 Cu4 N16 O29'
_chemical_formula_weight           1469.24
_chemical_melting_point            ?
loop_
  _atom_type_symbol
  _atom_type_description
  _atom_type_scat_dispersion_real
  _atom_type_scat_dispersion_imag
  _atom_type_scat_source
 'C' 'C' 0.0181 0.0091 'International Tables Vol C Tables 4.2.6.8 and 6.1.1.4'
 'Cu' 'Cu' -1.9646 0.5888
 'International Tables Vol C Tables 4.2.6.8 and 6.1.1.4'
 'H' 'H' 0.0000 0.0000 'International Tables Vol C Tables 4.2.6.8 and 6.1.1.4'
 'N' 'N' 0.0311 0.0180 'International Tables Vol C Tables 4.2.6.8 and 6.1.1.4'
 'O' 'O' 0.0492 0.0322 'International Tables Vol C Tables 4.2.6.8 and 6.1.1.4'

_shelx_space_group_comment
;
The symmetry employed for this shelxl refinement is uniquely defined
by the following loop, which should always be used as a source of
symmetry information in preference to the above space-group names.
They are only intended as comments.
;
_space_group_crystal_system        'triclinic'
_space_group_IT_number             2
_space_group_name_H-M_alt          'P -1'
_space_group_name_Hall             '-P 1'
loop_
  _space_group_symop_operation_xyz
 'x, y, z'
 '-x, -y, -z'

_cell_length_a                     12.9272(4)
_cell_length_b                     13.1727(4)
_cell_length_c                     19.6298(6)
_cell_angle_alpha                  104.3720(10)
_cell_angle_beta                   94.015(2)
_cell_angle_gamma                  95.213(2)
_cell_volume                       3209.80(17)
_cell_formula_units_Z              2
_cell_measurement_reflns_used      9967
_cell_measurement_temperature      297.8
_cell_measurement_theta_max        66.59
_cell_measurement_theta_min        2.33
_shelx_estimated_absorpt_T_max     0.813
_shelx_estimated_absorpt_T_min     0.796
_exptl_absorpt_coefficient_mu      2.396
_exptl_absorpt_correction_T_max    1.000
_exptl_absorpt_correction_T_min    0.714
_exptl_absorpt_correction_type     multi-scan
_exptl_absorpt_process_details     SADABS
_exptl_absorpt_special_details     ?
_exptl_crystal_colour              Blue
_exptl_crystal_colour_primary      blue
_exptl_crystal_density_diffrn      1.520
_exptl_crystal_density_meas        ?
_exptl_crystal_density_method      ?
_exptl_crystal_description         plate
_exptl_crystal_F_000               1516
_exptl_crystal_size_max            0.10
_exptl_crystal_size_mid            0.10
_exptl_crystal_size_min            0.09
_exptl_transmission_factor_max     ?
_exptl_transmission_factor_min     ?
_diffrn_reflns_av_R_equivalents    0.0287
_diffrn_reflns_av_unetI/netI       0.0344
_diffrn_reflns_Laue_measured_fraction_full  0.962
_diffrn_reflns_Laue_measured_fraction_max  0.962
_diffrn_reflns_limit_h_max         15
_diffrn_reflns_limit_h_min         -14
_diffrn_reflns_limit_k_max         15
_diffrn_reflns_limit_k_min         -15
_diffrn_reflns_limit_l_max         23
_diffrn_reflns_limit_l_min         -23
_diffrn_reflns_number              23305
_diffrn_reflns_point_group_measured_fraction_full  0.962
_diffrn_reflns_point_group_measured_fraction_max  0.962
_diffrn_reflns_theta_full          66.591
_diffrn_reflns_theta_max           66.591
_diffrn_reflns_theta_min           2.334
_diffrn_ambient_temperature        298(2)
_diffrn_detector_area_resol_mean   ?
_diffrn_measured_fraction_theta_full  0.962
_diffrn_measured_fraction_theta_max  0.962
_diffrn_measurement_device_type    'D8 Venture'
_diffrn_measurement_method         '\f and \w scans'
_diffrn_radiation_monochromator    'multilayer'
_diffrn_radiation_type             'CuK\a'
_diffrn_radiation_wavelength       1.54178
_diffrn_source                     'high brilliance microfocus sealed tube'
_diffrn_source_current             1.0
_diffrn_source_power               0.05
_diffrn_source_voltage             50.0
_diffrn_standards_number           0
_reflns_Friedel_coverage           0.000
_reflns_Friedel_fraction_full      .
_reflns_Friedel_fraction_max       .
_reflns_number_gt                  9698
_reflns_number_total               10915
_reflns_special_details
;
 Reflections were merged by SHELXL according to the crystal
 class for the calculation of statistics and refinement.
 
 Structure factors included contributions from the .fab file.
 
 _reflns_Friedel_fraction is defined as the number of unique
 Friedel pairs measured divided by the number that would be
 possible theoretically, ignoring centric projections and
 systematic absences.
;
_reflns_threshold_expression       'I > 2\s(I)'
_computing_cell_refinement         'SAINT V8.40B (Bruker, 2016)'
_computing_data_collection         'Bruker Apex3, 2019'
_computing_data_reduction          'SAINT V8.40B (Bruker, 2013)'
_computing_molecular_graphics      'Olex2 1.3 (Dolomanov et al., 2009)'
_computing_publication_material    'Olex2 1.3 (Dolomanov et al., 2009)'
_computing_structure_refinement    'XL  (Sheldrick, 2008)'
_computing_structure_solution      'XT (Sheldrick, 2015)'
_refine_diff_density_max           0.462
_refine_diff_density_min           -0.429
_refine_diff_density_rms           0.050
_refine_ls_extinction_coef         .
_refine_ls_extinction_method       none
_refine_ls_goodness_of_fit_ref     1.038
_refine_ls_hydrogen_treatment      constr
_refine_ls_matrix_type             full
_refine_ls_number_parameters       742
_refine_ls_number_reflns           10915
_refine_ls_number_restraints       1
_refine_ls_R_factor_all            0.0394
_refine_ls_R_factor_gt             0.0354
_refine_ls_restrained_S_all        1.038
_refine_ls_shift/su_max            0.001
_refine_ls_shift/su_mean           0.000
_refine_ls_structure_factor_coef   Fsqd
_refine_ls_weighting_details      
 'w=1/[\s^2^(Fo^2^)+(0.0429P)^2^+2.2352P] where P=(Fo^2^+2Fc^2^)/3'
_refine_ls_weighting_scheme        calc
_refine_ls_wR_factor_gt            0.0956
_refine_ls_wR_factor_ref           0.0986
_refine_special_details            ?
_olex2_refinement_description
;
1. Fixed Uiso
 At 1.2 times of:
  All C(H) groups, All C(H,H) groups, All N(H) groups, All N(H,H) groups
 At 1.5 times of:
  All O(H,H) groups
2. Restrained distances
 C50B-C49B \\sim C49A-C50A
 with sigma of 0.02
3. Others
 Sof(C49B)=Sof(H49C)=Sof(H49D)=Sof(C50B)=Sof(H50C)=Sof(H50D)=1-FVAR(1)
 Sof(C49A)=Sof(H49A)=Sof(H49B)=Sof(C50A)=Sof(H50A)=Sof(H50B)=FVAR(1)
4.a Rotating group:
 O27(H27A,H27B), O62(H62A,H62B)
4.b Secondary CH2 refined with riding coordinates:
 C2(H2A,H2B), C6(H6A,H6B), C10(H10A,H10B), C11(H11A,H11B), C13(H13A,H13B),
 C14(H14A,H14B), C16(H16A,H16B), C17(H17A,H17B), C19(H19A,H19B), C23(H23A,H23B),
  C42(H42A,H42B), C46(H46A,H46B), C49A(H49A,H49B), C49B(H49C,H49D), C50A(H50A,
 H50B), C50B(H50C,H50D), C52(H52A,H52B), C53(H53A,H53B), C55(H55A,H55B),
 C56(H56A,H56B), C58(H58A,H58B), C62(H62C,H62D)
4.c Aromatic/amide H refined with riding coordinates:
 N33(H33), C38(H38), N73(H73), C78(H78)
4.d X=CH2 refined with riding coordinates:
 N32(H32A,H32B), N36(H36A,H36B), N72(H72A,H72B), N76(H76A,H76B)
;
_atom_sites_solution_hydrogens     mixed
_atom_sites_solution_primary       ?
_atom_sites_solution_secondary     ?
loop_
  _atom_site_label
  _atom_site_type_symbol
  _atom_site_fract_x
  _atom_site_fract_y
  _atom_site_fract_z
  _atom_site_U_iso_or_equiv
  _atom_site_adp_type
  _atom_site_occupancy
  _atom_site_site_symmetry_order
  _atom_site_calc_flag
  _atom_site_refinement_flags_posn
  _atom_site_refinement_flags_adp
  _atom_site_refinement_flags_occupancy
  _atom_site_disorder_assembly
  _atom_site_disorder_group
 Cu1 Cu 0.37566(3) 0.78396(3) 0.50589(2) 0.05028(11) Uani 1 1 d . . . . .
 N1 N 0.3176(2) 0.6756(2) 0.55271(12) 0.0624(7) Uani 1 1 d . . . . .
 Cu2 Cu 0.61964(3) 0.92025(3) 0.30228(2) 0.05021(11) Uani 1 1 d . . . . .
 C2 C 0.2326(4) 0.7193(3) 0.59393(18) 0.0810(11) Uani 1 1 d . . . . .
 H2A H 0.255185 0.734368 0.643936 0.097 Uiso 1 1 calc R U . . .
 H2B H 0.172121 0.666841 0.584011 0.097 Uiso 1 1 calc R U . . .
 Cu3 Cu 0.22280(2) 0.77048(2) 0.00605(2) 0.03185(9) Uani 1 1 d . . . . .
 C3 C 0.2020(3) 0.8179(3) 0.57721(19) 0.0772(10) Uani 1 1 d . . . . .
 Cu4 Cu 0.36544(2) 0.46116(2) 0.13481(2) 0.03127(9) Uani 1 1 d . . . . .
 O4 O 0.2565(2) 0.85641(19) 0.53563(12) 0.0716(6) Uani 1 1 d . . . . .
 O5 O 0.1275(3) 0.8576(3) 0.60457(18) 0.1153(11) Uani 1 1 d . . . . .
 C6 C 0.4077(4) 0.6565(3) 0.5961(2) 0.0914(14) Uani 1 1 d . . . . .
 H6A H 0.396745 0.585990 0.602952 0.110 Uiso 1 1 calc R U . . .
 H6B H 0.414709 0.706507 0.642148 0.110 Uiso 1 1 calc R U . . .
 C7 C 0.5055(4) 0.6679(3) 0.5606(2) 0.0882(13) Uani 1 1 d . . . . .
 O8 O 0.50454(19) 0.72277(18) 0.51420(14) 0.0739(6) Uani 1 1 d . . . . .
 O9 O 0.5819(3) 0.6275(2) 0.5779(2) 0.1245(13) Uani 1 1 d . . . . .
 C10 C 0.2803(3) 0.5772(2) 0.49713(16) 0.0649(8) Uani 1 1 d . . . . .
 H10A H 0.238419 0.529580 0.517597 0.078 Uiso 1 1 calc R U . . .
 H10B H 0.339885 0.542609 0.479744 0.078 Uiso 1 1 calc R U . . .
 C11 C 0.2166(3) 0.5989(3) 0.43664(15) 0.0620(8) Uani 1 1 d . . . . .
 H11A H 0.191068 0.533623 0.401803 0.074 Uiso 1 1 calc R U . . .
 H11B H 0.157359 0.634950 0.453102 0.074 Uiso 1 1 calc R U . . .
 O12 O 0.28496(15) 0.66416(15) 0.40692(9) 0.0488(4) Uani 1 1 d . . . . .
 C13 C 0.2409(2) 0.6835(2) 0.34298(14) 0.0542(7) Uani 1 1 d . . . . .
 H13A H 0.278751 0.746274 0.335523 0.065 Uiso 1 1 calc R U . . .
 H13B H 0.168981 0.696985 0.348052 0.065 Uiso 1 1 calc R U . . .
 C14 C 0.2443(2) 0.5925(2) 0.27888(13) 0.0487(6) Uani 1 1 d . . . . .
 H14A H 0.216802 0.527746 0.289513 0.058 Uiso 1 1 calc R U . . .
 H14B H 0.199104 0.602722 0.240127 0.058 Uiso 1 1 calc R U . . .
 O15 O 0.34605(14) 0.58086(14) 0.25673(9) 0.0453(4) Uani 1 1 d . . . . .
 C16 C 0.4121(2) 0.5343(2) 0.29909(13) 0.0475(6) Uani 1 1 d . . . . .
 H16A H 0.376416 0.469566 0.305090 0.057 Uiso 1 1 calc R U . . .
 H16B H 0.431130 0.582366 0.345359 0.057 Uiso 1 1 calc R U . . .
 C17 C 0.50769(19) 0.5119(2) 0.26119(13) 0.0444(6) Uani 1 1 d . . . . .
 H17A H 0.539040 0.576976 0.252874 0.053 Uiso 1 1 calc R U . . .
 H17B H 0.557747 0.488870 0.291690 0.053 Uiso 1 1 calc R U . . .
 N18 N 0.48807(14) 0.43043(15) 0.19226(10) 0.0347(4) Uani 1 1 d . . . . .
 C19 C 0.57783(17) 0.4401(2) 0.15033(13) 0.0393(5) Uani 1 1 d . . . . .
 H19A H 0.581871 0.373510 0.116307 0.047 Uiso 1 1 calc R U . . .
 H19B H 0.642264 0.457973 0.181288 0.047 Uiso 1 1 calc R U . . .
 C20 C 0.56338(17) 0.52624(19) 0.11193(13) 0.0371(5) Uani 1 1 d . . . . .
 O21 O 0.47216(11) 0.55356(13) 0.10635(9) 0.0406(4) Uani 1 1 d . . . . .
 O22 O 0.63863(12) 0.56382(15) 0.08740(10) 0.0493(4) Uani 1 1 d . . . . .
 C23 C 0.46083(19) 0.3238(2) 0.20179(14) 0.0427(6) Uani 1 1 d . . . . .
 H23A H 0.491386 0.320500 0.247651 0.051 Uiso 1 1 calc R U . . .
 H23B H 0.490171 0.272631 0.165980 0.051 Uiso 1 1 calc R U . . .
 C24 C 0.34366(19) 0.29537(18) 0.19663(13) 0.0384(5) Uani 1 1 d . . . . .
 O25 O 0.28706(12) 0.34920(13) 0.16597(9) 0.0397(4) Uani 1 1 d . . . . .
 O26 O 0.30948(15) 0.22125(15) 0.21936(11) 0.0541(5) Uani 1 1 d . . . . .
 O27 O 0.38278(14) 0.32509(15) 0.02334(10) 0.0498(4) Uani 1 1 d . . . . .
 H27A H 0.431201 0.283739 0.029853 0.075 Uiso 1 1 d R U . . .
 H27B H 0.407311 0.354685 -0.009250 0.075 Uiso 1 1 d R U . . .
 N31 N 0.2975(3) 1.1060(2) 0.37439(17) 0.0745(8) Uani 1 1 d . . . . .
 N32 N 0.1654(4) 1.1105(4) 0.4460(3) 0.156(2) Uani 1 1 d . . . . .
 H32A H 0.139626 1.156987 0.427924 0.188 Uiso 1 1 calc R U . . .
 H32B H 0.134965 1.089084 0.478292 0.188 Uiso 1 1 calc R U . . .
 C32 C 0.2512(3) 1.0723(3) 0.4243(2) 0.0846(11) Uani 1 1 d . . . . .
 N33 N 0.2886(2) 0.9987(2) 0.45493(15) 0.0675(7) Uani 1 1 d . . . . .
 H33 H 0.257175 0.977889 0.487083 0.081 Uiso 1 1 calc R U . . .
 C34 C 0.3769(2) 0.9600(2) 0.43258(14) 0.0474(6) Uani 1 1 d . . . . .
 C35 C 0.4304(2) 0.9945(2) 0.38311(13) 0.0454(6) Uani 1 1 d . . . . .
 N36 N 0.4306(2) 1.11139(19) 0.30510(13) 0.0595(6) Uani 1 1 d . . . . .
 H36A H 0.401140 1.157438 0.288643 0.071 Uiso 1 1 calc R U . . .
 H36B H 0.488302 1.091213 0.290235 0.071 Uiso 1 1 calc R U . . .
 C36 C 0.3871(2) 1.0714(2) 0.35348(15) 0.0520(7) Uani 1 1 d . . . . .
 N37 N 0.51570(18) 0.93875(17) 0.37207(11) 0.0463(5) Uani 1 1 d . . . . .
 C38 C 0.5086(2) 0.8749(2) 0.41515(14) 0.0492(6) Uani 1 1 d . . . . .
 H38 H 0.556825 0.827619 0.418447 0.059 Uiso 1 1 calc R U . . .
 N39 N 0.42585(18) 0.88453(17) 0.45350(11) 0.0468(5) Uani 1 1 d . . . . .
 N41 N 0.71832(19) 0.8890(2) 0.22741(13) 0.0566(6) Uani 1 1 d . . . . .
 C42 C 0.7852(3) 0.8127(3) 0.2471(2) 0.0834(11) Uani 1 1 d . . . . .
 H42A H 0.847094 0.850511 0.276427 0.100 Uiso 1 1 calc R U . . .
 H42B H 0.807158 0.767592 0.204817 0.100 Uiso 1 1 calc R U . . .
 C43 C 0.7251(3) 0.7461(3) 0.2869(2) 0.0816(11) Uani 1 1 d . . . . .
 O44 O 0.64364(18) 0.78161(19) 0.31304(14) 0.0748(7) Uani 1 1 d . . . . .
 O45 O 0.7565(3) 0.6644(3) 0.2935(2) 0.1242(13) Uani 1 1 d . . . . .
 C46 C 0.7749(3) 0.9901(3) 0.2263(2) 0.0794(11) Uani 1 1 d . . . . .
 H46A H 0.793455 0.987307 0.178883 0.095 Uiso 1 1 calc R U . . .
 H46B H 0.838801 1.003169 0.257612 0.095 Uiso 1 1 calc R U . . .
 C47 C 0.7089(3) 1.0783(3) 0.24930(17) 0.0722(10) Uani 1 1 d . . . . .
 O48 O 0.63943(18) 1.06349(15) 0.29091(11) 0.0622(5) Uani 1 1 d . . . . .
 O49 O 0.7250(3) 1.1600(2) 0.23037(14) 0.1081(11) Uani 1 1 d . . . . .
 C49A C 0.6538(14) 0.8765(14) 0.1518(8) 0.073(5) Uani 0.290(11) 1 d D . P A 1
 H49A H 0.635839 0.944671 0.147310 0.088 Uiso 0.290(11) 1 calc R U P A 1
 H49B H 0.695605 0.848218 0.113861 0.088 Uiso 0.290(11) 1 calc R U P A 1
 C49B C 0.6557(5) 0.8266(6) 0.1618(3) 0.0627(17) Uani 0.710(11) 1 d D . P A 2
 H49C H 0.634665 0.756311 0.166640 0.075 Uiso 0.710(11) 1 calc R U P A 2
 H49D H 0.698440 0.819748 0.122538 0.075 Uiso 0.710(11) 1 calc R U P A 2
 C50A C 0.5584(10) 0.8044(10) 0.1477(6) 0.063(4) Uani 0.290(11) 1 d D . P A 1
 H50A H 0.572690 0.743141 0.164351 0.075 Uiso 0.290(11) 1 calc R U P A 1
 H50B H 0.523785 0.781670 0.100133 0.075 Uiso 0.290(11) 1 calc R U P A 1
 C50B C 0.5610(4) 0.8768(5) 0.1462(2) 0.0633(17) Uani 0.710(11) 1 d D . P A 2
 H50C H 0.581517 0.948059 0.143180 0.076 Uiso 0.710(11) 1 calc R U P A 2
 H50D H 0.525183 0.837302 0.101036 0.076 Uiso 0.710(11) 1 calc R U P A 2
 O51 O 0.49330(16) 0.87920(17) 0.19940(11) 0.0617(5) Uani 1 1 d . . . . .
 C52 C 0.4048(3) 0.8030(3) 0.1928(2) 0.0722(10) Uani 1 1 d . . . . .
 H52A H 0.409146 0.771593 0.232561 0.087 Uiso 1 1 calc R U . . .
 H52B H 0.405637 0.747356 0.150001 0.087 Uiso 1 1 calc R U . . .
 C53 C 0.3059(2) 0.8502(3) 0.19051(16) 0.0613(8) Uani 1 1 d . . . . .
 H53A H 0.250719 0.801968 0.199934 0.074 Uiso 1 1 calc R U . . .
 H53B H 0.311722 0.914589 0.228159 0.074 Uiso 1 1 calc R U . . .
 O54 O 0.27599(15) 0.87430(14) 0.12535(9) 0.0507(4) Uani 1 1 d . . . . .
 C55 C 0.3213(2) 0.9702(2) 0.11480(15) 0.0498(6) Uani 1 1 d . . . . .
 H55A H 0.391685 0.963337 0.101454 0.060 Uiso 1 1 calc R U . . .
 H55B H 0.324437 1.026185 0.157904 0.060 Uiso 1 1 calc R U . . .
 C56 C 0.2538(2) 0.99542(19) 0.05656(14) 0.0454(6) Uani 1 1 d . . . . .
 H56A H 0.184249 1.003165 0.071260 0.054 Uiso 1 1 calc R U . . .
 H56B H 0.282119 1.062360 0.049420 0.054 Uiso 1 1 calc R U . . .
 N57 N 0.24631(14) 0.91323(14) -0.01179(10) 0.0331(4) Uani 1 1 d . . . . .
 C58 C 0.15066(17) 0.92030(19) -0.05641(14) 0.0390(5) Uani 1 1 d . . . . .
 H58A H 0.159597 0.890634 -0.105777 0.047 Uiso 1 1 calc R U . . .
 H58B H 0.139290 0.993674 -0.050302 0.047 Uiso 1 1 calc R U . . .
 C59 C 0.05623(18) 0.86035(18) -0.03571(13) 0.0386(5) Uani 1 1 d . . . . .
 O60 O 0.07520(12) 0.79665(13) 0.00182(10) 0.0422(4) Uani 1 1 d . . . . .
 O61 O -0.03177(13) 0.87441(15) -0.05694(11) 0.0532(5) Uani 1 1 d . . . . .
 O62 O 0.1885(2) 0.6759(2) -0.12496(15) 0.0900(8) Uani 1 1 d . . . . .
 H62A H 0.159587 0.717019 -0.152118 0.135 Uiso 1 1 d R U . . .
 H62B H 0.136403 0.619718 -0.132926 0.135 Uiso 1 1 d R U . . .
 C62 C 0.34403(18) 0.91498(19) -0.04675(14) 0.0404(5) Uani 1 1 d . . . . .
 H62C H 0.381464 0.985237 -0.031600 0.048 Uiso 1 1 calc R U . . .
 H62D H 0.327123 0.898675 -0.097492 0.048 Uiso 1 1 calc R U . . .
 C63 C 0.41388(17) 0.83583(17) -0.02933(12) 0.0345(5) Uani 1 1 d . . . . .
 O64 O 0.37123(12) 0.76284(12) -0.00510(9) 0.0379(4) Uani 1 1 d . . . . .
 O65 O 0.50649(13) 0.84408(14) -0.04096(11) 0.0491(4) Uani 1 1 d . . . . .
 N71 N -0.03465(14) 0.49945(15) 0.11760(10) 0.0358(4) Uani 1 1 d . . . . .
 N72 N -0.14943(15) 0.60812(18) 0.08635(13) 0.0483(5) Uani 1 1 d . . . . .
 H72A H -0.198611 0.577713 0.104078 0.058 Uiso 1 1 calc R U . . .
 H72B H -0.161699 0.658526 0.067319 0.058 Uiso 1 1 calc R U . . .
 C72 C -0.05431(16) 0.57714(18) 0.08836(12) 0.0345(5) Uani 1 1 d . . . . .
 N73 N 0.01836(13) 0.62932(15) 0.05940(10) 0.0343(4) Uani 1 1 d . . . . .
 H73 H 0.003121 0.678455 0.039911 0.041 Uiso 1 1 calc R U . . .
 C74 C 0.11702(15) 0.60040(16) 0.06254(11) 0.0278(4) Uani 1 1 d . . . . .
 C75 C 0.14409(15) 0.52318(16) 0.09432(11) 0.0277(4) Uani 1 1 d . . . . .
 N76 N 0.07762(15) 0.39197(17) 0.15118(12) 0.0467(5) Uani 1 1 d . . . . .
 H76A H 0.026120 0.361841 0.167015 0.056 Uiso 1 1 calc R U . . .
 H76B H 0.138540 0.371292 0.154592 0.056 Uiso 1 1 calc R U . . .
 C76 C 0.06320(16) 0.46968(17) 0.12173(12) 0.0329(5) Uani 1 1 d . . . . .
 N77 N 0.24986(13) 0.51558(14) 0.08798(9) 0.0294(4) Uani 1 1 d . . . . .
 C78 C 0.27744(15) 0.58603(17) 0.05274(11) 0.0296(4) Uani 1 1 d . . . . .
 H78 H 0.344955 0.596929 0.040419 0.035 Uiso 1 1 calc R U . . .
 N79 N 0.20009(13) 0.64088(14) 0.03603(9) 0.0297(4) Uani 1 1 d . . . . .

loop_
  _atom_site_aniso_label
  _atom_site_aniso_U_11
  _atom_site_aniso_U_22
  _atom_site_aniso_U_33
  _atom_site_aniso_U_23
  _atom_site_aniso_U_13
  _atom_site_aniso_U_12
 Cu1 0.0643(3) 0.0473(2) 0.0422(2) 0.02052(17) 0.00047(18) 0.00016(18)
 N1 0.093(2) 0.0527(14) 0.0401(12) 0.0181(11) -0.0008(12) -0.0113(13)
 Cu2 0.0565(2) 0.0483(2) 0.0457(2) 0.01559(17) 0.00413(18) -0.00402(18)
 C2 0.121(3) 0.074(2) 0.0470(17) 0.0162(16) 0.0270(19) -0.013(2)
 Cu3 0.02218(16) 0.03187(17) 0.04708(19) 0.02013(14) 0.00298(13) 0.00450(12)
 C3 0.089(3) 0.085(2) 0.0568(19) 0.0200(18) 0.0134(18) -0.005(2)
 Cu4 0.02119(15) 0.03793(18) 0.04132(18) 0.02199(14) 0.00229(12) 0.00539(12)
 O4 0.0858(16) 0.0770(15) 0.0642(13) 0.0333(12) 0.0285(12) 0.0139(12)
 O5 0.099(2) 0.161(3) 0.111(2) 0.062(2) 0.0534(19) 0.034(2)
 C6 0.129(4) 0.078(2) 0.068(2) 0.044(2) -0.030(2) -0.022(2)
 C7 0.108(3) 0.059(2) 0.098(3) 0.038(2) -0.038(3) -0.002(2)
 O8 0.0707(14) 0.0683(14) 0.0914(17) 0.0434(13) -0.0112(12) 0.0046(11)
 O9 0.125(3) 0.091(2) 0.169(3) 0.070(2) -0.049(2) 0.0141(19)
 C10 0.096(2) 0.0491(16) 0.0482(16) 0.0167(13) 0.0068(16) -0.0102(16)
 C11 0.0693(19) 0.0648(19) 0.0453(15) 0.0088(14) 0.0057(14) -0.0133(15)
 O12 0.0565(11) 0.0543(11) 0.0343(9) 0.0108(8) 0.0029(8) 0.0012(8)
 C13 0.0623(17) 0.0642(18) 0.0375(13) 0.0106(12) 0.0042(12) 0.0210(14)
 C14 0.0445(14) 0.0632(17) 0.0369(13) 0.0078(12) 0.0021(11) 0.0141(12)
 O15 0.0487(10) 0.0549(10) 0.0367(9) 0.0154(8) 0.0066(7) 0.0166(8)
 C16 0.0491(15) 0.0586(16) 0.0357(13) 0.0127(11) -0.0006(11) 0.0133(12)
 C17 0.0388(13) 0.0535(15) 0.0403(13) 0.0128(11) -0.0053(10) 0.0072(11)
 N18 0.0283(9) 0.0392(10) 0.0401(10) 0.0156(8) 0.0020(8) 0.0076(8)
 C19 0.0243(11) 0.0482(13) 0.0503(14) 0.0188(11) 0.0046(10) 0.0116(10)
 C20 0.0241(11) 0.0451(13) 0.0425(12) 0.0116(10) 0.0040(9) 0.0047(9)
 O21 0.0220(7) 0.0503(10) 0.0586(10) 0.0301(8) 0.0043(7) 0.0058(7)
 O22 0.0256(8) 0.0652(12) 0.0659(12) 0.0310(10) 0.0116(8) 0.0058(8)
 C23 0.0376(13) 0.0452(13) 0.0543(15) 0.0277(12) 0.0023(11) 0.0111(10)
 C24 0.0388(12) 0.0367(12) 0.0442(13) 0.0174(10) 0.0034(10) 0.0087(10)
 O25 0.0296(8) 0.0450(9) 0.0540(10) 0.0294(8) 0.0042(7) 0.0066(7)
 O26 0.0534(11) 0.0485(10) 0.0734(13) 0.0409(10) 0.0035(9) 0.0044(8)
 O27 0.0435(10) 0.0593(11) 0.0520(10) 0.0186(9) 0.0107(8) 0.0167(8)
 N31 0.087(2) 0.0644(17) 0.090(2) 0.0434(16) 0.0191(17) 0.0276(15)
 N32 0.150(4) 0.170(4) 0.227(6) 0.137(4) 0.114(4) 0.113(4)
 C32 0.092(3) 0.075(2) 0.107(3) 0.047(2) 0.033(2) 0.036(2)
 N33 0.0784(18) 0.0648(16) 0.0725(17) 0.0338(14) 0.0236(14) 0.0198(14)
 C34 0.0599(16) 0.0405(13) 0.0423(13) 0.0134(11) 0.0003(12) 0.0043(12)
 C35 0.0585(16) 0.0395(13) 0.0391(13) 0.0146(11) -0.0015(11) 0.0017(11)
 N36 0.0804(18) 0.0503(13) 0.0576(14) 0.0311(12) 0.0040(13) 0.0111(12)
 C36 0.0669(18) 0.0406(14) 0.0495(15) 0.0161(12) -0.0035(13) 0.0050(13)
 N37 0.0581(13) 0.0435(12) 0.0386(11) 0.0166(9) -0.0008(10) 0.0003(10)
 C38 0.0571(16) 0.0470(14) 0.0468(14) 0.0200(12) 0.0002(12) 0.0046(12)
 N39 0.0577(13) 0.0434(12) 0.0415(11) 0.0172(9) -0.0008(10) 0.0031(10)
 N41 0.0545(14) 0.0656(15) 0.0486(13) 0.0161(11) 0.0035(11) -0.0010(11)
 C42 0.055(2) 0.103(3) 0.106(3) 0.047(2) 0.0215(19) 0.0172(19)
 C43 0.059(2) 0.089(3) 0.115(3) 0.051(2) 0.017(2) 0.0222(19)
 O44 0.0649(14) 0.0791(15) 0.0998(18) 0.0504(14) 0.0249(13) 0.0207(12)
 O45 0.097(2) 0.124(3) 0.196(4) 0.096(3) 0.051(2) 0.058(2)
 C46 0.093(3) 0.080(2) 0.067(2) 0.0238(18) 0.0272(19) -0.014(2)
 C47 0.105(3) 0.0606(19) 0.0466(16) 0.0131(15) 0.0125(17) -0.0190(19)
 O48 0.0826(15) 0.0481(11) 0.0522(11) 0.0121(9) 0.0088(10) -0.0121(10)
 O49 0.190(3) 0.0636(15) 0.0729(16) 0.0251(13) 0.0432(19) -0.0182(18)
 C49A 0.111(14) 0.072(11) 0.034(6) 0.003(7) 0.005(6) 0.024(10)
 C49B 0.063(3) 0.067(4) 0.051(3) 0.001(3) 0.002(2) 0.014(3)
 C50A 0.095(10) 0.042(7) 0.048(6) 0.011(5) -0.008(5) 0.007(6)
 C50B 0.077(4) 0.073(4) 0.037(2) 0.012(2) -0.008(2) 0.009(3)
 O51 0.0530(11) 0.0725(14) 0.0574(12) 0.0189(10) -0.0100(9) 0.0013(10)
 C52 0.082(2) 0.0532(18) 0.078(2) 0.0281(16) -0.0297(18) -0.0102(16)
 C53 0.0588(18) 0.076(2) 0.0498(16) 0.0255(15) 0.0002(13) -0.0119(15)
 O54 0.0556(11) 0.0494(10) 0.0450(10) 0.0140(8) -0.0089(8) -0.0010(8)
 C55 0.0527(15) 0.0395(13) 0.0517(15) 0.0048(11) -0.0060(12) 0.0035(11)
 C56 0.0474(14) 0.0333(12) 0.0541(15) 0.0081(11) 0.0006(12) 0.0097(10)
 N57 0.0268(9) 0.0325(9) 0.0436(10) 0.0160(8) 0.0024(8) 0.0049(7)
 C58 0.0311(11) 0.0394(12) 0.0528(14) 0.0232(11) -0.0001(10) 0.0078(9)
 C59 0.0307(12) 0.0380(12) 0.0502(14) 0.0166(11) 0.0004(10) 0.0078(9)
 O60 0.0283(8) 0.0469(9) 0.0621(11) 0.0323(8) 0.0037(7) 0.0085(7)
 O61 0.0292(9) 0.0603(11) 0.0795(13) 0.0367(10) -0.0041(8) 0.0087(8)
 O62 0.0869(18) 0.0746(16) 0.0953(19) 0.0054(14) 0.0061(15) -0.0127(14)
 C62 0.0316(11) 0.0420(13) 0.0541(14) 0.0243(11) 0.0071(10) 0.0025(10)
 C63 0.0297(11) 0.0329(11) 0.0418(12) 0.0114(9) 0.0048(9) 0.0030(9)
 O64 0.0282(8) 0.0355(8) 0.0554(10) 0.0194(7) 0.0080(7) 0.0069(6)
 O65 0.0294(9) 0.0512(10) 0.0724(12) 0.0236(9) 0.0149(8) 0.0046(7)
 N71 0.0225(9) 0.0404(10) 0.0469(11) 0.0159(9) 0.0066(8) 0.0008(7)
 N72 0.0234(9) 0.0593(13) 0.0708(15) 0.0292(12) 0.0107(9) 0.0097(9)
 C72 0.0230(10) 0.0391(12) 0.0412(12) 0.0107(10) 0.0026(9) 0.0028(9)
 N73 0.0215(8) 0.0388(10) 0.0476(11) 0.0192(8) 0.0035(8) 0.0057(7)
 C74 0.0187(9) 0.0300(10) 0.0345(11) 0.0090(8) -0.0009(8) 0.0030(8)
 C75 0.0193(9) 0.0319(10) 0.0327(10) 0.0108(8) 0.0018(8) 0.0008(8)
 N76 0.0285(10) 0.0500(12) 0.0734(15) 0.0360(11) 0.0115(10) 0.0048(9)
 C76 0.0266(10) 0.0359(11) 0.0365(11) 0.0109(9) 0.0027(9) 0.0006(9)
 N77 0.0216(8) 0.0331(9) 0.0383(10) 0.0169(8) 0.0045(7) 0.0042(7)
 C78 0.0195(9) 0.0344(11) 0.0384(11) 0.0155(9) 0.0039(8) 0.0043(8)
 N79 0.0209(8) 0.0334(9) 0.0385(10) 0.0163(8) 0.0013(7) 0.0036(7)

_geom_special_details
;
 All esds (except the esd in the dihedral angle between two l.s. planes)
 are estimated using the full covariance matrix.  The cell esds are taken
 into account individually in the estimation of esds in distances, angles
 and torsion angles; correlations between esds in cell parameters are only
 used when they are defined by crystal symmetry.  An approximate (isotropic)
 treatment of cell esds is used for estimating esds involving l.s. planes.
;
loop_
  _geom_bond_atom_site_label_1
  _geom_bond_atom_site_label_2
  _geom_bond_distance
  _geom_bond_site_symmetry_2
  _geom_bond_publ_flag
 Cu1 N1 2.000(2) . y 
 Cu1 O4 1.934(2) . y
 Cu1 O8 1.930(2) . y
 Cu1 O12 2.3372(18) . y
 Cu1 N39 1.961(2) . y
 N1 C2 1.484(5) . ?
 N1 C6 1.472(5) . ?
 N1 C10 1.488(4) . ?
 Cu2 N37 1.973(2) . y
 Cu2 N41 2.004(3) . y
 Cu2 O44 1.939(2) . y
 Cu2 O48 1.951(2) . y
 Cu2 O51 2.424(2) . y
 C2 H2A 0.9700 . ?
 C2 H2B 0.9700 . ?
 C2 C3 1.496(6) . ?
 Cu3 O54 2.4167(18) . y
 Cu3 N57 1.9974(18) . y
 Cu3 O60 1.9692(15) . y
 Cu3 O62 2.552(3) . y
 Cu3 O64 1.9552(15) . y
 Cu3 N79 1.9439(17) . y
 C3 O4 1.281(4) . ?
 C3 O5 1.229(5) . ?
 Cu4 O15 2.5611(17) . y
 Cu4 N18 2.0103(18) . y
 Cu4 O21 1.9588(15) . y
 Cu4 O25 1.9594(16) . y
 Cu4 O27 2.4991(18) . y
 Cu4 N77 1.9801(17) . y
 C6 H6A 0.9700 . ?
 C6 H6B 0.9700 . ?
 C6 C7 1.499(7) . ?
 C7 O8 1.296(4) . ?
 C7 O9 1.229(5) . ?
 C10 H10A 0.9700 . ?
 C10 H10B 0.9700 . ?
 C10 C11 1.498(5) . ?
 C11 H11A 0.9700 . ?
 C11 H11B 0.9700 . ?
 C11 O12 1.430(3) . ?
 O12 C13 1.431(3) . ?
 C13 H13A 0.9700 . ?
 C13 H13B 0.9700 . ?
 C13 C14 1.514(4) . ?
 C14 H14A 0.9700 . ?
 C14 H14B 0.9700 . ?
 C14 O15 1.424(3) . ?
 O15 C16 1.430(3) . ?
 C16 H16A 0.9700 . ?
 C16 H16B 0.9700 . ?
 C16 C17 1.501(4) . ?
 C17 H17A 0.9700 . ?
 C17 H17B 0.9700 . ?
 C17 N18 1.493(3) . ?
 N18 C19 1.483(3) . ?
 N18 C23 1.477(3) . ?
 C19 H19A 0.9700 . ?
 C19 H19B 0.9700 . ?
 C19 C20 1.528(3) . ?
 C20 O21 1.269(3) . ?
 C20 O22 1.233(3) . ?
 C23 H23A 0.9700 . ?
 C23 H23B 0.9700 . ?
 C23 C24 1.517(3) . ?
 C24 O25 1.283(3) . ?
 C24 O26 1.230(3) . ?
 O27 H27A 0.8889 . ?
 O27 H27B 0.8897 . ?
 N31 C32 1.329(5) . ?
 N31 C36 1.337(4) . ?
 N32 H32A 0.8600 . ?
 N32 H32B 0.8600 . ?
 N32 C32 1.314(5) . ?
 C32 N33 1.368(4) . ?
 N33 H33 0.8600 . ?
 N33 C34 1.348(4) . ?
 C34 C35 1.373(4) . ?
 C34 N39 1.356(3) . ?
 C35 C36 1.425(4) . ?
 C35 N37 1.379(4) . ?
 N36 H36A 0.8600 . ?
 N36 H36B 0.8600 . ?
 N36 C36 1.329(4) . ?
 N37 C38 1.335(3) . ?
 C38 H38 0.9300 . ?
 C38 N39 1.348(4) . ?
 N41 C42 1.487(5) . ?
 N41 C46 1.466(4) . ?
 N41 C49A 1.615(17) . ?
 N41 C49B 1.482(6) . ?
 C42 H42A 0.9700 . ?
 C42 H42B 0.9700 . ?
 C42 C43 1.512(5) . ?
 C43 O44 1.279(4) . ?
 C43 O45 1.217(5) . ?
 C46 H46A 0.9700 . ?
 C46 H46B 0.9700 . ?
 C46 C47 1.501(6) . ?
 C47 O48 1.289(4) . ?
 C47 O49 1.229(4) . ?
 C49A H49A 0.9700 . ?
 C49A H49B 0.9700 . ?
 C49A C50A 1.471(15) . ?
 C49B H49C 0.9700 . ?
 C49B H49D 0.9700 . ?
 C49B C50B 1.492(7) . ?
 C50A H50A 0.9700 . ?
 C50A H50B 0.9700 . ?
 C50A O51 1.576(13) . ?
 C50B H50C 0.9700 . ?
 C50B H50D 0.9700 . ?
 C50B O51 1.405(6) . ?
 O51 C52 1.428(4) . ?
 C52 H52A 0.9700 . ?
 C52 H52B 0.9700 . ?
 C52 C53 1.474(5) . ?
 C53 H53A 0.9700 . ?
 C53 H53B 0.9700 . ?
 C53 O54 1.429(3) . ?
 O54 C55 1.413(3) . ?
 C55 H55A 0.9700 . ?
 C55 H55B 0.9700 . ?
 C55 C56 1.510(4) . ?
 C56 H56A 0.9700 . ?
 C56 H56B 0.9700 . ?
 C56 N57 1.491(3) . ?
 N57 C58 1.488(3) . ?
 N57 C62 1.480(3) . ?
 C58 H58A 0.9700 . ?
 C58 H58B 0.9700 . ?
 C58 C59 1.527(3) . ?
 C59 O60 1.275(3) . ?
 C59 O61 1.230(3) . ?
 O62 H62A 0.9321 . ?
 O62 H62B 0.9289 . ?
 C62 H62C 0.9700 . ?
 C62 H62D 0.9700 . ?
 C62 C63 1.524(3) . ?
 C63 O64 1.274(3) . ?
 C63 O65 1.235(3) . ?
 N71 C72 1.327(3) . ?
 N71 C76 1.361(3) . ?
 N72 H72A 0.8600 . ?
 N72 H72B 0.8600 . ?
 N72 C72 1.331(3) . ?
 C72 N73 1.353(3) . ?
 N73 H73 0.8600 . ?
 N73 C74 1.366(3) . ?
 C74 C75 1.377(3) . ?
 C74 N79 1.349(3) . ?
 C75 C76 1.419(3) . ?
 C75 N77 1.392(3) . ?
 N76 H76A 0.8600 . ?
 N76 H76B 0.8600 . ?
 N76 C76 1.315(3) . ?
 N77 C78 1.327(3) . ?
 C78 H78 0.9300 . ?
 C78 N79 1.354(3) . ?

loop_
  _geom_angle_atom_site_label_1
  _geom_angle_atom_site_label_2
  _geom_angle_atom_site_label_3
  _geom_angle
  _geom_angle_site_symmetry_1
  _geom_angle_site_symmetry_3
  _geom_angle_publ_flag
 N1 Cu1 O12 80.98(8) . . y
 O4 Cu1 N1 85.34(11) . . y
 O4 Cu1 O12 95.41(9) . . y
 O4 Cu1 N39 94.42(9) . . y
 O8 Cu1 N1 84.73(11) . . y
 O8 Cu1 O4 158.40(11) . . y
 O8 Cu1 O12 101.90(9) . . y
 O8 Cu1 N39 96.90(10) . . y
 N39 Cu1 N1 175.67(10) . . y
 N39 Cu1 O12 94.75(8) . . y
 C2 N1 Cu1 107.9(2) . . ?
 C2 N1 C10 112.5(3) . . ?
 C6 N1 Cu1 104.4(2) . . ?
 C6 N1 C2 114.1(3) . . ?
 C6 N1 C10 109.1(3) . . ?
 C10 N1 Cu1 108.45(17) . . ?
 N37 Cu2 N41 174.95(10) . . y
 N37 Cu2 O51 95.53(8) . . y
 N41 Cu2 O51 81.50(9) . . y
 O44 Cu2 N37 93.06(9) . . y
 O44 Cu2 N41 83.64(10) . . y
 O44 Cu2 O48 163.30(10) . . y
 O44 Cu2 O51 102.54(10) . . y
 O48 Cu2 N37 99.56(9) . . y
 O48 Cu2 N41 84.43(10) . . y
 O48 Cu2 O51 87.19(8) . . y 
 N1 C2 H2A 109.1 . . ?
 N1 C2 H2B 109.1 . . ?
 N1 C2 C3 112.6(3) . . ?
 H2A C2 H2B 107.8 . . ?
 C3 C2 H2A 109.1 . . ?
 C3 C2 H2B 109.1 . . ?
 O54 Cu3 O62 171.82(8) . . y
 N57 Cu3 O54 80.48(7) . . y
 N57 Cu3 O62 93.71(9) . . y
 O60 Cu3 O54 98.15(7) . . y
 O60 Cu3 N57 83.61(7) . . y
 O60 Cu3 O62 86.84(9) . . y
 O64 Cu3 O54 86.78(7) . . y
 O64 Cu3 N57 85.73(7) . . y
 O64 Cu3 O60 167.33(7) . . y
 O64 Cu3 O62 87.05(8) . . y
 N79 Cu3 O54 92.48(7) . . y
 N79 Cu3 N57 172.71(8) . . y
 N79 Cu3 O60 95.59(7) . . y
 N79 Cu3 O62 93.48(9) . . y
 N79 Cu3 O64 95.85(7) . . y
 O4 C3 C2 117.3(4) . . ?
 O5 C3 C2 118.5(3) . . ?
 O5 C3 O4 124.2(4) . . ?
 N18 Cu4 O15 79.03(7) . . y
 N18 Cu4 O27 97.01(7) . . y
 O21 Cu4 O15 97.78(7) . . y
 O21 Cu4 N18 82.77(7) . . y
 O21 Cu4 O25 166.11(6) . . y
 O21 Cu4 O27 87.86(7) . . y
 O21 Cu4 N77 92.84(7) . . y
 O25 Cu4 O15 86.33(7) . . y
 O25 Cu4 N18 85.02(7) . . y
 O25 Cu4 O27 87.08(7) . . y
 O25 Cu4 N77 100.19(7) . . y
 O27 Cu4 O15 172.58(6) . . y
 N77 Cu4 O15 93.35(7) . . y
 N77 Cu4 N18 170.55(8) . . y
 N77 Cu4 O27 91.16(7) . . y
 C3 O4 Cu1 115.5(3) . . ?
 N1 C6 H6A 109.6 . . ?
 N1 C6 H6B 109.6 . . ?
 N1 C6 C7 110.2(3) . . ?
 H6A C6 H6B 108.1 . . ?
 C7 C6 H6A 109.6 . . ?
 C7 C6 H6B 109.6 . . ?
 O8 C7 C6 117.1(4) . . ?
 O9 C7 C6 119.1(4) . . ?
 O9 C7 O8 123.8(5) . . ?
 C7 O8 Cu1 112.8(3) . . ?
 N1 C10 H10A 109.2 . . ?
 N1 C10 H10B 109.2 . . ?
 N1 C10 C11 111.9(3) . . ?
 H10A C10 H10B 107.9 . . ?
 C11 C10 H10A 109.2 . . ?
 C11 C10 H10B 109.2 . . ?
 C10 C11 H11A 110.6 . . ?
 C10 C11 H11B 110.6 . . ?
 H11A C11 H11B 108.7 . . ?
 O12 C11 C10 105.9(3) . . ?
 O12 C11 H11A 110.6 . . ?
 O12 C11 H11B 110.6 . . ?
 C11 O12 Cu1 103.55(15) . . ?
 C11 O12 C13 114.0(2) . . ?
 C13 O12 Cu1 128.88(17) . . ?
 O12 C13 H13A 109.0 . . ?
 O12 C13 H13B 109.0 . . ?
 O12 C13 C14 113.0(2) . . ?
 H13A C13 H13B 107.8 . . ?
 C14 C13 H13A 109.0 . . ?
 C14 C13 H13B 109.0 . . ?
 C13 C14 H14A 108.8 . . ?
 C13 C14 H14B 108.8 . . ?
 H14A C14 H14B 107.7 . . ?
 O15 C14 C13 113.9(2) . . ?
 O15 C14 H14A 108.8 . . ?
 O15 C14 H14B 108.8 . . ?
 C14 O15 Cu4 119.05(14) . . ?
 C14 O15 C16 114.86(19) . . ?
 C16 O15 Cu4 99.17(13) . . ?
 O15 C16 H16A 110.3 . . ?
 O15 C16 H16B 110.3 . . ?
 O15 C16 C17 107.1(2) . . ?
 H16A C16 H16B 108.6 . . ?
 C17 C16 H16A 110.3 . . ?
 C17 C16 H16B 110.3 . . ?
 C16 C17 H17A 108.6 . . ?
 C16 C17 H17B 108.6 . . ?
 H17A C17 H17B 107.6 . . ?
 N18 C17 C16 114.5(2) . . ?
 N18 C17 H17A 108.6 . . ?
 N18 C17 H17B 108.6 . . ?
 C17 N18 Cu4 109.74(14) . . ?
 C19 N18 Cu4 104.87(13) . . ?
 C19 N18 C17 108.90(18) . . ?
 C23 N18 Cu4 106.23(14) . . ?
 C23 N18 C17 111.98(19) . . ?
 C23 N18 C19 114.78(18) . . ?
 N18 C19 H19A 109.9 . . ?
 N18 C19 H19B 109.9 . . ?
 N18 C19 C20 108.99(17) . . ?
 H19A C19 H19B 108.3 . . ?
 C20 C19 H19A 109.9 . . ?
 C20 C19 H19B 109.9 . . ?
 O21 C20 C19 116.77(19) . . ?
 O22 C20 C19 119.4(2) . . ?
 O22 C20 O21 123.8(2) . . ?
 C20 O21 Cu4 113.59(15) . . ?
 N18 C23 H23A 109.2 . . ?
 N18 C23 H23B 109.2 . . ?
 N18 C23 C24 111.86(18) . . ?
 H23A C23 H23B 107.9 . . ?
 C24 C23 H23A 109.2 . . ?
 C24 C23 H23B 109.2 . . ?
 O25 C24 C23 116.5(2) . . ?
 O26 C24 C23 118.9(2) . . ?
 O26 C24 O25 124.5(2) . . ?
 C24 O25 Cu4 114.56(14) . . ?
 Cu4 O27 H27A 111.2 . . ?
 Cu4 O27 H27B 111.1 . . ?
 H27A O27 H27B 102.8 . . ?
 C32 N31 C36 120.6(3) . . ?
 H32A N32 H32B 120.0 . . ?
 C32 N32 H32A 120.0 . . ?
 C32 N32 H32B 120.0 . . ?
 N31 C32 N33 123.0(3) . . ?
 N32 C32 N31 119.5(4) . . ?
 N32 C32 N33 117.5(4) . . ?
 C32 N33 H33 121.4 . . ?
 C34 N33 C32 117.2(3) . . ?
 C34 N33 H33 121.4 . . ?
 N33 C34 C35 122.5(3) . . ?
 N33 C34 N39 127.4(3) . . ?
 N39 C34 C35 110.0(3) . . ?
 C34 C35 C36 117.3(3) . . ?
 C34 C35 N37 107.6(2) . . ?
 N37 C35 C36 135.0(3) . . ?
 H36A N36 H36B 120.0 . . ?
 C36 N36 H36A 120.0 . . ?
 C36 N36 H36B 120.0 . . ?
 N31 C36 C35 119.3(3) . . ?
 N36 C36 N31 117.1(3) . . ?
 N36 C36 C35 123.6(3) . . ?
 C35 N37 Cu2 135.29(17) . . ?
 C38 N37 Cu2 119.56(19) . . ?
 C38 N37 C35 104.3(2) . . ?
 N37 C38 H38 122.8 . . ?
 N37 C38 N39 114.5(2) . . ?
 N39 C38 H38 122.8 . . ?
 C34 N39 Cu1 129.9(2) . . ?
 C38 N39 Cu1 124.69(18) . . ?
 C38 N39 C34 103.6(2) . . ?
 C42 N41 Cu2 106.1(2) . . ?
 C42 N41 C49A 126.7(7) . . ?
 C46 N41 Cu2 106.8(2) . . ?
 C46 N41 C42 114.5(3) . . ?
 C46 N41 C49A 92.9(6) . . ?
 C46 N41 C49B 118.0(4) . . ?
 C49A N41 Cu2 108.1(6) . . ?
 C49B N41 Cu2 106.9(3) . . ?
 C49B N41 C42 103.7(4) . . ?
 N41 C42 H42A 109.7 . . ?
 N41 C42 H42B 109.7 . . ?
 N41 C42 C43 109.8(3) . . ?
 H42A C42 H42B 108.2 . . ?
 C43 C42 H42A 109.7 . . ?
 C43 C42 H42B 109.7 . . ?
 O44 C43 C42 116.5(3) . . ?
 O45 C43 C42 119.6(4) . . ?
 O45 C43 O44 123.9(4) . . ?
 C43 O44 Cu2 115.0(2) . . ?
 N41 C46 H46A 109.5 . . ?
 N41 C46 H46B 109.5 . . ?
 N41 C46 C47 110.6(3) . . ?
 H46A C46 H46B 108.1 . . ?
 C47 C46 H46A 109.5 . . ?
 C47 C46 H46B 109.5 . . ?
 O48 C47 C46 116.1(3) . . ?
 O49 C47 C46 120.1(3) . . ?
 O49 C47 O48 123.7(4) . . ?
 C47 O48 Cu2 114.5(2) . . ?
 N41 C49A H49A 110.1 . . ?
 N41 C49A H49B 110.1 . . ?
 H49A C49A H49B 108.5 . . ?
 C50A C49A N41 107.8(11) . . ?
 C50A C49A H49A 110.1 . . ?
 C50A C49A H49B 110.1 . . ?
 N41 C49B H49C 109.3 . . ?
 N41 C49B H49D 109.3 . . ?
 N41 C49B C50B 111.8(5) . . ?
 H49C C49B H49D 107.9 . . ?
 C50B C49B H49C 109.3 . . ?
 C50B C49B H49D 109.3 . . ?
 C49A C50A H50A 111.8 . . ?
 C49A C50A H50B 111.8 . . ?
 C49A C50A O51 99.9(11) . . ?
 H50A C50A H50B 109.5 . . ?
 O51 C50A H50A 111.8 . . ?
 O51 C50A H50B 111.8 . . ?
 C49B C50B H50C 109.6 . . ?
 C49B C50B H50D 109.6 . . ?
 H50C C50B H50D 108.1 . . ?
 O51 C50B C49B 110.4(5) . . ?
 O51 C50B H50C 109.6 . . ?
 O51 C50B H50D 109.6 . . ?
 C50A O51 Cu2 97.1(4) . . ?
 C50B O51 Cu2 99.9(2) . . ?
 C50B O51 C52 123.1(3) . . ?
 C52 O51 Cu2 120.76(18) . . ?
 C52 O51 C50A 95.8(5) . . ?
 O51 C52 H52A 109.2 . . ?
 O51 C52 H52B 109.2 . . ?
 O51 C52 C53 111.9(3) . . ?
 H52A C52 H52B 107.9 . . ?
 C53 C52 H52A 109.2 . . ?
 C53 C52 H52B 109.2 . . ?
 C52 C53 H53A 108.5 . . ?
 C52 C53 H53B 108.5 . . ?
 H53A C53 H53B 107.5 . . ?
 O54 C53 C52 115.1(3) . . ?
 O54 C53 H53A 108.5 . . ?
 O54 C53 H53B 108.5 . . ?
 C53 O54 Cu3 134.59(18) . . ?
 C55 O54 Cu3 102.59(14) . . ?
 C55 O54 C53 117.5(2) . . ?
 O54 C55 H55A 110.2 . . ?
 O54 C55 H55B 110.2 . . ?
 O54 C55 C56 107.4(2) . . ?
 H55A C55 H55B 108.5 . . ?
 C56 C55 H55A 110.2 . . ?
 C56 C55 H55B 110.2 . . ?
 C55 C56 H56A 108.9 . . ?
 C55 C56 H56B 108.9 . . ?
 H56A C56 H56B 107.7 . . ?
 N57 C56 C55 113.3(2) . . ?
 N57 C56 H56A 108.9 . . ?
 N57 C56 H56B 108.9 . . ?
 C56 N57 Cu3 109.42(14) . . ?
 C58 N57 Cu3 104.02(13) . . ?
 C58 N57 C56 109.68(18) . . ?
 C62 N57 Cu3 106.08(13) . . ?
 C62 N57 C56 112.22(19) . . ?
 C62 N57 C58 114.92(18) . . ?
 N57 C58 H58A 109.6 . . ?
 N57 C58 H58B 109.6 . . ?
 N57 C58 C59 110.09(18) . . ?
 H58A C58 H58B 108.2 . . ?
 C59 C58 H58A 109.6 . . ?
 C59 C58 H58B 109.6 . . ?
 O60 C59 C58 116.61(19) . . ?
 O61 C59 C58 118.9(2) . . ?
 O61 C59 O60 124.5(2) . . ?
 C59 O60 Cu3 112.29(14) . . ?
 Cu3 O62 H62A 113.3 . . ?
 Cu3 O62 H62B 111.5 . . ?
 H62A O62 H62B 100.9 . . ?
 N57 C62 H62C 109.3 . . ?
 N57 C62 H62D 109.3 . . ?
 N57 C62 C63 111.67(18) . . ?
 H62C C62 H62D 107.9 . . ?
 C63 C62 H62C 109.3 . . ?
 C63 C62 H62D 109.3 . . ?
 O64 C63 C62 117.01(19) . . ?
 O65 C63 C62 119.0(2) . . ?
 O65 C63 O64 124.0(2) . . ?
 C63 O64 Cu3 114.06(14) . . ?
 C72 N71 C76 120.64(19) . . ?
 H72A N72 H72B 120.0 . . ?
 C72 N72 H72A 120.0 . . ?
 C72 N72 H72B 120.0 . . ?
 N71 C72 N72 120.4(2) . . ?
 N71 C72 N73 123.47(19) . . ?
 N72 C72 N73 116.1(2) . . ?
 C72 N73 H73 121.5 . . ?
 C72 N73 C74 116.93(19) . . ?
 C74 N73 H73 121.5 . . ?
 N73 C74 C75 122.84(19) . . ?
 N79 C74 N73 126.44(19) . . ?
 N79 C74 C75 110.72(17) . . ?
 C74 C75 C76 117.11(18) . . ?
 C74 C75 N77 106.98(17) . . ?
 N77 C75 C76 135.85(19) . . ?
 H76A N76 H76B 120.0 . . ?
 C76 N76 H76A 120.0 . . ?
 C76 N76 H76B 120.0 . . ?
 N71 C76 C75 118.9(2) . . ?
 N76 C76 N71 117.7(2) . . ?
 N76 C76 C75 123.3(2) . . ?
 C75 N77 Cu4 137.40(14) . . ?
 C78 N77 Cu4 116.13(13) . . ?
 C78 N77 C75 104.08(16) . . ?
 N77 C78 H78 122.5 . . ?
 N77 C78 N79 115.08(18) . . ?
 N79 C78 H78 122.5 . . ?
 C74 N79 Cu3 130.53(14) . . ?
 C74 N79 C78 103.13(17) . . ?
 C78 N79 Cu3 124.19(14) . . ?

loop_
  _geom_hbond_atom_site_label_D
  _geom_hbond_atom_site_label_H
  _geom_hbond_atom_site_label_A
  _geom_hbond_distance_DH
  _geom_hbond_distance_HA
  _geom_hbond_distance_DA
  _geom_hbond_angle_DHA
  _geom_hbond_site_symmetry_A
  _geom_hbond_publ_flag
 O27 H27A O65 0.89 1.98 2.833(3) 159.4 2_665 yes
 O27 H27B O22 0.89 2.16 2.917(3) 142.7 2_665 yes
 N33 H33 O4 0.86 2.06 2.760(3) 138.6 . yes
 N36 H36A O26 0.86 2.12 2.938(3) 159.4 1_565 yes
 N36 H36B O48 0.86 2.02 2.844(4) 160.3 . yes
 O62 H62B N71 0.93 2.05 2.947(3) 162.0 2_565 yes
 N72 H72A O22 0.86 2.09 2.751(3) 133.2 1_455 yes
 N73 H73 O60 0.86 2.06 2.781(2) 140.3 . yes
 N76 H76B O25 0.86 1.97 2.825(3) 170.4 . yes

loop_
  _geom_torsion_atom_site_label_1
  _geom_torsion_atom_site_label_2
  _geom_torsion_atom_site_label_3
  _geom_torsion_atom_site_label_4
  _geom_torsion
  _geom_torsion_site_symmetry_1
  _geom_torsion_site_symmetry_2
  _geom_torsion_site_symmetry_3
  _geom_torsion_site_symmetry_4
  _geom_torsion_publ_flag
 Cu1 N1 C2 C3 11.4(4) . . . . ?
 Cu1 N1 C6 C7 -33.0(4) . . . . ?
 Cu1 N1 C10 C11 -46.4(3) . . . . ?
 Cu1 O12 C13 C14 147.11(19) . . . . ?
 N1 C2 C3 O4 -5.7(5) . . . . ?
 N1 C2 C3 O5 175.2(4) . . . . ?
 N1 C6 C7 O8 21.6(5) . . . . ?
 N1 C6 C7 O9 -160.0(4) . . . . ?
 N1 C10 C11 O12 62.2(3) . . . . ?
 Cu2 N37 C38 N39 -171.01(17) . . . . ?
 Cu2 N41 C42 C43 29.6(4) . . . . ?
 Cu2 N41 C46 C47 -28.9(3) . . . . ?
 Cu2 N41 C49A C50A -48.9(14) . . . . ?
 Cu2 N41 C49B C50B 49.7(7) . . . . ?
 Cu2 O51 C52 C53 117.4(2) . . . . ?
 C2 N1 C6 C7 -150.5(3) . . . . ?
 C2 N1 C10 C11 72.8(3) . . . . ?
 C2 C3 O4 Cu1 -3.6(4) . . . . ?
 Cu3 O54 C55 C56 40.6(2) . . . . ?
 Cu3 N57 C58 C59 33.5(2) . . . . ?
 Cu3 N57 C62 C63 -24.3(2) . . . . ?
 Cu4 O15 C16 C17 42.6(2) . . . . ?
 Cu4 N18 C19 C20 34.0(2) . . . . ?
 Cu4 N18 C23 C24 -25.3(2) . . . . ?
 Cu4 N77 C78 N79 -164.55(15) . . . . ?
 O5 C3 O4 Cu1 175.4(3) . . . . ?
 C6 N1 C2 C3 126.8(3) . . . . ?
 C6 N1 C10 C11 -159.5(3) . . . . ?
 C6 C7 O8 Cu1 3.2(4) . . . . ?
 O9 C7 O8 Cu1 -175.2(3) . . . . ?
 C10 N1 C2 C3 -108.2(3) . . . . ?
 C10 N1 C6 C7 82.7(3) . . . . ?
 C10 C11 O12 Cu1 -42.3(3) . . . . ?
 C10 C11 O12 C13 173.2(2) . . . . ?
 C11 O12 C13 C14 -79.4(3) . . . . ?
 O12 C13 C14 O15 -72.2(3) . . . . ?
 C13 C14 O15 Cu4 -166.20(17) . . . . ?
 C13 C14 O15 C16 76.5(3) . . . . ?
 C14 O15 C16 C17 170.7(2) . . . . ?
 O15 C16 C17 N18 -65.7(3) . . . . ?
 C16 C17 N18 Cu4 47.6(2) . . . . ?
 C16 C17 N18 C19 161.8(2) . . . . ?
 C16 C17 N18 C23 -70.1(3) . . . . ?
 C17 N18 C19 C20 -83.4(2) . . . . ?
 C17 N18 C23 C24 94.5(2) . . . . ?
 N18 C19 C20 O21 -17.6(3) . . . . ?
 N18 C19 C20 O22 163.6(2) . . . . ?
 N18 C23 C24 O25 19.3(3) . . . . ?
 N18 C23 C24 O26 -163.2(2) . . . . ?
 C19 N18 C23 C24 -140.7(2) . . . . ?
 C19 C20 O21 Cu4 -9.8(3) . . . . ?
 O22 C20 O21 Cu4 169.0(2) . . . . ?
 C23 N18 C19 C20 150.2(2) . . . . ?
 C23 C24 O25 Cu4 -1.9(3) . . . . ?
 O26 C24 O25 Cu4 -179.3(2) . . . . ?
 N31 C32 N33 C34 0.2(6) . . . . ?
 N32 C32 N33 C34 -179.8(4) . . . . ?
 C32 N31 C36 C35 2.6(5) . . . . ?
 C32 N31 C36 N36 -177.7(3) . . . . ?
 C32 N33 C34 C35 2.3(5) . . . . ?
 C32 N33 C34 N39 -177.6(3) . . . . ?
 N33 C34 C35 C36 -2.2(4) . . . . ?
 N33 C34 C35 N37 -179.6(3) . . . . ?
 N33 C34 N39 Cu1 14.6(4) . . . . ?
 N33 C34 N39 C38 179.5(3) . . . . ?
 C34 C35 C36 N31 -0.3(4) . . . . ?
 C34 C35 C36 N36 -179.9(3) . . . . ?
 C34 C35 N37 Cu2 168.59(19) . . . . ?
 C34 C35 N37 C38 -0.1(3) . . . . ?
 C35 C34 N39 Cu1 -165.34(18) . . . . ?
 C35 C34 N39 C38 -0.4(3) . . . . ?
 C35 N37 C38 N39 -0.1(3) . . . . ?
 C36 N31 C32 N32 177.3(5) . . . . ?
 C36 N31 C32 N33 -2.7(6) . . . . ?
 C36 C35 N37 Cu2 -8.1(5) . . . . ?
 C36 C35 N37 C38 -176.8(3) . . . . ?
 N37 C35 C36 N31 176.2(3) . . . . ?
 N37 C35 C36 N36 -3.4(5) . . . . ?
 N37 C38 N39 Cu1 166.32(18) . . . . ?
 N37 C38 N39 C34 0.3(3) . . . . ?
 N39 C34 C35 C36 177.7(2) . . . . ?
 N39 C34 C35 N37 0.3(3) . . . . ?
 N41 C42 C43 O44 -17.9(5) . . . . ?
 N41 C42 C43 O45 163.3(4) . . . . ?
 N41 C46 C47 O48 26.8(4) . . . . ?
 N41 C46 C47 O49 -155.6(3) . . . . ?
 N41 C49A C50A O51 73.9(14) . . . . ?
 N41 C49B C50B O51 -64.1(8) . . . . ?
 C42 N41 C46 C47 -146.0(3) . . . . ?
 C42 N41 C49A C50A 78.6(15) . . . . ?
 C42 N41 C49B C50B 161.5(6) . . . . ?
 C42 C43 O44 Cu2 -4.5(5) . . . . ?
 O45 C43 O44 Cu2 174.2(4) . . . . ?
 C46 N41 C42 C43 147.2(3) . . . . ?
 C46 N41 C49A C50A -157.6(13) . . . . ?
 C46 N41 C49B C50B -70.6(7) . . . . ?
 C46 C47 O48 Cu2 -9.7(4) . . . . ?
 O49 C47 O48 Cu2 172.7(3) . . . . ?
 C49A N41 C42 C43 -98.7(8) . . . . ?
 C49A N41 C46 C47 81.0(7) . . . . ?
 C49A C50A O51 Cu2 -57.1(11) . . . . ?
 C49A C50A O51 C52 -179.2(10) . . . . ?
 C49B N41 C42 C43 -82.9(5) . . . . ?
 C49B N41 C46 C47 91.4(4) . . . . ?
 C49B C50B O51 Cu2 38.9(6) . . . . ?
 C49B C50B O51 C52 -98.2(5) . . . . ?
 C50A O51 C52 C53 -140.7(5) . . . . ?
 C50B O51 C52 C53 -113.9(4) . . . . ?
 O51 C52 C53 O54 74.7(4) . . . . ?
 C52 C53 O54 Cu3 66.6(3) . . . . ?
 C52 C53 O54 C55 -82.5(3) . . . . ?
 C53 O54 C55 C56 -161.4(2) . . . . ?
 O54 C55 C56 N57 -60.5(3) . . . . ?
 C55 C56 N57 Cu3 44.6(2) . . . . ?
 C55 C56 N57 C58 158.1(2) . . . . ?
 C55 C56 N57 C62 -72.9(3) . . . . ?
 C56 N57 C58 C59 -83.5(2) . . . . ?
 C56 N57 C62 C63 95.2(2) . . . . ?
 N57 C58 C59 O60 -15.5(3) . . . . ?
 N57 C58 C59 O61 166.0(2) . . . . ?
 N57 C62 C63 O64 18.0(3) . . . . ?
 N57 C62 C63 O65 -163.9(2) . . . . ?
 C58 N57 C62 C63 -138.6(2) . . . . ?
 C58 C59 O60 Cu3 -12.3(3) . . . . ?
 O61 C59 O60 Cu3 166.2(2) . . . . ?
 C62 N57 C58 C59 149.0(2) . . . . ?
 C62 C63 O64 Cu3 -1.0(3) . . . . ?
 O65 C63 O64 Cu3 -179.09(19) . . . . ?
 N71 C72 N73 C74 -1.5(3) . . . . ?
 N72 C72 N73 C74 178.4(2) . . . . ?
 C72 N71 C76 C75 0.1(3) . . . . ?
 C72 N71 C76 N76 -179.8(2) . . . . ?
 C72 N73 C74 C75 -1.0(3) . . . . ?
 C72 N73 C74 N79 178.8(2) . . . . ?
 N73 C74 C75 C76 2.8(3) . . . . ?
 N73 C74 C75 N77 -179.55(19) . . . . ?
 N73 C74 N79 Cu3 16.7(3) . . . . ?
 N73 C74 N79 C78 -179.9(2) . . . . ?
 C74 C75 C76 N71 -2.3(3) . . . . ?
 C74 C75 C76 N76 177.6(2) . . . . ?
 C74 C75 N77 Cu4 159.74(17) . . . . ?
 C74 C75 N77 C78 -0.9(2) . . . . ?
 C75 C74 N79 Cu3 -163.49(15) . . . . ?
 C75 C74 N79 C78 0.0(2) . . . . ?
 C75 N77 C78 N79 1.0(2) . . . . ?
 C76 N71 C72 N72 -178.0(2) . . . . ?
 C76 N71 C72 N73 1.9(3) . . . . ?
 C76 C75 N77 Cu4 -23.3(4) . . . . ?
 C76 C75 N77 C78 176.1(2) . . . . ?
 N77 C75 C76 N71 -179.1(2) . . . . ?
 N77 C75 C76 N76 0.9(4) . . . . ?
 N77 C78 N79 Cu3 164.23(15) . . . . ?
 N77 C78 N79 C74 -0.6(3) . . . . ?
 N79 C74 C75 C76 -177.05(18) . . . . ?
 N79 C74 C75 N77 0.6(2) . . . . ?

_smtbx_masks_special_details       ?
loop_
  _smtbx_masks_void_nr
  _smtbx_masks_void_average_x
  _smtbx_masks_void_average_y
  _smtbx_masks_void_average_z
  _smtbx_masks_void_volume
  _smtbx_masks_void_count_electrons
  _smtbx_masks_void_content
 1 0.000 -0.270 0.500 864.7 231.8 '24 H2O'

_smtbx_masks_void_probe_radius     1.2
_smtbx_masks_void_truncation_radius  1.2
_shelx_res_file
;
TITL C984.res in P-1
    1_a.res
    created by SHELXL-2019/1 at 20:33:33 on 02-Mar-2022
REM Old TITL 1 in P-1
REM SHELXT solution in P-1: R1 0.150, Rweak 0.009, Alpha 0.096
REM <I/s> 0.000 for 0 systematic absences, Orientation as input
REM Formula found by SHELXT: C43 N17 O22 Cu4
CELL 1.54178 12.9272 13.1727 19.6298 104.372 94.015 95.213
ZERR 2 0.0004 0.0004 0.0006 0.001 0.002 0.002
LATT 1
SFAC C Cu H N O
UNIT 76 8 160 32 68
EQIV $1 -X,1-Y,-Z
EQIV $2 1-X,1-Y,-Z
EQIV $3 +X,1+Y,+Z
EQIV $4 -1+X,+Y,+Z
SADI C50B C49B C49A C50A

L.S. 10
PLAN  10
SIZE 0.1 0.1 0.09
TEMP 25(2)
CONF
HTAB O62 N71_$1
HTAB O27 O22_$2
HTAB O27 O65_$2
HTAB N33 O4
HTAB N36 O26_$3
HTAB N36 O48
HTAB N72 O22_$4
HTAB N73 O60
HTAB N76 O25
BIND Cu3 O62
BIND Cu4 O27
BIND O15 Cu4
BOND $H
LIST 4
MORE -1
BOND $H
ABIN
fmap 2
acta
SHEL 999 0.84
REM <olex2.extras>
REM <HklSrc "%.\\cu_JN_C984_0m.hkl">
REM </olex2.extras>

WGHT    0.042900    2.235200
FVAR       0.45954   0.28992
CU1   2    0.375664    0.783963    0.505890    11.00000    0.06429    0.04732 =
         0.04223    0.02052    0.00047    0.00016
N1    4    0.317594    0.675564    0.552713    11.00000    0.09299    0.05270 =
         0.04009    0.01815   -0.00084   -0.01126
CU2   2    0.619641    0.920253    0.302284    11.00000    0.05648    0.04830 =
         0.04574    0.01559    0.00413   -0.00402
C2    1    0.232594    0.719340    0.593930    11.00000    0.12054    0.07398 =
         0.04705    0.01623    0.02700   -0.01276
AFIX  23
H2A   3    0.255185    0.734368    0.643936    11.00000   -1.20000
H2B   3    0.172121    0.666841    0.584011    11.00000   -1.20000
AFIX   0
CU3   2    0.222797    0.770478    0.006055    11.00000    0.02218    0.03187 =
         0.04708    0.02013    0.00298    0.00450
C3    1    0.201978    0.817940    0.577207    11.00000    0.08913    0.08486 =
         0.05677    0.02005    0.01338   -0.00494
CU4   2    0.365445    0.461159    0.134811    11.00000    0.02119    0.03793 =
         0.04132    0.02199    0.00229    0.00539
O4    5    0.256509    0.856413    0.535629    11.00000    0.08583    0.07697 =
         0.06415    0.03335    0.02847    0.01389
O5    5    0.127538    0.857571    0.604573    11.00000    0.09861    0.16108 =
         0.11061    0.06171    0.05336    0.03358
C6    1    0.407727    0.656482    0.596121    11.00000    0.12888    0.07806 =
         0.06843    0.04389   -0.03036   -0.02181
AFIX  23
H6A   3    0.396745    0.585990    0.602952    11.00000   -1.20000
H6B   3    0.414709    0.706507    0.642148    11.00000   -1.20000
AFIX   0
C7    1    0.505504    0.667903    0.560650    11.00000    0.10832    0.05873 =
         0.09773    0.03752   -0.03802   -0.00182
O8    5    0.504544    0.722766    0.514203    11.00000    0.07066    0.06831 =
         0.09143    0.04335   -0.01116    0.00455
O9    5    0.581938    0.627545    0.577856    11.00000    0.12464    0.09081 =
         0.16868    0.06979   -0.04856    0.01407
C10   1    0.280277    0.577164    0.497131    11.00000    0.09606    0.04907 =
         0.04824    0.01666    0.00684   -0.01016
AFIX  23
H10A  3    0.238419    0.529580    0.517597    11.00000   -1.20000
H10B  3    0.339885    0.542609    0.479744    11.00000   -1.20000
AFIX   0
C11   1    0.216598    0.598900    0.436642    11.00000    0.06929    0.06481 =
         0.04529    0.00885    0.00574   -0.01332
AFIX  23
H11A  3    0.191068    0.533623    0.401803    11.00000   -1.20000
H11B  3    0.157359    0.634950    0.453102    11.00000   -1.20000
AFIX   0
O12   5    0.284957    0.664160    0.406920    11.00000    0.05647    0.05426 =
         0.03426    0.01079    0.00293    0.00119
C13   1    0.240936    0.683499    0.342984    11.00000    0.06228    0.06421 =
         0.03750    0.01059    0.00418    0.02101
AFIX  23
H13A  3    0.278751    0.746274    0.335523    11.00000   -1.20000
H13B  3    0.168981    0.696985    0.348052    11.00000   -1.20000
AFIX   0
C14   1    0.244287    0.592490    0.278877    11.00000    0.04452    0.06316 =
         0.03689    0.00778    0.00210    0.01409
AFIX  23
H14A  3    0.216802    0.527746    0.289513    11.00000   -1.20000
H14B  3    0.199104    0.602722    0.240127    11.00000   -1.20000
AFIX   0
O15   5    0.346054    0.580859    0.256728    11.00000    0.04869    0.05488 =
         0.03674    0.01538    0.00655    0.01657
C16   1    0.412102    0.534347    0.299086    11.00000    0.04907    0.05863 =
         0.03569    0.01269   -0.00064    0.01326
AFIX  23
H16A  3    0.376416    0.469566    0.305090    11.00000   -1.20000
H16B  3    0.431130    0.582366    0.345359    11.00000   -1.20000
AFIX   0
C17   1    0.507694    0.511921    0.261194    11.00000    0.03880    0.05350 =
         0.04030    0.01282   -0.00532    0.00720
AFIX  23
H17A  3    0.539040    0.576976    0.252874    11.00000   -1.20000
H17B  3    0.557747    0.488870    0.291690    11.00000   -1.20000
AFIX   0
N18   4    0.488066    0.430425    0.192259    11.00000    0.02835    0.03920 =
         0.04006    0.01562    0.00199    0.00764
C19   1    0.577834    0.440118    0.150329    11.00000    0.02429    0.04823 =
         0.05026    0.01880    0.00459    0.01165
AFIX  23
H19A  3    0.581871    0.373510    0.116307    11.00000   -1.20000
H19B  3    0.642264    0.457973    0.181288    11.00000   -1.20000
AFIX   0
C20   1    0.563378    0.526239    0.111925    11.00000    0.02410    0.04514 =
         0.04252    0.01161    0.00395    0.00465
O21   5    0.472156    0.553562    0.106353    11.00000    0.02202    0.05026 =
         0.05865    0.03011    0.00430    0.00580
O22   5    0.638628    0.563819    0.087395    11.00000    0.02558    0.06522 =
         0.06585    0.03101    0.01165    0.00579
C23   1    0.460829    0.323792    0.201794    11.00000    0.03761    0.04519 =
         0.05431    0.02766    0.00231    0.01110
AFIX  23
H23A  3    0.491386    0.320500    0.247651    11.00000   -1.20000
H23B  3    0.490171    0.272631    0.165980    11.00000   -1.20000
AFIX   0
C24   1    0.343663    0.295369    0.196633    11.00000    0.03877    0.03670 =
         0.04416    0.01738    0.00337    0.00874
O25   5    0.287057    0.349196    0.165971    11.00000    0.02961    0.04503 =
         0.05402    0.02941    0.00415    0.00659
O26   5    0.309483    0.221253    0.219361    11.00000    0.05339    0.04847 =
         0.07336    0.04094    0.00351    0.00443
O27   5    0.382781    0.325092    0.023340    11.00000    0.04346    0.05926 =
         0.05199    0.01859    0.01072    0.01673
AFIX   7
H27A  3    0.431201    0.283739    0.029853    11.00000   -1.50000
H27B  3    0.407311    0.354685   -0.009250    11.00000   -1.50000
AFIX   0
N31   4    0.297497    1.106010    0.374392    11.00000    0.08741    0.06436 =
         0.08970    0.04338    0.01910    0.02757
N32   4    0.165375    1.110528    0.446005    11.00000    0.14983    0.17038 =
         0.22692    0.13702    0.11362    0.11290
AFIX  93
H32A  3    0.139626    1.156987    0.427924    11.00000   -1.20000
H32B  3    0.134965    1.089084    0.478292    11.00000   -1.20000
AFIX   0
C32   1    0.251164    1.072315    0.424304    11.00000    0.09231    0.07523 =
         0.10744    0.04720    0.03302    0.03639
N33   4    0.288597    0.998666    0.454933    11.00000    0.07842    0.06477 =
         0.07254    0.03375    0.02357    0.01981
AFIX  43
H33   3    0.257175    0.977889    0.487083    11.00000   -1.20000
AFIX   0
C34   1    0.376851    0.960025    0.432581    11.00000    0.05988    0.04046 =
         0.04230    0.01340    0.00028    0.00430
C35   1    0.430425    0.994492    0.383108    11.00000    0.05849    0.03952 =
         0.03909    0.01462   -0.00152    0.00169
N36   4    0.430629    1.111392    0.305098    11.00000    0.08037    0.05029 =
         0.05755    0.03108    0.00398    0.01112
AFIX  93
H36A  3    0.401140    1.157438    0.288643    11.00000   -1.20000
H36B  3    0.488302    1.091213    0.290235    11.00000   -1.20000
AFIX   0
C36   1    0.387090    1.071432    0.353478    11.00000    0.06687    0.04055 =
         0.04952    0.01606   -0.00346    0.00498
N37   4    0.515697    0.938745    0.372069    11.00000    0.05813    0.04354 =
         0.03859    0.01659   -0.00076    0.00033
C38   1    0.508625    0.874882    0.415150    11.00000    0.05714    0.04701 =
         0.04681    0.01997    0.00021    0.00463
AFIX  43
H38   3    0.556825    0.827619    0.418447    11.00000   -1.20000
AFIX   0
N39   4    0.425853    0.884526    0.453496    11.00000    0.05769    0.04341 =
         0.04147    0.01722   -0.00076    0.00313
N41   4    0.718323    0.888952    0.227410    11.00000    0.05455    0.06563 =
         0.04864    0.01607    0.00352   -0.00099
C42   1    0.785193    0.812651    0.247100    11.00000    0.05515    0.10297 =
         0.10634    0.04666    0.02153    0.01720
AFIX  23
H42A  3    0.847094    0.850511    0.276427    11.00000   -1.20000
H42B  3    0.807158    0.767592    0.204817    11.00000   -1.20000
AFIX   0
C43   1    0.725062    0.746059    0.286920    11.00000    0.05852    0.08855 =
         0.11509    0.05112    0.01681    0.02218
O44   5    0.643644    0.781612    0.313037    11.00000    0.06489    0.07912 =
         0.09982    0.05035    0.02486    0.02066
O45   5    0.756456    0.664372    0.293544    11.00000    0.09664    0.12393 =
         0.19563    0.09577    0.05104    0.05820
C46   1    0.774880    0.990116    0.226292    11.00000    0.09283    0.07987 =
         0.06669    0.02377    0.02721   -0.01369
AFIX  23
H46A  3    0.793455    0.987307    0.178883    11.00000   -1.20000
H46B  3    0.838801    1.003169    0.257612    11.00000   -1.20000
AFIX   0
C47   1    0.708937    1.078285    0.249298    11.00000    0.10450    0.06065 =
         0.04655    0.01309    0.01246   -0.01900
O48   5    0.639427    1.063492    0.290908    11.00000    0.08255    0.04806 =
         0.05225    0.01211    0.00876   -0.01210
O49   5    0.724997    1.160045    0.230375    11.00000    0.19025    0.06359 =
         0.07288    0.02506    0.04317   -0.01817
PART 1
C49A  1    0.653775    0.876544    0.151782    21.00000    0.11103    0.07216 =
         0.03372    0.00339    0.00525    0.02361
AFIX  23
H49A  3    0.635839    0.944671    0.147310    21.00000   -1.20000
H49B  3    0.695605    0.848218    0.113861    21.00000   -1.20000
AFIX   0
PART 2
C49B  1    0.655733    0.826553    0.161793   -21.00000    0.06346    0.06699 =
         0.05064    0.00060    0.00157    0.01429
AFIX  23
H49C  3    0.634665    0.756311    0.166640   -21.00000   -1.20000
H49D  3    0.698440    0.819748    0.122538   -21.00000   -1.20000
AFIX   0
PART 1
C50A  1    0.558445    0.804389    0.147712    21.00000    0.09549    0.04200 =
         0.04832    0.01082   -0.00835    0.00716
AFIX  23
H50A  3    0.572690    0.743141    0.164351    21.00000   -1.20000
H50B  3    0.523785    0.781670    0.100133    21.00000   -1.20000
AFIX   0
PART 2
C50B  1    0.560991    0.876755    0.146216   -21.00000    0.07719    0.07325 =
         0.03655    0.01192   -0.00756    0.00860
AFIX  23
H50C  3    0.581517    0.948059    0.143180   -21.00000   -1.20000
H50D  3    0.525183    0.837302    0.101036   -21.00000   -1.20000
AFIX   0
PART 0
O51   5    0.493297    0.879197    0.199403    11.00000    0.05302    0.07252 =
         0.05741    0.01892   -0.01004    0.00127
C52   1    0.404787    0.802996    0.192827    11.00000    0.08238    0.05323 =
         0.07817    0.02809   -0.02973   -0.01022
AFIX  23
H52A  3    0.409146    0.771593    0.232561    11.00000   -1.20000
H52B  3    0.405637    0.747356    0.150001    11.00000   -1.20000
AFIX   0
C53   1    0.305891    0.850189    0.190508    11.00000    0.05885    0.07590 =
         0.04978    0.02554    0.00017   -0.01190
AFIX  23
H53A  3    0.250719    0.801968    0.199934    11.00000   -1.20000
H53B  3    0.311722    0.914589    0.228159    11.00000   -1.20000
AFIX   0
O54   5    0.275987    0.874303    0.125347    11.00000    0.05555    0.04942 =
         0.04498    0.01403   -0.00891   -0.00103
C55   1    0.321319    0.970248    0.114797    11.00000    0.05267    0.03954 =
         0.05166    0.00481   -0.00600    0.00353
AFIX  23
H55A  3    0.391685    0.963337    0.101454    11.00000   -1.20000
H55B  3    0.324437    1.026185    0.157904    11.00000   -1.20000
AFIX   0
C56   1    0.253819    0.995421    0.056560    11.00000    0.04737    0.03328 =
         0.05411    0.00805    0.00059    0.00969
AFIX  23
H56A  3    0.184249    1.003165    0.071260    11.00000   -1.20000
H56B  3    0.282119    1.062360    0.049420    11.00000   -1.20000
AFIX   0
N57   4    0.246311    0.913232   -0.011795    11.00000    0.02680    0.03248 =
         0.04364    0.01600    0.00239    0.00489
C58   1    0.150660    0.920301   -0.056414    11.00000    0.03113    0.03941 =
         0.05285    0.02325   -0.00008    0.00784
AFIX  23
H58A  3    0.159597    0.890634   -0.105777    11.00000   -1.20000
H58B  3    0.139290    0.993674   -0.050302    11.00000   -1.20000
AFIX   0
C59   1    0.056228    0.860348   -0.035706    11.00000    0.03073    0.03796 =
         0.05019    0.01665    0.00036    0.00783
O60   5    0.075201    0.796647    0.001816    11.00000    0.02826    0.04688 =
         0.06210    0.03233    0.00369    0.00852
O61   5   -0.031770    0.874411   -0.056944    11.00000    0.02916    0.06026 =
         0.07950    0.03673   -0.00411    0.00868
O62   5    0.188472    0.675924   -0.124961    11.00000    0.08688    0.07463 =
         0.09528    0.00541    0.00610   -0.01274
AFIX   7
H62A  3    0.159587    0.717019   -0.152118    11.00000   -1.50000
H62B  3    0.136403    0.619718   -0.132926    11.00000   -1.50000
AFIX   0
C62   1    0.344031    0.914981   -0.046748    11.00000    0.03163    0.04202 =
         0.05412    0.02433    0.00707    0.00245
AFIX  23
H62C  3    0.381464    0.985237   -0.031600    11.00000   -1.20000
H62D  3    0.327123    0.898675   -0.097492    11.00000   -1.20000
AFIX   0
C63   1    0.413876    0.835831   -0.029332    11.00000    0.02972    0.03289 =
         0.04184    0.01139    0.00483    0.00303
O64   5    0.371231    0.762841   -0.005097    11.00000    0.02822    0.03545 =
         0.05541    0.01942    0.00797    0.00689
O65   5    0.506488    0.844081   -0.040962    11.00000    0.02937    0.05121 =
         0.07240    0.02362    0.01493    0.00464
N71   4   -0.034648    0.499449    0.117604    11.00000    0.02245    0.04042 =
         0.04686    0.01587    0.00657    0.00076
N72   4   -0.149432    0.608115    0.086348    11.00000    0.02338    0.05928 =
         0.07077    0.02916    0.01074    0.00969
AFIX  93
H72A  3   -0.198611    0.577713    0.104078    11.00000   -1.20000
H72B  3   -0.161699    0.658526    0.067319    11.00000   -1.20000
AFIX   0
C72   1   -0.054307    0.577141    0.088360    11.00000    0.02302    0.03914 =
         0.04123    0.01070    0.00264    0.00278
N73   4    0.018355    0.629321    0.059402    11.00000    0.02149    0.03879 =
         0.04756    0.01920    0.00354    0.00571
AFIX  43
H73   3    0.003121    0.678455    0.039911    11.00000   -1.20000
AFIX   0
C74   1    0.117018    0.600397    0.062536    11.00000    0.01867    0.03003 =
         0.03450    0.00900   -0.00092    0.00303
C75   1    0.144086    0.523177    0.094316    11.00000    0.01929    0.03188 =
         0.03268    0.01084    0.00176    0.00075
N76   4    0.077617    0.391972    0.151177    11.00000    0.02854    0.05005 =
         0.07341    0.03596    0.01146    0.00480
AFIX  93
H76A  3    0.026120    0.361841    0.167015    11.00000   -1.20000
H76B  3    0.138540    0.371292    0.154592    11.00000   -1.20000
AFIX   0
C76   1    0.063203    0.469680    0.121733    11.00000    0.02660    0.03587 =
         0.03647    0.01091    0.00273    0.00058
N77   4    0.249863    0.515578    0.087978    11.00000    0.02160    0.03308 =
         0.03826    0.01689    0.00447    0.00419
C78   1    0.277439    0.586025    0.052739    11.00000    0.01954    0.03443 =
         0.03844    0.01549    0.00394    0.00433
AFIX  43
H78   3    0.344955    0.596929    0.040419    11.00000   -1.20000
AFIX   0
N79   4    0.200086    0.640878    0.036028    11.00000    0.02091    0.03343 =
         0.03853    0.01627    0.00129    0.00358
HKLF 4


REM  C984.res in P-1
REM wR2 = 0.0986, GooF = S = 1.038, Restrained GooF = 1.038 for all data
REM R1 = 0.0354 for 9698 Fo > 4sig(Fo) and 0.0394 for all 10915 data
REM 742 parameters refined using 1 restraints

END

WGHT      0.0431      2.2294

REM Highest difference peak  0.462,  deepest hole -0.429,  1-sigma level  0.050
Q1    1  -0.1576  0.6994 -0.0133  11.00000  0.05    0.46
Q2    1   0.8053  0.7261  0.3290  11.00000  0.05    0.36
Q3    1   0.6816  0.8967  0.3223  11.00000  0.05    0.32
Q4    1   0.1492  0.6876 -0.1771  11.00000  0.05    0.32
Q5    1   0.2556  0.2808  0.0073  11.00000  0.05    0.30
Q6    1   0.6053  0.6177  0.5255  11.00000  0.05    0.28
Q7    1   0.6782  0.8378  0.3544  11.00000  0.05    0.27
Q8    1   0.3947  0.7183 -0.0115  11.00000  0.05    0.25
Q9    1   0.0952  0.8161  0.5542  11.00000  0.05    0.25
Q10   1   0.2820  0.4968  0.1039  11.00000  0.05    0.25
;
_shelx_res_checksum                90656
_shelx_hkl_file
;
  -2   0   0 1904.49 70.9448   1
   2   0   0 1987.78 70.7457   5
  -3   0   0 3773.32 137.093   1
   3   0   0 3767.32 136.661   5
  -4   0   0 110.161 5.80146   1
   4   0   0 104.781 4.99669   5
  -5   0   0 977.447 38.1210   1
   5   0   0 999.375 36.7746   5
  -6   0   0 52.4841 6.26053   1
   6   0   0 54.4487 3.39621   5
   6   0   0 56.0417 2.99224   5
  -7   0   0 2437.61 95.4587   1
  -8   0   0 1954.66 72.1288   2
  -9   0   0 672.559 25.5614   2
   9   0   0 699.748 26.0911   3
 -10   0   0 33.9924 2.40142   2
  10   0   0 34.8712 2.69834   3
 -11   0   0 4.52962 1.12949   2
  11   0   0 2.67095 1.18065   3
 -12   0   0 214.465 8.63770   2
  12   0   0 200.605 9.09294   3
 -13   0   0 14.8387 1.75796   2
  13   0   0 10.3182 1.78968   3
  14   0   0 263.147 10.8033   3
  15   0   0 131.107 5.68079   3
  15  -1   0 1.55261 0.76350   3
  14  -1   0 76.6560 4.13103   3
  13  -1   0 82.5002 4.58493   3
  12  -1   0 116.273 5.80127   3
 -12   1   0 113.057 5.23884   2
  11  -1   0 111.637 6.57489   3
 -11   1   0 89.5019 4.55074   2
  10  -1   0 1.97469 1.04524   3
 -10   1   0 -1.1532 0.90758   2
   9  -1   0 3.46166 1.04364   3
  -9   1   0 3.39625 1.04038   2
   8  -1   0 113.447 5.27786   3
   7  -1   0 1280.63 47.1002   3
   6  -1   0 1046.10 38.5063   3
  -5   1   0 741.513 28.5512   1
  -3   1   0 1534.85 56.3699   1
  -2   1   0 804.103 29.7720   1
  -2   1   0 801.852 29.6334   5
  -2   1   0 853.532 29.8900   1
   0  -1   0 32.8301 1.76037   1
   0   1   0 34.5927 1.76788   5
   1   1   0 502.465 18.9103   5
   1   1   0 495.005 19.0810   1
  -2  -1   0 289.039 12.0223   1
   2   1   0 295.490 11.8529   5
  -3  -1   0 762.292 28.8129   1
   3   1   0 723.915 28.3289   5
  -4  -1   0 194.498 9.54588   1
   4   1   0 201.705 9.06916   5
  -5  -1   0 211.171 10.6881   1
   5   1   0 205.809 9.64664   5
  -6  -1   0 187.020 11.0486   1
  -7  -1   0 154.353 6.68494   2
  -7  -1   0 183.485 12.6187   1
   7   1   0 169.899 8.28106   5
   7   1   0 169.011 7.01137   3
  -8  -1   0 53.3802 2.90152   2
   8   1   0 61.9991 3.30333   3
   9   1   0 78.6471 4.12812   3
 -10  -1   0 607.810 22.6707   2
  10   1   0 591.878 23.0602   3
  11   1   0 40.0728 2.97489   3
 -12  -1   0 8.64225 1.61034   2
  12   1   0 5.03410 1.30985   3
 -13  -1   0 -0.1475 0.85638   2
  13   1   0 -0.8074 0.88793   3
 -14  -1   0 23.3144 1.93528   2
  14   1   0 24.7028 2.00678   3
  15   1   0 15.9837 1.69973   3
  15  -2   0 11.4478 1.50140   3
  14  -2   0 8.75089 1.65106   3
  13  -2   0 -1.8147 0.77310   3
  12  -2   0 57.7939 3.74712   3
  11  -2   0 547.544 21.6933   3
  10  -2   0 78.5335 4.37839   3
   9  -2   0 309.173 12.5400   3
   8  -2   0 259.926 10.5707   3
   7  -2   0 568.318 21.4938   3
   6  -2   0 48.0033 2.64616   3
   1  -2   0 887.713 32.1466   1
   1  -2   0 857.236 32.1752   1
  -1   2   0 875.435 32.1506   5
   0  -2   0 91.8224 4.35107   1
   0   2   0 88.2580 4.34437   5
  -1  -2   0 24.6434 2.26604   1
   1   2   0 23.9579 2.23992   5
  -2  -2   0 711.909 27.6660   1
   2   2   0 710.247 27.5191   5
  -3  -2   0 1322.98 49.6721   1
   3   2   0 1289.40 49.2728   5
  -4  -2   0 2.55222 1.96116   1
   4   2   0 3.67792 1.59936   5
  -5  -2   0 138.923 8.66648   1
   5   2   0 150.622 8.06875   5
  -6  -2   0 129.701 8.95385   1
  -6  -2   0 106.740 4.72085   2
   6   2   0 109.051 7.06216   5
  -7  -2   0 25.0178 1.72872   2
  -7  -2   0 25.3700 6.49590   1
   7   2   0 21.4052 1.82660   3
   7   2   0 28.1994 4.17180   5
  -8  -2   0 38.7966 2.39880   2
   8   2   0 45.2209 5.12954   5
   8   2   0 41.7452 2.60076   3
  -9  -2   0 16.5736 1.71388   2
   9   2   0 17.5254 1.86544   3
 -10  -2   0 512.172 19.7665   2
  10   2   0 522.582 20.0931   3
 -11  -2   0 9.15462 1.66322   2
  11   2   0 11.9120 1.78520   3
 -12  -2   0 19.7964 1.99266   2
  12   2   0 17.1197 1.99546   3
 -13  -2   0 240.808 9.60594   2
  13   2   0 232.246 9.80887   3
 -14  -2   0 7.86253 1.53672   2
  14   2   0 6.05911 1.22625   3
  15  -3   0 82.8105 4.08507   3
  14  -3   0 39.2348 2.80275   3
  13  -3   0 156.318 7.30206   3
  12  -3   0 47.0815 3.38307   3
  11  -3   0 227.578 9.92879   3
  10  -3   0 37.2709 2.90201   3
   9  -3   0 213.752 8.91366   3
   9  -3   0 200.209 8.15827   4
   8  -3   0 548.266 20.8025   4
   8  -3   0 570.986 21.4218   3
   7  -3   0 7.18919 1.09460   4
   7  -3   0 6.98848 1.41489   3
   2  -3   0 3235.33 112.487   1
  -2   3   0 2972.91 112.611   5
   1  -3   0 1217.49 44.8806   5
   1  -3   0 1248.38 45.1665   1
  -1   3   0 1192.12 45.2235   5
   0  -3   0 1906.19 71.9982   1
   0  -3   0 1983.61 71.7711   1
  -1  -3   0 74.4981 4.49994   1
   1   3   0 67.8969 4.46279   5
  -2  -3   0 198.345 9.67438   1
   2   3   0 196.389 9.54284   5
  -3  -3   0 3527.68 130.966   1
   3   3   0 3569.03 130.767   5
  -4  -3   0 306.625 14.7162   1
   4   3   0 304.622 14.1553   5
  -5  -3   0 0.61980 2.67479   1
  -5  -3   0 0.07003 0.55311   2
   5   3   0 3.98511 2.48504   5
   6   3   0 2669.11 100.372   5
  -7  -3   0 1813.11 71.8130   1
   7   3   0 1845.21 69.4807   5
   7   3   0 1754.54 65.8493   3
  -8  -3   0 5.10430 1.06232   2
   8   3   0 3.74209 3.27229   5
   8   3   0 4.32622 0.99770   3
  -9  -3   0 18.1684 1.83634   2
   9   3   0 31.4223 6.64470   5
   9   3   0 18.1391 1.88416   3
 -10  -3   0 446.255 16.9387   2
  10   3   0 425.236 17.0353   3
 -11  -3   0 100.848 4.92883   2
  11   3   0 99.1069 4.98560   3
 -12  -3   0 137.719 6.05868   2
  12   3   0 126.960 6.10736   3
 -13  -3   0 221.677 8.84690   2
  13   3   0 208.078 8.79400   3
 -14  -3   0 352.024 13.4866   2
  15  -4   0 39.1342 2.44059   3
  14  -4   0 8.60212 1.57378   3
  13  -4   0 162.979 7.54313   3
  12  -4   0 265.152 11.3184   3
  11  -4   0 131.043 6.45128   3
  10  -4   0 44.5370 2.52719   4
  10  -4   0 42.7018 3.10470   3
   9  -4   0 65.6400 3.80889   3
   9  -4   0 67.0625 3.44351   4
   8  -4   0 207.430 8.26034   4
   8  -4   0 208.852 8.90172   3
   6  -4   0 5.80512 1.04413   4
   6  -4   0 3.40342 1.21734   3
   3  -4   0 228.505 8.66250   1
   3  -4   0 242.540 8.69610   1
  -3   4   0 211.194 9.54659   5
   2  -4   0 782.441 30.1812   1
   2  -4   0 802.694 30.0122   1
  -2   4   0 806.589 30.3890   5
   1  -4   0 307.171 13.4592   1
   1  -4   0 322.880 13.0967   1
  -1   4   0 307.611 13.5656   5
   0  -4   0 1067.30 42.2716   1
   0  -4   0 1105.31 41.8628   1
   0   4   0 1115.47 41.9541   5
  -1  -4   0 1512.80 56.1167   1
   1   4   0 1374.31 54.6819   5
  -2  -4   0 1.70913 1.74011   1
   2   4   0 2.83523 1.86560   5
  -3  -4   0 17.8571 3.18116   1
   3   4   0 15.4913 3.16983   5
  -4  -4   0 26.5672 1.71945   2
  -4  -4   0 26.5548 4.63840   1
   4   4   0 31.9544 4.22894   5
  -5  -4   0 69.2357 3.31829   2
  -5  -4   0 69.8931 6.93167   1
   5   4   0 76.5964 6.48052   5
   5   4   0 72.0536 3.18812   2
  -6  -4   0 20.6845 5.41684   1
  -6  -4   0 18.1479 1.54308   2
   6   4   0 19.3728 1.46421   2
   6   4   0 25.4030 4.59247   5
  -7  -4   0 13.6128 6.34269   1
  -7  -4   0 20.2145 2.55277   2
   7   4   0 19.8862 1.48190   2
   7   4   0 30.7072 8.50051   5
  -8  -4   0 14.7570 1.68630   2
  -8  -4   0 27.4155 10.0828   1
   8   4   0 14.3975 4.55989   5
   8   4   0 15.8944 1.75744   3
  -9  -4   0 130.947 6.02254   2
   9   4   0 133.993 6.06609   3
   9   4   0 136.578 10.5461   5
 -10  -4   0 81.1407 4.27231   2
 -11  -4   0 130.083 5.86428   2
  11   4   0 118.832 5.68254   3
 -12  -4   0 18.3801 2.02963   2
 -13  -4   0 25.6139 2.09472   2
 -14  -4   0 4.48450 0.87452   2
  14  -5   0 8.50581 1.52476   3
  13  -5   0 -0.4812 0.91635   3
  12  -5   0 95.9400 5.17812   3
  11  -5   0 2.66651 1.12338   3
  10  -5   0 128.705 5.58457   4
  10  -5   0 130.423 6.33523   3
   9  -5   0 198.799 8.07909   4
   9  -5   0 199.656 8.71782   3
   8  -5   0 0.71646 0.89458   3
   7  -5   0 97.9364 4.32858   4
   7  -5   0 96.7506 4.67692   3
   6  -5   0 46.0019 2.72249   3
   6  -5   0 48.7630 2.52316   4
   4  -5   0 15.4342 1.28748   4
  -4   5   0 18.8210 3.40505   5
   3  -5   0 165.123 7.24127   1
   3  -5   0 165.305 7.09744   1
  -3   5   0 163.300 8.21214   5
   2  -5   0 578.555 22.0311   1
   2  -5   0 562.223 22.4643   1
  -2   5   0 532.414 23.0949   5
   1  -5   0 304.237 14.3760   1
   1  -5   0 308.707 13.4493   1
  -1   5   0 315.103 13.9603   5
   0  -5   0 57.4190 4.45805   1
   0   5   0 56.4033 4.78202   5
  -1  -5   0 508.425 22.0621   1
   1   5   0 534.637 22.4716   5
  -2  -5   0 128.386 8.27340   1
   2   5   0 136.560 8.57461   5
  -3  -5   0 29.4299 4.37650   1
   3   5   0 23.7780 1.56230   2
   3   5   0 32.6496 4.66054   5
  -4  -5   0 346.222 17.6052   1
  -4  -5   0 340.643 13.2492   2
   4   5   0 337.544 13.1090   2
   4   5   0 376.171 17.5469   5
  -5  -5   0 507.333 18.8147   2
  -5  -5   0 501.646 24.0109   1
   5   5   0 488.451 18.5739   2
   5   5   0 499.625 23.3678   5
  -6  -5   0 191.614 7.95119   2
  -6  -5   0 206.406 13.8679   1
   6   5   0 193.081 7.72154   2
  -7  -5   0 146.963 6.38077   2
  -7  -5   0 149.395 15.1342   1
   7   5   0 151.083 6.16947   2
   7   5   0 140.490 10.9354   5
  -8  -5   0 231.630 20.2592   1
  -8  -5   0 227.196 9.14852   2
   8   5   0 223.855 14.2780   5
   8   5   0 208.608 8.64081   2
  -9  -5   0 135.061 6.38812   2
   9   5   0 134.046 11.7024   5
 -10  -5   0 312.083 12.6056   2
 -11  -5   0 12.0378 1.84493   2
 -12  -5   0 87.9388 4.41120   2
 -13  -5   0 60.1173 3.19616   2
  14  -6   0 153.841 6.76707   3
  13  -6   0 27.4714 2.42613   3
  12  -6   0 0.90006 0.95356   3
  11  -6   0 97.0164 4.52036   4
  11  -6   0 101.799 5.29739   3
  10  -6   0 93.9457 5.06568   3
   9  -6   0 194.202 7.92587   4
   9  -6   0 189.819 8.47406   3
   8  -6   0 5.73089 1.23800   3
   8  -6   0 5.06072 1.01588   4
   7  -6   0 731.933 27.3851   4
   7  -6   0 733.252 27.6166   3
   6  -6   0 1839.76 67.2779   3
   5  -6   0 15.8893 1.43828   4
   5  -6   0 17.8526 1.60997   3
   4  -6   0 461.439 16.9755   4
  -4   6   0 438.849 19.2642   5
   3  -6   0 1241.27 45.3400   1
   3  -6   0 1179.14 45.4940   1
   2  -6   0 1010.25 37.5688   1
   2  -6   0 916.429 35.5909   4
   2  -6   0 990.229 38.3467   1
  -2   6   0 974.996 38.4037   5
   1  -6   0 36.5233 9.08145   1
   1  -6   0 26.4594 3.35028   1
  -1   6   0 23.5636 4.15193   5
   0  -6   0 314.892 14.8167   1
   0   6   0 320.474 15.4505   5
  -1  -6   0 1048.77 41.3426   1
   1   6   0 984.699 37.6028   2
   1   6   0 1063.48 41.8701   5
  -2  -6   0 416.209 16.4057   2
  -2  -6   0 445.983 20.4762   1
   2   6   0 459.908 20.8632   5
  -3  -6   0 58.2733 6.48893   1
  -3  -6   0 57.1810 2.84386   2
   3   6   0 55.1043 6.13591   5
   3   6   0 56.0971 2.70562   2
  -4  -6   0 502.264 18.8784   2
  -4  -6   0 490.236 24.1254   1
   4   6   0 495.332 18.7154   2
   4   6   0 519.673 24.0460   5
  -5  -6   0 709.551 26.9818   2
   5   6   0 693.075 26.7466   2
   5   6   0 800.431 38.5520   5
  -6  -6   0 1249.25 54.1650   1
   6   6   0 1303.40 53.3821   5
   6   6   0 1273.70 46.6716   2
  -7  -6   0 72.5193 11.6163   1
  -7  -6   0 63.1728 3.48968   2
   7   6   0 56.7949 8.22911   5
   7   6   0 65.1287 3.21465   2
  -8  -6   0 873.741 45.8647   1
  -8  -6   0 981.619 35.0593   2
   8   6   0 936.096 41.3364   5
  -9  -6   0 148.434 6.64433   2
   9   6   0 138.238 13.0935   5
 -10  -6   0 2.03027 1.12323   2
  10   6   0 -10.836 12.5627   5
 -11  -6   0 31.7545 2.47893   2
 -12  -6   0 95.7808 4.59603   2
 -13  -6   0 236.343 9.44107   2
  14  -7   0 21.9446 1.78511   3
  13  -7   0 611.041 23.3788   3
  12  -7   0 169.786 7.76949   3
  11  -7   0 10.3606 1.43371   4
  11  -7   0 10.0885 1.88447   3
  10  -7   0 19.1465 2.21102   3
  10  -7   0 22.3211 1.88115   4
   9  -7   0 256.327 10.3262   4
   9  -7   0 257.853 10.8442   3
   8  -7   0 1194.32 43.5360   3
   8  -7   0 1142.95 43.0629   4
   7  -7   0 9.98300 1.37608   4
   7  -7   0 9.80006 1.53696   3
   6  -7   0 726.816 27.6296   3
   6  -7   0 746.920 27.4694   4
   5  -7   0 1484.33 55.0340   3
   4  -7   0 378.028 14.4318   4
   3  -7   0 379.322 14.8040   4
   3  -7   0 396.544 17.1145   1
   3  -7   0 405.984 16.3781   1
  -3   7   0 377.979 18.2514   5
   2  -7   0 97.7834 6.16978   1
   2  -7   0 81.3113 9.37886   1
   2  -7   0 87.2245 3.94093   4
  -2   7   0 80.6648 7.60119   5
   1  -7   0 108.086 7.10789   1
   1  -7   0 101.956 4.48244   4
  -1   7   0 117.116 9.73960   5
  -1   7   0 101.422 4.35194   2
   0  -7   0 1171.57 43.9629   1
   0  -7   0 1054.02 39.8631   4
   0   7   0 1132.78 44.5775   5
   0   7   0 1012.86 39.9822   2
  -1  -7   0 4.26584 0.86591   4
  -1  -7   0 2.92629 2.80325   1
   1   7   0 4.16386 0.85410   2
   1   7   0 5.09517 3.48798   5
  -2  -7   0 462.118 17.7222   2
   2   7   0 488.688 23.0047   5
   2   7   0 468.960 17.6534   2
  -3  -7   0 107.435 9.31767   1
  -3  -7   0 101.969 4.62177   2
   3   7   0 106.223 8.99368   5
   3   7   0 104.289 4.52830   2
  -4  -7   0 682.276 32.7440   1
  -4  -7   0 701.835 26.8700   2
   4   7   0 693.596 32.8097   5
   4   7   0 791.218 26.9997   2
  -5  -7   0 865.577 31.5324   2
  -5  -7   0 838.078 38.6029   1
   5   7   0 838.765 31.2683   2
   5   7   0 839.052 38.1240   5
  -6  -7   0 155.110 14.9311   1
  -6  -7   0 175.124 7.36241   2
   6   7   0 169.398 13.0695   5
   6   7   0 172.466 7.05882   2
  -7  -7   0 355.407 13.6397   2
   7   7   0 322.096 20.0831   5
   7   7   0 340.767 13.2174   2
  -8  -7   0 41.3438 2.91426   2
   8   7   0 44.1186 2.77223   2
   8   7   0 38.0437 9.43317   5
  -9  -7   0 112.823 5.48395   2
   9   7   0 117.544 13.5617   5
 -10  -7   0 13.5278 1.90100   2
 -11  -7   0 8.23430 1.63278   2
 -12  -7   0 17.9888 1.66978   2
  13  -8   0 1.60091 0.79592   3
  12  -8   0 73.1968 4.50107   4
  12  -8   0 97.2886 4.58556   3
  11  -8   0 92.2136 5.21377   3
  10  -8   0 162.602 7.31849   3
  10  -8   0 154.331 6.76324   4
   9  -8   0 2.35334 1.20112   3
   9  -8   0 2.27901 0.93484   4
   8  -8   0 308.852 12.5466   3
   8  -8   0 308.363 12.2303   4
   7  -8   0 271.565 11.3872   3
   7  -8   0 292.120 11.2747   4
   6  -8   0 4.32189 1.04019   3
   6  -8   0 1.72023 0.80646   4
   5  -8   0 17.5218 1.65433   4
   4  -8   0 145.692 6.17173   4
   3  -8   0 305.925 12.0688   4
   3  -8   0 304.155 15.5720   1
   3  -8   0 318.385 14.0397   1
  -3   8   0 314.957 17.1366   5
   2  -8   0 333.093 12.7790   4
   2  -8   0 342.026 15.6491   1
  -2   8   0 318.445 12.5623   2
  -2   8   0 335.613 17.5405   5
   1  -8   0 256.359 13.2757   1
   1  -8   0 244.822 9.75860   4
  -1   8   0 254.557 14.7641   5
  -1   8   0 244.759 9.63021   2
   0  -8   0 2.99187 2.83015   1
   0   8   0 3.02113 3.88591   5
  -1  -8   0 1015.79 34.4088   2
  -1  -8   0 885.903 34.1452   4
  -1  -8   0 928.551 39.3114   1
   1   8   0 895.585 34.1546   2
   1   8   0 920.023 40.0781   5
  -2  -8   0 486.958 18.2621   2
  -2  -8   0 482.644 18.1256   4
  -2  -8   0 471.148 23.6314   1
   2   8   0 497.028 24.6372   5
  -3  -8   0 14.2314 4.90496   1
  -3  -8   0 15.4727 2.24765   2
   3   8   0 19.3505 5.57254   5
   3   8   0 19.1219 1.68527   2
  -4  -8   0 1320.90 48.0887   2
  -4  -8   0 1291.09 55.4566   1
   4   8   0 1307.74 55.6668   5
  -5  -8   0 116.728 12.4834   1
  -5  -8   0 139.473 6.00753   2
   5   8   0 136.675 5.76796   2
   5   8   0 119.910 11.9229   5
  -6  -8   0 130.270 5.94446   2
  -6  -8   0 118.728 14.9525   1
   6   8   0 133.242 5.71661   2
   6   8   0 130.149 12.8267   5
  -7  -8   0 93.6591 17.8973   1
  -7  -8   0 84.3688 4.42738   2
   7   8   0 87.3027 4.15729   2
   7   8   0 91.5854 11.5016   5
  -8  -8   0 0.57496 0.92454   2
   8   8   0 0.32308 0.85484   2
   8   8   0 -4.3140 6.41452   5
  -9  -8   0 58.1156 3.43217   2
 -10  -8   0 45.0854 2.84653   2
 -11  -8   0 24.1226 1.97287   2
 -12  -8   0 72.8145 3.39917   2
  12  -9   0 0.08396 0.69425   4
  12  -9   0 2.33181 0.90474   3
  11  -9   0 0.88148 0.69570   4
  11  -9   0 2.30335 0.95808   3
  10  -9   0 27.7112 2.08931   4
   9  -9   0 12.0473 1.60565   4
   9  -9   0 17.5161 1.99881   3
   8  -9   0 4.46410 1.12250   4
   8  -9   0 5.16786 1.23543   3
   6  -9   0 83.3368 4.15643   4
   5  -9   0 43.1401 2.66397   4
   4  -9   0 55.2317 2.96726   4
  -4   9   0 49.4451 2.68215   2
   3  -9   0 107.708 4.88668   4
   3  -9   0 112.049 7.33018   1
  -3   9   0 104.846 4.62552   2
   2  -9   0 258.796 10.1378   4
   2  -9   0 254.005 13.4659   1
  -2   9   0 252.123 9.91132   2
  -2   9   0 252.552 16.9637   5
   1  -9   0 393.533 14.6297   4
   1  -9   0 381.358 18.7701   1
  -1   9   0 371.086 20.9254   5
  -1   9   0 372.084 14.6742   2
   0  -9   0 1393.72 52.8601   4
   0  -9   0 1447.42 57.8369   1
   0   9   0 1466.10 52.4927   2
  -1  -9   0 278.192 16.4708   1
  -1  -9   0 282.677 11.1580   4
   1   9   0 290.073 17.8693   5
   1   9   0 282.207 11.0536   2
  -2  -9   0 167.550 12.7026   1
  -2  -9   0 163.860 6.72092   4
  -2  -9   0 163.923 6.86674   2
   2   9   0 168.772 6.88006   2
   2   9   0 158.267 13.3536   5
  -3  -9   0 57.8271 3.14472   2
  -3  -9   0 55.7344 9.35381   1
   3   9   0 48.9831 9.30812   5
   3   9   0 55.7368 3.04005   2
  -4  -9   0 83.9648 11.1429   1
  -4  -9   0 60.0659 3.35310   2
   4   9   0 51.2450 9.99170   5
   4   9   0 61.5676 3.27883   2
  -5  -9   0 188.633 7.72631   2
  -5  -9   0 163.723 16.1223   1
   5   9   0 173.950 15.0921   5
  -6  -9   0 -7.0655 10.0495   1
  -6  -9   0 1.36166 0.94549   2
   6   9   0 2.62324 0.91922   2
   6   9   0 -1.0791 6.37911   5
  -7  -9   0 94.2099 4.73493   2
   7   9   0 87.2302 13.0535   5
   7   9   0 97.5656 4.49190   2
  -8  -9   0 10.7097 1.74935   2
   8   9   0 9.27503 1.46396   2
  -9  -9   0 0.24439 0.82559   2
   9   9   0 -1.9277 1.32875   2
 -10  -9   0 6.86604 1.37982   2
 -11  -9   0 55.4713 2.82360   2
  12 -10   0 38.7982 2.34328   4
  11 -10   0 24.4427 1.79813   4
  10 -10   0 3.10361 0.86691   4
   9 -10   0 2.40319 0.83993   4
   8 -10   0 39.0817 2.56117   4
   7 -10   0 457.612 17.6725   4
   6 -10   0 450.130 17.4050   4
   5 -10   0 1.26962 0.93191   4
   4 -10   0 0.85608 0.77786   4
  -4  10   0 0.69650 0.80520   2
   3 -10   0 33.2477 2.31257   4
   3 -10   0 35.7814 5.64514   1
  -3  10   0 34.3157 2.16721   2
   2 -10   0 414.199 19.5954   1
   2 -10   0 388.209 14.9553   4
  -2  10   0 363.577 24.2464   5
  -2  10   0 375.446 14.7080   2
   1 -10   0 193.109 7.82914   4
  -1  10   0 188.213 7.70925   2
  -1  10   0 182.401 16.3772   5
   0 -10   0 0.60474 0.69522   4
   0 -10   0 1.67514 4.06493   1
   0  10   0 0.75355 0.78939   2
   0  10   0 3.63293 6.64830   5
  -1 -10   0 763.445 35.0597   1
  -1 -10   0 773.109 28.3341   4
   1  10   0 733.457 36.6710   5
   1  10   0 771.125 28.3908   2
  -2 -10   0 443.833 24.4634   1
   2  10   0 458.964 17.2299   2
   2  10   0 443.956 25.6507   5
  -3 -10   0 27.5738 2.19391   2
  -3 -10   0 27.3637 7.84122   1
   3  10   0 28.1293 10.2728   5
  -4 -10   0 8.51080 7.39350   1
  -4 -10   0 13.1822 1.81510   2
   4  10   0 13.1681 7.54206   5
  -5 -10   0 20.0716 9.66782   1
  -5 -10   0 24.5424 2.14029   2
   5  10   0 25.6640 2.09182   2
   5  10   0 9.62838 7.34930   5
  -6 -10   0 89.6151 4.54933   2
   6  10   0 117.007 20.2355   5
   6  10   0 98.1369 4.53563   2
  -7 -10   0 40.4710 2.70918   2
   7  10   0 43.2950 2.60571   2
  -8 -10   0 42.6709 2.65741   2
  -9 -10   0 10.4788 1.41305   2
 -10 -10   0 44.8239 2.40754   2
  11 -11   0 12.2155 1.26192   4
  10 -11   0 9.31555 1.30092   4
   9 -11   0 50.3654 2.85574   4
   8 -11   0 7.11550 1.35964   4
   7 -11   0 207.645 8.67489   4
   6 -11   0 0.98921 0.87227   4
   5 -11   0 0.46914 0.77685   4
   4 -11   0 59.0277 3.27041   4
  -4  11   0 53.4120 3.01002   2
   3 -11   0 4.26475 1.08728   4
   2 -11   0 61.9612 3.45588   4
   2 -11   0 61.5231 8.91168   1
   1 -11   0 36.8303 8.29600   1
  -1  11   0 22.7743 11.1620   5
   0 -11   0 50.5827 9.53389   1
   0  11   0 78.4478 20.5061   5
   0  11   0 57.3427 3.12104   2
  -1 -11   0 52.3107 10.1887   1
  -1 -11   0 52.4019 3.82702   4
   1  11   0 64.3922 3.26157   2
   1  11   0 51.0281 13.9201   5
   2  11   0 15.6086 8.47919   5
   2  11   0 26.1783 2.06212   2
  -3 -11   0 57.6183 13.3006   1
   3  11   0 66.3038 13.3716   5
   3  11   0 88.8111 4.13527   2
   4  11   0 173.593 7.35694   2
   5  11   0 2.98382 1.03502   2
  -6 -11   0 16.2122 1.74544   2
   6  11   0 13.6392 2.64454   2
  -7 -11   0 2.83355 1.31638   2
   7  11   0 2.38636 0.83928   2
  -8 -11   0 7.18519 1.34554   2
  10 -12   0 34.9247 2.04984   4
   9 -12   0 1.83099 0.71006   4
   8 -12   0 2.22083 0.75286   4
   6 -12   0 1.21806 0.76483   4
   5 -12   0 0.41403 0.77453   4
   4 -12   0 79.0647 3.91060   4
  -4  12   0 72.9616 3.59927   2
   3 -12   0 216.506 8.59879   4
  -3  12   0 197.818 8.30380   2
   2 -12   0 26.6792 2.02459   4
  -2  12   0 28.6300 2.06525   2
   1 -12   0 116.081 5.23264   4
  -1  12   0 119.450 5.26046   2
   0  12   0 15.3608 18.6400   5
   1  12   0 102.815 19.8743   5
   1  12   0 78.0233 3.95434   2
   2  12   0 115.486 24.3404   5
   2  12   0 103.749 4.87380   2
   3  12   0 44.6189 2.76282   2
   4  12   0 53.8161 3.04137   2
   5  12   0 16.0977 1.73975   2
   6  12   0 42.2567 2.50031   2
   9 -13   0 0.39248 0.44486   4
   8 -13   0 87.2596 3.99704   4
   7 -13   0 105.076 4.72749   4
   6 -13   0 2.79492 0.75729   4
   5 -13   0 179.776 7.48260   4
   4 -13   0 124.252 5.50252   4
  -4  13   0 124.247 5.25858   2
  -3  13   0 100.440 4.46740   2
   2 -13   0 103.457 5.11517   4
  -2  13   0 101.198 5.34311   2
   1 -13   0 35.2166 2.17863   4
   0 -13   0 232.400 9.11402   4
   1  13   0 22.3868 2.85277   2
   2  13   0 23.7429 1.96975   2
   3  13   0 4.50859 1.02556   2
   4  13   0 60.4342 3.09784   2
   5  13   0 75.7202 3.56437   2
   7 -14   0 15.6086 1.27522   4
   5 -14   0 41.6431 2.33186   4
   4 -14   0 81.9490 3.77911   4
   3 -14   0 28.6239 1.82518   4
   2 -14   0 16.0393 1.63647   4
  -2  14   0 20.4306 1.59831   2
   1 -14   0 7.10082 1.12630   4
  -1  14   0 7.01039 1.24617   2
   0  14   0 37.4598 2.22160   2
   1  14   0 -0.1388 0.68258   2
   2  14   0 2.16315 0.73296   2
   3  14   0 1.80539 0.75869   2
   4  14   0 0.68759 0.59868   2
   4 -15   0 31.0033 1.85683   4
  -2  15   0 2.58754 0.88250   2
  -1  15   0 64.0537 2.95118   2
   0  15   0 7.61464 1.07651   2
   1  15   0 12.6543 1.23528   2
   2  15  -1 6.24516 1.15479   2
   1  15  -1 67.0379 3.07314   2
  -1  15  -1 1.93876 0.68751   2
  -2  15  -1 1.13514 0.68044   2
   3 -15   1 1.95036 0.63515   4
   4 -15   1 8.61297 0.97866   4
   5  14  -1 -0.2177 0.68791   2
   4  14  -1 64.3309 3.34322   2
   3  14  -1 182.341 7.34251   2
   2  14  -1 0.29594 0.68443   2
   1  14  -1 49.3617 2.70349   2
   0  14  -1 0.37953 0.67427   2
  -1  14  -1 5.43391 0.95558   2
  -2  14  -1 25.2484 1.80049   2
   2 -14   1 25.4428 1.75357   4
   3 -14   1 11.5898 1.30145   4
   4 -14   1 232.246 9.22450   4
   5 -14   1 124.392 5.34451   4
   6 -14   1 0.07425 0.56973   4
   7 -14   1 0.70869 0.56330   4
   6  13  -1 13.8661 1.37307   2
   5  13  -1 3.11383 0.80593   2
   4  13  -1 34.8680 2.23848   2
   3  13  -1 31.4220 2.20206   2
   1  13  -1 3.49629 1.01382   2
   0  13  -1 40.2600 2.50862   2
   0 -13   1 38.4755 2.27279   4
  -1  13  -1 15.7307 1.63218   2
  -2  13  -1 1.35702 1.16755   2
   2 -13   1 0.81678 0.65070   4
  -3  13  -1 71.0450 3.57193   2
   3 -13   1 79.3405 3.85498   4
  -4  13  -1 0.79443 0.79213   2
   4 -13   1 0.21605 0.95121   4
   5 -13   1 79.0130 3.90981   4
   6 -13   1 2.24569 0.83547   4
   7 -13   1 12.1041 1.41230   4
   8 -13   1 11.8958 1.27119   4
   9 -13   1 6.02362 0.95132   4
   6  12  -1 144.088 6.06139   2
   5  12  -1 12.1121 1.59463   2
   4  12  -1 4.77074 1.12387   2
   3  12  -1 70.3843 3.67266   2
   2  12  -1 14.0077 1.76805   2
   2  12  -1 24.3982 10.8272   5
   1  12  -1 314.860 11.9180   2
  -1 -12   1 287.844 11.6254   4
   0  12  -1 5.98790 12.4861   5
   0  12  -1 1.15880 0.83996   2
   0 -12   1 0.07507 0.63736   4
  -1  12  -1 79.8615 3.86017   2
   1 -12   1 89.9228 16.7779   1
   1 -12   1 74.7979 3.81660   4
  -2  12  -1 18.8918 1.75132   2
   2 -12   1 19.0327 1.81182   4
  -3  12  -1 57.2752 3.05904   2
   3 -12   1 57.9523 3.23448   4
  -4  12  -1 0.94047 0.84430   2
   4 -12   1 0.32949 0.77612   4
   5 -12   1 0.38446 0.75315   4
   6 -12   1 86.0566 4.27366   4
   7 -12   1 3.10458 0.99683   4
   8 -12   1 6.83256 1.26929   4
   9 -12   1 7.31459 1.20810   4
  10 -12   1 13.1286 1.39125   4
  -9 -11   1 2.97299 0.79579   2
  -8 -11   1 33.8220 3.07204   2
   7  11  -1 -0.3172 0.76975   2
  -7 -11   1 0.93162 0.87101   2
   6  11  -1 1.51109 0.88105   2
  -6 -11   1 1.22297 0.95030   2
   5  11  -1 8.87083 9.45653   5
   5  11  -1 7.26123 1.26062   2
  -5 -11   1 4.13534 1.10905   2
   4  11  -1 108.496 14.8169   5
   4  11  -1 115.101 5.07376   2
  -4 -11   1 102.876 4.97904   2
   3  11  -1 161.739 16.2827   5
   3  11  -1 154.464 6.53890   2
  -3 -11   1 128.937 15.2354   1
   2  11  -1 158.413 16.0778   5
   2  11  -1 159.870 6.75670   2
  -2 -11   1 149.931 14.6287   1
   1  11  -1 252.235 9.64328   2
   1  11  -1 224.362 18.9493   5
  -1 -11   1 229.344 10.5613   4
  -1 -11   1 230.853 16.5250   1
   0  11  -1 6.83620 9.65740   5
   0 -11   1 -0.1134 5.23004   1
   0 -11   1 3.95694 0.94525   4
  -1  11  -1 1.50793 0.89480   2
  -1  11  -1 9.56783 11.2169   5
   1 -11   1 2.55191 0.88148   4
   1 -11   1 5.72063 5.30352   1
  -2  11  -1 18.3855 1.68040   2
   2 -11   1 16.9962 5.40938   1
  -3  11  -1 356.320 13.6102   2
   3 -11   1 350.081 13.8774   4
   4 -11   1 680.797 25.7099   4
   5 -11   1 2.97265 0.97643   4
   6 -11   1 180.621 7.73226   4
   7 -11   1 155.360 6.79944   4
   8 -11   1 16.2326 1.70451   4
   9 -11   1 15.5365 1.59764   4
  10 -11   1 12.2232 1.40129   4
  11 -11   1 141.339 5.84778   4
 -10 -10   1 74.2312 3.49300   2
  -9 -10   1 37.3442 2.38661   2
  -8 -10   1 138.060 6.08686   2
   7  10  -1 115.314 5.11627   2
  -7 -10   1 112.210 5.28886   2
   6  10  -1 28.1415 2.22662   2
   6  10  -1 35.8706 9.96474   5
  -6 -10   1 27.3596 2.29542   2
   5  10  -1 46.4889 2.73795   2
   5  10  -1 41.9655 11.1070   5
  -5 -10   1 23.8886 12.9039   1
  -5 -10   1 41.6376 2.76893   2
   4  10  -1 0.46657 5.79213   5
   4  10  -1 3.49496 1.04659   2
  -4 -10   1 -2.6114 6.87659   1
  -4 -10   1 0.57411 1.45857   2
   3  10  -1 588.580 21.8382   2
   3  10  -1 572.484 30.4773   5
  -3 -10   1 579.243 21.7779   2
  -3 -10   1 566.185 29.9135   1
   2  10  -1 496.876 18.0255   2
   2  10  -1 459.193 26.0420   5
  -2 -10   1 461.906 17.7901   4
  -2 -10   1 460.780 25.1737   1
   1  10  -1 76.0201 3.72183   2
   1  10  -1 57.2017 10.3884   5
  -1 -10   1 80.1262 9.37753   1
  -1 -10   1 74.9072 3.64644   4
   0  10  -1 184.721 7.43806   2
   0  10  -1 175.715 15.1359   5
   0 -10   1 176.848 7.42550   4
  -1  10  -1 245.011 9.76452   2
  -1  10  -1 245.903 18.4757   5
   1 -10   1 253.198 9.92638   4
   1 -10   1 240.292 14.4115   1
  -2  10  -1 55.4133 2.98555   2
   2 -10   1 59.3889 3.21292   4
   2 -10   1 66.1641 7.16322   1
  -3  10  -1 19.6111 1.73820   2
   3 -10   1 23.1733 5.30993   1
   3 -10   1 25.1894 1.97986   4
  -4  10  -1 55.7298 2.92289   2
   4 -10   1 57.8089 3.21115   4
   5 -10   1 339.493 13.4153   4
   6 -10   1 -0.1026 0.76871   4
   7 -10   1 226.316 9.38172   4
   8 -10   1 84.2309 4.20575   4
   9 -10   1 88.7330 4.32869   4
  10 -10   1 38.6975 2.43306   4
  11 -10   1 -0.0517 0.54582   4
  12 -10   1 53.2614 3.08708   4
 -11  -9   1 84.3656 4.18469   2
 -10  -9   1 1.11254 0.81779   2
   9   9  -1 1.16125 0.96807   2
  -9  -9   1 7.25189 1.72610   2
   8   9  -1 30.8791 10.0724   5
   8   9  -1 44.6539 2.59886   2
  -8  -9   1 46.2088 2.96388   2
   7   9  -1 254.049 10.3466   2
   7   9  -1 253.076 18.5200   5
  -7  -9   1 269.490 10.6989   2
   6   9  -1 12.8607 6.04809   5
   6   9  -1 21.2470 1.89355   2
  -6  -9   1 21.9772 2.03929   2
  -6  -9   1 22.0116 11.0296   1
   5   9  -1 583.033 34.2283   5
   5   9  -1 479.531 18.5838   2
  -5  -9   1 449.228 27.1078   1
  -5  -9   1 485.625 18.7642   2
   4   9  -1 31.6944 8.32753   5
   4   9  -1 27.0419 2.07434   2
  -4  -9   1 26.6951 9.55696   1
  -4  -9   1 25.8120 2.15022   2
   3   9  -1 2.50115 0.96034   2
   3   9  -1 1.09980 5.51866   5
  -3  -9   1 3.84813 4.84936   1
  -3  -9   1 2.69431 0.99578   2
   2   9  -1 248.380 16.3287   5
   2   9  -1 238.759 9.19157   2
  -2  -9   1 224.448 9.02877   4
  -2  -9   1 207.003 14.6270   1
  -2  -9   1 226.723 9.12433   2
   1   9  -1 94.8806 4.20887   2
   1   9  -1 86.2168 10.1360   5
  -1  -9   1 93.3011 8.93262   1
  -1  -9   1 89.0818 4.14593   4
   0   9  -1 251.018 9.68788   2
   0   9  -1 241.067 15.7295   5
   0  -9   1 242.051 14.2760   1
  -1   9  -1 150.349 12.4658   5
  -1   9  -1 140.169 6.28033   2
   1  -9   1 133.863 9.53389   1
   1  -9   1 133.641 5.86878   4
  -2   9  -1 26.2013 1.82185   2
  -2   9  -1 29.2361 7.11289   5
   2  -9   1 26.5927 1.95948   4
   2  -9   1 31.7717 4.82699   1
  -3   9  -1 110.572 4.95792   2
   3  -9   1 115.809 5.21493   4
   3  -9   1 128.159 7.55018   1
  -4   9  -1 0.69838 0.83241   2
   4  -9   1 0.60035 0.78208   4
   5  -9   1 190.501 7.97733   4
   6  -9   1 53.2225 3.05485   4
   7  -9   1 1216.37 44.4146   3
   7  -9   1 1163.74 43.9904   4
   8  -9   1 212.325 8.57987   4
   8  -9   1 195.590 8.65359   3
   9  -9   1 3.20251 0.94438   4
   9  -9   1 3.32333 1.08393   3
  10  -9   1 42.2906 3.21960   3
  10  -9   1 37.9994 2.49546   4
  11  -9   1 16.9057 1.60221   4
  11  -9   1 17.3420 1.95242   3
  12  -9   1 28.5000 1.99720   4
  12  -9   1 37.3873 2.53221   3
 -12  -8   1 47.9408 2.57087   2
 -11  -8   1 8.75240 1.46359   2
 -10  -8   1 21.9635 2.19197   2
  -9  -8   1 38.9431 2.74022   2
   8   8  -1 377.467 23.2958   5
   8   8  -1 404.370 15.6544   2
  -8  -8   1 435.828 16.1882   2
   7   8  -1 34.1570 7.77677   5
   7   8  -1 47.5919 3.17093   2
  -7  -8   1 37.1697 2.78456   2
   6   8  -1 35.4164 8.46087   5
   6   8  -1 43.5199 2.61337   2
  -6  -8   1 44.4816 2.83309   2
  -6  -8   1 48.1972 11.0417   1
   5   8  -1 24.1062 1.90861   2
   5   8  -1 14.5759 5.30926   5
  -5  -8   1 24.8717 2.06372   2
  -5  -8   1 16.8205 6.58852   1
   4   8  -1 586.906 28.4128   5
   4   8  -1 538.770 21.0758   2
  -4  -8   1 543.825 28.1752   1
  -4  -8   1 582.564 21.2989   2
   3   8  -1 288.732 17.5473   5
   3   8  -1 297.849 11.5724   2
  -3  -8   1 295.621 17.6888   1
  -3  -8   1 303.961 11.6697   2
   2   8  -1 1050.92 44.2400   5
   2   8  -1 1131.50 38.5084   2
  -2  -8   1 1011.37 43.6023   1
  -2  -8   1 956.413 37.6896   4
  -2  -8   1 1000.38 37.8155   2
   1   8  -1 190.119 12.3613   5
   1   8  -1 179.547 7.17549   2
  -1  -8   1 181.301 11.5904   1
  -1  -8   1 172.470 7.13183   2
  -1  -8   1 172.518 7.14413   4
   0   8  -1 52.9288 6.81315   5
   0   8  -1 55.4987 2.71493   2
   0  -8   1 51.7563 2.73780   4
   0  -8   1 55.8131 5.93798   1
  -1   8  -1 232.659 13.9935   5
  -1   8  -1 227.210 9.24662   2
   1  -8   1 259.262 12.9837   1
   1  -8   1 240.434 9.43300   4
  -2   8  -1 583.260 22.0687   2
  -2   8  -1 597.636 26.8742   5
   2  -8   1 588.828 22.2812   4
   2  -8   1 614.698 25.1745   1
  -3   8  -1 1293.16 53.9347   5
  -3   8  -1 1417.77 49.7639   2
   3  -8   1 1370.22 49.8979   4
   3  -8   1 1357.70 52.4644   1
   4  -8   1 46.1753 2.61272   4
   5  -8   1 797.432 29.6967   4
   6  -8   1 71.6619 3.52031   4
   6  -8   1 63.1479 3.51691   3
   7  -8   1 -0.0490 0.76452   4
   7  -8   1 0.62622 0.85561   3
   8  -8   1 36.9607 2.80043   3
   8  -8   1 38.4190 2.54778   4
   9  -8   1 90.4776 4.82499   3
   9  -8   1 93.7781 4.47788   4
  10  -8   1 187.678 8.38357   3
  10  -8   1 190.482 7.89442   4
  11  -8   1 157.432 7.21310   3
  12  -8   1 70.1789 3.94822   3
  13  -8   1 30.9072 2.30335   3
 -12  -7   1 91.0594 4.30054   2
 -11  -7   1 122.080 5.63964   2
 -10  -7   1 28.5844 2.41354   2
   9   7  -1 336.495 21.1540   5
  -9  -7   1 390.069 14.7619   2
   8   7  -1 407.597 23.3582   5
  -8  -7   1 449.120 16.9882   2
   7   7  -1 19.1287 5.59291   5
   7   7  -1 21.3722 1.87439   2
  -7  -7   1 25.7992 10.4575   1
  -7  -7   1 21.9456 2.14527   2
   6   7  -1 31.9939 2.11318   2
   6   7  -1 29.0169 7.29405   5
  -6  -7   1 35.7652 2.40868   2
  -6  -7   1 18.2508 6.99541   1
   5   7  -1 2.79548 0.92584   2
   5   7  -1 4.09114 3.90028   5
  -5  -7   1 4.81450 5.26750   1
  -5  -7   1 3.48772 1.04691   2
   3   7  -1 2233.65 85.9161   5
  -3  -7   1 2167.92 85.6746   1
   2   7  -1 519.650 23.8451   5
   2   7  -1 489.660 18.7333   2
  -2  -7   1 496.779 23.4619   1
  -2  -7   1 504.875 18.8071   2
   1   7  -1 2599.51 95.6473   5
  -1  -7   1 2337.23 90.6308   4
  -1  -7   1 2577.97 95.3131   1
   0   7  -1 430.156 20.8622   5
   0   7  -1 467.282 17.1834   2
   0  -7   1 439.148 17.0996   4
   0  -7   1 490.084 20.9053   1
  -1   7  -1 392.472 18.6610   5
   1  -7   1 390.112 15.1941   4
   1  -7   1 421.249 18.0925   1
   1  -7   1 391.146 22.2091   1
  -2   7  -1 155.252 9.74796   5
   2  -7   1 157.762 10.9487   1
   2  -7   1 148.592 6.29730   4
   2  -7   1 158.256 8.41691   1
  -3   7  -1 258.542 14.0004   5
   3  -7   1 298.788 13.1317   1
   3  -7   1 269.794 10.8771   4
   3  -7   1 294.290 12.3521   1
   4  -7   1 841.679 31.1286   4
   5  -7   1 22.2057 1.75434   4
   5  -7   1 21.7109 1.97530   3
   6  -7   1 377.066 14.2946   4
   6  -7   1 364.286 14.4188   3
   7  -7   1 505.655 19.0723   4
   7  -7   1 498.449 19.3016   3
   8  -7   1 316.659 13.0757   3
   8  -7   1 331.861 12.7547   4
   9  -7   1 578.329 22.2110   4
   9  -7   1 598.026 22.7688   3
  10  -7   1 1.93280 0.85367   4
  10  -7   1 0.95598 1.19250   3
  11  -7   1 408.597 16.3196   3
  11  -7   1 403.678 15.5453   4
  12  -7   1 58.3532 3.79650   3
  13  -7   1 280.030 11.4775   3
  14  -7   1 31.5164 2.16693   3
 -13  -6   1 68.5364 3.62275   2
 -12  -6   1 25.8348 2.17065   2
 -11  -6   1 9.61424 1.71247   2
 -10  -6   1 79.2471 4.25836   2
   9   6  -1 57.5364 9.89164   5
  -9  -6   1 57.0126 3.47241   2
   8   6  -1 77.6581 9.90767   5
   8   6  -1 82.1966 3.88022   2
  -8  -6   1 85.2818 4.31022   2
  -8  -6   1 73.9852 17.6715   1
   7   6  -1 18.8105 1.64763   2
   7   6  -1 11.1612 4.88983   5
  -7  -6   1 22.7186 1.90138   2
  -7  -6   1 17.8416 8.52441   1
   6   6  -1 300.657 17.3174   5
   6   6  -1 321.675 11.9271   2
  -6  -6   1 295.442 11.9997   2
  -6  -6   1 298.005 18.9229   1
   5   6  -1 86.0492 8.53361   5
   5   6  -1 87.5352 3.92820   2
  -5  -6   1 83.4069 4.08134   2
  -5  -6   1 95.1687 8.95930   1
   4   6  -1 194.952 7.76424   2
   4   6  -1 200.984 12.3057   5
  -4  -6   1 192.136 7.87464   2
  -4  -6   1 200.815 12.6193   1
   3   6  -1 196.404 11.8234   5
   3   6  -1 196.165 7.79967   2
  -3  -6   1 196.732 7.91152   2
  -3  -6   1 210.857 12.3134   1
   2   6  -1 11.5869 3.35987   5
   2   6  -1 5.99826 1.07908   2
  -2  -6   1 7.02953 1.28128   2
  -2  -6   1 12.2451 3.45886   1
   1   6  -1 139.795 8.83832   5
  -1  -6   1 127.590 8.36515   1
   0   6  -1 660.882 27.7433   5
   0  -6   1 663.563 27.3775   1
  -1   6  -1 1660.98 64.6304   5
   1  -6   1 1735.94 64.2655   1
  -2   6  -1 1606.26 62.8710   5
   2  -6   1 1692.76 62.2446   1
   2  -6   1 1682.13 62.9021   1
  -3   6  -1 164.498 8.98305   5
   3  -6   1 152.192 7.67149   1
   3  -6   1 159.718 7.27350   1
   3  -6   1 151.328 6.33131   4
  -4   6  -1 28.1180 5.73224   5
   4  -6   1 19.3687 1.50942   4
   5  -6   1 203.965 8.26063   3
   5  -6   1 203.425 8.12838   4
   6  -6   1 613.476 23.3098   3
   6  -6   1 622.809 23.0958   4
   7  -6   1 788.005 29.5924   3
   8  -6   1 2.16802 0.80781   4
   8  -6   1 0.94039 0.84012   3
   9  -6   1 452.087 17.6687   3
   9  -6   1 442.892 17.0735   4
  10  -6   1 49.6318 3.39104   3
  10  -6   1 46.7302 3.73046   4
  11  -6   1 19.5071 2.36331   3
  11  -6   1 21.1063 1.80421   4
  12  -6   1 2.61418 1.13479   3
  13  -6   1 58.9162 3.57862   3
  14  -6   1 168.577 7.32001   3
 -14  -5   1 71.1292 3.52600   2
 -13  -5   1 45.3633 2.70624   2
 -12  -5   1 65.0448 3.61655   2
 -11  -5   1 1.86373 1.07766   2
 -10  -5   1 199.710 8.57926   2
   9   5  -1 34.3446 8.02220   5
  -9  -5   1 43.4059 2.86772   2
   8   5  -1 11.5081 4.88114   5
   8   5  -1 9.36197 1.41016   2
  -8  -5   1 8.97436 1.62177   2
  -8  -5   1 11.7249 10.2296   1
   7   5  -1 229.081 13.7196   5
   7   5  -1 215.949 8.69912   2
  -7  -5   1 227.416 9.05892   2
  -7  -5   1 212.920 16.0335   1
   6   5  -1 40.2739 2.24114   2
   6   5  -1 43.9823 6.10234   5
  -6  -5   1 42.7237 7.70458   1
  -6  -5   1 41.4953 2.49278   2
   5   5  -1 19.8597 1.52368   2
   5   5  -1 24.5180 4.83284   5
  -5  -5   1 20.8057 1.68360   2
  -5  -5   1 22.1420 5.35750   1
   4   5  -1 224.090 12.5321   5
  -4  -5   1 219.037 8.84181   2
  -4  -5   1 236.019 13.1170   1
   3   5  -1 709.438 28.7549   5
   3   5  -1 629.719 24.8689   2
  -3  -5   1 700.458 29.0816   1
   2   5  -1 42.2825 4.70987   5
  -2  -5   1 42.2873 4.48583   1
   1   5  -1 620.282 25.4883   5
  -1  -5   1 602.307 25.3762   1
   0   5  -1 0.31738 1.77823   5
   0  -5   1 0.96851 1.44847   1
  -1   5  -1 31.2381 3.68824   5
   1  -5   1 33.1923 4.62331   1
   1  -5   1 36.4892 3.33328   1
  -2   5  -1 182.008 8.74237   5
   2  -5   1 169.167 7.97903   1
   2  -5   1 168.845 8.44877   1
  -3   5  -1 3.86751 2.14928   5
   3  -5   1 2.88407 1.10479   1
   3  -5   1 3.17189 1.28886   1
  -4   5  -1 418.589 17.0786   5
   4  -5   1 425.584 16.0096   4
   5  -5   1 928.503 34.4048   4
   6  -5   1 380.637 14.4981   4
   6  -5   1 383.875 14.7701   3
   7  -5   1 1.24635 0.80866   3
   7  -5   1 0.21181 0.63930   4
   8  -5   1 2.55162 0.79588   4
   8  -5   1 1.77617 0.91725   3
   9  -5   1 52.3242 3.30038   3
   9  -5   1 51.3736 2.77441   4
  10  -5   1 20.9534 1.77894   4
  10  -5   1 20.8234 2.35838   3
  11  -5   1 179.165 8.20582   3
  12  -5   1 342.551 14.1054   3
  13  -5   1 26.7416 2.51657   3
  14  -5   1 34.8661 2.53339   3
 -14  -4   1 17.6590 1.54481   2
 -13  -4   1 1.18105 0.87704   2
 -12  -4   1 28.4508 2.36628   2
  11   4  -1 127.597 5.88071   3
 -11  -4   1 129.383 6.01656   2
  10   4  -1 759.261 28.9100   3
 -10  -4   1 772.140 28.8835   2
   9   4  -1 1603.40 63.1507   5
   9   4  -1 1601.35 59.3802   3
  -9  -4   1 1640.08 59.3503   2
   8   4  -1 193.525 8.14183   3
   8   4  -1 193.739 12.1471   5
  -8  -4   1 197.638 8.13493   2
   7   4  -1 51.6679 2.79056   3
   7   4  -1 50.1791 6.06930   5
   7   4  -1 47.9349 2.50233   2
  -7  -4   1 65.9102 10.0309   1
  -7  -4   1 45.0950 2.64955   2
   6   4  -1 393.145 15.1042   2
   6   4  -1 405.032 19.2173   5
  -6  -4   1 402.591 15.3585   2
  -6  -4   1 417.833 20.6988   1
   5   4  -1 985.769 36.6364   2
   5   4  -1 1038.72 40.7044   5
  -5  -4   1 1035.67 41.5891   1
  -5  -4   1 960.140 36.9457   2
   4   4  -1 63.7016 5.45504   5
  -4  -4   1 57.4482 5.92812   1
   3   4  -1 29.1189 3.62503   5
  -3  -4   1 30.3386 3.82337   1
   2   4  -1 4137.92 153.266   5
  -2  -4   1 4206.09 154.978   1
   1   4  -1 575.904 23.6416   5
  -1  -4   1 588.583 23.8570   1
   0   4  -1 841.890 32.2877   5
   0  -4   1 795.670 32.5593   1
   0  -4   1 853.950 32.2462   1
  -1   4  -1 1968.66 72.9734   5
   1  -4   1 1978.15 72.8079   1
   1  -4   1 1970.36 73.0925   1
  -2   4  -1 394.272 15.9430   5
   2  -4   1 402.760 15.7915   1
   2  -4   1 395.961 15.6057   1
  -3   4  -1 1689.46 66.4984   5
   3  -4   1 1869.89 65.8775   1
   3  -4   1 1887.71 65.8435   1
   6  -4   1 1388.04 50.6068   4
   7  -4   1 22.5202 1.52935   4
   7  -4   1 14.2564 1.66866   3
   8  -4   1 188.699 7.30086   4
   8  -4   1 171.731 7.86477   3
   9  -4   1 15.5280 1.47642   4
   9  -4   1 14.6780 1.84488   3
  10  -4   1 18.8455 2.14164   3
  11  -4   1 18.8006 2.28618   3
  12  -4   1 -0.8399 0.98126   3
  13  -4   1 101.876 5.43822   3
  14  -4   1 1.61929 0.80707   3
  15  -4   1 35.2133 2.30398   3
 -14  -3   1 64.3454 3.23973   2
  13   3  -1 79.6886 3.98465   3
 -13  -3   1 78.8273 3.99540   2
  12   3  -1 50.7033 3.13694   3
 -12  -3   1 52.1931 3.17274   2
  11   3  -1 131.225 6.14098   3
 -11  -3   1 133.513 6.06998   2
  10   3  -1 1.89074 0.98166   3
 -10  -3   1 2.76575 1.16900   2
   9   3  -1 18.5288 4.63294   5
   9   3  -1 11.6889 1.60084   3
  -9  -3   1 10.1201 1.58821   2
   8   3  -1 213.632 11.8083   5
   8   3  -1 202.085 8.58522   3
  -8  -3   1 209.802 9.70895   2
   7   3  -1 400.157 15.8019   3
   7   3  -1 425.708 19.0633   5
  -7  -3   1 400.224 15.6810   2
  -7  -3   1 434.169 24.2186   1
   6   3  -1 887.045 35.3586   5
  -6  -3   1 890.692 36.8846   1
  -6  -3   1 839.157 32.0721   2
   5   3  -1 145.003 8.62887   5
  -5  -3   1 153.485 9.70994   1
   4   3  -1 765.485 30.8909   5
  -4  -3   1 775.091 31.5779   1
   3   3  -1 49.3999 4.06026   5
  -3  -3   1 55.2226 4.54091   1
   2   3  -1 687.029 26.8797   5
  -2  -3   1 672.967 27.0607   1
   1   3  -1 1568.86 58.8662   5
  -1  -3   1 1588.58 58.9978   1
   0   3  -1 6630.98 237.766   5
   0  -3   1 6484.03 237.960   1
  -1   3  -1 391.758 15.1410   5
   1  -3   1 363.496 14.7348   5
   1  -3   1 395.754 15.0763   1
   2  -3   1 9.64030 1.32001   1
   2  -3   1 7.20369 1.05919   1
  -3   3  -1 35.9561 2.27048   5
   6  -3   1 920.175 34.0331   3
   7  -3   1 19.7981 1.82472   3
   8  -3   1 495.715 18.3391   4
   8  -3   1 473.340 18.6864   3
   9  -3   1 66.8703 3.80858   3
  10  -3   1 33.3889 2.71080   3
  11  -3   1 61.0708 3.86826   3
  12  -3   1 20.7218 2.34235   3
  13  -3   1 177.565 8.02454   3
  14  -3   1 46.8200 3.07433   3
  15  -3   1 60.0640 3.24258   3
  14   2  -1 8.71529 1.27143   3
 -14  -2   1 6.37550 1.78466   2
  13   2  -1 281.252 11.4524   3
 -13  -2   1 280.787 11.1964   2
  12   2  -1 7.23660 1.43614   3
 -12  -2   1 5.49590 1.16445   2
  11   2  -1 35.2472 2.73184   3
 -11  -2   1 37.3261 2.57660   2
  10   2  -1 1201.91 44.1101   3
 -10  -2   1 1167.98 43.7593   2
   9   2  -1 86.0790 4.40365   3
  -9  -2   1 86.7506 4.16506   2
   8   2  -1 9.63781 1.45916   3
   8   2  -1 10.7697 3.11084   5
  -8  -2   1 9.72798 1.31996   2
   7   2  -1 4.04781 2.22503   5
  -7  -2   1 7.72042 5.48560   1
   6   2  -1 328.098 14.2264   5
  -6  -2   1 282.775 15.5104   1
   5   2  -1 951.244 36.4754   5
  -5  -2   1 914.597 37.3403   1
   4   2  -1 21.4347 2.81633   5
  -4  -2   1 28.4123 3.33404   1
   3   2  -1 2.95881 1.30743   5
  -3  -2   1 3.40552 1.66135   1
   2   2  -1 1607.77 60.0479   5
  -2  -2   1 1630.44 60.3239   1
   0   2  -1 20.4992 1.84320   1
   0   2  -1 17.7836 1.70008   5
   0  -2   1 19.1749 1.86260   1
  -1   2  -1 613.823 22.0876   5
  -1   2  -1 629.421 22.2108   1
   1  -2   1 535.672 22.0582   1
  -2   2  -1 110.596 4.76912   5
  -2   2  -1 129.984 5.00496   1
  -3   2  -1 1288.86 46.8593   5
   6  -2   1 6.61608 1.27417   3
   7  -2   1 905.737 33.6419   3
   8  -2   1 534.427 20.4633   3
   9  -2   1 72.9515 4.00801   3
  10  -2   1 71.1241 4.08503   3
  11  -2   1 293.755 12.2852   3
  12  -2   1 82.5688 4.68101   3
  13  -2   1 -0.4871 0.99951   3
  14  -2   1 76.2194 4.16029   3
  15  -2   1 3.12459 0.94272   3
  15   1  -1 40.2892 2.58880   3
  14   1  -1 51.3172 3.09956   3
 -14  -1   1 59.2061 3.34945   2
 -13  -1   1 23.9225 2.03368   2
  12   1  -1 20.8527 2.24101   3
 -12  -1   1 20.2888 1.99905   2
  11   1  -1 260.162 10.9491   3
  10   1  -1 1641.93 59.9862   3
 -10  -1   1 1606.85 59.4832   2
   9   1  -1 141.086 6.29646   3
  -9  -1   1 132.909 5.98803   2
   8   1  -1 603.249 22.5577   3
  -8  -1   1 584.784 22.1805   2
   7   1  -1 729.426 27.2288   3
  -7  -1   1 716.126 26.9370   2
  -7  -1   1 746.871 35.0627   1
   6   1  -1 134.489 6.85175   5
  -6  -1   1 120.050 9.70191   1
   5   1  -1 853.899 32.2672   5
  -5  -1   1 821.776 33.2998   1
   4   1  -1 594.184 23.3911   5
  -4  -1   1 605.828 24.1203   1
   3   1  -1 894.260 32.3558   5
  -3  -1   1 811.424 33.3318   1
   2   1  -1 3309.85 120.998   1
   2   1  -1 3333.44 120.805   5
   1   1  -1 62.1467 3.02205   5
   1   1  -1 55.6381 2.98641   1
  -1  -1   1 54.0043 3.12840   1
  -1   1  -1 3987.11 143.854   5
  -2   1  -1 6076.73 219.185   5
  -3   1  -1 64.2075 3.39701   1
   3  -1   1 60.9072 3.23772   1
  -4   1  -1 1192.95 44.4350   1
  -5   1  -1 5875.96 215.095   1
  -6   1  -1 210.310 11.1211   1
   6  -1   1 203.236 8.28993   3
   7  -1   1 25.6541 2.02613   3
  -8   1  -1 498.672 19.1987   2
   8  -1   1 529.424 19.7313   3
  -9   1  -1 1337.70 50.0641   2
   9  -1   1 1399.92 50.6690   3
 -10   1  -1 617.530 23.2271   2
  10  -1   1 620.240 23.8167   3
 -11   1  -1 50.0419 3.03646   2
  11  -1   1 51.9109 3.44385   3
 -12   1  -1 343.736 13.5275   2
  12  -1   1 353.503 14.2944   3
  13  -1   1 27.8335 2.50380   3
  14  -1   1 2.18241 0.94057   3
  15  -1   1 2.85241 0.78206   3
  15   0  -1 0.91421 0.66128   3
  14   0  -1 83.1321 4.30277   3
  13   0  -1 7.11416 1.46934   3
 -13   0   1 7.88027 1.29723   2
  12   0  -1 0.18359 1.02160   3
 -12   0   1 -0.7675 0.88398   2
  11   0  -1 19.0322 3.10586   3
 -11   0   1 14.0671 1.77935   2
  10   0  -1 225.937 9.58574   3
 -10   0   1 220.702 9.05040   2
   9   0  -1 75.7191 4.04961   3
  -9   0   1 73.5987 3.67041   2
   8   0  -1 82.0675 4.14528   3
   7   0  -1 272.150 10.8002   3
  -6   0   1 176.378 10.0257   1
   5   0  -1 497.520 18.0135   5
  -5   0   1 442.922 19.3863   1
   4   0  -1 647.273 23.6929   5
  -4   0   1 610.455 24.5131   1
  -3   0   1 2.14452 1.21155   1
   2   0  -1 287.500 11.3015   1
   2   0  -1 290.900 11.0635   5
   1   0  -1 1787.46 65.0986   5
  -1   0   1 1806.87 65.2779   1
   0   0  -1 781.195 27.7461   1
   0   0  -1 777.787 27.6569   5
   0   0   1 711.095 27.7482   1
  -1   0  -1 1263.01 45.7307   5
  -1   0  -1 1299.35 45.8826   1
   1   0   1 1232.68 45.7766   5
   1   0   1 1220.83 45.8657   1
  -2   0  -1 39.7869 2.42746   1
   2   0   1 36.9921 2.23428   5
   2   0   1 34.1202 2.44395   1
  -3   0  -1 371.186 14.1446   1
   3   0   1 326.775 13.6213   5
   3   0   1 343.902 14.1608   1
  -4   0  -1 174.063 8.14577   1
   4   0   1 159.628 7.32319   5
  -5   0  -1 20.1609 3.61660   1
   5   0   1 21.9162 2.30902   5
  -6   0  -1 531.163 23.3088   1
   6   0   1 558.403 21.0188   5
   6   0   1 569.256 23.6969   5
   6   0   1 531.835 20.7334   3
  -7   0  -1 753.698 33.3293   1
   7   0   1 704.504 27.1185   3
  -8   0  -1 18.1786 1.68307   2
   8   0   1 17.2174 1.78809   3
  -9   0  -1 110.792 4.89471   2
   9   0   1 106.715 5.24110   3
 -10   0  -1 175.933 7.46680   2
  10   0   1 179.467 7.91830   3
 -11   0  -1 23.5894 2.45479   2
  11   0   1 22.4437 2.36384   3
 -12   0  -1 14.3355 1.76376   2
  12   0   1 9.19569 1.85271   3
 -13   0  -1 -0.0384 0.91423   2
  13   0   1 1.10196 1.25080   3
  14   0   1 58.0533 3.37098   3
  15   0   1 32.6000 2.11232   3
  15  -1  -1 14.8704 1.53663   3
  14  -1  -1 48.8440 3.12904   3
  13  -1  -1 39.8192 2.98214   3
  12  -1  -1 354.640 13.3313   3
 -12   1   1 276.377 13.5017   2
 -11   1   1 328.883 12.8487   2
  10  -1  -1 34.0593 2.69221   3
 -10   1   1 32.0530 3.37158   2
   9  -1  -1 10.5526 1.70243   3
  -9   1   1 12.6739 1.55212   2
   8  -1  -1 690.589 26.0520   3
   7  -1  -1 232.815 9.40099   3
   6  -1  -1 865.591 32.0339   3
  -5   1   1 10.2522 2.54499   1
  -4   1   1 3568.41 129.666   1
   2  -1  -1 602.237 22.1375   1
   1  -1  -1 1580.50 56.5518   1
  -1   1   1 1532.41 56.5728   1
   0  -1  -1 1676.61 60.8701   1
   0   1   1 1628.16 60.9421   1
   0   1   1 1701.09 60.8680   5
  -1  -1  -1 3302.45 118.842   1
   1   1   1 3259.68 118.794   5
   1   1   1 3242.63 118.988   1
  -2  -1  -1 718.838 27.1428   1
   2   1   1 688.678 27.3500   1
   2   1   1 716.148 27.0152   5
  -3  -1  -1 191.985 8.87509   1
   3   1   1 196.061 8.63236   5
   3   1   1 177.669 9.10811   1
  -4  -1  -1 805.409 31.5508   1
   4   1   1 797.138 30.9764   5
  -5  -1  -1 1.44874 2.31495   1
   5   1   1 1.52903 1.39528   5
  -6  -1  -1 341.778 16.5911   1
   6   1   1 340.494 14.8885   5
  -7  -1  -1 98.7834 9.95154   1
   7   1   1 102.543 4.75559   3
   7   1   1 108.697 6.48580   5
  -8  -1  -1 1004.31 37.6804   2
   8   1   1 1044.86 38.0630   3
  -9  -1  -1 272.626 10.8087   2
   9   1   1 273.956 11.1643   3
 -10  -1  -1 2.52763 1.10458   2
  10   1   1 1.72213 1.05368   3
 -11  -1  -1 52.2926 3.11461   2
  11   1   1 53.9779 3.48391   3
 -12  -1  -1 7.74757 1.56901   2
  12   1   1 7.87691 1.52223   3
 -13  -1  -1 39.3368 2.60155   2
  13   1   1 40.1030 2.82370   3
 -14  -1  -1 5.29163 1.00331   2
  14   1   1 7.26267 1.35119   3
  15  -2  -1 9.75288 1.45390   3
  14  -2  -1 5.85029 1.30952   3
  13  -2  -1 -0.1604 0.83494   3
  12  -2  -1 55.3670 3.67686   3
  11  -2  -1 448.463 18.0552   3
  10  -2  -1 9.76113 1.81502   3
   9  -2  -1 324.339 13.0912   3
   8  -2  -1 232.156 9.65482   3
   8  -2  -1 236.762 9.26677   4
   7  -2  -1 132.695 5.86702   3
   6  -2  -1 326.011 12.6430   3
   2  -2  -1 3176.28 114.849   1
  -1   2   1 5606.89 202.730   5
   0  -2  -1 1929.66 68.8849   1
   0   2   1 1822.62 68.8526   5
  -1  -2  -1 1469.17 54.7509   1
   1   2   1 1477.45 54.7747   5
  -2  -2  -1 446.551 18.4061   1
   2   2   1 458.208 18.4113   5
  -3  -2  -1 691.460 28.0034   1
   3   2   1 716.511 27.8748   5
  -4  -2  -1 49.3808 4.47663   1
   4   2   1 51.3417 4.25075   5
  -5  -2  -1 27.9485 4.53744   1
   5   2   1 26.3171 3.52772   5
  -6  -2  -1 252.859 16.7995   1
  -6  -2  -1 232.667 9.49837   2
   6   2   1 257.969 12.3325   5
  -7  -2  -1 196.626 7.93472   2
  -7  -2  -1 194.527 13.7225   1
   7   2   1 212.357 10.8900   5
   7   2   1 191.838 8.10423   3
  -8  -2  -1 615.137 23.5831   2
   8   2   1 627.492 23.8437   3
   8   2   1 650.982 26.3376   5
  -9  -2  -1 796.379 29.7146   2
   9   2   1 796.612 29.9958   3
 -10  -2  -1 84.6160 4.20780   2
  10   2   1 80.9554 4.40839   3
 -11  -2  -1 141.527 6.30805   2
  11   2   1 139.134 6.53899   3
 -12  -2  -1 311.811 11.9664   2
  12   2   1 284.012 12.1440   3
 -13  -2  -1 38.3055 2.56496   2
  13   2   1 41.5880 2.69687   3
 -14  -2  -1 18.9198 1.63096   2
  14   2   1 18.6805 1.81433   3
  14  -3  -1 42.4170 2.90867   3
  13  -3  -1 51.0917 3.44808   3
  12  -3  -1 5.83360 1.44378   3
  11  -3  -1 0.70354 1.05762   3
  10  -3  -1 558.324 21.7695   3
   9  -3  -1 33.6855 2.09062   4
   9  -3  -1 35.3652 2.60137   3
   8  -3  -1 109.828 4.71510   4
   8  -3  -1 111.751 5.26280   3
   7  -3  -1 243.575 9.87406   3
   7  -3  -1 243.936 9.44034   4
   6  -3  -1 729.744 27.2174   3
  -3   3   1 295.103 11.5087   5
   2  -3  -1 4.67666 1.14186   1
  -2   3   1 3.04123 1.23774   5
   1  -3  -1 23.7639 2.10483   1
  -1   3   1 22.9654 2.32333   5
   0  -3  -1 1298.72 49.0243   1
   0   3   1 1323.62 49.1908   5
  -1  -3  -1 245.032 10.8608   1
   1   3   1 234.701 10.8866   5
  -2  -3  -1 476.771 19.6354   1
   2   3   1 458.995 19.5502   5
  -3  -3  -1 153.019 8.60793   1
   3   3   1 163.314 8.64879   5
  -4  -3  -1 125.577 8.00136   1
   4   3   1 126.775 7.73808   5
  -5  -3  -1 100.934 4.39780   2
   5   3   1 107.195 7.26329   5
  -6  -3  -1 30.0720 1.87383   2
  -6  -3  -1 37.2842 5.99738   1
   6   3   1 28.7158 1.73951   2
   6   3   1 31.0821 4.57707   5
  -7  -3  -1 22.8872 1.75412   2
  -7  -3  -1 23.6979 6.92015   1
   7   3   1 18.9864 4.79262   5
   7   3   1 22.7001 1.92038   3
   7   3   1 17.9281 1.59249   2
  -8  -3  -1 374.625 14.6197   2
   8   3   1 372.649 14.7555   3
   8   3   1 390.493 18.8474   5
  -9  -3  -1 18.8446 1.84444   2
   9   3   1 13.8862 5.07917   5
   9   3   1 19.3131 1.94628   3
 -10  -3  -1 22.6667 2.73610   2
  10   3   1 22.2164 2.17927   3
 -11  -3  -1 30.9805 2.43854   2
  11   3   1 30.9434 2.54215   3
 -12  -3  -1 0.79693 0.92099   2
 -13  -3  -1 141.244 6.17198   2
 -14  -3  -1 142.969 5.94956   2
  15  -4  -1 74.1892 3.74568   3
  14  -4  -1 8.74681 1.59797   3
  13  -4  -1 87.9692 4.85573   3
  12  -4  -1 188.073 8.52334   3
  11  -4  -1 16.8840 2.20226   3
  10  -4  -1 61.7756 3.78961   3
  10  -4  -1 56.7225 3.03112   4
   9  -4  -1 43.3851 2.39745   4
   9  -4  -1 39.8686 2.90836   3
   8  -4  -1 228.864 9.05546   4
   8  -4  -1 230.527 9.60279   3
   7  -4  -1 653.433 24.5766   3
   7  -4  -1 647.932 24.1429   4
   6  -4  -1 940.750 34.8574   3
   5  -4  -1 740.882 27.7062   4
  -4   4   1 5.97463 1.98566   5
   3  -4  -1 138.209 5.91245   1
   3  -4  -1 145.267 5.91960   1
  -3   4   1 132.958 6.67195   5
   2  -4  -1 1196.76 43.5020   1
   2  -4  -1 1143.28 43.1568   1
  -2   4   1 1108.45 43.2411   5
   1  -4  -1 672.180 27.1543   1
  -1   4   1 683.568 26.6811   5
   0  -4  -1 91.6884 5.42887   1
   0   4   1 92.3656 5.79864   5
  -1  -4  -1 138.539 7.62335   1
   1   4   1 141.481 7.91355   5
  -2  -4  -1 90.2369 6.16788   1
   2   4   1 94.8426 6.40299   5
  -3  -4  -1 24.1457 3.47176   1
   3   4   1 16.5723 3.35351   5
  -4  -4  -1 45.5665 2.43363   2
  -4  -4  -1 56.4711 5.88919   1
   4   4   1 47.0885 5.18528   5
   4   4   1 48.4291 2.30034   2
  -5  -4  -1 119.678 9.11563   1
  -5  -4  -1 122.169 5.16833   2
   5   4   1 126.034 8.61393   5
  -6  -4  -1 29.0905 1.87245   2
  -6  -4  -1 25.9081 6.78554   1
   6   4   1 28.4321 4.96547   5
   6   4   1 24.8257 1.66977   2
  -7  -4  -1 126.528 12.1093   1
  -7  -4  -1 116.281 5.14518   2
   7   4   1 105.642 9.05018   5
   7   4   1 119.663 5.18808   3
   7   4   1 108.863 4.80826   2
  -8  -4  -1 83.9732 4.12583   2
  -8  -4  -1 94.8539 17.2980   1
   8   4   1 70.5514 3.73771   2
   8   4   1 83.8556 8.53050   5
   8   4   1 93.0842 4.23859   3
  -9  -4  -1 79.0663 4.17569   2
   9   4   1 86.0540 4.24619   3
   9   4   1 69.7593 9.08121   5
 -10  -4  -1 93.1749 4.84257   2
  10   4   1 103.978 4.96972   3
 -11  -4  -1 4.00042 1.22903   2
  11   4   1 9.18015 1.67236   3
 -12  -4  -1 5.34501 1.47716   2
 -13  -4  -1 70.4352 3.61704   2
 -14  -4  -1 13.4163 1.31753   2
  14  -5  -1 0.29114 0.67900   3
  13  -5  -1 11.3115 1.81730   3
  12  -5  -1 194.524 8.74207   3
  11  -5  -1 62.4935 3.28461   4
  11  -5  -1 65.6366 4.00415   3
  10  -5  -1 0.69079 1.10266   3
  10  -5  -1 0.95278 0.71102   4
   9  -5  -1 5.45938 1.38532   3
   9  -5  -1 6.93068 1.26015   4
   8  -5  -1 4.54040 1.20259   3
   8  -5  -1 3.85739 0.91579   4
   7  -5  -1 51.5350 2.74737   4
   7  -5  -1 55.4162 3.09864   3
   6  -5  -1 12.6236 1.58400   3
   6  -5  -1 16.2548 1.41180   4
   5  -5  -1 768.749 28.5810   4
   5  -5  -1 781.545 28.8809   3
   4  -5  -1 484.632 18.1421   4
  -4   5   1 488.535 19.7379   5
   3  -5  -1 343.197 14.2244   1
   3  -5  -1 372.607 14.1877   1
  -3   5   1 337.355 15.0121   5
   2  -5  -1 567.499 22.9564   1
   2  -5  -1 596.052 22.4514   1
  -2   5   1 527.184 22.8668   5
   1  -5  -1 1.62975 3.41942   1
  -1   5   1 2.37599 2.15403   5
   0  -5  -1 465.660 19.6782   1
   0   5   1 460.019 20.0430   5
  -1  -5  -1 44.2392 4.44013   1
   1   5   1 45.0556 4.62472   5
  -2  -5  -1 422.578 19.6666   1
   2   5   1 456.589 20.1917   5
  -3  -5  -1 3660.41 138.477   1
   3   5   1 3762.25 138.775   5
  -4  -5  -1 14.2239 4.07721   1
  -4  -5  -1 13.1731 1.37438   2
   4   5   1 11.0698 1.21649   2
   4   5   1 18.6605 4.40786   5
  -5  -5  -1 86.1352 8.01114   1
  -5  -5  -1 74.0586 3.62523   2
   5   5   1 75.2376 3.44082   2
   5   5   1 75.3059 7.20886   5
  -6  -5  -1 662.497 31.1272   1
   6   5   1 646.894 24.6376   2
   6   5   1 692.504 30.5086   5
  -7  -5  -1 2.49262 6.72329   1
  -7  -5  -1 0.39786 0.83778   2
   7   5   1 1.98230 3.69739   5
   7   5   1 1.11767 0.76849   2
  -8  -5  -1 244.372 9.24150   2
  -8  -5  -1 201.784 21.3271   1
   8   5   1 200.975 8.62116   2
   8   5   1 220.975 14.4902   5
 -10  -5  -1 498.447 19.3105   2
 -11  -5  -1 164.937 7.25787   2
 -12  -5  -1 21.1203 2.05626   2
 -13  -5  -1 17.7073 1.69663   2
  14  -6  -1 13.7658 1.82301   3
  13  -6  -1 7.25319 1.62766   3
  12  -6  -1 29.2413 2.57566   3
  11  -6  -1 86.5417 4.69700   3
  11  -6  -1 79.0341 3.93009   4
  10  -6  -1 497.754 19.8395   3
  10  -6  -1 509.230 19.8126   4
   9  -6  -1 95.9449 4.54340   4
   9  -6  -1 99.6673 5.14212   3
   8  -6  -1 1026.92 38.3561   3
   8  -6  -1 1023.56 37.8533   4
   7  -6  -1 258.820 10.4886   3
   7  -6  -1 251.166 10.0619   4
   6  -6  -1 20.6591 1.64291   4
   6  -6  -1 18.8330 1.81371   3
   5  -6  -1 8.09441 1.31742   3
   5  -6  -1 6.68292 1.11805   4
   4  -6  -1 822.300 30.2343   4
  -4   6   1 817.579 32.6734   5
   3  -6  -1 557.477 22.4084   1
   3  -6  -1 588.549 22.1112   1
   3  -6  -1 544.560 20.7073   4
  -3   6   1 534.462 23.3417   5
   2  -6  -1 0.82293 1.58992   1
   2  -6  -1 0.68772 0.59070   4
   2  -6  -1 2.92726 3.57275   1
  -2   6   1 -3.5940 2.65234   5
   1  -6  -1 348.004 18.8345   1
   1  -6  -1 382.878 16.4530   1
  -1   6   1 370.291 17.1558   5
   0  -6  -1 110.017 7.16459   1
   0   6   1 108.900 8.65046   5
  -1  -6  -1 34.1125 4.46383   1
   1   6   1 34.8584 1.91736   2
   1   6   1 43.0541 5.26559   5
  -2  -6  -1 1433.90 58.3143   1
   2   6   1 1537.74 59.1761   5
  -3  -6  -1 35.6732 5.80901   1
  -3  -6  -1 45.2503 2.45190   2
   3   6   1 48.2612 6.39473   5
   3   6   1 44.9240 2.34045   2
  -4  -6  -1 496.576 19.0067   2
  -4  -6  -1 501.171 24.1833   1
   4   6   1 495.976 18.8342   2
   4   6   1 531.546 24.5838   5
  -5  -6  -1 1199.51 51.5190   1
   5   6   1 1258.14 51.4756   5
  -6  -6  -1 142.906 13.0172   1
  -6  -6  -1 144.064 6.32918   2
   6   6   1 145.134 6.05271   2
   6   6   1 145.580 11.4674   5
  -7  -6  -1 16.8399 8.77765   1
  -7  -6  -1 15.9173 1.83167   2
   7   6   1 14.6058 1.58220   2
   7   6   1 12.3576 5.08704   5
  -8  -6  -1 65.6220 3.63159   2
   8   6   1 58.6086 3.15026   2
   8   6   1 68.4921 10.0577   5
  -9  -6  -1 81.3729 4.24207   2
   9   6   1 63.6667 11.5688   5
 -10  -6  -1 246.923 10.2628   2
 -12  -6  -1 0.73697 0.84014   2
 -13  -6  -1 6.50207 1.16844   2
  14  -7  -1 1.50239 0.68845   3
  13  -7  -1 98.3948 4.87024   3
  12  -7  -1 43.4739 2.65256   4
  12  -7  -1 48.3760 3.19704   3
  11  -7  -1 45.2399 2.65613   4
  11  -7  -1 45.9255 3.22132   3
  10  -7  -1 43.8001 3.17516   3
  10  -7  -1 46.2936 2.72698   4
   9  -7  -1 126.505 5.91361   4
   9  -7  -1 129.750 6.22948   3
   8  -7  -1 222.586 9.52197   3
   8  -7  -1 223.048 9.09103   4
   7  -7  -1 6.47588 1.29694   4
   7  -7  -1 6.24450 1.24023   3
   6  -7  -1 469.283 17.6333   4
   6  -7  -1 457.929 17.8148   3
   5  -7  -1 478.659 19.0982   4
   5  -7  -1 466.759 18.2937   3
   4  -7  -1 103.996 4.58013   4
   3  -7  -1 431.400 17.5422   1
   3  -7  -1 405.561 18.3321   1
   3  -7  -1 409.258 15.7029   4
  -3   7   1 413.932 19.5358   5
   2  -7  -1 316.770 12.3255   4
   2  -7  -1 329.959 14.8470   1
  -2   7   1 320.748 16.2067   5
   1  -7  -1 320.606 12.5920   4
   1  -7  -1 345.137 15.7783   1
  -1   7   1 351.315 16.9766   5
  -1   7   1 317.008 12.4598   2
   0  -7  -1 198.367 10.7520   1
   0   7   1 166.536 6.96102   2
   0   7   1 173.074 11.2144   5
  -1  -7  -1 2294.49 84.3972   4
  -1  -7  -1 2216.10 84.4034   2
   1   7   1 2486.41 90.3868   5
  -2  -7  -1 3698.69 140.604   1
   2   7   1 3781.49 141.444   5
  -3  -7  -1 1.64564 0.80048   2
  -3  -7  -1 3.70518 3.56108   1
   3   7   1 4.61227 3.76863   5
   3   7   1 2.15278 0.76916   2
  -4  -7  -1 413.374 21.9918   1
   4   7   1 405.971 15.6715   2
   4   7   1 426.229 22.1461   5
  -5  -7  -1 60.6353 9.33468   1
  -5  -7  -1 75.4882 3.74008   2
   5   7   1 71.4040 8.83941   5
   5   7   1 72.5230 3.52900   2
  -6  -7  -1 396.389 15.2180   2
  -6  -7  -1 377.558 23.3544   1
   6   7   1 398.034 14.9436   2
   6   7   1 373.539 21.8334   5
  -7  -7  -1 206.527 8.65412   2
  -7  -7  -1 167.217 18.6180   1
   7   7   1 209.524 8.30195   2
   7   7   1 214.103 17.4935   5
  -8  -7  -1 118.965 5.59521   2
   8   7   1 113.239 5.14985   2
   8   7   1 127.550 12.7697   5
  -9  -7  -1 504.122 19.5039   2
 -10  -7  -1 97.1339 4.81028   2
 -11  -7  -1 63.2438 3.46618   2
 -12  -7  -1 0.71234 0.75109   2
  13  -8  -1 24.9821 2.00228   3
  12  -8  -1 288.370 11.4181   4
  12  -8  -1 283.323 11.6772   3
  10  -8  -1 95.3472 4.54274   4
  10  -8  -1 96.6087 5.01811   3
   9  -8  -1 -0.0228 0.76581   4
   9  -8  -1 -1.0593 0.78709   3
   8  -8  -1 26.3261 2.37237   3
   8  -8  -1 26.5483 2.56550   4
   7  -8  -1 70.2779 3.57116   4
   7  -8  -1 65.8141 3.75199   3
   6  -8  -1 113.613 5.20346   4
   6  -8  -1 118.644 5.37644   3
   5  -8  -1 366.038 14.1559   4
   4  -8  -1 19.5395 1.63873   4
   3  -8  -1 73.6546 5.56398   1
  -3   8   1 60.1052 2.98090   2
  -3   8   1 54.1546 9.44218   5
   2  -8  -1 15.2200 3.82459   1
   2  -8  -1 13.2854 1.33872   4
  -2   8   1 14.0687 1.35065   2
  -2   8   1 14.7458 5.29923   5
   1  -8  -1 806.034 29.7500   4
   1  -8  -1 822.748 33.6514   1
  -1   8   1 782.838 29.6041   2
  -1   8   1 809.396 35.2905   5
   0  -8  -1 316.190 16.6890   1
   0  -8  -1 326.370 12.5903   4
   0   8   1 349.060 18.5558   5
   0   8   1 328.677 12.5552   2
  -1  -8  -1 2.07673 0.83507   4
  -1  -8  -1 1.83877 3.08981   1
  -1  -8  -1 1.98375 1.71654   2
   1   8   1 3.24680 0.88324   2
   1   8   1 8.10709 4.98876   5
  -2  -8  -1 1328.20 49.4357   2
  -2  -8  -1 1402.40 55.7795   1
  -2  -8  -1 1311.61 49.2666   4
   2   8   1 1372.68 56.8768   5
  -3  -8  -1 604.904 29.9613   1
  -3  -8  -1 650.369 23.7216   2
   3   8   1 638.568 23.5990   2
   3   8   1 626.048 30.5527   5
  -4  -8  -1 273.454 17.7448   1
  -4  -8  -1 274.033 10.9779   2
   4   8   1 277.372 10.8516   2
   4   8   1 278.960 18.0440   5
  -5  -8  -1 95.7047 17.2151   1
  -5  -8  -1 108.757 5.12091   2
   5   8   1 116.614 5.01240   2
   5   8   1 99.6790 10.9639   5
  -6  -8  -1 -0.1641 0.85907   2
  -6  -8  -1 4.75190 7.76065   1
   6   8   1 1.15871 0.85009   2
  -7  -8  -1 2.94972 1.09052   2
  -7  -8  -1 7.85225 11.4381   1
   7   8   1 7.07586 6.66529   5
   7   8   1 1.17482 0.85765   2
  -8  -8  -1 53.9554 3.26254   2
   8   8   1 48.9758 2.85168   2
  -9  -8  -1 33.2375 2.53568   2
 -10  -8  -1 96.0851 4.62828   2
 -11  -8  -1 1.12762 0.79112   2
  12  -9  -1 19.9086 1.71615   4
  12  -9  -1 24.0364 1.98703   3
  11  -9  -1 13.8972 1.52057   4
  11  -9  -1 19.9397 1.93252   3
  10  -9  -1 55.0440 3.64581   3
  10  -9  -1 56.2534 3.10592   4
   9  -9  -1 230.847 9.49424   4
   9  -9  -1 232.958 9.79780   3
   8  -9  -1 0.34121 0.73904   4
   8  -9  -1 3.81471 1.11891   3
   7  -9  -1 36.2876 2.45404   4
   6  -9  -1 52.9162 3.07610   4
   5  -9  -1 11.5443 1.51415   4
   4  -9  -1 732.891 26.6531   4
  -4   9   1 689.663 26.2446   2
   3  -9  -1 68.2720 3.32385   4
   3  -9  -1 66.3365 6.02580   1
  -3   9   1 55.7837 3.28570   2
   2  -9  -1 529.431 21.3734   4
   2  -9  -1 544.926 24.9417   1
  -2   9   1 565.274 28.3978   5
  -2   9   1 641.545 22.4207   2
   1  -9  -1 179.633 7.45641   4
   1  -9  -1 186.902 11.6925   1
  -1   9   1 181.542 7.34018   2
  -1   9   1 185.198 14.5472   5
   0  -9  -1 0.80451 0.68181   4
   0  -9  -1 -1.3150 3.25490   1
   0   9   1 0.00632 0.71865   2
   0   9   1 4.10481 5.55022   5
  -1  -9  -1 6.92198 4.20274   1
   1   9   1 6.54126 1.26209   2
   1   9   1 11.8350 5.41534   5
  -2  -9  -1 10.5410 4.57140   1
   2   9   1 13.6058 1.54712   2
   2   9   1 4.83128 5.60380   5
  -3  -9  -1 850.033 32.1319   2
  -3  -9  -1 927.671 46.2613   1
   3   9   1 856.909 32.1207   2
   3   9   1 849.410 40.4316   5
  -4  -9  -1 363.865 22.3382   1
  -4  -9  -1 373.204 14.5978   2
   4   9   1 366.103 22.7118   5
   4   9   1 390.021 14.5632   2
  -5  -9  -1 -3.5057 7.57925   1
   5   9   1 0.46328 0.79337   2
   5   9   1 -4.2404 6.30143   5
  -6  -9  -1 33.4327 2.46381   2
  -6  -9  -1 22.4567 13.6488   1
   6   9   1 31.8844 2.27610   2
   6   9   1 25.6074 8.00380   5
  -7  -9  -1 18.2200 1.99158   2
   7   9   1 19.3929 1.85367   2
  -8  -9  -1 57.1226 3.32371   2
  -9  -9  -1 13.3040 1.71557   2
 -10  -9  -1 50.8575 2.81676   2
 -11  -9  -1 16.5225 1.38844   2
  11 -10  -1 6.26551 1.17173   4
  10 -10  -1 58.0695 3.12929   4
   9 -10  -1 3.42155 0.88836   4
   8 -10  -1 169.787 7.29530   4
   7 -10  -1 2.90097 0.98574   4
   6 -10  -1 144.038 6.38080   4
   5 -10  -1 201.591 9.28063   4
   4 -10  -1 50.2091 2.86926   4
  -4  10   1 43.8810 2.56919   2
   3 -10  -1 142.502 6.27207   4
   3 -10  -1 146.231 8.97740   1
  -3  10   1 144.420 6.04547   2
   2 -10  -1 199.334 13.0286   1
   2 -10  -1 199.027 8.10268   4
  -2  10   1 170.310 18.7493   5
  -2  10   1 197.889 7.91404   2
   1 -10  -1 200.524 8.13147   4
   1 -10  -1 190.643 12.9638   1
  -1  10   1 194.633 8.01962   2
  -1  10   1 221.394 17.8704   5
   0 -10  -1 49.5826 2.77369   4
   0 -10  -1 50.8293 8.12350   1
   0  10   1 64.1382 11.9891   5
   0  10   1 53.2442 2.85457   2
  -1 -10  -1 174.378 7.17188   4
  -1 -10  -1 165.579 13.2178   1
   1  10   1 181.275 7.31182   2
   1  10   1 168.100 15.5298   5
  -2 -10  -1 -0.7601 5.02640   1
   2  10   1 0.84230 0.86854   2
   2  10   1 -1.9889 6.95849   5
  -3 -10  -1 63.2370 3.43163   2
  -3 -10  -1 50.6321 10.8832   1
   3  10   1 65.5086 11.9895   5
   3  10   1 70.9440 3.52821   2
  -4 -10  -1 14.9782 14.0839   1
  -4 -10  -1 24.4808 2.10137   2
   4  10   1 18.8217 7.59422   5
   4  10   1 26.6220 2.10604   2
  -5 -10  -1 125.588 5.68768   2
   5  10   1 113.435 14.8564   5
   5  10   1 131.377 5.69756   2
  -6 -10  -1 3.76671 1.06867   2
   6  10   1 13.1858 8.12336   5
   6  10   1 4.68169 1.09676   2
  -8 -10  -1 103.589 4.74668   2
  -9 -10  -1 0.37302 0.79256   2
 -10 -10  -1 25.9574 1.69271   2
  11 -11  -1 19.6661 1.50103   4
  10 -11  -1 14.7032 1.45780   4
   9 -11  -1 1.49915 0.68484   4
   8 -11  -1 19.5973 1.83177   4
   7 -11  -1 24.0998 1.98477   4
   6 -11  -1 263.321 10.6544   4
   5 -11  -1 61.7112 3.37419   4
   4 -11  -1 81.6697 4.04175   4
  -4  11   1 77.5243 3.75890   2
   3 -11  -1 120.506 5.41756   4
  -3  11   1 118.468 5.23118   2
   2 -11  -1 19.0748 1.72788   4
   2 -11  -1 9.46900 6.22731   1
  -2  11   1 19.6610 1.72804   2
   1 -11  -1 56.6219 3.04059   4
   1 -11  -1 61.0569 9.48168   1
  -1  11   1 54.7955 3.03781   2
  -1  11   1 50.5733 14.0644   5
   0 -11  -1 1.41599 0.76042   4
   0 -11  -1 -0.2712 5.55820   1
   0  11   1 -0.8934 10.5639   5
   0  11   1 1.02120 0.82697   2
  -1 -11  -1 100.465 4.52052   4
  -1 -11  -1 69.9004 15.4728   1
   1  11   1 106.070 4.73904   2
   1  11   1 98.4092 16.2977   5
  -2 -11  -1 72.5762 12.1984   1
   2  11   1 87.4451 15.0794   5
   2  11   1 79.2019 3.96662   2
   3  11   1 129.857 5.66734   2
   3  11   1 102.975 15.1551   5
   4  11   1 24.2264 9.55062   5
   4  11   1 27.5732 2.18192   2
  -5 -11  -1 2.22746 1.05080   2
   5  11   1 0.20105 0.87729   2
  -6 -11  -1 23.8651 2.07159   2
   6  11   1 32.5462 2.19257   2
  -7 -11  -1 14.8973 1.70670   2
   7  11   1 19.3989 1.66016   2
  -8 -11  -1 18.2130 1.60397   2
  10 -12  -1 43.6246 2.33371   4
   9 -12  -1 7.00528 1.16379   4
   8 -12  -1 7.68665 1.30287   4
   7 -12  -1 22.6902 1.86501   4
   6 -12  -1 34.2456 2.34974   4
   5 -12  -1 156.121 6.74298   4
   4 -12  -1 67.0759 3.49138   4
  -4  12   1 64.0468 3.25757   2
   3 -12  -1 146.781 6.38097   4
  -3  12   1 148.542 6.20879   2
   2 -12  -1 140.262 6.01524   4
  -2  12   1 136.470 5.91768   2
   1 -12  -1 32.8787 2.11768   4
  -1  12   1 28.4153 2.16184   2
   0 -12  -1 2.63534 0.83150   4
   0  12   1 0.90974 0.87817   2
   1  12   1 1.93207 0.95126   2
   2  12   1 173.636 7.32434   2
   3  12   1 209.433 8.59072   2
   4  12   1 12.0560 2.21224   2
   5  12   1 42.5646 2.56471   2
   6  12   1 26.7677 1.90358   2
   7  12   1 0.31365 0.62897   2
   9 -13  -1 5.05084 0.87591   4
   8 -13  -1 7.65062 1.11865   4
   7 -13  -1 -0.0708 0.51010   4
   6 -13  -1 1.39736 0.73562   4
   5 -13  -1 108.266 4.86944   4
   4 -13  -1 0.32574 0.66935   4
  -4  13   1 -0.7284 0.76507   2
   3 -13  -1 1.58523 0.75265   4
  -3  13   1 0.78891 0.78371   2
   2 -13  -1 2.86110 0.84967   4
  -2  13   1 2.22614 0.84651   2
   1 -13  -1 44.1019 2.40330   4
  -1  13   1 42.1753 2.53274   2
   1  13   1 4.63861 1.02798   2
   2  13   1 202.916 8.25633   2
   3  13   1 0.46093 0.74702   2
   4  13   1 0.14229 0.76605   2
   5  13   1 1.62649 0.80162   2
   6  13   1 -0.0793 0.57793   2
   7 -14  -1 16.5094 1.29577   4
   6 -14  -1 116.697 4.93951   4
   5 -14  -1 2.46794 0.80680   4
   4 -14  -1 108.584 4.90650   4
  -3  14   1 39.9203 2.20617   2
   2 -14  -1 21.7087 1.49110   4
  -2  14   1 17.2386 1.96700   2
  -1  14   1 3.08484 0.81029   2
   0  14   1 41.9981 2.38033   2
   1  14   1 245.549 9.61407   2
   2  14   1 27.5434 1.85130   2
   3  14   1 1.30509 0.83077   2
  -1  15   1 -1.3057 0.87840   2
   2  15  -2 4.38182 0.78510   2
   1  15  -2 115.865 4.84643   2
   0  15  -2 23.7605 1.63735   2
  -1  15  -2 109.867 4.62973   2
   3 -15   2 6.81741 0.97683   4
   4 -15   2 11.3199 1.10579   4
   5 -15   2 39.6022 2.09669   4
   5  14  -2 22.1489 1.56462   2
   4  14  -2 55.9855 3.27368   2
   3  14  -2 22.5105 1.74631   2
   2  14  -2 26.6381 1.92605   2
   1  14  -2 27.2123 1.96443   2
   0  14  -2 61.4880 3.14221   2
  -1  14  -2 64.8793 3.27465   2
   1 -14   2 67.2048 3.17318   4
  -2  14  -2 -0.7183 0.64080   2
   2 -14   2 0.18752 0.58950   4
  -3  14  -2 48.7654 2.59525   2
   3 -14   2 50.4379 2.68323   4
   4 -14   2 37.2723 2.25482   4
   5 -14   2 0.48681 0.60868   4
   6 -14   2 112.002 4.90196   4
   7 -14   2 -0.0826 0.59813   4
   6  13  -2 0.38788 0.73821   2
   5  13  -2 6.99600 1.08583   2
   4  13  -2 83.6233 3.96903   2
   3  13  -2 0.26832 0.76566   2
   1  13  -2 23.4154 1.99947   2
   0  13  -2 45.4336 2.64799   2
   0 -13   2 42.9903 3.00605   4
  -1  13  -2 13.0149 1.55169   2
   1 -13   2 10.3446 1.38883   4
  -2  13  -2 0.89443 0.76432   2
   2 -13   2 0.45832 0.68742   4
   3 -13   2 108.694 4.99989   4
  -4  13  -2 21.9407 1.85392   2
   4 -13   2 26.4962 2.01020   4
   6 -13   2 57.8442 3.14224   4
   7 -13   2 14.9382 1.52569   4
   8 -13   2 42.5102 2.44817   4
   9 -13   2 1.47779 0.56374   4
   6  12  -2 194.919 7.91733   2
   5  12  -2 26.0561 3.07912   2
   4  12  -2 2.03402 0.97810   2
   3  12  -2 60.5414 3.23792   2
   3  12  -2 35.4684 10.7495   5
   2  12  -2 22.2952 2.01706   2
   2  12  -2 24.5267 15.1956   5
   1  12  -2 116.095 5.12185   2
   1  12  -2 92.4260 17.6561   5
  -1 -12   2 109.383 4.89177   4
   0  12  -2 95.7549 19.6736   5
   0  12  -2 99.1641 4.43961   2
   0 -12   2 68.1389 12.3761   1
   0 -12   2 90.7048 4.31491   4
  -1  12  -2 367.556 14.0312   2
   1 -12   2 358.962 20.4228   1
   1 -12   2 359.619 14.1074   4
  -2  12  -2 151.031 6.38114   2
   2 -12   2 149.837 6.56133   4
   2 -12   2 154.235 13.4811   1
  -3  12  -2 10.2154 1.51618   2
   3 -12   2 9.88762 1.53535   4
  -4  12  -2 86.9741 4.14251   2
   4 -12   2 96.1185 4.54579   4
   5 -12   2 98.8414 4.79598   4
   6 -12   2 153.137 6.70084   4
   7 -12   2 137.256 6.09773   4
   8 -12   2 85.4580 4.14942   4
   9 -12   2 178.343 7.38024   4
  10 -12   2 -0.1268 0.63934   4
  -9 -11   2 59.7735 2.94624   2
  -8 -11   2 100.359 4.53147   2
   7  11  -2 0.78157 0.79993   2
  -7 -11   2 0.79166 0.88290   2
   5  11  -2 215.318 8.52276   2
   5  11  -2 191.635 17.6937   5
  -5 -11   2 199.569 8.42012   2
   4  11  -2 22.5903 8.30313   5
   4  11  -2 22.6704 1.96134   2
  -4 -11   2 24.8906 13.7317   1
  -4 -11   2 16.9553 2.04959   2
   3  11  -2 73.2407 3.72487   2
   3  11  -2 89.7842 13.1898   5
  -3 -11   2 48.3850 13.7027   1
   2  11  -2 29.6737 2.16919   2
   2  11  -2 22.8380 8.26529   5
  -2 -11   2 25.5048 7.91392   1
  -1 -11   2 151.003 13.5169   1
  -1 -11   2 164.969 6.93315   4
   0  11  -2 483.546 17.7671   2
   0  11  -2 447.298 26.8902   5
   0 -11   2 460.216 17.7294   4
   0 -11   2 455.754 24.0092   1
  -1  11  -2 1.16111 10.2987   5
  -1  11  -2 1.88882 0.91317   2
   1 -11   2 6.74229 5.03182   1
   1 -11   2 2.54015 0.92385   4
  -2  11  -2 234.471 9.41477   2
   2 -11   2 230.462 13.8298   1
   2 -11   2 241.176 9.77239   4
  -3  11  -2 44.5207 2.74437   2
   3 -11   2 60.2155 3.95916   4
  -4  11  -2 29.3938 2.33326   2
   5 -11   2 6.65800 1.24479   4
   6 -11   2 46.5569 2.92846   4
   7 -11   2 3.05743 0.94639   4
   8 -11   2 -0.0239 0.69871   4
   9 -11   2 19.0111 1.76323   4
  10 -11   2 4.41863 0.95103   4
  11 -11   2 35.4927 2.04789   4
  -9 -10   2 11.3884 1.50955   2
  -8 -10   2 44.9222 2.94245   2
   7  10  -2 8.01876 12.4237   5
   7  10  -2 22.7805 1.92630   2
  -7 -10   2 19.3491 2.01425   2
   6  10  -2 26.1355 2.15464   2
   6  10  -2 22.5831 7.55282   5
  -6 -10   2 27.5309 2.27885   2
   5  10  -2 22.5053 1.93279   2
   5  10  -2 15.0998 7.15591   5
  -5 -10   2 17.7201 13.7868   1
  -5 -10   2 19.1766 1.97522   2
   4  10  -2 21.5499 6.74340   5
   4  10  -2 28.8182 2.88518   2
  -4 -10   2 24.1602 2.10689   2
  -4 -10   2 30.5241 8.69953   1
   3  10  -2 187.793 7.70174   2
   3  10  -2 198.421 15.7194   5
  -3 -10   2 172.324 15.1123   1
  -3 -10   2 179.291 7.63344   2
   2  10  -2 10.3646 6.53330   5
   2  10  -2 11.2689 1.59284   2
  -2 -10   2 12.0489 1.52448   4
  -2 -10   2 10.6997 5.15852   1
   1  10  -2 203.192 15.7616   5
   1  10  -2 218.769 8.68192   2
  -1 -10   2 212.961 8.61884   4
   0  10  -2 81.0026 3.77111   2
   0  10  -2 66.6897 10.8797   5
   0 -10   2 78.5497 3.81402   4
   0 -10   2 74.5996 8.78205   1
  -1  10  -2 15.0957 7.50505   5
  -1  10  -2 8.28231 1.20716   2
   1 -10   2 7.86595 1.39534   4
   1 -10   2 8.53511 4.38697   1
  -2  10  -2 6.47110 8.43771   5
  -2  10  -2 -0.4954 0.69843   2
   2 -10   2 -0.4937 3.46585   1
   2 -10   2 -0.7132 0.67286   4
  -3  10  -2 28.7915 2.05952   2
   3 -10   2 30.7607 5.16264   1
   3 -10   2 33.1331 2.26466   4
  -4  10  -2 42.2390 2.47127   2
   4 -10   2 48.9851 2.83806   4
   5 -10   2 226.977 9.40552   4
   6 -10   2 26.0403 2.20215   4
   7 -10   2 656.297 24.8724   4
   8 -10   2 30.3150 2.24140   4
   9 -10   2 107.207 5.01841   4
  10 -10   2 66.9320 3.45107   4
  11 -10   2 -0.0159 0.55639   4
 -11  -9   2 27.4668 2.12832   2
 -10  -9   2 -0.0698 0.76269   2
   8   9  -2 6.00929 7.53220   5
   8   9  -2 7.20739 1.41330   2
  -8  -9   2 8.91497 1.68788   2
   7   9  -2 253.011 18.7048   5
   7   9  -2 281.366 10.7851   2
  -7  -9   2 223.255 25.6531   1
  -7  -9   2 281.019 11.0953   2
   6   9  -2 4.89779 5.77377   5
   6   9  -2 5.63359 1.15701   2
  -6  -9   2 13.9042 10.0802   1
  -6  -9   2 3.51156 1.10810   2
   5   9  -2 179.330 7.31166   2
   5   9  -2 156.602 13.8110   5
  -5  -9   2 165.932 15.8420   1
  -5  -9   2 177.881 7.47799   2
   4   9  -2 99.9325 4.51177   2
   4   9  -2 89.6017 10.8952   5
  -4  -9   2 92.5632 4.57331   2
   3   9  -2 85.4324 10.0890   5
   3   9  -2 97.2079 4.37145   2
  -3  -9   2 93.0765 4.41390   2
  -3  -9   2 91.1563 10.2220   1
   2   9  -2 67.6252 9.32110   5
   2   9  -2 78.5106 3.70683   2
  -2  -9   2 76.9042 3.65995   4
  -2  -9   2 78.2776 3.74059   2
  -2  -9   2 75.9794 8.71253   1
   1   9  -2 0.99661 5.01721   5
   1   9  -2 2.32653 0.83105   2
  -1  -9   2 2.41701 3.65180   1
   0   9  -2 429.605 22.0771   5
   0   9  -2 390.518 15.9931   2
   0  -9   2 436.258 20.9679   1
  -1   9  -2 1.70863 0.72645   2
  -1   9  -2 2.82598 5.21230   5
   1  -9   2 0.47344 0.67937   4
   1  -9   2 1.20285 2.96748   1
  -2   9  -2 103.413 10.5950   5
  -2   9  -2 89.8253 4.06884   2
   2  -9   2 92.7892 4.32471   4
   2  -9   2 90.7580 7.18682   1
  -3   9  -2 758.885 28.9298   2
   3  -9   2 786.621 31.2354   1
   3  -9   2 808.120 29.3008   4
  -4   9  -2 194.675 8.08378   2
   4  -9   2 214.145 8.48047   4
   5  -9   2 204.734 8.51050   4
   6  -9   2 201.526 8.43825   4
   7  -9   2 468.780 18.6242   3
   7  -9   2 497.705 18.6301   4
   8  -9   2 127.190 5.79843   4
   8  -9   2 128.279 6.07531   3
   9  -9   2 292.148 11.5385   4
   9  -9   2 283.201 11.8176   3
  10  -9   2 4.89671 1.18727   3
  10  -9   2 8.83389 1.33828   4
  11  -9   2 3.77707 0.85354   4
  11  -9   2 7.57121 1.60635   3
  12  -9   2 150.490 7.05305   3
  13  -9   2 53.8905 3.99347   3
 -12  -8   2 99.1259 4.82376   2
 -11  -8   2 229.922 9.35396   2
   9   8  -2 7.03103 8.62762   5
   9   8  -2 1.19058 0.93619   2
  -9  -8   2 3.89547 1.14785   2
   8   8  -2 85.1156 11.0799   5
   8   8  -2 86.1972 4.18978   2
  -8  -8   2 95.7081 4.69308   2
   7   8  -2 22.8158 6.54924   5
  -7  -8   2 19.1887 10.7381   1
  -7  -8   2 21.6723 2.36793   2
   6   8  -2 542.868 28.2712   5
   6   8  -2 563.986 21.1063   2
  -6  -8   2 567.748 21.3986   2
   5   8  -2 479.062 18.4850   2
   5   8  -2 506.040 25.6869   5
  -5  -8   2 482.508 26.5434   1
  -5  -8   2 491.428 18.7192   2
   4   8  -2 487.259 18.0792   2
   4   8  -2 462.352 24.4568   5
  -4  -8   2 485.729 25.2094   1
  -4  -8   2 469.866 18.1669   2
   3   8  -2 1007.78 42.8603   5
   3   8  -2 943.113 36.0718   2
  -3  -8   2 1000.78 42.8584   1
  -3  -8   2 979.049 36.1896   2
   2   8  -2 1672.26 66.1530   5
  -2  -8   2 1614.22 59.9245   2
  -2  -8   2 1697.99 66.1100   1
  -2  -8   2 1597.06 59.8617   4
   1   8  -2 871.867 36.5928   5
   1   8  -2 845.835 30.8419   2
  -1  -8   2 820.786 30.8463   4
  -1  -8   2 860.722 36.0760   1
  -1  -8   2 791.178 30.7542   2
   0   8  -2 31.2443 6.07817   5
   0   8  -2 26.9661 1.75329   2
   0  -8   2 27.3469 4.73146   1
   0  -8   2 24.7297 1.79352   4
  -1   8  -2 982.461 36.8135   2
  -1   8  -2 1006.36 41.6469   5
   1  -8   2 991.372 36.9772   4
   1  -8   2 1039.95 40.7385   1
  -2   8  -2 881.752 40.4841   5
  -2   8  -2 864.725 32.5476   2
   2  -8   2 875.534 32.7584   4
   2  -8   2 923.278 35.7515   1
  -3   8  -2 10.9919 1.28352   2
  -3   8  -2 8.20335 5.68356   5
   3  -8   2 11.4894 1.37829   4
   3  -8   2 7.66361 4.66054   1
   4  -8   2 99.7174 4.87612   4
   5  -8   2 61.8214 3.25976   4
   6  -8   2 252.388 9.98422   4
   6  -8   2 241.749 9.98477   3
   7  -8   2 9.38383 1.66501   3
   7  -8   2 9.56935 1.47434   4
   8  -8   2 380.027 14.6475   4
   8  -8   2 368.926 14.8871   3
   9  -8   2 481.195 19.3406   3
   9  -8   2 509.424 18.9964   4
  10  -8   2 4.04344 0.95783   4
  10  -8   2 5.52013 1.40373   3
  11  -8   2 10.3964 1.78738   3
  11  -8   2 10.8100 1.89854   4
  12  -8   2 8.86538 1.64284   3
  13  -8   2 46.4673 2.95778   3
 -13  -7   2 -0.5265 0.56635   2
 -12  -7   2 9.19879 1.50013   2
 -11  -7   2 26.3247 2.25698   2
 -10  -7   2 1.25106 0.99286   2
   9   7  -2 181.397 15.1977   5
  -9  -7   2 222.222 8.99445   2
   8   7  -2 37.5939 2.46776   2
   8   7  -2 49.8618 9.06864   5
  -8  -7   2 28.7796 14.5901   1
  -8  -7   2 43.4058 2.95642   2
   7   7  -2 640.237 24.1198   2
   7   7  -2 658.402 31.1125   5
  -7  -7   2 607.454 34.1512   1
  -7  -7   2 668.236 24.5505   2
   6   7  -2 205.312 14.0156   5
   6   7  -2 197.240 7.94758   2
  -6  -7   2 177.869 15.8604   1
  -6  -7   2 199.939 8.22737   2
   5   7  -2 139.127 11.1188   5
   5   7  -2 136.833 5.75136   2
  -5  -7   2 134.190 5.92745   2
  -5  -7   2 132.240 11.5019   1
   4   7  -2 16.8321 1.54479   2
   4   7  -2 15.5447 5.17523   5
  -4  -7   2 16.8802 5.13835   1
  -4  -7   2 14.7805 1.60236   2
   3   7  -2 60.6704 6.96982   5
   3   7  -2 54.9517 2.82671   2
  -3  -7   2 53.9793 2.86957   2
   2   7  -2 941.142 34.6581   2
   2   7  -2 1018.58 40.0677   5
  -2  -7   2 963.546 39.7535   1
  -2  -7   2 867.041 34.8142   2
   1   7  -2 1295.92 50.9394   5
  -1  -7   2 1200.24 46.2389   4
  -1  -7   2 1311.17 50.8483   1
   0   7  -2 32.8955 5.14563   5
   0   7  -2 30.2717 1.87056   2
   0  -7   2 29.3380 1.88838   4
   0  -7   2 36.1744 4.55247   1
  -1   7  -2 30.2811 5.05273   5
   1  -7   2 34.8607 2.20782   4
   1  -7   2 49.1880 9.04277   1
   1  -7   2 39.5376 4.31847   1
  -2   7  -2 79.5524 7.01550   5
   2  -7   2 82.9553 3.82669   4
   2  -7   2 91.7707 5.95739   1
   2  -7   2 81.2377 8.63681   1
  -3   7  -2 657.775 27.9659   5
   3  -7   2 650.186 24.9430   4
   3  -7   2 689.069 26.9209   1
   3  -7   2 686.440 26.3820   1
   4  -7   2 53.3851 2.80887   4
   5  -7   2 173.621 7.16510   4
   6  -7   2 404.371 15.6499   3
   6  -7   2 404.935 15.5216   4
   7  -7   2 10.6909 1.42690   4
   7  -7   2 8.47044 1.54566   3
   8  -7   2 26.6720 2.02642   4
   8  -7   2 20.7541 2.22575   3
   9  -7   2 694.389 26.3496   3
   9  -7   2 681.034 25.7969   4
  10  -7   2 25.3607 2.48129   3
  10  -7   2 26.7680 2.02155   4
  11  -7   2 142.472 5.98880   4
  11  -7   2 137.399 6.68257   3
  12  -7   2 85.4733 4.95293   3
  13  -7   2 188.505 8.17984   3
  14  -7   2 31.5196 2.17010   3
 -13  -6   2 21.9042 1.98478   2
 -12  -6   2 2.46650 0.95397   2
 -11  -6   2 23.0052 2.20371   2
 -10  -6   2 138.821 6.41095   2
   9   6  -2 79.0432 10.1830   5
  -9  -6   2 73.5453 4.06097   2
   8   6  -2 152.929 6.43325   2
   8   6  -2 160.698 12.3376   5
  -8  -6   2 127.514 18.7259   1
  -8  -6   2 162.850 6.94481   2
   7   6  -2 135.427 10.9103   5
   7   6  -2 134.474 5.69409   2
  -7  -6   2 130.786 14.0905   1
  -7  -6   2 137.414 6.06431   2
   6   6  -2 426.731 21.6549   5
  -6  -6   2 435.625 16.5212   2
  -6  -6   2 423.910 23.3469   1
   5   6  -2 815.370 30.3201   2
   5   6  -2 845.718 35.8139   5
  -5  -6   2 822.183 36.6653   1
  -5  -6   2 810.567 30.5161   2
   4   6  -2 51.9156 6.19671   5
   4   6  -2 50.0244 2.62229   2
  -4  -6   2 54.6192 6.85507   1
  -4  -6   2 52.5359 2.77536   2
   3   6  -2 27.2196 4.79423   5
   3   6  -2 27.3363 1.68740   2
  -3  -6   2 26.8887 5.18283   1
  -3  -6   2 24.8448 1.92270   2
   2   6  -2 136.543 8.90350   5
   2   6  -2 120.563 5.20496   2
  -2  -6   2 134.624 8.94088   1
   1   6  -2 254.599 13.2661   5
  -1  -6   2 268.800 13.4906   1
   0   6  -2 9.05374 2.88249   5
   0  -6   2 7.25303 2.36273   1
  -1   6  -2 1668.79 59.8385   5
   1  -6   2 1621.58 59.4212   1
   1  -6   2 1373.48 64.1387   1
  -2   6  -2 261.583 12.4204   5
   2  -6   2 258.197 11.6540   1
   2  -6   2 246.390 12.3888   1
  -3   6  -2 231.997 11.6407   5
   3  -6   2 254.654 10.7720   1
   3  -6   2 236.326 10.2698   1
   3  -6   2 229.830 9.28216   4
  -4   6  -2 17.2936 4.01626   5
   4  -6   2 13.5947 1.32143   4
   5  -6   2 468.243 18.0045   3
   5  -6   2 482.611 17.9262   4
   6  -6   2 603.056 22.4925   4
   6  -6   2 599.321 22.6882   3
   7  -6   2 619.772 22.5075   3
   7  -6   2 560.488 22.6505   4
   8  -6   2 3.37021 1.02364   3
   8  -6   2 3.13716 0.82062   4
   9  -6   2 346.333 13.9496   3
   9  -6   2 341.371 13.3391   4
  10  -6   2 15.9975 2.00193   4
  10  -6   2 12.9627 2.11078   3
  11  -6   2 2.28066 1.17825   3
  11  -6   2 1.74594 1.33238   4
  12  -6   2 123.207 6.09407   3
  13  -6   2 12.4714 1.85397   3
  14  -6   2 166.179 7.22806   3
 -14  -5   2 154.710 6.30784   2
 -13  -5   2 21.6206 1.84575   2
 -12  -5   2 350.431 13.8601   2
 -11  -5   2 389.193 15.3649   2
 -10  -5   2 65.6931 3.75193   2
   9   5  -2 53.7981 8.45772   5
  -9  -5   2 50.9806 3.19708   2
   8   5  -2 142.204 11.1113   5
   8   5  -2 161.127 6.38296   2
  -8  -5   2 150.560 6.64756   2
  -8  -5   2 125.800 17.3290   1
   7   5  -2 715.692 31.5530   5
   7   5  -2 708.302 26.3493   2
  -7  -5   2 710.326 26.7123   2
  -7  -5   2 719.125 34.1680   1
   6   5  -2 38.8711 5.47210   5
   6   5  -2 30.1511 1.90035   2
  -6  -5   2 32.4744 2.09605   2
  -6  -5   2 34.0228 7.34642   1
   5   5  -2 584.467 22.3506   2
   5   5  -2 602.621 26.7559   5
  -5  -5   2 603.698 22.5753   2
  -5  -5   2 630.928 27.9724   1
   4   5  -2 1847.67 70.5901   5
  -4  -5   2 1805.72 71.2285   1
   3   5  -2 21.8178 1.55021   2
   2   5  -2 110.963 7.43867   5
  -2  -5   2 120.977 7.86418   1
   1   5  -2 181.634 9.79167   5
  -1  -5   2 192.134 9.93127   1
   0   5  -2 3464.65 128.905   5
   0  -5   2 3533.86 129.002   1
  -1   5  -2 3060.98 114.809   5
   1  -5   2 3090.16 115.143   1
   1  -5   2 3201.84 114.784   1
  -2   5  -2 55.8381 4.34439   5
   2  -5   2 53.4643 4.38658   1
   2  -5   2 51.9730 3.66050   1
  -3   5  -2 740.211 29.8540   5
   3  -5   2 774.089 29.1087   1
   3  -5   2 806.922 29.3445   1
  -4   5  -2 1860.75 68.6950   5
   5  -5   2 764.364 28.7885   4
   5  -5   2 797.067 29.1331   3
   6  -5   2 161.355 6.77897   3
   6  -5   2 158.494 6.52567   4
   7  -5   2 257.057 10.2564   3
   7  -5   2 247.582 9.87072   4
   8  -5   2 854.826 31.8637   4
   8  -5   2 869.670 32.3951   3
   9  -5   2 108.810 5.40889   3
   9  -5   2 110.952 4.84640   4
  10  -5   2 23.1971 1.86879   4
  10  -5   2 23.3235 2.41388   3
  11  -5   2 2.94576 1.28190   3
  12  -5   2 17.3056 2.23128   3
  13  -5   2 14.8949 2.05014   3
  14  -5   2 9.75971 1.57348   3
 -14  -4   2 11.9838 1.39503   2
 -13  -4   2 158.612 6.82012   2
  12   4  -2 85.0171 4.19664   3
 -12  -4   2 83.4374 4.31917   2
  11   4  -2 157.978 7.04851   3
 -11  -4   2 164.186 7.16667   2
  10   4  -2 4.50388 1.18465   3
 -10  -4   2 2.77202 1.74652   2
   9   4  -2 16.8471 1.91598   3
   9   4  -2 15.1775 4.95839   5
  -9  -4   2 15.9174 1.88991   2
   8   4  -2 178.862 7.52658   3
   8   4  -2 178.633 11.3044   5
  -8  -4   2 161.082 16.9766   1
  -8  -4   2 180.269 7.49408   2
   7   4  -2 12.3435 1.32076   2
   7   4  -2 13.9119 1.56869   3
   7   4  -2 8.70892 3.38605   5
  -7  -4   2 11.1128 1.43759   2
  -7  -4   2 17.1666 6.41246   1
   6   4  -2 185.018 10.8283   5
  -6  -4   2 174.183 12.1880   1
  -6  -4   2 181.132 7.35531   2
   5   4  -2 135.112 5.62176   2
   5   4  -2 147.391 8.97775   5
  -5  -4   2 143.699 10.0114   1
   4   4  -2 124.546 7.77947   5
  -4  -4   2 112.770 8.07006   1
   3   4  -2 321.575 15.3265   5
  -3  -4   2 350.622 15.9939   1
   2   4  -2 2920.29 108.183   5
   1   4  -2 10.5308 2.37629   5
  -1  -4   2 8.39659 2.35050   1
   0   4  -2 1100.11 42.2459   5
   0  -4   2 1122.50 42.8370   1
  -1   4  -2 283.535 12.8800   5
   1  -4   2 285.000 12.4254   1
  -2   4  -2 30.6347 2.98381   5
   2  -4   2 36.1976 2.90432   1
  -3   4  -2 36.2190 3.17575   5
   3  -4   2 36.7801 2.23092   1
   3  -4   2 38.3678 2.41102   1
  -4   4  -2 372.077 14.6783   5
  -5   4  -2 402.798 16.3231   5
   6  -4   2 96.0653 4.15731   4
   6  -4   2 95.3350 4.44574   3
   7  -4   2 162.949 6.55455   4
   7  -4   2 159.754 6.93681   3
   8  -4   2 112.459 5.24471   3
   8  -4   2 106.734 4.68920   4
   9  -4   2 30.1078 2.42659   3
   9  -4   2 27.1763 1.89455   4
  10  -4   2 0.39507 0.96105   3
  11  -4   2 296.461 12.4498   3
  12  -4   2 76.6300 4.47303   3
  14  -4   2 -1.0620 0.66413   3
  15  -4   2 12.6433 1.43028   3
 -14  -3   2 25.2067 2.17808   2
  13   3  -2 90.9575 4.44038   3
 -13  -3   2 92.4661 4.44968   2
  12   3  -2 42.7581 2.82286   3
 -12  -3   2 42.4082 2.85273   2
  11   3  -2 2.99907 1.01302   3
 -11  -3   2 2.16784 1.06555   2
  10   3  -2 146.945 6.76262   3
 -10  -3   2 154.295 6.72395   2
   9   3  -2 410.656 22.7469   5
   9   3  -2 422.964 16.6903   3
  -9  -3   2 445.203 16.5739   2
   8   3  -2 669.589 25.6447   3
   8   3  -2 694.022 28.6115   5
   7   3  -2 1.00205 2.39561   5
   7   3  -2 0.27534 0.70512   3
  -7  -3   2 0.54267 0.76686   2
  -7  -3   2 0.69877 6.13353   1
   6   3  -2 396.582 17.6522   5
  -6  -3   2 375.868 14.6178   2
  -6  -3   2 386.245 19.3096   1
   5   3  -2 189.392 10.1529   5
  -5  -3   2 197.274 11.3414   1
   4   3  -2 459.055 19.4492   5
  -4  -3   2 450.082 20.1346   1
   3   3  -2 728.242 28.6939   5
  -3  -3   2 712.618 29.0921   1
   2   3  -2 190.294 9.08699   5
   1   3  -2 5422.94 195.903   1
   1   3  -2 5331.75 195.548   5
   0   3  -2 148.876 7.12039   1
   0  -3   2 143.344 7.25442   1
  -1   3  -2 232.825 9.89851   5
  -1   3  -2 237.033 10.0933   1
   1  -3   2 240.406 10.0982   1
  -2   3  -2 109.056 4.96843   5
  -2   3  -2 95.2948 4.93617   1
   2  -3   2 105.353 4.88101   1
  -3   3  -2 267.415 11.0548   5
   3  -3   2 290.677 10.8282   1
  -5   3  -2 322.764 13.2269   5
   6  -3   2 1290.24 47.7559   3
   7  -3   2 560.858 21.2838   3
   8  -3   2 467.470 18.6004   3
   8  -3   2 413.194 16.3468   4
   9  -3   2 69.6257 3.88066   3
  10  -3   2 106.945 5.42037   3
  11  -3   2 16.4510 2.19568   3
  12  -3   2 48.9114 3.45700   3
  13  -3   2 196.141 8.70838   3
  15  -3   2 0.68099 0.66588   3
  14   2  -2 19.1615 1.77262   3
 -14  -2   2 16.9880 2.45953   2
  13   2  -2 179.791 7.68345   3
 -13  -2   2 171.739 7.40997   2
  12   2  -2 0.91221 0.93344   3
 -12  -2   2 0.59847 0.89103   2
  11   2  -2 48.3628 3.24211   3
 -11  -2   2 53.8227 3.08110   2
  10   2  -2 782.514 29.4418   3
 -10  -2   2 770.450 29.0817   2
   9   2  -2 397.912 15.4867   3
  -9  -2   2 387.501 15.1480   2
   8   2  -2 592.825 23.5543   5
   8   2  -2 577.388 21.9866   3
  -8  -2   2 566.370 21.7051   2
   7   2  -2 22.4177 1.79589   3
   7   2  -2 20.6130 3.55189   5
  -7  -2   2 20.2340 6.32649   1
  -7  -2   2 23.0850 1.67215   2
   6   2  -2 1971.11 74.4437   5
  -6  -2   2 2001.88 76.5261   1
   5   2  -2 2379.80 88.4433   5
  -5  -2   2 2381.20 89.6043   1
   4   2  -2 29.4360 3.12428   5
  -4  -2   2 31.2859 3.71571   1
   3   2  -2 1443.40 54.0863   5
   2   2  -2 116.664 6.25702   1
   2   2  -2 124.915 6.10742   5
  -1   2  -2 43.6135 2.60595   5
  -1   2  -2 44.2638 2.70601   1
  -2   2  -2 3185.41 116.224   5
  -2   2  -2 3290.45 116.434   1
   2  -2   2 3145.82 116.343   1
  -3   2  -2 1583.37 59.7908   5
   3  -2   2 1689.91 59.9508   1
  -4   2  -2 193.227 8.32612   1
  -4   2  -2 184.351 8.04939   5
   4  -2   2 182.819 7.83514   1
   6  -2   2 621.294 23.2638   3
   8  -2   2 2.17427 0.91565   3
   9  -2   2 158.658 7.08817   3
  10  -2   2 61.0865 3.71539   3
  11  -2   2 8.83213 1.92201   3
  12  -2   2 169.201 7.80288   3
  13  -2   2 1.46904 0.98373   3
  14  -2   2 233.137 9.79967   3
  15  -2   2 115.819 5.19969   3
  14   1  -2 44.2025 2.80507   3
 -14  -1   2 48.8899 3.01925   2
  13   1  -2 34.7366 3.69766   3
 -13  -1   2 47.5593 2.77437   2
  12   1  -2 4.24765 1.29317   3
 -12  -1   2 3.30007 1.02300   2
  11   1  -2 95.4615 5.02116   3
  10   1  -2 16.8943 2.04190   3
 -10  -1   2 12.2721 1.75879   2
   9   1  -2 69.9752 3.77789   3
  -9  -1   2 64.0675 3.46942   2
   8   1  -2 69.3658 3.56155   3
  -8  -1   2 64.4185 3.25029   2
   7   1  -2 1316.05 47.7047   3
  -7  -1   2 1296.48 51.9222   1
  -7  -1   2 1279.31 47.3815   2
   6   1  -2 903.976 34.5932   5
   5   1  -2 10.2923 2.25365   5
  -5  -1   2 12.5884 3.50383   1
   4   1  -2 8.54700 1.86003   5
   3   1  -2 371.027 14.8315   5
   3   1  -2 365.967 15.1833   1
   2   1  -2 128.071 5.95603   1
   2   1  -2 113.786 5.58066   5
  -1  -1   2 3842.26 139.638   1
   0   1  -2 54.9883 2.81596   5
   0   1  -2 58.0807 2.98796   1
   0  -1   2 55.2350 2.95663   1
  -1   1  -2 3775.99 136.336   5
   1  -1   2 3758.62 136.548   1
  -2   1  -2 900.286 32.9177   1
  -2   1  -2 857.911 32.5963   5
   2  -1   2 884.524 32.4818   5
   2  -1   2 880.195 32.5220   5
  -3   1  -2 120.779 5.74802   1
  -3   1  -2 112.235 5.38646   5
  -4   1  -2 598.076 22.7930   1
   4  -1   2 570.688 21.5498   5
   4  -1   2 586.435 21.5226   5
   4  -1   2 556.117 22.6037   1
  -5   1  -2 551.803 22.5043   1
  -6   1  -2 1134.20 45.7529   1
   6  -1   2 1157.82 42.1551   3
   7  -1   2 3.87633 1.07166   3
   8  -1   2 156.700 6.84792   3
  -9   1  -2 1.06311 0.88277   2
   9  -1   2 1.33673 1.01106   3
 -10   1  -2 478.908 18.2667   2
  10  -1   2 480.687 18.8248   3
 -11   1  -2 118.050 5.34159   2
  11  -1   2 115.283 5.83622   3
 -12   1  -2 234.019 9.61378   2
  12  -1   2 243.690 10.3229   3
  13  -1   2 4.33230 1.28094   3
  14  -1   2 2.28124 1.00473   3
  15  -1   2 36.6137 2.31533   3
  15   0  -2 3.27681 0.80805   3
  14   0  -2 42.0768 2.81930   3
  13   0  -2 3.95405 1.07124   3
 -13   0   2 5.31950 1.17475   2
  12   0  -2 18.4230 2.12264   3
 -12   0   2 16.7320 1.89090   2
 -11   0   2 65.5536 3.50819   2
  10   0  -2 543.259 21.1515   3
 -10   0   2 545.208 20.5909   2
   9   0  -2 537.911 20.7352   3
  -9   0   2 537.027 20.2362   2
   8   0  -2 111.849 5.22836   3
   7   0  -2 667.780 25.0672   3
   6   0  -2 1.31867 0.83493   3
  -6   0   2 2.61523 3.62149   1
   5   0  -2 314.320 12.0141   5
  -5   0   2 295.297 13.6298   1
   4   0  -2 2122.46 77.4143   5
   3   0  -2 517.860 19.3328   5
   3   0  -2 502.924 19.8074   1
   2   0  -2 1275.62 46.4636   5
   2   0  -2 1260.45 46.7886   1
  -1   0   2 3875.64 140.499   1
   0   0   2 3195.09 116.006   1
  -1   0  -2 187.471 7.89265   1
  -1   0  -2 186.743 7.74525   5
   1   0   2 190.315 8.43621   1
   1   0   2 187.937 7.81570   5
  -2   0  -2 8.48586 1.54265   5
  -2   0  -2 8.94575 1.65984   1
   2   0   2 9.79754 1.48144   5
   2   0   2 11.2016 1.99669   1
  -3   0  -2 1550.10 56.1907   1
   3   0   2 1511.29 56.3987   1
   3   0   2 1461.99 55.7483   5
  -4   0  -2 1427.61 52.6377   1
   4   0   2 1350.21 52.8169   1
   4   0   2 1406.62 51.9950   5
  -5   0  -2 1924.32 71.8527   1
   5   0   2 1901.40 70.7218   5
  -6   0  -2 219.483 11.9037   1
   6   0   2 244.240 13.1768   5
   6   0   2 200.983 8.51757   3
   6   0   2 203.661 9.41176   5
  -7   0  -2 -4.2110 6.75358   1
  -7   0  -2 2.92839 0.84684   2
   7   0   2 2.67399 0.87499   3
  -8   0  -2 712.420 27.2567   2
   8   0   2 760.259 27.7101   3
  -9   0  -2 418.568 17.8364   2
   9   0   2 476.076 17.5872   3
 -10   0  -2 321.175 12.8070   2
  10   0   2 334.033 13.3526   3
  11   0   2 493.726 19.4242   3
 -12   0  -2 9.67376 1.65943   2
  12   0   2 4.83709 1.25624   3
 -13   0  -2 40.6440 2.66331   2
  13   0   2 48.8300 3.61928   3
 -14   0  -2 0.27911 1.09999   2
  14   0   2 2.57468 0.94481   3
  15   0   2 5.30612 1.13007   3
  15  -1  -2 41.9765 2.57632   3
  14  -1  -2 72.1248 3.98080   3
  13  -1  -2 182.064 8.18978   3
  12  -1  -2 136.781 6.64126   3
 -11   1   2 235.553 9.50271   2
  10  -1  -2 1.91219 1.10744   3
 -10   1   2 -0.0065 1.60716   2
   9  -1  -2 28.9606 2.34679   3
  -9   1   2 25.7936 2.06708   2
   8  -1  -2 573.193 21.8463   3
   7  -1  -2 893.946 33.2258   3
   6  -1  -2 852.183 31.5822   3
  -5   1   2 0.42095 2.37577   1
   3  -1  -2 1183.75 43.6289   1
   2  -1  -2 2480.90 90.1936   1
   0  -1  -2 5.95030 1.13638   1
   0   1   2 6.46500 1.24896   5
  -2  -1  -2 1986.33 72.1160   1
   2   1   2 1911.95 71.9484   5
  -3  -1  -2 987.529 38.0762   1
   3   1   2 995.256 37.8490   5
  -4  -1  -2 865.385 32.8803   1
   4   1   2 793.523 32.2220   5
  -5  -1  -2 14.4183 3.79123   1
  -6  -1  -2 406.851 19.1890   1
   6   1   2 391.624 15.4230   3
   6   1   2 418.038 17.5797   5
  -7  -1  -2 408.255 20.3600   1
  -7  -1  -2 373.849 14.8363   2
   7   1   2 388.115 15.1300   3
   7   1   2 406.282 17.0993   5
  -8  -1  -2 771.037 29.2697   2
   8   1   2 799.586 30.3520   5
   8   1   2 799.011 29.6258   3
  -9  -1  -2 456.116 17.2356   2
   9   1   2 445.360 17.5734   3
 -10  -1  -2 203.845 8.43383   2
  10   1   2 201.487 8.80526   3
 -11  -1  -2 1.60053 0.96837   2
  11   1   2 2.53064 1.16828   3
 -12  -1  -2 50.7340 3.05457   2
  12   1   2 48.7156 3.30821   3
 -13  -1  -2 307.691 11.6901   2
  13   1   2 283.511 12.0053   3
 -14  -1  -2 58.1174 2.87095   2
  14   1   2 49.3266 3.39763   3
  15  -2  -2 26.2434 2.00601   3
  14  -2  -2 24.8257 2.29741   3
  13  -2  -2 28.0615 2.53176   3
  12  -2  -2 118.184 5.99682   3
  11  -2  -2 487.377 19.3426   3
  10  -2  -2 645.052 24.8557   3
   9  -2  -2 255.242 10.3189   3
   9  -2  -2 237.194 9.60706   4
   8  -2  -2 832.933 30.4151   4
   8  -2  -2 806.406 30.7407   3
   6  -2  -2 1098.68 40.4856   3
   3  -2  -2 27.3388 1.80001   1
   2  -2  -2 332.396 13.0296   1
   1  -2  -2 18.9157 1.85758   1
  -1   2   2 18.8991 1.96262   5
   0  -2  -2 1072.50 37.4604   1
   0   2   2 908.074 38.3303   5
  -1  -2  -2 3152.25 115.127   1
   1   2   2 3132.85 115.167   5
  -3  -2  -2 3896.56 141.906   1
   3   2   2 3822.35 141.727   5
  -4  -2  -2 51.7035 4.96855   1
  -5  -2  -2 1786.21 68.7295   1
   5   2   2 1794.83 68.0517   5
  -6  -2  -2 119.458 9.19020   1
   6   2   2 106.512 4.76164   3
   6   2   2 100.352 7.07535   5
  -7  -2  -2 326.057 18.2842   1
  -7  -2  -2 301.771 12.1733   2
   7   2   2 313.017 15.3628   5
   7   2   2 326.827 12.4416   3
   8   2   2 213.949 8.88196   3
   8   2   2 212.508 11.6969   5
  -9  -2  -2 60.6176 3.27505   2
   9   2   2 58.9446 3.47310   3
 -10  -2  -2 21.5405 2.07691   2
  10   2   2 22.7707 2.22244   3
 -11  -2  -2 1.28252 0.93910   2
  11   2   2 2.28445 1.12286   3
 -12  -2  -2 -0.6566 0.83586   2
  12   2   2 2.66826 1.12400   3
 -13  -2  -2 87.1088 4.02424   2
  13   2   2 73.8070 4.05710   3
 -14  -2  -2 0.81057 0.71829   2
  14   2   2 -2.8131 1.35542   3
  15  -3  -2 94.4066 4.51073   3
  14  -3  -2 -0.0644 0.84352   3
  13  -3  -2 50.6308 3.37561   3
  12  -3  -2 8.86741 1.88280   3
  11  -3  -2 3.30645 1.19875   3
  10  -3  -2 709.524 28.0901   4
  10  -3  -2 810.106 29.0840   3
   9  -3  -2 33.2872 2.12923   4
   9  -3  -2 38.3761 2.72291   3
   8  -3  -2 686.656 26.5073   4
   8  -3  -2 751.029 28.0743   3
   6  -3  -2 1150.89 42.0452   4
   3  -3  -2 3.01898 0.86916   1
   2  -3  -2 1625.91 58.9514   1
  -2   3   2 1568.27 59.0678   5
   1  -3  -2 52.1744 3.38220   1
  -1   3   2 48.6933 3.60239   5
   0  -3  -2 32.1037 2.79529   1
   0   3   2 25.7046 2.98400   5
  -1  -3  -2 29.7397 3.24315   1
   1   3   2 29.8233 3.28090   5
  -2  -3  -2 82.8364 5.45452   1
   2   3   2 75.5941 5.47154   5
  -3  -3  -2 34.4021 3.85800   1
  -4  -3  -2 15.6028 4.46070   1
   4   3   2 17.0199 3.31239   5
  -5  -3  -2 1055.26 39.5355   2
  -5  -3  -2 1049.91 43.4849   1
   5   3   2 1114.98 43.2028   5
  -6  -3  -2 4.95711 0.88954   2
  -6  -3  -2 6.45460 3.95152   1
   6   3   2 5.07543 0.86304   2
   6   3   2 7.32611 1.27018   3
  -7  -3  -2 484.612 25.2140   1
  -7  -3  -2 506.675 18.9839   2
   7   3   2 515.359 19.1539   3
   7   3   2 494.270 23.0733   5
  -8  -3  -2 0.36387 0.82345   2
   8   3   2 3.48013 3.74197   5
   8   3   2 2.00122 1.34496   3
  -9  -3  -2 172.050 7.35891   2
   9   3   2 173.062 11.6239   5
   9   3   2 170.180 7.48654   3
 -10  -3  -2 156.131 7.28837   2
  10   3   2 167.666 8.03578   3
 -11  -3  -2 0.59973 0.92831   2
  11   3   2 0.55468 0.86718   3
 -12  -3  -2 44.5137 2.87349   2
  12   3   2 44.1965 2.87560   3
 -13  -3  -2 19.1920 1.85350   2
 -14  -3  -2 37.3945 2.18474   2
  15  -4  -2 37.6530 2.36921   3
  13  -4  -2 0.65076 1.11030   3
  12  -4  -2 126.793 6.32082   3
  11  -4  -2 4.28450 1.28106   3
  10  -4  -2 9.70760 1.85156   3
  10  -4  -2 11.4804 1.43003   4
   9  -4  -2 93.8757 4.85968   3
   9  -4  -2 92.3233 4.24890   4
   8  -4  -2 28.3395 1.88152   4
   8  -4  -2 27.5839 2.26645   3
   7  -4  -2 1293.80 47.2696   4
   7  -4  -2 1291.81 47.7325   3
   6  -4  -2 18.5667 1.46392   4
   6  -4  -2 18.5330 1.69160   3
   5  -4  -2 10.5634 1.17301   4
  -4   4   2 91.6263 5.54268   5
   3  -4  -2 279.170 11.1116   1
  -3   4   2 259.734 11.7082   5
   2  -4  -2 181.908 8.17131   1
  -2   4   2 167.814 8.47863   5
   1  -4  -2 56.3695 4.01905   1
  -1   4   2 60.3410 4.54888   5
   0  -4  -2 37.7414 3.42184   1
   0   4   2 30.3320 3.66575   5
  -1  -4  -2 1790.82 68.4579   1
   1   4   2 1840.30 68.8551   5
  -2  -4  -2 226.067 11.4955   1
  -3  -4  -2 427.939 19.5694   1
   3   4   2 431.530 19.6628   5
  -4  -4  -2 1.28692 2.70824   1
  -4  -4  -2 1.97529 0.82872   2
   4   4   2 1.75494 0.68833   2
   4   4   2 0.28491 2.20551   5
  -5  -4  -2 252.241 10.1750   2
  -5  -4  -2 266.207 14.7388   1
   5   4   2 260.839 10.0214   2
   5   4   2 271.819 14.4521   5
  -6  -4  -2 475.998 23.4118   1
  -6  -4  -2 463.857 17.9427   2
   6   4   2 475.236 22.6072   5
   6   4   2 470.371 17.7129   2
   6   4   2 485.902 18.0434   3
  -7  -4  -2 267.208 10.5403   2
  -7  -4  -2 243.469 17.3599   1
   7   4   2 261.564 10.2060   2
   7   4   2 269.003 10.6056   3
   7   4   2 273.831 15.4286   5
  -8  -4  -2 669.766 25.9408   2
   8   4   2 747.728 26.7007   3
   8   4   2 645.445 30.8056   5
  -9  -4  -2 2.12819 1.04949   2
   9   4   2 2.34653 5.62042   5
   9   4   2 3.60607 1.00867   3
 -10  -4  -2 13.7389 1.89009   2
  10   4   2 13.7481 1.94167   3
 -11  -4  -2 42.1046 2.86521   2
  11   4   2 39.9421 3.41873   3
 -12  -4  -2 15.1043 1.82407   2
 -13  -4  -2 216.160 8.76295   2
 -14  -4  -2 6.13174 1.10336   2
  14  -5  -2 77.5174 4.09066   3
  13  -5  -2 182.468 8.16004   3
  12  -5  -2 18.5610 2.16831   3
  11  -5  -2 128.145 5.70657   4
  11  -5  -2 135.118 6.50907   3
  10  -5  -2 307.830 11.8537   4
  10  -5  -2 293.760 13.1245   3
   9  -5  -2 617.223 23.3619   4
   9  -5  -2 629.423 24.0494   3
   8  -5  -2 114.550 5.01192   4
   8  -5  -2 113.520 5.47900   3
   7  -5  -2 396.768 15.5413   3
   7  -5  -2 398.228 15.1346   4
   6  -5  -2 1674.14 61.3469   3
   5  -5  -2 328.810 12.7303   3
   5  -5  -2 325.607 12.4750   4
   4  -5  -2 343.522 12.9184   4
  -4   5   2 324.920 14.8314   5
   3  -5  -2 32.9352 1.87629   4
   3  -5  -2 37.2762 3.03510   1
   3  -5  -2 30.9501 3.74888   1
  -3   5   2 30.8770 4.40788   5
   2  -5  -2 862.441 32.2387   1
  -2   5   2 790.465 32.7156   5
   1  -5  -2 250.546 11.7688   1
  -1   5   2 253.986 12.3582   5
   0  -5  -2 539.757 22.5826   1
   0   5   2 535.376 23.0655   5
  -1  -5  -2 631.088 26.6429   1
   1   5   2 643.651 27.7142   5
  -2  -5  -2 1227.85 49.3685   1
   2   5   2 1277.26 49.9668   5
  -3  -5  -2 5.40735 2.74978   1
   3   5   2 3.41180 2.71182   5
   3   5   2 5.22891 0.83964   2
  -4  -5  -2 0.95373 3.09656   1
  -4  -5  -2 1.19104 0.71561   2
   4   5   2 2.11908 0.72826   2
   4   5   2 -0.4826 2.70052   5
  -5  -5  -2 87.6289 4.14537   2
  -5  -5  -2 91.2428 9.05761   1
   5   5   2 88.4661 8.13196   5
   5   5   2 90.9017 3.93956   2
  -6  -5  -2 103.238 13.4182   1
  -6  -5  -2 108.722 4.97376   2
   6   5   2 112.885 9.86620   5
   6   5   2 112.839 4.75974   2
  -7  -5  -2 394.186 23.9079   1
  -7  -5  -2 432.041 16.0978   2
   7   5   2 421.455 21.8478   5
   7   5   2 405.458 15.6697   2
  -8  -5  -2 53.2950 3.16509   2
   8   5   2 54.7451 8.93558   5
   8   5   2 49.3125 2.78570   2
  -9  -5  -2 261.409 10.6587   2
   9   5   2 253.969 16.7466   5
 -10  -5  -2 5.95080 1.33374   2
 -11  -5  -2 40.5899 2.84769   2
 -12  -5  -2 261.792 10.5521   2
 -13  -5  -2 0.80982 1.39903   2
  14  -6  -2 26.5560 2.34533   3
  13  -6  -2 4.61831 1.13381   3
  12  -6  -2 10.6920 1.81556   3
  12  -6  -2 5.34817 1.38441   4
  11  -6  -2 117.058 5.83738   3
  11  -6  -2 110.773 5.08074   4
  10  -6  -2 7.80518 1.64082   3
  10  -6  -2 9.72898 1.47122   4
   9  -6  -2 138.246 6.12101   4
   9  -6  -2 145.812 6.75865   3
   8  -6  -2 207.612 8.89595   3
   8  -6  -2 204.428 8.39744   4
   7  -6  -2 19.0845 1.62516   4
   6  -6  -2 581.279 21.3862   4
   6  -6  -2 558.134 21.6247   3
   5  -6  -2 133.691 5.56040   4
   5  -6  -2 128.797 6.77457   3
   4  -6  -2 765.327 27.4505   4
  -4   6   2 715.377 30.2347   5
   3  -6  -2 407.189 16.0653   1
   3  -6  -2 371.171 16.5248   1
   3  -6  -2 362.175 14.2101   4
  -3   6   2 364.035 17.2480   5
   2  -6  -2 1316.80 50.5603   4
   2  -6  -2 1443.59 52.5899   1
  -2   6   2 1364.09 53.4387   5
   1  -6  -2 924.558 35.2733   4
   1  -6  -2 965.704 40.8673   1
   1  -6  -2 979.884 38.1719   1
  -1   6   2 990.152 39.1469   5
   0  -6  -2 89.7378 6.43397   1
   0   6   2 79.1223 3.59533   2
   0   6   2 93.9710 7.28914   5
  -1  -6  -2 5.27344 2.73744   1
   1   6   2 1.93249 2.74568   5
  -2  -6  -2 244.505 13.3319   1
   2   6   2 253.175 13.9490   5
   2   6   2 221.762 9.07387   2
  -3  -6  -2 1059.22 39.6329   2
  -3  -6  -2 1035.13 44.5387   1
   3   6   2 1152.24 45.7011   5
  -4  -6  -2 1071.88 39.5822   2
  -4  -6  -2 1043.62 46.8509   1
   4   6   2 1111.30 45.8337   5
  -5  -6  -2 213.056 8.37132   2
  -5  -6  -2 190.496 14.0193   1
   5   6   2 197.221 13.5433   5
   5   6   2 204.856 8.12883   2
  -6  -6  -2 1026.91 36.7860   2
  -6  -6  -2 974.796 44.2727   1
   6   6   2 950.030 43.3532   5
   6   6   2 998.362 36.4627   2
  -7  -6  -2 152.541 16.0357   1
  -7  -6  -2 164.847 7.08838   2
   7   6   2 161.091 13.0773   5
   7   6   2 161.675 6.70695   2
   8   6   2 4.59082 1.00729   2
   8   6   2 8.76272 6.30495   5
  -9  -6  -2 78.1490 4.25013   2
   9   6   2 87.2778 12.3722   5
 -10  -6  -2 2.75819 1.07949   2
 -11  -6  -2 373.437 14.6582   2
 -12  -6  -2 1.46197 0.83394   2
 -13  -6  -2 43.0861 2.37034   2
  14  -7  -2 48.1224 2.72380   3
  13  -7  -2 16.8739 1.85705   3
  12  -7  -2 27.8157 2.43456   3
  12  -7  -2 24.1468 1.97490   4
  11  -7  -2 0.33397 0.85380   3
  11  -7  -2 -0.3128 0.63227   4
  10  -7  -2 73.0512 4.21411   3
  10  -7  -2 69.7880 3.64993   4
   9  -7  -2 16.8307 2.63708   4
   8  -7  -2 152.045 6.63099   4
   8  -7  -2 158.829 7.14239   3
   7  -7  -2 66.5174 3.39297   4
   7  -7  -2 63.1660 3.65919   3
   6  -7  -2 8.12577 1.28383   4
   6  -7  -2 7.20739 1.47057   3
   5  -7  -2 164.342 6.69519   4
   5  -7  -2 156.492 6.80033   3
   4  -7  -2 59.6840 3.00273   4
   3  -7  -2 95.0729 4.12924   4
   3  -7  -2 78.3577 8.43579   1
   3  -7  -2 93.1664 6.02384   1
  -3   7   2 94.9436 8.63435   5
   2  -7  -2 331.942 12.6353   4
   2  -7  -2 336.163 15.4747   1
  -2   7   2 342.255 17.0885   5
  -2   7   2 316.521 12.4478   2
   1  -7  -2 27.5040 1.71870   4
  -1   7   2 26.7154 5.79716   5
  -1   7   2 29.8695 1.71905   2
   0  -7  -2 689.988 25.8127   4
   0  -7  -2 699.291 29.9497   1
   0   7   2 667.087 25.7494   2
   0   7   2 752.472 31.3034   5
  -1  -7  -2 53.6678 6.04124   1
  -1  -7  -2 49.6107 2.51954   4
  -1  -7  -2 47.8791 2.59876   2
   1   7   2 50.6099 6.83675   5
   1   7   2 48.6696 2.50539   2
  -2  -7  -2 137.175 5.77002   2
  -2  -7  -2 147.348 10.2418   1
   2   7   2 129.899 5.61445   2
   2   7   2 140.360 10.9628   5
  -3  -7  -2 97.8274 9.00433   1
  -3  -7  -2 85.1456 4.07670   2
  -4  -7  -2 73.2610 8.78898   1
  -4  -7  -2 70.3559 3.48410   2
   4   7   2 64.3919 3.30454   2
   4   7   2 64.4964 8.10690   5
  -5  -7  -2 450.713 17.4340   2
  -5  -7  -2 455.059 24.5179   1
   5   7   2 467.070 17.2595   2
   5   7   2 438.250 24.1588   5
  -6  -7  -2 9.94300 7.65385   1
  -6  -7  -2 3.21385 1.05878   2
   6   7   2 5.87698 4.75753   5
   6   7   2 5.21150 1.06408   2
  -7  -7  -2 306.196 23.7052   1
   7   7   2 297.643 11.9418   2
   7   7   2 324.595 20.0333   5
  -8  -7  -2 21.6625 2.17875   2
   8   7   2 18.7923 1.82756   2
   8   7   2 25.2218 7.83213   5
  -9  -7  -2 49.6089 3.15061   2
   9   7   2 27.0115 9.53430   5
 -10  -7  -2 1.86157 1.33599   2
 -11  -7  -2 66.3007 3.52333   2
 -12  -7  -2 8.99499 1.46459   2
  13  -8  -2 2.07548 0.77070   3
  12  -8  -2 175.736 7.42702   4
  12  -8  -2 184.678 7.86905   3
  11  -8  -2 11.8146 1.48317   4
  11  -8  -2 10.6147 1.75431   3
  10  -8  -2 4.64420 1.02172   4
  10  -8  -2 2.62051 1.09319   3
   9  -8  -2 71.6160 4.16084   3
   9  -8  -2 77.0664 3.85330   4
   8  -8  -2 13.0726 1.87994   3
   8  -8  -2 13.0810 1.80349   4
   7  -8  -2 533.349 20.1952   4
   7  -8  -2 527.602 20.4579   3
   6  -8  -2 378.881 14.6817   4
   5  -8  -2 319.030 12.4836   4
   4  -8  -2 102.171 4.57063   4
  -4   8   2 97.8937 4.26747   2
   3  -8  -2 24.5516 4.17335   1
   3  -8  -2 18.8275 1.56621   4
  -3   8   2 15.0078 1.40928   2
  -3   8   2 18.4624 6.98207   5
   2  -8  -2 307.684 14.5560   1
   2  -8  -2 286.376 11.1994   4
  -2   8   2 272.802 16.3318   5
  -2   8   2 270.018 10.8201   2
   1  -8  -2 494.070 21.9752   1
   1  -8  -2 465.520 17.8249   4
  -1   8   2 444.479 17.6801   2
  -1   8   2 505.626 24.0576   5
   0  -8  -2 870.474 32.4055   4
   0  -8  -2 874.705 37.1936   1
   0   8   2 872.989 32.3694   2
   0   8   2 906.744 39.0380   5
  -1  -8  -2 1303.15 49.7564   2
  -1  -8  -2 1388.67 49.7938   4
  -1  -8  -2 1367.44 55.4309   1
   1   8   2 1401.14 57.0874   5
  -2  -8  -2 84.6861 8.45045   1
  -2  -8  -2 85.7019 4.00928   2
   2   8   2 89.3876 4.00265   2
   2   8   2 73.2064 9.60411   5
  -3  -8  -2 805.761 37.2019   1
  -3  -8  -2 798.235 30.4179   2
   3   8   2 818.429 37.8922   5
   3   8   2 852.652 30.4042   2
  -4  -8  -2 345.351 20.6670   1
  -4  -8  -2 351.545 13.3993   2
   4   8   2 341.338 13.2440   2
   4   8   2 321.021 20.1548   5
  -5  -8  -2 159.026 6.95659   2
  -5  -8  -2 152.300 15.0040   1
   5   8   2 162.975 6.79977   2
   5   8   2 168.938 14.5472   5
  -6  -8  -2 103.513 15.7036   1
   6   8   2 110.753 12.7561   5
  -7  -8  -2 3.55997 15.3607   1
  -7  -8  -2 5.58729 1.32016   2
   7   8   2 3.15455 0.97854   2
   7   8   2 5.79909 6.68773   5
  -8  -8  -2 197.678 8.15902   2
   8   8   2 181.127 7.69477   2
  -9  -8  -2 35.9099 2.59886   2
 -10  -8  -2 13.3831 1.71031   2
 -11  -8  -2 3.55523 0.86604   2
  12  -9  -2 8.18867 1.40569   3
  11  -9  -2 1.22315 0.70129   4
  11  -9  -2 2.76555 0.95412   3
  10  -9  -2 69.6935 3.63812   4
  10  -9  -2 74.0764 3.99702   3
   9  -9  -2 208.169 8.68817   4
   9  -9  -2 212.320 9.03563   3
   8  -9  -2 20.2608 2.14304   3
   8  -9  -2 16.5506 1.81589   4
   7  -9  -2 59.9472 3.34818   4
   6  -9  -2 0.42433 0.87006   4
   5  -9  -2 38.1382 2.45480   4
   4  -9  -2 12.7655 1.56516   4
  -4   9   2 14.0007 1.58603   2
   3  -9  -2 113.680 5.11869   4
   3  -9  -2 119.559 8.09725   1
  -3   9   2 112.130 4.89124   2
   2  -9  -2 719.691 26.2727   4
   2  -9  -2 696.271 30.1846   1
  -2   9   2 709.567 34.0853   5
  -2   9   2 688.980 26.0412   2
   1  -9  -2 17.7593 1.60304   4
   1  -9  -2 26.3112 5.60840   1
  -1   9   2 22.9351 11.9045   5
  -1   9   2 21.5687 1.67836   2
   0  -9  -2 315.293 11.9817   4
   0  -9  -2 295.590 16.9447   1
   0   9   2 314.321 11.9887   2
   0   9   2 305.691 19.4171   5
  -1  -9  -2 2.79105 4.21656   1
  -1  -9  -2 6.32256 1.23237   4
   1   9   2 9.36061 5.74566   5
   1   9   2 6.36537 1.28412   2
  -2  -9  -2 13.5222 1.79989   2
   2   9   2 12.1489 1.58429   2
   2   9   2 10.9093 5.65382   5
  -3  -9  -2 99.8973 11.3892   1
  -3  -9  -2 109.958 5.11296   2
   3   9   2 120.933 12.9380   5
   3   9   2 120.044 5.17085   2
  -4  -9  -2 16.3956 7.37882   1
  -4  -9  -2 24.9210 2.06408   2
   4   9   2 22.6919 1.98892   2
  -5  -9  -2 362.139 24.7271   1
  -5  -9  -2 385.562 15.2785   2
   5   9   2 412.944 15.2352   2
   5   9   2 400.306 24.5345   5
  -6  -9  -2 21.2616 12.1058   1
  -6  -9  -2 42.5126 2.79406   2
   6   9   2 41.9762 2.62439   2
  -7  -9  -2 14.3154 1.84397   2
   7   9   2 16.1337 7.80115   5
   7   9   2 12.6976 1.68692   2
  -8  -9  -2 4.19133 1.52786   2
  -9  -9  -2 7.13172 1.35771   2
 -10  -9  -2 49.1914 2.66467   2
  11 -10  -2 1.73795 0.69426   4
  10 -10  -2 5.20454 1.01939   4
   9 -10  -2 106.677 4.93923   4
   8 -10  -2 100.515 4.77887   4
   7 -10  -2 14.1884 1.69074   4
   6 -10  -2 -0.5025 0.76386   4
   5 -10  -2 128.428 5.78418   4
   4 -10  -2 88.9167 4.54774   4
  -4  10   2 94.2072 4.17922   2
   3 -10  -2 355.189 16.7220   1
   3 -10  -2 377.592 14.3600   4
  -3  10   2 371.782 14.1322   2
   2 -10  -2 16.0625 5.08147   1
   2 -10  -2 24.1156 1.92970   4
  -2  10   2 25.1772 1.87589   2
   1 -10  -2 369.965 14.0933   4
   1 -10  -2 337.067 19.0022   1
  -1  10   2 373.486 23.9877   5
  -1  10   2 374.336 14.0455   2
   0 -10  -2 33.1562 2.14102   4
   0 -10  -2 35.9989 7.84721   1
   0  10   2 61.7120 12.3299   5
   0  10   2 33.9967 2.27231   2
  -1 -10  -2 168.977 13.4400   1
  -1 -10  -2 166.693 6.93783   4
   1  10   2 149.236 15.4851   5
   1  10   2 176.868 7.12111   2
  -2 -10  -2 82.1893 11.4064   1
   2  10   2 86.3404 13.5371   5
  -3 -10  -2 46.5511 9.98315   1
   3  10   2 53.6006 11.0985   5
   3  10   2 46.3227 2.82997   2
  -4 -10  -2 98.2891 4.67587   2
  -4 -10  -2 77.7631 14.7859   1
   4  10   2 99.1796 13.4196   5
   4  10   2 108.282 4.80062   2
  -5 -10  -2 1.83909 0.96414   2
   5  10   2 1.61122 0.96817   2
   5  10   2 -3.4351 11.4546   5
  -6 -10  -2 -0.8900 0.81272   2
   6  10   2 0.26144 0.83914   2
  -7 -10  -2 -0.0855 0.79702   2
   7  10   2 -0.8437 0.74310   2
  -8 -10  -2 2.08406 0.80993   2
   8  10   2 -0.9117 0.77284   2
  -9 -10  -2 8.11129 1.26710   2
  11 -11  -2 9.80076 1.17673   4
  10 -11  -2 19.9755 1.64169   4
   9 -11  -2 33.9702 2.24379   4
   8 -11  -2 9.36128 1.94515   4
   7 -11  -2 274.536 11.0240   4
   6 -11  -2 264.850 10.6861   4
   5 -11  -2 212.033 8.77980   4
   4 -11  -2 28.8213 2.17350   4
  -4  11   2 30.6413 2.08253   2
   3 -11  -2 80.5163 3.93766   4
  -3  11   2 75.8815 3.75401   2
   2 -11  -2 9.18548 7.02227   1
   2 -11  -2 8.53445 1.35004   4
  -2  11   2 6.84561 1.33494   2
   1 -11  -2 0.33992 0.65295   4
   1 -11  -2 1.65415 7.49381   1
  -1  11   2 -6.5977 14.2279   5
  -1  11   2 0.22792 0.78272   2
   0 -11  -2 110.686 5.00287   4
   0  11   2 114.499 5.11512   2
  -1 -11  -2 3.34863 6.72602   1
   1  11   2 -1.1486 9.12741   5
  -2 -11  -2 4.61575 10.3290   1
   2  11   2 18.7915 10.7762   5
   2  11   2 20.7345 1.95517   2
   3  11   2 99.3943 4.69911   2
   3  11   2 98.6329 23.0630   5
   4  11   2 142.832 6.25253   2
   5  11   2 89.3292 4.29270   2
  10 -12  -2 10.3474 1.13518   4
   9 -12  -2 2.86960 0.67671   4
   8 -12  -2 31.7038 2.09910   4
   7 -12  -2 89.6747 4.26609   4
   5 -12  -2 2.87183 0.91907   4
   4 -12  -2 3.22962 0.91933   4
   3 -12  -2 2.51639 0.87471   4
  -3  12   2 0.79485 0.78211   2
   2 -12  -2 1.35877 0.74740   4
  -2  12   2 1.46979 0.80103   2
   1 -12  -2 0.07239 0.64022   4
  -1  12   2 0.40393 0.79116   2
   0 -12  -2 -0.3854 0.65977   4
   0  12   2 0.92066 0.85282   2
   1  12   2 0.33313 0.81923   2
   2  12   2 1.34403 0.87579   2
   3  12   2 1.16164 1.13486   2
   4  12   2 124.453 5.47790   2
   5  12   2 17.6558 1.74159   2
   6  12   2 1.71078 0.72895   2
   8 -13  -2 1.03523 0.58962   4
   7 -13  -2 6.04481 1.08928   4
   6 -13  -2 153.828 6.44975   4
   5 -13  -2 36.0955 2.23550   4
   4 -13  -2 103.134 4.55870   4
  -4  13   2 97.1586 4.43857   2
   3 -13  -2 1.26401 0.63672   4
  -3  13   2 2.42117 0.83580   2
   2 -13  -2 115.110 4.92669   4
  -2  13   2 110.693 4.91058   2
   1 -13  -2 28.6612 1.88335   4
  -1  13   2 29.3292 2.06832   2
   0  13   2 21.9170 1.85984   2
   1  13   2 8.09757 1.47021   2
   2  13   2 3.02885 0.87400   2
   3  13   2 194.013 7.85908   2
   4  13   2 -0.1742 0.65105   2
   5  13   2 6.48786 1.07143   2
   6 -14  -2 144.336 5.88736   4
   5 -14  -2 4.44068 0.91499   4
   4 -14  -2 40.6357 2.19704   4
   3 -14  -2 28.1475 1.73096   4
  -3  14   2 28.8542 1.88773   2
   2 -14  -2 5.40742 1.11559   4
  -2  14   2 7.35194 1.29236   2
  -1  14   2 2.44602 0.95159   2
   0  14   2 0.63332 0.67313   2
   1  14   2 93.4540 4.27451   2
   2  14   2 4.23776 1.19076   2
   3  14   2 2.50538 0.68533   2
   2  15  -3 130.505 5.36526   2
   1  15  -3 0.28791 0.56120   2
   0  15  -3 19.8181 1.56189   2
  -1  15  -3 21.4943 1.53983   2
  -2  15  -3 22.2727 1.58721   2
   2 -15   3 22.0935 1.48167   4
   3 -15   3 14.4204 1.25915   4
   4 -15   3 22.7903 1.54701   4
   5 -15   3 82.0578 3.65736   4
   5  14  -3 57.5506 2.74518   2
   4  14  -3 197.785 7.87635   2
   3  14  -3 87.1863 4.01391   2
   2  14  -3 2.01154 0.81363   2
   1  14  -3 1.87873 0.77848   2
   0  14  -3 53.5857 2.88753   2
  -1  14  -3 31.6648 2.08179   2
   1 -14   3 30.0360 1.91965   4
  -2  14  -3 3.94055 0.91944   2
   2 -14   3 5.62167 1.11079   4
  -3  14  -3 68.4578 3.23304   2
   3 -14   3 66.0007 3.35751   4
   4 -14   3 4.82547 0.97536   4
   5 -14   3 11.7210 1.35487   4
   6 -14   3 24.3657 1.77512   4
   7 -14   3 0.34396 0.61427   4
   8 -14   3 22.0654 1.51440   4
   6  13  -3 34.5608 2.25265   2
   5  13  -3 25.7656 1.93993   2
   4  13  -3 31.9169 2.22525   2
   3  13  -3 17.5837 2.01440   2
   2  13  -3 121.080 5.39931   2
   1  13  -3 -0.2866 0.78816   2
  -1 -13   3 -0.3611 0.69105   4
   0  13  -3 186.882 7.73120   2
  -1  13  -3 141.332 5.95857   2
   1 -13   3 135.026 5.95998   4
  -2  13  -3 56.8476 3.01125   2
   2 -13   3 55.8103 3.10141   4
   3 -13   3 236.597 9.63855   4
  -4  13  -3 120.968 5.25402   2
   4 -13   3 126.947 5.62010   4
   6 -13   3 43.1614 2.60741   4
   7 -13   3 -0.1221 0.64023   4
   8 -13   3 41.8628 2.44873   4
   9 -13   3 41.6918 2.29721   4
   7  12  -3 40.2408 2.33137   2
   6  12  -3 103.523 4.65593   2
   5  12  -3 16.1858 2.32624   2
   4  12  -3 150.265 6.50098   2
   3  12  -3 9.46022 1.61720   2
   3  12  -3 12.3899 9.18795   5
   2  12  -3 152.884 6.57114   2
   2  12  -3 146.599 20.9265   5
   1  12  -3 292.434 23.9590   5
   1  12  -3 339.376 12.9731   2
  -1 -12   3 342.490 23.9707   1
  -1 -12   3 330.747 12.8516   4
   0  12  -3 415.496 28.9129   5
   0  12  -3 436.453 16.2304   2
   0 -12   3 413.215 16.1680   4
   0 -12   3 412.974 23.4266   1
  -1  12  -3 112.920 5.07590   2
   1 -12   3 113.520 5.16429   4
   1 -12   3 101.015 12.4114   1
  -2  12  -3 28.4243 2.12119   2
   2 -12   3 30.3230 2.23846   4
   2 -12   3 26.6357 7.27925   1
  -3  12  -3 96.2252 4.41412   2
   3 -12   3 93.8809 4.64808   4
  -4  12  -3 201.629 8.21323   2
   4 -12   3 210.183 8.66873   4
   5 -12   3 138.852 6.24702   4
   6 -12   3 75.4305 3.92306   4
   7 -12   3 4.23843 1.03312   4
   8 -12   3 17.9647 1.73368   4
   9 -12   3 2.18638 0.72078   4
  10 -12   3 29.5159 2.05998   4
  -9 -11   3 29.0570 1.94769   2
  -8 -11   3 16.9449 1.68590   2
   7  11  -3 30.8380 2.15590   2
  -7 -11   3 29.1045 2.27712   2
   6  11  -3 24.3530 2.00606   2
  -6 -11   3 14.1727 2.52171   2
   5  11  -3 19.0466 10.0977   5
   5  11  -3 19.9024 1.87155   2
  -5 -11   3 13.3489 1.88412   2
   4  11  -3 19.5925 1.85128   2
   4  11  -3 11.5550 7.74015   5
  -4 -11   3 21.3340 9.91105   1
  -4 -11   3 12.3458 1.96630   2
   3  11  -3 276.347 10.7196   2
   3  11  -3 253.330 19.6318   5
  -3 -11   3 251.425 25.0931   1
   2  11  -3 2.75660 0.97199   2
   2  11  -3 2.24583 7.04615   5
  -2 -11   3 2.89928 0.93219   4
  -2 -11   3 3.25989 6.41275   1
   1  11  -3 47.4792 15.2816   5
  -1 -11   3 38.3413 9.07844   1
  -1 -11   3 36.7968 2.41129   4
   0  11  -3 100.136 4.60649   2
   0  11  -3 89.9389 14.4686   5
   0 -11   3 91.4826 10.7745   1
   0 -11   3 101.653 4.65991   4
  -1  11  -3 46.8221 2.81305   2
  -1  11  -3 69.8582 14.8153   5
   1 -11   3 53.5292 8.55619   1
   1 -11   3 51.6247 2.95476   4
  -2  11  -3 141.749 6.05127   2
   2 -11   3 143.280 10.8977   1
   2 -11   3 142.450 6.31948   4
  -3  11  -3 6.13605 1.11721   2
  -4  11  -3 57.5834 3.04847   2
   4 -11   3 60.0132 3.39724   4
   5 -11   3 23.8705 2.15211   4
   6 -11   3 11.0843 1.67818   4
   7 -11   3 15.6763 1.74770   4
   8 -11   3 16.6516 1.77096   4
   9 -11   3 119.566 5.38984   4
  10 -11   3 128.167 5.55974   4
  11 -11   3 30.9097 1.89062   4
 -10 -10   3 7.10348 1.30096   2
  -9 -10   3 4.20004 0.96266   2
   8  10  -3 14.7888 1.57775   2
   7  10  -3 2.83912 8.26990   5
   7  10  -3 1.87748 0.91604   2
  -7 -10   3 0.67184 0.91488   2
   6  10  -3 3.56899 1.07576   2
   6  10  -3 3.10397 6.53897   5
  -6 -10   3 0.95499 0.91638   2
   5  10  -3 57.4118 3.14354   2
   5  10  -3 60.7207 10.7150   5
  -5 -10   3 54.6723 3.22181   2
  -5 -10   3 48.2941 13.0690   1
   4  10  -3 35.6096 9.72752   5
  -4 -10   3 39.9327 2.61719   2
  -4 -10   3 29.8133 8.65296   1
   3  10  -3 96.3473 11.4212   5
   3  10  -3 107.526 4.85865   2
  -3 -10   3 95.3760 11.9129   1
  -3 -10   3 102.083 4.80059   2
   2  10  -3 119.707 5.26464   2
   2  10  -3 118.789 12.4156   5
  -2 -10   3 114.285 5.15256   4
  -2 -10   3 116.935 11.7490   1
   1  10  -3 14.5116 6.05283   5
   1  10  -3 10.9578 1.48037   2
  -1 -10   3 12.3332 1.43377   4
   0  10  -3 120.391 11.9138   5
   0  10  -3 118.160 5.17834   2
   0 -10   3 114.395 10.2445   1
   0 -10   3 115.344 5.22173   4
  -1  10  -3 156.344 6.44674   2
  -1  10  -3 149.715 14.1163   5
   1 -10   3 157.371 11.1765   1
   1 -10   3 149.929 6.58798   4
  -2  10  -3 399.763 15.7996   2
  -2  10  -3 450.330 24.2731   5
   2 -10   3 419.550 16.1209   4
   2 -10   3 409.155 19.7877   1
  -3  10  -3 264.205 10.6558   2
   3 -10   3 283.175 13.2358   1
   3 -10   3 273.416 11.0018   4
  -4  10  -3 84.6382 3.99480   2
   4 -10   3 90.7552 4.37692   4
   5 -10   3 533.830 20.4657   4
   6 -10   3 100.068 5.05233   4
   7 -10   3 170.973 7.43804   4
   8 -10   3 21.5253 1.97727   4
   9 -10   3 168.486 7.22116   4
  10 -10   3 202.200 8.31249   4
  11 -10   3 -0.1102 0.59951   4
 -11  -9   3 -0.0517 0.67926   2
 -10  -9   3 44.6406 2.72432   2
  -9  -9   3 132.830 6.20008   2
   8   9  -3 31.8417 8.86939   5
   8   9  -3 40.8230 2.50231   2
  -8  -9   3 44.1591 2.87212   2
   7   9  -3 201.319 8.17947   2
   7   9  -3 180.778 15.2774   5
  -7  -9   3 203.665 8.52061   2
  -7  -9   3 198.287 24.1172   1
   6   9  -3 135.043 5.93745   2
   6   9  -3 129.398 13.2360   5
  -6  -9   3 140.542 6.34210   2
  -6  -9   3 127.731 16.7949   1
   5   9  -3 49.0956 2.78997   2
   5   9  -3 41.4764 9.01879   5
  -5  -9   3 42.7701 2.84629   2
  -5  -9   3 40.3357 10.9908   1
   4   9  -3 103.136 4.80718   2
   4   9  -3 104.456 11.0681   5
  -4  -9   3 100.750 12.1771   1
  -4  -9   3 107.598 4.93293   2
   3   9  -3 1.76418 4.27524   5
   3   9  -3 0.89984 0.79492   2
  -3  -9   3 -0.0561 0.76090   4
  -3  -9   3 2.62155 4.97504   1
  -3  -9   3 -0.2256 0.78087   2
   2   9  -3 330.213 12.8634   2
   2   9  -3 344.418 19.4572   5
  -2  -9   3 332.967 18.9565   1
  -2  -9   3 336.645 12.8374   2
  -2  -9   3 320.218 12.7943   4
  -1  -9   3 1864.14 67.7693   4
  -1  -9   3 1850.78 73.8866   1
   0   9  -3 162.161 12.4886   5
   0  -9   3 178.108 11.7041   1
   0  -9   3 175.571 8.30673   4
  -1   9  -3 11.6534 5.65065   5
  -1   9  -3 9.57417 1.27725   2
   1  -9   3 12.8460 3.91819   1
   1  -9   3 12.0696 1.36335   4
  -2   9  -3 240.315 14.7713   5
  -2   9  -3 229.884 9.07264   2
   2  -9   3 226.923 12.4282   1
   2  -9   3 227.178 9.30155   4
  -3   9  -3 258.188 10.0021   2
  -3   9  -3 229.629 16.1121   5
   3  -9   3 258.072 12.3506   1
   3  -9   3 264.858 10.3091   4
  -4   9  -3 614.364 23.7894   2
   4  -9   3 669.508 24.2539   4
   5  -9   3 20.3251 1.85414   4
   6  -9   3 1009.48 37.5358   4
   7  -9   3 7.47462 1.56359   4
   8  -9   3 97.3940 4.90920   3
   8  -9   3 95.4461 4.68620   4
   9  -9   3 13.0878 1.92458   3
   9  -9   3 11.5923 1.59561   4
  10  -9   3 10.7965 1.81298   3
  10  -9   3 8.97463 1.37476   4
  11  -9   3 250.042 9.77434   4
  11  -9   3 242.809 10.2620   3
  12  -9   3 5.25061 1.22711   3
  13  -9   3 98.7700 5.01800   3
 -12  -8   3 16.7762 1.73662   2
 -11  -8   3 49.3531 2.93383   2
 -10  -8   3 0.80357 1.01343   2
   9   8  -3 120.874 14.3556   5
  -9  -8   3 123.907 5.82720   2
   8   8  -3 1.57180 0.92270   2
   8   8  -3 -4.0191 5.30934   5
  -8  -8   3 1.77520 1.08003   2
   7   8  -3 4.17533 5.55238   5
   7   8  -3 10.2715 1.84194   2
  -7  -8   3 -3.7236 10.2610   1
   6   8  -3 5.96355 5.05665   5
   6   8  -3 5.08676 1.08700   2
  -6  -8   3 4.01547 1.09027   2
  -6  -8   3 2.24362 9.79227   1
   5   8  -3 16.1226 5.80913   5
   5   8  -3 10.4302 1.39117   2
  -5  -8   3 12.8725 1.63743   2
  -5  -8   3 10.8669 5.61570   1
   4   8  -3 326.384 12.6735   2
   4   8  -3 336.718 19.0018   5
  -4  -8   3 319.603 19.2592   1
  -4  -8   3 328.507 12.8219   2
   3   8  -3 5.08119 4.26845   5
   3   8  -3 0.33000 0.68264   2
  -3  -8   3 -1.2996 0.73216   4
  -3  -8   3 0.01286 0.76503   2
  -3  -8   3 1.47160 3.92058   1
   2   8  -3 114.945 9.54759   5
   2   8  -3 116.974 4.94524   2
  -2  -8   3 110.994 4.95056   4
  -2  -8   3 121.490 9.95462   1
  -2  -8   3 110.791 4.96672   2
   1   8  -3 36.2722 6.13294   5
   1   8  -3 33.3008 2.07154   2
  -1  -8   3 33.9872 2.09906   4
  -1  -8   3 36.3098 5.84388   1
  -1  -8   3 29.7446 2.14350   2
   0   8  -3 230.858 9.02941   2
   0   8  -3 236.845 13.6870   5
   0  -8   3 228.086 9.13033   4
   0  -8   3 224.207 12.9335   1
  -1   8  -3 53.7999 6.85219   5
  -1   8  -3 51.6050 2.54824   2
   1  -8   3 47.9608 5.38228   1
   1  -8   3 44.1942 2.62103   4
  -2   8  -3 69.0012 8.12179   5
  -2   8  -3 59.7960 2.99828   2
   2  -8   3 61.9051 3.19553   4
   2  -8   3 65.2914 5.61912   1
  -3   8  -3 1508.15 61.2382   5
  -3   8  -3 1561.39 57.3345   2
   3  -8   3 1647.18 60.7155   1
   3  -8   3 1569.60 60.2201   1
   4  -8   3 668.748 25.3814   4
   5  -8   3 49.6246 2.74054   3
   5  -8   3 40.1461 2.61055   4
   6  -8   3 26.1052 2.04794   4
   6  -8   3 25.5139 2.09003   3
   7  -8   3 -0.1048 0.81507   3
   7  -8   3 0.65308 0.81757   4
   8  -8   3 640.469 24.7972   3
   8  -8   3 658.848 24.5607   4
   9  -8   3 359.112 14.1200   4
   9  -8   3 362.386 14.5378   3
  10  -8   3 1.24505 1.05233   3
  10  -8   3 3.59597 0.94369   4
  11  -8   3 9.94765 1.37903   4
  11  -8   3 14.1005 1.95312   3
  12  -8   3 24.4944 2.27221   3
  13  -8   3 125.872 6.01106   3
 -13  -7   3 45.8956 2.49073   2
 -12  -7   3 41.2039 2.58604   2
 -11  -7   3 -0.2998 0.86913   2
 -10  -7   3 18.6187 2.04568   2
   9   7  -3 14.4264 6.82582   5
  -9  -7   3 10.6281 1.78264   2
   8   7  -3 10.7574 1.36676   2
   8   7  -3 8.74235 5.36214   5
  -8  -7   3 -10.778 13.5182   1
  -8  -7   3 5.88808 1.85017   2
   7   7  -3 313.048 18.6528   5
   7   7  -3 311.641 12.3010   2
  -7  -7   3 313.302 12.6701   2
  -7  -7   3 346.390 23.3086   1
   6   7  -3 71.3061 3.43166   2
   6   7  -3 68.1059 8.33391   5
  -6  -7   3 70.9721 3.69057   2
  -6  -7   3 57.7579 10.6264   1
   5   7  -3 2.52106 0.82315   2
   5   7  -3 2.36257 3.63870   5
  -5  -7   3 2.55319 0.90188   2
  -5  -7   3 6.40534 5.40716   1
   4   7  -3 110.072 4.81786   2
   4   7  -3 117.759 10.3756   5
  -4  -7   3 109.399 4.93316   2
  -4  -7   3 110.518 9.89298   1
   3   7  -3 310.880 11.9772   2
   3   7  -3 314.360 16.7931   5
  -3  -7   3 310.694 12.0587   2
   2   7  -3 5.11133 0.91631   2
   2   7  -3 5.21010 3.13896   5
  -2  -7   3 4.45397 3.01884   1
  -2  -7   3 6.33149 1.25460   2
   1   7  -3 0.70373 0.68666   2
   1   7  -3 0.44771 2.69501   5
  -1  -7   3 -1.5983 2.36619   1
   0   7  -3 1101.88 41.7730   2
   0   7  -3 1169.28 45.9823   5
   0  -7   3 1164.30 45.7865   1
  -1   7  -3 613.428 26.4655   5
   1  -7   3 618.913 26.0818   1
   1  -7   3 616.360 28.7084   1
  -2   7  -3 943.199 38.6490   5
   2  -7   3 987.275 38.1276   1
  -3   7  -3 122.120 9.08191   5
   3  -7   3 162.514 8.97838   1
   3  -7   3 157.282 7.73190   1
   3  -7   3 141.617 6.12305   4
   4  -7   3 453.096 17.2082   4
   5  -7   3 51.1807 2.79665   3
   5  -7   3 49.1851 2.72659   4
   6  -7   3 168.020 6.94693   4
   6  -7   3 162.133 7.03565   3
   7  -7   3 0.30880 0.88012   3
   7  -7   3 1.28574 0.79631   4
   8  -7   3 252.724 10.1796   4
   8  -7   3 252.947 10.5393   3
   9  -7   3 27.0393 2.11130   4
   9  -7   3 27.4506 2.50011   3
  10  -7   3 146.087 6.89174   3
  10  -7   3 144.681 6.24465   4
  11  -7   3 7.72189 1.37659   4
  11  -7   3 7.45121 1.56671   3
  12  -7   3 167.566 7.61490   3
  13  -7   3 10.9590 1.71314   3
  14  -7   3 0.25915 0.67994   3
 -13  -6   3 1.10793 0.74036   2
 -12  -6   3 8.79146 1.60782   2
 -11  -6   3 89.6395 4.60337   2
  10   6  -3 236.530 19.4491   5
 -10  -6   3 253.038 10.3484   2
   9   6  -3 87.9893 10.3719   5
  -9  -6   3 81.1826 4.32925   2
   8   6  -3 167.254 6.90435   2
   8   6  -3 164.900 12.3181   5
  -8  -6   3 174.050 7.39456   2
  -8  -6   3 155.447 19.8480   1
   7   6  -3 500.155 18.8306   2
   7   6  -3 504.210 24.5826   5
  -7  -6   3 504.906 27.3951   1
  -7  -6   3 497.972 19.2131   2
   6   6  -3 901.072 39.1474   5
  -6  -6   3 902.330 33.9834   2
  -6  -6   3 948.286 41.8539   1
   5   6  -3 436.966 17.0592   2
   5   6  -3 467.340 22.0992   5
  -5  -6   3 461.965 23.3450   1
  -5  -6   3 458.859 17.3095   2
   4   6  -3 42.5680 2.42044   2
   4   6  -3 41.8761 5.65290   5
  -4  -6   3 46.8002 2.59022   2
  -4  -6   3 55.3037 6.45783   1
   3   6  -3 4860.78 183.884   5
  -3  -6   3 5075.76 184.807   1
   2   6  -3 5506.97 203.213   5
  -2  -6   3 5523.08 203.687   1
   1   6  -3 7.71428 2.81869   5
  -1  -6   3 4.48446 2.58462   1
   0   6  -3 3724.70 140.923   5
   0  -6   3 3896.61 141.147   1
  -1   6  -3 368.824 16.5087   5
   1  -6   3 347.900 17.5565   1
   1  -6   3 369.473 16.2726   1
  -2   6  -3 9.14725 3.10707   5
   2  -6   3 9.75727 2.32460   1
   2  -6   3 3.14518 3.03411   1
  -3   6  -3 239.338 11.5591   5
   3  -6   3 236.571 10.9846   1
   3  -6   3 229.705 10.3869   1
  -4   6  -3 21.5197 5.23607   5
   4  -6   3 22.7831 1.65171   4
   5  -6   3 1448.91 53.3987   3
   5  -6   3 1467.65 53.3159   4
   6  -6   3 7.85393 1.29937   3
   6  -6   3 6.49630 1.14647   4
   7  -6   3 0.20082 0.89863   3
   7  -6   3 0.63212 1.20011   4
   8  -6   3 12.8200 1.79405   3
   8  -6   3 15.9714 1.55518   4
   9  -6   3 84.1603 4.71289   3
   9  -6   3 92.6416 4.23339   4
  10  -6   3 239.937 10.3227   3
  11  -6   3 25.5865 2.57455   3
  12  -6   3 482.435 19.0598   3
  13  -6   3 84.3458 4.50889   3
  14  -6   3 3.82362 1.15196   3
 -14  -5   3 86.4735 3.90044   2
 -13  -5   3 40.5431 2.55714   2
 -12  -5   3 0.02961 0.97660   2
 -11  -5   3 11.3692 1.74962   2
 -10  -5   3 134.586 6.21553   2
   9   5  -3 204.196 13.5383   5
  -9  -5   3 216.187 8.96076   2
   8   5  -3 698.509 30.9937   5
  -8  -5   3 652.379 35.9273   1
  -8  -5   3 729.674 26.3719   2
   7   5  -3 2.38116 3.66530   5
   7   5  -3 0.74097 0.76942   2
  -7  -5   3 5.70501 6.32736   1
  -7  -5   3 1.99144 0.86195   2
   6   5  -3 63.6008 6.67162   5
   6   5  -3 64.0179 3.07885   2
  -6  -5   3 64.1004 3.30581   2
  -6  -5   3 71.2133 9.11528   1
   5   5  -3 217.876 12.2162   5
   5   5  -3 206.115 8.23423   2
  -5  -5   3 205.014 13.2788   1
  -5  -5   3 215.004 8.45238   2
   4   5  -3 21.8724 2.04213   2
   4   5  -3 17.1681 4.01252   5
  -4  -5   3 19.1038 4.38663   1
   3   5  -3 889.177 36.0654   5
  -3  -5   3 884.436 36.6482   1
   2   5  -3 61.3467 5.51628   5
  -2  -5   3 67.9318 5.80291   1
   1   5  -3 864.656 33.9548   5
  -1  -5   3 831.782 34.0210   1
   0   5  -3 417.225 17.9613   5
  -1   5  -3 600.161 23.6809   5
   1  -5   3 559.691 27.6043   1
  -2   5  -3 203.260 9.66565   5
   2  -5   3 199.926 8.06557   5
  -3   5  -3 495.689 20.2981   5
   3  -5   3 515.034 19.9528   1
   3  -5   3 495.085 19.6504   1
  -4   5  -3 635.087 23.4699   5
   4  -5   3 551.114 21.9880   1
  -5   5  -3 465.107 22.0837   5
   5  -5   3 497.278 18.1494   4
   5  -5   3 468.608 18.0566   3
   6  -5   3 24.0934 1.72616   4
   6  -5   3 24.3305 1.94427   3
   7  -5   3 29.4941 1.93539   4
   7  -5   3 31.1554 2.22379   3
   8  -5   3 429.066 16.3150   4
   8  -5   3 429.837 16.8035   3
   9  -5   3 57.3540 3.56294   3
   9  -5   3 59.0077 3.01836   4
  10  -5   3 519.484 20.4331   4
  10  -5   3 538.639 20.9870   3
  11  -5   3 72.6965 4.34717   3
  12  -5   3 2.62843 1.24028   3
  13  -5   3 -0.0228 0.84324   3
  14  -5   3 26.7113 2.21507   3
 -14  -4   3 13.3710 1.43955   2
 -13  -4   3 135.072 6.00207   2
  12   4  -3 7.58662 1.40584   3
 -12  -4   3 1.52800 0.96674   2
  11   4  -3 430.762 17.4230   3
 -11  -4   3 468.757 17.5616   2
  10   4  -3 8.26524 1.60594   3
   9   4  -3 279.305 11.3198   3
   9   4  -3 270.811 14.8357   5
  -9  -4   3 283.065 11.2649   2
   8   4  -3 167.620 7.23921   3
   8   4  -3 168.510 10.7602   5
  -8  -4   3 174.067 7.21696   2
  -8  -4   3 152.710 17.9502   1
   7   4  -3 218.288 8.84332   3
   7   4  -3 235.277 12.4996   5
   7   4  -3 204.798 8.41562   2
  -7  -4   3 206.512 15.7675   1
  -7  -4   3 223.631 8.83042   2
   6   4  -3 1470.69 57.0318   5
  -6  -4   3 1439.46 58.9010   1
   5   4  -3 503.925 19.3425   2
   5   4  -3 549.449 23.0536   5
  -5  -4   3 558.393 24.4901   1
  -5  -4   3 490.256 19.7105   2
   4   4  -3 715.329 29.1014   5
  -4  -4   3 692.779 29.9632   1
   3   4  -3 3214.59 117.443   5
  -3  -4   3 3117.38 117.991   1
   2   4  -3 1212.92 47.2044   1
   2   4  -3 1209.38 46.6203   5
   1   4  -3 297.181 13.1520   5
   1   4  -3 286.401 13.4610   1
   0   4  -3 235.528 11.2846   1
   0   4  -3 252.653 11.1384   5
  -1   4  -3 893.422 34.3825   1
  -1   4  -3 883.480 34.0224   5
   1  -4   3 888.241 34.3371   1
  -2   4  -3 1847.32 67.4555   1
  -2   4  -3 1817.61 67.1917   5
   2  -4   3 1884.60 67.3092   1
   2  -4   3 1716.26 66.0672   5
  -3   4  -3 387.265 15.5089   5
  -3   4  -3 371.564 15.5706   1
   3  -4   3 389.662 15.3020   1
  -4   4  -3 1827.71 68.2758   5
   4  -4   3 1879.77 67.4745   1
  -5   4  -3 12.2298 3.06547   5
   6  -4   3 247.161 9.68809   4
   6  -4   3 252.536 9.98436   3
   7  -4   3 90.6139 4.26869   3
   7  -4   3 82.5289 3.93163   4
   8  -4   3 7.18304 1.46979   3
   8  -4   3 6.49333 1.13735   4
   9  -4   3 6.46313 1.33106   4
   9  -4   3 3.82698 1.17441   3
  10  -4   3 17.7487 2.19750   3
  11  -4   3 34.5377 2.94140   3
  12  -4   3 28.8157 2.71269   3
  13  -4   3 3.42229 1.18139   3
  14  -4   3 48.7469 3.08015   3
 -14  -3   3 29.8669 2.10039   2
  13   3  -3 12.0349 1.51433   3
 -13  -3   3 7.22547 1.28931   2
  12   3  -3 97.0271 4.92728   3
 -12  -3   3 103.910 4.90484   2
  11   3  -3 34.9421 2.63951   3
 -11  -3   3 34.5322 2.58972   2
  10   3  -3 192.265 8.48752   3
 -10  -3   3 201.490 8.37084   2
   9   3  -3 70.8969 3.79699   3
  -9  -3   3 67.7403 3.66103   2
   8   3  -3 1032.91 40.4974   5
   8   3  -3 1001.86 37.7452   3
   7   3  -3 65.5826 3.43251   3
   7   3  -3 77.1622 6.12806   5
  -7  -3   3 71.8438 9.68617   1
  -7  -3   3 66.5779 3.33925   2
   6   3  -3 6.38010 2.44126   5
  -6  -3   3 4.88097 4.25967   1
  -6  -3   3 7.94387 1.06477   2
   5   3  -3 321.833 14.8605   5
  -5  -3   3 320.201 15.9409   1
   4   3  -3 356.220 15.8501   5
  -4  -3   3 360.502 16.7656   1
   3   3  -3 5327.96 197.072   5
   3   3  -3 5474.94 200.844   1
   2   3  -3 116.595 6.53547   1
   2   3  -3 100.503 5.92629   5
   1   3  -3 92.6385 5.54258   1
   1   3  -3 94.3288 5.27512   5
   0   3  -3 364.020 14.9272   1
   0   3  -3 348.223 14.5006   5
   0  -3   3 349.596 14.9949   1
  -1   3  -3 1690.73 61.8336   5
  -1   3  -3 1627.59 62.0410   1
   1  -3   3 1700.90 62.0734   1
  -2   3  -3 313.797 13.0638   5
  -2   3  -3 311.310 13.2892   1
   2  -3   3 348.544 13.2799   5
  -3   3  -3 439.312 17.4344   5
   3  -3   3 455.351 17.5502   1
  -4   3  -3 1908.11 70.4776   5
   4  -3   3 1924.92 70.2001   1
  -5   3  -3 1974.77 72.9070   5
   6  -3   3 37.2271 2.35519   3
   7  -3   3 10.2257 1.46242   3
   8  -3   3 77.3370 4.04583   3
   9  -3   3 20.4689 2.12902   3
  10  -3   3 3.25118 1.29097   3
  11  -3   3 236.536 10.2455   3
  12  -3   3 384.150 15.5885   3
  13  -3   3 -0.8024 1.49033   3
  14  -3   3 1.64838 1.05811   3
  15  -3   3 4.44067 0.99577   3
  14   2  -3 75.5953 3.97561   3
 -14  -2   3 81.4830 4.58539   2
  13   2  -3 1.05256 0.80409   3
 -13  -2   3 -1.2716 0.80246   2
  12   2  -3 61.4156 3.70684   3
 -12  -2   3 64.7890 3.50223   2
  11   2  -3 62.1080 3.77558   3
 -11  -2   3 67.7181 3.61345   2
  10   2  -3 121.196 5.81115   3
 -10  -2   3 117.511 5.49503   2
   9   2  -3 550.009 21.4213   3
  -9  -2   3 566.124 21.1372   2
   8   2  -3 0.79853 2.50321   5
   8   2  -3 2.16830 0.90618   3
  -8  -2   3 0.64172 0.68549   2
   7   2  -3 279.935 12.5667   5
   7   2  -3 263.254 10.6381   3
  -7  -2   3 263.060 10.4113   2
  -7  -2   3 263.511 16.3803   1
   6   2  -3 113.463 6.86929   5
  -6  -2   3 120.179 9.18818   1
   5   2  -3 712.783 28.1792   5
  -5  -2   3 702.422 29.4621   1
   4   2  -3 802.892 31.3424   5
   3   2  -3 401.151 17.1407   1
   3   2  -3 404.853 16.6564   5
   2   2  -3 691.719 27.2704   1
   2   2  -3 694.530 26.8418   5
   1   2  -3 64.8029 4.09869   1
   1   2  -3 69.3966 4.00475   5
   0   2  -3 61.8266 3.82970   1
   0   2  -3 61.7463 3.58787   5
   0  -2   3 61.3957 3.87124   1
  -1   2  -3 470.096 18.4859   5
  -1   2  -3 483.677 18.7799   1
   1  -2   3 483.641 18.7973   1
  -2   2  -3 132.590 5.92038   5
  -2   2  -3 135.332 6.23301   1
   2  -2   3 118.393 6.21068   5
   2  -2   3 132.636 5.69642   5
  -3   2  -3 267.656 11.3199   1
  -3   2  -3 262.298 10.8771   5
   3  -2   3 271.673 11.1413   1
   3  -2   3 275.371 10.2495   5
   3  -2   3 245.880 10.0995   5
  -4   2  -3 126.311 6.49421   5
  -4   2  -3 133.993 7.04066   1
   4  -2   3 131.694 6.55208   1
  -5   2  -3 246.998 11.6208   1
   5  -2   3 222.562 10.4593   1
   7  -2   3 663.706 24.9546   3
  -8   2  -3 379.001 14.4050   2
  -9   2  -3 254.025 10.1609   2
   9  -2   3 262.135 10.7191   3
 -10   2  -3 0.45573 1.02073   2
  10  -2   3 -0.5041 0.92554   3
 -11   2  -3 56.2276 4.75058   2
  11  -2   3 77.3071 4.26258   3
  12  -2   3 14.9380 2.13284   3
  13  -2   3 27.7003 2.98900   3
  14  -2   3 91.6909 4.66157   3
  15  -2   3 114.144 5.10009   3
  15   1  -3 1.92248 0.99125   3
  14   1  -3 72.2606 3.73683   3
 -14  -1   3 67.4184 3.50455   2
  13   1  -3 13.7393 1.97689   3
 -13  -1   3 13.0642 1.77959   2
  12   1  -3 85.4887 4.61067   3
 -12  -1   3 84.2440 4.22239   2
  11   1  -3 15.8802 2.08041   3
  10   1  -3 118.015 5.71542   3
 -10  -1   3 112.569 5.25214   2
   9   1  -3 789.353 29.4979   3
  -9  -1   3 772.518 29.5390   2
   8   1  -3 38.0610 2.51408   3
  -8  -1   3 38.2649 2.25522   2
   7   1  -3 1000.24 37.9003   3
   7   1  -3 1100.63 41.0252   5
  -7  -1   3 995.837 37.6016   2
  -7  -1   3 1008.52 42.4593   1
   6   1  -3 57.4439 3.04775   3
   6   1  -3 57.8696 4.09888   5
   5   1  -3 2696.68 95.6008   5
  -5  -1   3 2501.36 96.8215   1
   4   1  -3 410.594 16.6232   5
   4   1  -3 409.908 17.2892   1
   3   1  -3 467.069 18.3094   5
   3   1  -3 458.118 18.7994   1
   2   1  -3 300.504 12.1704   5
   2   1  -3 294.628 12.5085   1
   1   1  -3 211.987 8.90299   5
   1   1  -3 214.506 9.23666   1
   0  -1   3 6185.03 224.098   1
  -1   1  -3 4814.33 174.789   1
  -2   1  -3 486.882 19.7248   1
  -2   1  -3 500.869 19.3632   5
   2  -1   3 534.549 19.4436   5
   2  -1   3 483.499 19.6921   1
  -3   1  -3 1089.76 40.7178   1
  -3   1  -3 1084.26 40.2969   5
   3  -1   3 1062.41 40.6528   1
   3  -1   3 1061.28 39.9960   5
  -4   1  -3 2759.98 102.942   1
   4  -1   3 3050.95 104.011   1
   4  -1   3 2572.24 101.746   5
  -5   1  -3 35.3605 4.74869   1
   5  -1   3 32.3339 2.46087   5
   5  -1   3 36.9283 4.27325   5
  -6   1  -3 20.4394 5.29922   1
   6  -1   3 18.0707 1.58177   3
   7  -1   3 1396.14 51.2902   3
  -8   1  -3 1130.35 41.7812   2
   8  -1   3 1148.01 42.3310   3
  -9   1  -3 37.9730 2.41644   2
   9  -1   3 37.3480 2.74328   3
 -10   1  -3 773.919 29.0613   2
  10  -1   3 785.125 29.6638   3
  11  -1   3 99.6618 5.24979   3
 -12   1  -3 -0.4915 0.94885   2
  12  -1   3 0.16126 1.06975   3
 -13   1  -3 43.9055 2.72326   2
  14  -1   3 3.25718 1.08582   3
  15  -1   3 128.054 5.53254   3
  15   0  -3 6.68320 1.13946   3
  14   0  -3 0.90810 0.77991   3
  13   0  -3 2.45509 0.96534   3
 -13   0   3 4.56806 1.10347   2
  12   0  -3 39.3894 2.98984   3
 -12   0   3 35.7908 2.55205   2
  11   0  -3 12.2659 2.49506   3
 -11   0   3 11.7936 1.66828   2
  10   0  -3 120.261 5.85863   3
 -10   0   3 118.577 5.38951   2
   9   0  -3 536.347 20.5064   3
  -9   0   3 524.410 19.9747   2
   8   0  -3 230.768 9.53990   3
   7   0  -3 1162.64 42.9115   3
   6   0  -3 214.181 8.62382   3
  -6   0   3 212.480 11.6308   1
   5   0  -3 5520.88 199.810   5
   4   0  -3 316.965 13.9849   1
   4   0  -3 309.652 12.4894   5
   3   0  -3 3879.90 140.277   5
   3   0  -3 3849.95 140.861   1
   2   0  -3 2219.56 80.0590   1
   2   0  -3 2142.95 79.6164   5
   0   0  -3 8.15304 1.41941   5
  -1   0  -3 91.0661 4.64628   1
   1   0   3 81.0782 4.37494   5
   1   0   3 77.5927 4.80511   1
  -2   0  -3 7.77451 1.82951   5
  -2   0  -3 7.18757 1.89307   1
   2   0   3 10.7903 1.79583   5
   2   0   3 9.97615 2.20568   1
  -3   0  -3 236.162 10.4947   1
   3   0   3 233.551 10.1679   5
   3   0   3 218.731 10.8382   1
  -4   0  -3 79.8150 5.52996   1
   4   0   3 85.4725 4.93541   5
   4   0   3 73.9665 6.16630   1
  -5   0  -3 719.527 28.7273   1
   5   0   3 642.548 29.1817   1
   5   0   3 743.160 27.7078   5
   6   0   3 967.812 36.5301   5
   6   0   3 876.019 33.9657   3
  -7   0  -3 124.935 17.2446   1
  -7   0  -3 121.795 5.52964   2
   7   0   3 148.004 7.35580   5
   7   0   3 123.300 5.64803   3
  -8   0  -3 6.32538 1.21198   2
   8   0   3 3.55983 1.05094   3
  -9   0  -3 3.58764 0.99730   2
   9   0   3 0.58159 0.95876   3
 -10   0  -3 193.887 7.83334   2
  10   0   3 178.762 8.19216   3
 -11   0  -3 791.948 29.2161   2
  11   0   3 768.987 29.7367   3
 -12   0  -3 2.91056 1.04303   2
  12   0   3 2.91813 1.15791   3
 -13   0  -3 119.817 5.33338   2
  13   0   3 120.081 5.80048   3
 -14   0  -3 34.9235 2.23226   2
  14   0   3 33.8461 2.40219   3
  15  -1  -3 175.458 7.39919   3
  14  -1  -3 33.5196 2.54267   3
  13  -1  -3 70.3668 4.10823   3
  12  -1  -3 -1.1515 0.74738   3
  11  -1  -3 117.677 5.95893   3
 -11   1   3 110.700 5.15651   2
  10  -1  -3 341.094 13.6076   3
 -10   1   3 323.409 12.8845   2
   9  -1  -3 8.70312 1.60048   3
  -9   1   3 10.4789 1.55337   2
   8  -1  -3 1589.04 57.8715   4
   7  -1  -3 105.432 4.88279   3
   6  -1  -3 601.384 22.6008   3
   4  -1  -3 245.153 10.4156   1
   3  -1  -3 673.105 25.2555   1
   3  -1  -3 647.488 25.2453   5
   2  -1  -3 2763.96 102.931   1
   2  -1  -3 2880.55 102.578   5
   0  -1  -3 877.913 33.9841   1
   0   1   3 918.012 34.5515   5
  -1  -1  -3 871.724 33.1978   1
   1   1   3 865.854 33.1728   5
  -3  -1  -3 18.2089 2.90564   1
   3   1   3 16.1033 2.63636   5
  -4  -1  -3 268.645 12.6191   1
   4   1   3 257.487 12.1441   5
  -5  -1  -3 269.943 13.6435   1
   5   1   3 280.132 13.0097   5
  -6  -1  -3 31.2369 6.14643   1
  -6  -1  -3 27.0517 1.73112   2
   6   1   3 26.0279 1.95102   3
   6   1   3 27.1069 3.81723   5
  -7  -1  -3 33.0003 2.07669   2
  -7  -1  -3 34.6180 7.71884   1
   7   1   3 37.8182 4.60949   5
   7   1   3 32.6349 2.30456   3
  -8  -1  -3 878.414 32.8839   2
   8   1   3 877.739 34.5014   5
   8   1   3 912.021 34.7018   3
  -9  -1  -3 0.80716 0.83011   2
   9   1   3 0.31769 0.89196   3
 -10  -1  -3 3.94218 1.07086   2
  10   1   3 3.54931 1.30073   3
 -11  -1  -3 9.29101 1.62878   2
  11   1   3 9.72761 1.89890   3
 -12  -1  -3 144.438 6.24262   2
  12   1   3 135.122 6.56408   3
 -13  -1  -3 5.53520 1.12005   2
  13   1   3 7.12067 1.37068   3
 -14  -1  -3 21.8044 1.76384   2
  14   1   3 23.1128 1.97966   3
  15  -2  -3 2.63337 0.86616   3
  14  -2  -3 44.1692 2.98062   3
  13  -2  -3 56.7926 3.63037   3
  12  -2  -3 171.397 7.97593   3
  11  -2  -3 374.369 15.2755   3
  10  -2  -3 341.977 13.9736   3
   9  -2  -3 99.6636 4.51410   4
   9  -2  -3 103.261 5.06751   3
   8  -2  -3 4.83078 1.12507   3
   8  -2  -3 2.91082 0.77589   4
   7  -2  -3 10.5429 1.52204   3
   7  -2  -3 11.0919 1.25851   4
   6  -2  -3 4.49284 1.00643   3
   4  -2  -3 284.014 11.4373   1
   3  -2  -3 959.052 35.8831   1
   2  -2  -3 1291.38 48.0509   1
   1  -2  -3 15.4425 1.89846   1
   0  -2  -3 2988.25 114.072   1
   0   2   3 3243.22 114.266   5
  -2  -2  -3 9294.66 337.320   1
  -3  -2  -3 37.6656 4.03012   1
   3   2   3 30.4609 3.65783   5
  -4  -2  -3 838.202 34.0424   1
   4   2   3 841.182 33.7949   5
  -5  -2  -3 45.6211 2.39388   2
   5   2   3 50.4832 5.01277   5
  -6  -2  -3 88.9821 4.12076   2
  -6  -2  -3 109.724 9.03183   1
   6   2   3 90.5543 7.00010   5
   6   2   3 94.1394 4.31708   3
  -7  -2  -3 603.542 22.8792   2
   7   2   3 603.001 23.0812   3
   7   2   3 632.444 26.6611   5
  -8  -2  -3 77.6408 3.81335   2
   8   2   3 80.7653 7.39647   5
   8   2   3 76.4986 4.76144   3
  -9  -2  -3 325.518 12.6466   2
   9   2   3 314.009 12.8713   3
 -10  -2  -3 857.314 31.2667   2
  10   2   3 791.630 31.1253   3
 -11  -2  -3 60.6791 3.37763   2
  11   2   3 53.5927 3.51186   3
 -12  -2  -3 51.3028 3.07645   2
  12   2   3 49.3346 3.26860   3
 -13  -2  -3 -0.2343 0.78957   2
  13   2   3 0.09603 0.88813   3
 -14  -2  -3 134.853 5.62573   2
  15  -3  -3 0.64946 0.68314   3
  14  -3  -3 1.13818 0.87586   3
  13  -3  -3 4.79069 1.42582   3
  12  -3  -3 280.329 11.9398   3
  11  -3  -3 432.384 17.3959   3
  10  -3  -3 300.058 12.1363   3
  10  -3  -3 278.080 11.2789   4
   9  -3  -3 462.018 18.1556   3
   8  -3  -3 328.342 12.9574   4
   8  -3  -3 351.908 14.6158   3
   7  -3  -3 32.5296 2.34802   3
   7  -3  -3 28.3621 1.89347   4
   6  -3  -3 7.18489 1.17790   3
   6  -3  -3 5.47861 0.90304   4
   4  -3  -3 274.148 11.9904   1
   2  -3  -3 290.492 12.2062   1
  -2   3   3 244.222 11.4913   5
   1  -3  -3 74.8562 4.82809   1
  -1   3   3 92.3273 5.31420   5
   0  -3  -3 1185.81 44.5646   1
   0   3   3 1144.18 44.5707   5
   1   3   3 1151.34 44.5327   5
  -2  -3  -3 97.2784 6.48355   1
   2   3   3 103.035 6.60071   5
  -3  -3  -3 272.777 13.6021   1
   3   3   3 282.704 13.7190   5
  -4  -3  -3 111.440 7.91305   1
  -4  -3  -3 104.940 4.52591   2
   4   3   3 106.391 7.49743   5
  -5  -3  -3 563.611 21.3602   2
  -5  -3  -3 582.426 25.8387   1
   5   3   3 586.762 25.5133   5
   5   3   3 565.604 21.1981   2
  -6  -3  -3 14.5490 1.49136   2
  -6  -3  -3 14.5667 4.75773   1
   6   3   3 19.9137 1.67517   3
   6   3   3 17.2440 1.42798   2
   6   3   3 18.7977 4.34724   5
  -7  -3  -3 45.4123 9.92165   1
   7   3   3 46.7288 2.54827   2
   7   3   3 50.4623 7.04267   5
   7   3   3 51.8747 2.93244   3
  -8  -3  -3 140.767 6.03798   2
   8   3   3 135.424 6.15540   3
   8   3   3 129.237 10.3042   5
  -9  -3  -3 146.008 6.40328   2
   9   3   3 142.149 6.53691   3
   9   3   3 143.565 11.2447   5
 -10  -3  -3 394.516 15.4819   2
  10   3   3 394.373 15.6928   3
 -11  -3  -3 -0.1081 0.90467   2
  11   3   3 0.73818 0.94661   3
  12   3   3 2.51229 1.12746   3
 -13  -3  -3 27.1682 2.03652   2
 -14  -3  -3 2.63877 0.76293   2
  15  -4  -3 0.33681 0.60795   3
  14  -4  -3 120.257 5.71692   3
  13  -4  -3 44.5795 3.71363   3
  12  -4  -3 30.5764 2.75346   3
  11  -4  -3 48.2174 3.32967   3
  11  -4  -3 35.5324 2.55502   4
  10  -4  -3 1.89743 1.08518   3
  10  -4  -3 1.86578 0.84394   4
   9  -4  -3 535.685 20.9686   3
   9  -4  -3 542.373 20.3207   4
   8  -4  -3 1079.32 39.0482   4
   8  -4  -3 1027.93 39.3117   3
   7  -4  -3 337.640 12.9982   4
   7  -4  -3 341.473 13.4828   3
   6  -4  -3 67.6839 3.14752   4
   6  -4  -3 63.2431 3.46677   3
   5  -4  -3 535.165 18.9649   4
   5  -4  -3 470.652 18.2643   3
  -5   4   3 439.967 19.7836   5
   4  -4  -3 103.868 4.47890   4
   4  -4  -3 108.192 4.79345   1
  -4   4   3 97.8485 6.43920   5
   3  -4  -3 6.84952 1.68945   1
  -3   4   3 4.65977 2.41310   5
   2  -4  -3 489.814 19.3423   1
  -2   4   3 451.344 19.5814   5
   1  -4  -3 774.270 30.5439   1
  -1   4   3 777.927 30.9421   5
   0  -4  -3 184.048 9.13138   1
   0   4   3 162.210 9.22817   5
  -1  -4  -3 66.8752 5.28216   1
   1   4   3 69.0856 5.65420   5
  -2  -4  -3 93.2874 6.68633   1
   2   4   3 94.4855 7.02832   5
  -3  -4  -3 984.807 37.2309   2
  -3  -4  -3 1037.38 41.2022   1
   3   4   3 1033.73 41.4381   5
  -4  -4  -3 645.012 24.7751   2
  -4  -4  -3 676.797 29.2290   1
   4   4   3 690.420 29.3906   5
  -5  -4  -3 21.1374 4.98652   1
  -5  -4  -3 21.8254 1.61124   2
   5   4   3 21.8125 1.53658   2
   5   4   3 21.8202 4.90445   5
  -6  -4  -3 559.612 27.6955   1
  -6  -4  -3 569.257 21.8884   2
   6   4   3 598.538 21.9997   3
   6   4   3 581.014 21.6474   2
   6   4   3 607.099 29.0551   5
  -7  -4  -3 53.4244 3.01853   2
  -7  -4  -3 42.2763 10.4751   1
   7   4   3 57.5163 3.14413   3
   7   4   3 51.0244 7.20415   5
   7   4   3 51.1493 2.68988   2
  -8  -4  -3 38.3997 2.64777   2
   8   4   3 39.2198 7.45830   5
   8   4   3 40.8578 2.74376   3
   8   4   3 39.3134 2.71481   2
  -9  -4  -3 36.9954 2.78999   2
   9   4   3 38.1295 2.80584   3
   9   4   3 48.5757 9.60378   5
 -10  -4  -3 94.3148 4.63120   2
  10   4   3 85.2998 4.64810   3
 -11  -4  -3 14.8560 1.91238   2
 -12  -4  -3 188.923 7.97306   2
 -13  -4  -3 40.3929 2.42187   2
  14  -5  -3 29.0423 2.26491   3
  13  -5  -3 15.8459 1.96595   3
  12  -5  -3 82.1200 4.64871   3
  11  -5  -3 46.0118 3.33800   3
  11  -5  -3 43.5377 2.70864   4
  10  -5  -3 4.87773 1.06544   4
  10  -5  -3 5.27701 2.05374   3
   9  -5  -3 0.73207 0.94515   3
   9  -5  -3 0.83948 0.78862   4
   8  -5  -3 23.1554 1.77485   4
   8  -5  -3 22.7599 2.15656   3
   7  -5  -3 82.2566 4.23409   3
   6  -5  -3 97.8254 4.28925   4
   6  -5  -3 94.9932 4.61168   3
   5  -5  -3 45.8971 2.38709   4
   5  -5  -3 42.1232 2.59374   3
   4  -5  -3 611.092 23.2267   4
   4  -5  -3 669.684 23.8080   1
   4  -5  -3 627.919 23.8015   1
  -4   5   3 597.719 25.6199   5
   3  -5  -3 527.242 19.9496   1
   3  -5  -3 458.942 17.9930   4
  -3   5   3 466.164 20.6380   5
   2  -5  -3 601.596 23.6501   1
  -2   5   3 552.583 24.1771   5
   1  -5  -3 28.9077 3.50615   1
  -1   5   3 32.0463 4.43231   5
   0  -5  -3 14.4160 3.14636   1
   0   5   3 17.0078 3.73920   5
  -1  -5  -3 1814.43 70.5503   1
   1   5   3 1878.84 71.2831   5
  -2  -5  -3 33.6216 4.80385   1
  -2  -5  -3 33.7485 2.02390   2
   2   5   3 43.4256 5.66185   5
   2   5   3 36.6491 2.16870   2
  -3  -5  -3 2044.81 79.2710   1
   3   5   3 2062.08 79.7761   5
  -4  -5  -3 1417.02 57.6209   1
   4   5   3 1448.18 58.0398   5
  -5  -5  -3 384.012 14.5869   2
  -5  -5  -3 372.536 20.1233   1
   5   5   3 389.847 26.7714   5
   5   5   3 374.328 14.3526   2
  -6  -5  -3 537.026 20.5080   2
  -6  -5  -3 511.070 26.9597   1
   6   5   3 561.078 20.3606   2
   6   5   3 548.484 26.4939   5
  -7  -5  -3 44.8561 11.9185   1
  -7  -5  -3 63.8251 3.47625   2
   7   5   3 64.0957 3.21188   2
   7   5   3 75.3146 8.87976   5
  -8  -5  -3 386.309 14.6081   2
   8   5   3 359.329 20.9112   5
   8   5   3 359.072 14.0712   2
  -9  -5  -3 511.444 18.9435   2
   9   5   3 454.048 24.8722   5
 -10  -5  -3 23.3397 2.29531   2
 -11  -5  -3 136.069 6.18471   2
 -12  -5  -3 1.48992 0.89538   2
 -13  -5  -3 113.648 4.92615   2
  14  -6  -3 0.06537 0.66347   3
  13  -6  -3 49.2971 3.16110   3
  12  -6  -3 71.4489 3.72125   4
  12  -6  -3 85.0209 4.47899   3
  11  -6  -3 101.786 5.26521   3
  11  -6  -3 94.0765 4.56423   4
  10  -6  -3 55.6994 3.11190   4
  10  -6  -3 56.1130 3.70591   3
   9  -6  -3 139.692 6.15624   4
   9  -6  -3 144.652 6.78353   3
   8  -6  -3 27.9732 2.41969   3
   8  -6  -3 25.7517 2.00150   4
   7  -6  -3 1.31379 0.73798   4
   7  -6  -3 0.21765 0.78572   3
   6  -6  -3 737.814 27.4859   3
   6  -6  -3 721.343 27.1852   4
   5  -6  -3 1355.27 49.8320   3
   4  -6  -3 29.3843 1.83492   4
   4  -6  -3 25.2379 2.65598   1
  -4   6   3 39.2340 7.22851   5
   3  -6  -3 166.645 6.82527   4
   3  -6  -3 174.819 10.5576   1
   3  -6  -3 182.514 9.02114   1
  -3   6   3 155.049 10.4118   5
   2  -6  -3 8.52290 2.42572   1
   2  -6  -3 4.85725 0.92483   4
  -2   6   3 5.53689 3.34108   5
   1  -6  -3 465.581 19.8087   1
   1  -6  -3 451.394 16.6665   4
  -1   6   3 423.320 16.5283   2
   0  -6  -3 124.082 5.25406   4
   0  -6  -3 119.882 8.04915   1
   0   6   3 130.741 5.70524   2
   0   6   3 127.204 9.21959   5
  -1  -6  -3 20.2551 3.79350   1
  -1  -6  -3 21.8382 1.75816   2
   1   6   3 26.8728 5.08956   5
   1   6   3 22.4696 1.47402   2
  -2  -6  -3 1258.70 46.4476   2
  -2  -6  -3 1245.00 51.1969   1
   2   6   3 1311.25 52.1991   5
  -3  -6  -3 187.975 7.70175   2
  -3  -6  -3 208.273 16.3092   1
   3   6   3 195.954 12.8780   5
   3   6   3 185.998 7.57949   2
  -4  -6  -3 3.46571 3.67009   1
  -4  -6  -3 2.96345 0.93420   2
   4   6   3 2.31193 0.95566   2
   4   6   3 -2.2525 3.83424   5
  -5  -6  -3 117.964 11.1755   1
  -5  -6  -3 117.221 5.34552   2
   5   6   3 121.348 5.15015   2
   5   6   3 119.958 10.6989   5
  -6  -6  -3 3.31825 1.07949   2
  -6  -6  -3 -4.4127 6.06786   1
   6   6   3 1.27072 3.71588   5
   6   6   3 2.60632 0.90222   2
  -7  -6  -3 8.11587 9.42761   1
  -7  -6  -3 12.6575 1.78513   2
   7   6   3 10.6244 1.54127   2
   7   6   3 13.1184 5.66303   5
  -8  -6  -3 4.88243 1.22933   2
   8   6   3 8.07610 6.09300   5
  -9  -6  -3 416.778 15.9322   2
   9   6   3 382.672 23.1193   5
 -10  -6  -3 259.515 10.6503   2
 -11  -6  -3 40.5321 2.70655   2
 -12  -6  -3 0.17437 0.69673   2
  14  -7  -3 34.7327 2.18258   3
  13  -7  -3 4.53575 1.12071   3
  12  -7  -3 21.4377 1.85919   4
  12  -7  -3 25.2517 2.28106   3
  11  -7  -3 42.3763 3.05692   3
  11  -7  -3 41.0123 2.55613   4
  10  -7  -3 12.3622 1.56811   4
  10  -7  -3 10.7923 1.88855   3
   9  -7  -3 183.889 8.39711   3
   9  -7  -3 190.437 7.87031   4
   8  -7  -3 89.3985 4.79741   3
   8  -7  -3 92.4216 4.38846   4
   7  -7  -3 841.796 30.9274   4
   7  -7  -3 818.913 31.2933   3
   6  -7  -3 184.407 7.59190   4
   6  -7  -3 183.596 7.85905   3
   5  -7  -3 13.3350 1.45748   4
   5  -7  -3 8.46545 1.56901   3
   4  -7  -3 89.5685 5.31835   1
   4  -7  -3 96.2240 4.98380   1
   3  -7  -3 68.0214 5.50466   1
   3  -7  -3 52.8238 9.49866   1
   3  -7  -3 62.8715 3.09505   4
  -3   7   3 58.3432 8.48243   5
   2  -7  -3 1062.82 38.9757   4
   2  -7  -3 1132.91 42.4736   1
  -2   7   3 1024.77 38.7809   2
  -2   7   3 1030.49 43.7321   5
   1  -7  -3 4.61425 0.83721   4
   1  -7  -3 4.72103 2.67806   1
  -1   7   3 2.72574 0.71813   2
  -1   7   3 3.31690 3.97880   5
   0  -7  -3 1051.10 41.9022   1
   0  -7  -3 1004.29 37.3815   4
   0   7   3 1034.31 43.1698   5
   0   7   3 998.738 37.3546   2
  -1  -7  -3 157.644 10.3048   1
  -1  -7  -3 142.400 6.36147   2
   1   7   3 146.010 6.00581   2
   1   7   3 147.304 11.1032   5
  -2  -7  -3 92.5732 8.50852   1
  -2  -7  -3 95.5930 4.37197   2
   2   7   3 110.005 9.86686   5
   2   7   3 96.6140 4.30634   2
  -3  -7  -3 815.437 36.7339   1
  -3  -7  -3 799.480 30.6306   2
   3   7   3 839.745 30.5519   2
   3   7   3 856.780 38.0060   5
  -4  -7  -3 5.55721 1.14699   2
  -4  -7  -3 2.96472 4.82886   1
   4   7   3 -0.3678 4.71164   5
   4   7   3 5.47770 1.08941   2
  -5  -7  -3 401.031 15.3189   2
  -5  -7  -3 361.338 22.3295   1
   5   7   3 415.445 22.8036   5
   5   7   3 394.992 15.0931   2
  -6  -7  -3 88.6966 13.1549   1
  -6  -7  -3 99.2195 4.67004   2
   6   7   3 92.4673 4.34233   2
   6   7   3 83.4359 10.5250   5
  -7  -7  -3 133.565 6.12295   2
  -7  -7  -3 90.2625 18.2974   1
   7   7   3 104.698 12.5180   5
   7   7   3 151.887 6.12643   2
  -8  -7  -3 6.70737 1.36591   2
   8   7   3 4.36877 1.03135   2
   8   7   3 14.7556 7.73033   5
  -9  -7  -3 1.86959 1.10885   2
 -10  -7  -3 214.538 8.94709   2
 -11  -7  -3 2.04618 0.87908   2
 -12  -7  -3 22.3038 1.65413   2
  13  -8  -3 27.5251 1.99498   3
  12  -8  -3 25.3478 2.58177   4
  12  -8  -3 29.9054 2.28759   3
  11  -8  -3 -0.3545 0.80774   3
  11  -8  -3 0.11500 0.65905   4
  10  -8  -3 41.2622 2.57118   4
  10  -8  -3 38.9098 2.92418   3
   9  -8  -3 2.61979 0.87999   4
   9  -8  -3 1.55885 0.96686   3
   8  -8  -3 3.32915 1.03943   4
   7  -8  -3 15.0462 1.70180   4
   7  -8  -3 16.4936 2.01439   3
   6  -8  -3 13.3223 1.60894   4
   6  -8  -3 13.7624 1.96014   3
   5  -8  -3 751.759 28.0550   4
   4  -8  -3 140.798 6.01825   4
  -4   8   3 139.584 5.74360   2
   3  -8  -3 325.754 15.3022   1
   3  -8  -3 322.352 12.3480   4
  -3   8   3 311.926 12.1055   2
  -3   8   3 308.201 18.7497   5
   2  -8  -3 126.961 8.83888   1
   2  -8  -3 133.621 5.54248   4
  -2   8   3 126.141 11.5441   5
  -2   8   3 127.403 5.34517   2
   1  -8  -3 59.6600 6.46403   1
   1  -8  -3 57.2620 3.02100   4
  -1   8   3 60.6390 8.70593   5
  -1   8   3 55.9675 2.82149   2
   0  -8  -3 212.369 8.54975   4
   0  -8  -3 224.796 13.0987   1
   0   8   3 210.659 8.61180   2
   0   8   3 227.429 14.9218   5
  -1  -8  -3 339.495 12.9195   4
  -1  -8  -3 337.177 18.3025   1
  -1  -8  -3 329.328 12.9577   2
   1   8   3 351.719 13.0087   2
   1   8   3 329.897 19.6684   5
  -2  -8  -3 304.621 11.6792   2
  -2  -8  -3 291.659 17.2806   1
   2   8   3 288.358 18.4822   5
   2   8   3 304.289 11.6452   2
  -3  -8  -3 866.502 40.2649   1
  -3  -8  -3 894.224 33.2934   2
   3   8   3 923.543 33.2758   2
   3   8   3 905.662 41.4959   5
  -4  -8  -3 125.657 5.72680   2
   4   8   3 132.167 12.8392   5
   4   8   3 129.696 5.63195   2
  -5  -8  -3 43.0617 11.3659   1
  -5  -8  -3 28.2912 2.30626   2
   5   8   3 25.8237 8.25921   5
   5   8   3 32.6640 2.25419   2
  -6  -8  -3 83.9808 4.33761   2
  -6  -8  -3 51.2406 15.0256   1
   6   8   3 98.7011 11.9286   5
   6   8   3 88.9577 4.16206   2
  -7  -8  -3 258.178 10.5387   2
   7   8   3 258.473 10.2494   2
   7   8   3 250.681 18.7522   5
  -8  -8  -3 132.186 6.07881   2
   8   8   3 139.161 21.2224   5
  -9  -8  -3 5.98147 1.43709   2
 -10  -8  -3 121.139 5.40498   2
 -11  -8  -3 29.6024 2.05590   2
  12  -9  -3 17.4609 1.54923   4
  10  -9  -3 4.39241 1.17189   3
  10  -9  -3 1.95911 1.15526   4
   9  -9  -3 228.263 9.12680   4
   9  -9  -3 212.923 9.32285   3
   8  -9  -3 -0.0805 0.76004   4
   8  -9  -3 2.57694 1.75168   3
   7  -9  -3 46.8551 2.87350   4
   5  -9  -3 527.897 20.0970   4
   4  -9  -3 250.766 9.79618   4
  -4   9   3 234.363 9.46066   2
   3  -9  -3 663.125 24.6858   4
   3  -9  -3 651.966 27.7004   1
  -3   9   3 658.394 24.4646   2
   2  -9  -3 11.3909 1.43280   4
   2  -9  -3 8.13928 3.96424   1
  -2   9   3 -1.4996 9.37440   5
  -2   9   3 6.77710 1.27590   2
   1  -9  -3 39.0434 6.69054   1
   1  -9  -3 47.0600 2.54273   4
  -1   9   3 41.6903 2.47964   2
  -1   9   3 59.0472 13.7010   5
   0  -9  -3 3.85273 3.96847   1
   0  -9  -3 3.38275 0.84911   4
   0   9   3 1.20484 0.76278   2
   0   9   3 -2.0440 6.12977   5
  -1  -9  -3 493.951 18.4196   4
   1   9   3 494.950 18.5465   2
   1   9   3 472.454 26.6011   5
  -2  -9  -3 936.738 35.1224   2
  -2  -9  -3 898.988 42.1551   1
   2   9   3 979.183 44.3486   5
   2   9   3 991.682 35.2761   2
  -3  -9  -3 33.7466 9.62552   1
  -3  -9  -3 38.1605 2.53176   2
   3   9   3 38.5643 10.1218   5
   3   9   3 43.0043 2.59592   2
  -4  -9  -3 19.6962 8.13507   1
  -4  -9  -3 21.8975 2.44597   2
   4   9   3 21.0015 7.64329   5
  -5  -9  -3 4.14864 1.07648   2
   5   9   3 16.7529 7.90960   5
   5   9   3 4.14981 1.03271   2
  -6  -9  -3 108.612 5.05673   2
   6   9   3 116.962 14.4499   5
   6   9   3 101.970 4.88544   2
  -7  -9  -3 42.1285 2.73601   2
   7   9   3 40.8399 2.57302   2
  -8  -9  -3 31.8338 2.32367   2
  -9  -9  -3 105.341 4.78633   2
 -10  -9  -3 20.1870 1.63413   2
  12 -10  -3 21.6361 1.54369   4
  11 -10  -3 0.36199 0.61837   4
  10 -10  -3 22.1454 1.79678   4
   9 -10  -3 66.2637 4.36842   4
   8 -10  -3 141.270 6.23780   4
   7 -10  -3 16.3516 1.73239   4
   6 -10  -3 105.784 4.98100   4
   5 -10  -3 73.1524 3.81537   4
   4 -10  -3 2.06017 0.89117   4
  -4  10   3 1.20646 0.86561   2
   3 -10  -3 210.083 11.8696   1
   3 -10  -3 208.927 8.74030   4
  -3  10   3 207.606 8.39523   2
   2 -10  -3 41.5844 2.54188   4
   2 -10  -3 35.4342 7.71162   1
  -2  10   3 42.3844 2.46765   2
   1 -10  -3 94.0251 10.1319   1
   1 -10  -3 102.193 4.61183   4
  -1  10   3 101.970 16.3741   5
  -1  10   3 101.998 4.63040   2
   0 -10  -3 59.2728 3.10250   4
   0 -10  -3 57.4468 8.73054   1
   0  10   3 61.5728 3.24840   2
   0  10   3 48.4358 13.3050   5
  -1 -10  -3 78.3923 3.76182   4
  -1 -10  -3 85.9659 10.8334   1
  -2 -10  -3 16.0140 7.09933   1
   2  10   3 5.27468 7.21359   5
   2  10   3 12.0902 1.63383   2
  -3 -10  -3 3.17429 10.2742   1
   3  10   3 2.15410 0.89357   2
   3  10   3 1.57678 7.25467   5
  -4 -10  -3 59.8187 3.30537   2
   4  10   3 38.1823 9.92928   5
   4  10   3 66.9693 3.42148   2
  -5 -10  -3 -0.4347 0.82073   2
   5  10   3 -0.1367 8.40224   5
   5  10   3 -0.0154 0.83775   2
   6  10   3 0.03602 0.81882   2
  -7 -10  -3 0.18310 0.75330   2
   7  10   3 0.23224 0.76150   2
  -8 -10  -3 4.13104 0.87632   2
   8  10   3 4.93560 1.40965   2
  -9 -10  -3 -0.4795 0.60919   2
  11 -11  -3 2.12963 0.65837   4
  10 -11  -3 0.52662 0.61578   4
   9 -11  -3 7.15522 1.28372   4
   8 -11  -3 1.10961 0.77976   4
   7 -11  -3 316.392 12.4992   4
   6 -11  -3 1.41601 0.79669   4
   5 -11  -3 1.32399 0.81104   4
   4 -11  -3 52.2856 3.03669   4
  -4  11   3 55.1537 2.93751   2
   3 -11  -3 1.92912 0.83944   4
  -3  11   3 2.56407 0.87749   2
   2 -11  -3 3.11184 6.85810   1
   2 -11  -3 2.76883 0.87923   4
  -2  11   3 1.82558 0.86230   2
   1 -11  -3 0.99527 0.76508   4
   1 -11  -3 1.08971 6.58948   1
  -1  11   3 1.25569 0.84781   2
   0 -11  -3 -0.1502 0.70195   4
   0 -11  -3 1.26439 6.96741   1
   0  11   3 0.20136 0.84075   2
   0  11   3 3.32715 11.6084   5
   1  11   3 38.1734 11.7042   5
   1  11   3 62.4350 3.29455   2
   2  11   3 17.8772 14.0228   5
   3  11   3 -0.0160 0.83837   2
   3  11   3 -3.7295 11.1347   5
   4  11   3 61.5747 3.32400   2
   5  11   3 8.20788 1.87676   2
   6  11   3 11.1144 1.46277   2
   9 -12  -3 108.563 4.78412   4
   8 -12  -3 45.5790 2.57631   4
   7 -12  -3 255.568 10.1903   4
   6 -12  -3 12.8983 1.51463   4
   5 -12  -3 354.561 14.7702   4
   4 -12  -3 260.357 10.0460   4
  -4  12   3 239.099 9.75418   2
   3 -12  -3 11.1479 1.41627   4
  -3  12   3 11.1332 1.73115   2
   2 -12  -3 13.1297 1.47648   4
  -2  12   3 14.6321 1.60030   2
   1 -12  -3 102.676 4.79935   4
  -1  12   3 91.8211 4.45802   2
   0 -12  -3 188.098 9.35780   4
   0  12   3 248.639 9.02040   2
   1  12   3 315.064 12.3653   2
   2  12   3 1.11035 1.00429   2
   3  12   3 234.308 9.42886   2
   4  12   3 66.2332 3.39334   2
   5  12   3 -0.0683 0.69328   2
   6  12   3 -0.3635 0.77970   2
   8 -13  -3 0.35479 0.43920   4
   7 -13  -3 16.2664 1.41102   4
   6 -13  -3 1.17671 0.66262   4
   5 -13  -3 9.76900 1.28621   4
   4 -13  -3 51.2937 2.74880   4
  -4  13   3 53.2655 3.44331   2
   3 -13  -3 13.2079 1.40106   4
  -3  13   3 18.0332 1.58134   2
   2 -13  -3 7.62993 1.16045   4
  -2  13   3 3.52525 0.84072   2
  -1  13   3 0.52235 0.73894   2
   0  13   3 42.8589 2.52627   2
   1  13   3 -0.4437 0.72523   2
   2  13   3 24.7363 1.90312   2
   3  13   3 28.0893 1.97406   2
   4  13   3 3.23919 0.89479   2
   5  13   3 12.9103 1.27229   2
   5 -14  -3 7.05469 0.96323   4
   4 -14  -3 0.16046 0.49993   4
   3 -14  -3 4.34522 0.92216   4
  -3  14   3 3.42488 0.88492   2
  -2  14   3 0.29012 0.60088   2
  -1  14   3 12.1369 1.29605   2
   0  14   3 0.50980 0.65731   2
   1  14   3 52.1271 2.64622   2
   2  14   3 0.50148 0.62277   2
   3  15  -4 7.44798 1.03051   2
   2  15  -4 41.0052 2.22553   2
  -1  15  -4 14.6988 1.34456   2
  -2  15  -4 42.4086 2.32062   2
   2 -15   4 47.4244 2.33988   4
  -3  15  -4 1.03631 1.19301   2
   3 -15   4 -0.3085 0.43592   4
   4 -15   4 0.43798 0.51669   4
   5 -15   4 81.5592 3.67161   4
   5  14  -4 1.16024 0.60033   2
   4  14  -4 91.9652 4.11246   2
   3  14  -4 52.6943 2.83492   2
   2  14  -4 14.4396 1.55771   2
   1  14  -4 24.3205 1.86904   2
   0  14  -4 84.9686 3.90270   2
   0 -14   4 78.8130 3.68930   4
  -1  14  -4 41.0131 2.39908   2
   1 -14   4 37.7620 2.27930   4
  -2  14  -4 106.866 4.62672   2
   2 -14   4 102.685 4.69071   4
  -3  14  -4 137.826 5.81537   2
   3 -14   4 142.785 6.04125   4
  -4  14  -4 4.73752 1.33194   2
   4 -14   4 6.55928 1.22149   4
   5 -14   4 38.9791 2.37880   4
   6 -14   4 27.6281 1.93177   4
   7 -14   4 0.09414 0.62690   4
   8 -14   4 55.9756 2.74992   4
   7  13  -4 -0.7815 0.59345   2
   6  13  -4 98.2740 4.30739   2
   5  13  -4 237.271 9.41322   2
   4  13  -4 90.0584 4.24145   2
   2  13  -4 4.13901 1.07638   2
   1  13  -4 71.4075 3.59531   2
  -1 -13   4 67.6692 3.39895   4
   0  13  -4 28.6657 2.11875   2
   0 -13   4 28.1822 2.01143   4
  -1  13  -4 80.2568 3.86787   2
   1 -13   4 79.2539 3.92706   4
  -2  13  -4 318.767 12.2442   2
   2 -13   4 309.760 12.4215   4
  -3  13  -4 72.3362 3.93255   2
   3 -13   4 74.5033 3.82749   4
  -4  13  -4 48.7725 2.76120   2
   4 -13   4 54.6988 3.07872   4
   5 -13   4 2.74748 1.33934   4
   6 -13   4 51.0687 2.96216   4
   7 -13   4 14.7176 1.59271   4
   8 -13   4 8.71240 1.23576   4
   9 -13   4 76.2195 3.53782   4
   7  12  -4 9.30156 1.38015   2
   6  12  -4 166.371 6.93615   2
   5  12  -4 49.5142 2.87809   2
   4  12  -4 2.63138 1.06105   2
   3  12  -4 2.90695 1.03092   2
   3  12  -4 2.90542 8.51144   5
   2  12  -4 4.72103 1.08356   2
   2  12  -4 7.08656 9.59661   5
  -2 -12   4 5.26558 0.96659   4
   1  12  -4 480.122 17.6819   2
   1  12  -4 458.155 28.7040   5
  -1 -12   4 421.207 25.6515   1
  -1 -12   4 464.699 17.5923   4
   0  12  -4 199.853 7.91541   2
   0  12  -4 159.530 20.1744   5
   0 -12   4 187.956 7.85601   4
   0 -12   4 175.943 15.3060   1
  -1  12  -4 26.5680 2.09661   2
   1 -12   4 26.7198 2.12503   4
   1 -12   4 21.8482 7.91870   1
  -2  12  -4 161.242 6.79257   2
   2 -12   4 158.350 12.7330   1
   2 -12   4 163.567 7.05535   4
  -3  12  -4 61.2504 3.25305   2
   3 -12   4 62.4447 3.47521   4
  -4  12  -4 139.855 6.06786   2
   4 -12   4 150.442 6.55293   4
   5 -12   4 53.9084 3.19603   4
   6 -12   4 79.5628 4.09103   4
   7 -12   4 13.9271 1.65774   4
   8 -12   4 31.3748 2.21141   4
   9 -12   4 57.6100 3.04378   4
  10 -12   4 11.8974 1.25490   4
 -10 -11   4 0.72734 0.84049   2
  -9 -11   4 70.4428 3.39262   2
  -8 -11   4 76.9615 3.78187   2
   7  11  -4 224.616 8.94026   2
  -7 -11   4 220.339 9.06744   2
  -6 -11   4 0.78696 0.95401   2
   5  11  -4 32.5433 2.36532   2
  -5 -11   4 26.7170 2.28068   2
   4  11  -4 80.2172 12.7657   5
   4  11  -4 84.7661 4.08246   2
  -4 -11   4 73.2195 14.7083   1
  -4 -11   4 77.7893 4.03247   2
   3  11  -4 30.1462 2.29646   2
   3  11  -4 18.3353 7.85154   5
  -3 -11   4 34.5685 9.88377   1
   2  11  -4 134.144 14.3218   5
   2  11  -4 156.853 6.56296   2
  -2 -11   4 147.021 14.4431   1
  -2 -11   4 150.947 6.47744   4
   1  11  -4 38.5710 9.80411   5
  -1 -11   4 20.6347 6.35537   1
  -1 -11   4 20.0883 1.82677   4
   0  11  -4 258.079 20.1122   5
   0  11  -4 275.445 10.7918   2
   0 -11   4 273.043 17.1578   1
   0 -11   4 268.348 10.8365   4
  -1  11  -4 165.004 17.7147   5
  -1  11  -4 177.786 7.36818   2
   1 -11   4 176.522 7.53929   4
   1 -11   4 178.328 13.0697   1
  -2  11  -4 59.2539 3.06342   2
   2 -11   4 47.5431 7.93340   1
   2 -11   4 55.6873 3.26690   4
  -3  11  -4 463.827 16.3643   2
   3 -11   4 388.805 17.3641   1
  -4  11  -4 342.989 13.3759   2
   4 -11   4 351.931 13.8415   4
   5 -11   4 144.349 6.50571   4
   6 -11   4 42.9844 2.87359   4
   7 -11   4 69.9725 3.80230   4
   8 -11   4 21.0813 1.91118   4
   9 -11   4 6.30693 1.30154   4
  10 -11   4 122.437 5.33594   4
  11 -11   4 0.87199 0.57425   4
 -10 -10   4 8.65544 1.34657   2
  -9 -10   4 4.81268 1.04360   2
   8  10  -4 35.4840 2.28586   2
   7  10  -4 178.484 16.1459   5
   7  10  -4 177.982 7.55865   2
  -7 -10   4 188.761 7.86724   2
   6  10  -4 55.2655 10.5672   5
   6  10  -4 38.7015 2.57527   2
  -6 -10   4 44.1750 2.83777   2
  -6 -10   4 22.2652 16.5451   1
   5  10  -4 113.687 13.1283   5
   5  10  -4 125.796 5.60381   2
  -5 -10   4 127.656 5.76533   2
  -5 -10   4 132.396 16.2952   1
   4  10  -4 170.144 16.5770   5
  -4 -10   4 156.822 15.7762   1
  -4 -10   4 183.106 7.50189   2
   3  10  -4 0.72984 0.92382   2
   3  10  -4 -2.6927 5.20798   5
  -3 -10   4 -3.1393 5.36863   1
  -3 -10   4 2.23213 0.84276   4
  -3 -10   4 -0.0453 0.93323   2
   2  10  -4 117.900 5.03118   2
   2  10  -4 116.756 12.3009   5
  -2 -10   4 98.5602 4.96446   2
  -2 -10   4 103.415 11.2347   1
  -2 -10   4 108.321 4.90624   4
   1  10  -4 97.0079 11.0145   5
   1  10  -4 93.1257 4.42119   2
  -1 -10   4 92.6951 4.39638   4
  -1 -10   4 106.712 13.2040   1
   0  10  -4 314.597 18.9933   5
   0  10  -4 314.141 11.9669   2
   0 -10   4 308.128 12.0717   4
   0 -10   4 279.543 17.1177   1
  -1  10  -4 365.950 14.3619   2
  -1  10  -4 374.135 21.7444   5
   1 -10   4 383.069 19.5681   1
   1 -10   4 376.668 14.6079   4
  -2  10  -4 83.9225 12.9374   5
  -2  10  -4 63.6239 3.30198   2
   2 -10   4 63.8906 7.25595   1
   2 -10   4 70.2618 3.63341   4
  -3  10  -4 540.594 20.4569   2
   3 -10   4 552.709 20.8165   4
   3 -10   4 538.049 22.9367   1
  -4  10  -4 243.119 9.90819   2
   4 -10   4 262.879 10.4071   4
   5 -10   4 7.73344 1.59851   4
   6 -10   4 100.668 4.95148   4
   7 -10   4 37.8717 2.70036   4
   8 -10   4 364.906 14.3915   4
   9 -10   4 196.006 8.22050   4
  10 -10   4 6.94275 1.27383   4
  11 -10   4 25.0599 2.37810   4
 -11  -9   4 16.5245 1.55811   2
 -10  -9   4 20.7780 1.88112   2
   9   9  -4 0.58363 0.90344   2
  -9  -9   4 2.43569 0.97595   2
   8   9  -4 0.68312 0.79530   2
   8   9  -4 -8.2632 6.23362   5
  -8  -9   4 0.29047 0.91967   2
   7   9  -4 356.413 13.4317   2
   7   9  -4 315.137 20.4540   5
  -7  -9   4 326.245 28.0925   1
  -7  -9   4 357.045 13.7989   2
   6   9  -4 190.018 15.3124   5
   6   9  -4 203.152 8.31073   2
  -6  -9   4 196.171 8.56277   2
  -6  -9   4 192.245 19.2206   1
   5   9  -4 63.2240 9.54266   5
   5   9  -4 65.9312 3.43105   2
  -5  -9   4 64.1437 3.53996   2
  -5  -9   4 61.1500 11.3502   1
   4   9  -4 307.367 18.8880   5
   4   9  -4 307.846 11.9311   2
  -4  -9   4 303.047 12.0364   2
  -4  -9   4 292.896 19.5768   1
   3   9  -4 167.218 13.1997   5
   3   9  -4 179.903 7.32979   2
  -3  -9   4 179.750 13.8876   1
  -3  -9   4 166.843 7.15572   4
  -3  -9   4 180.258 7.33870   2
   2   9  -4 81.7150 3.81892   2
   2   9  -4 72.2086 8.85015   5
  -2  -9   4 77.7472 3.80653   2
  -2  -9   4 77.3565 3.80675   4
  -2  -9   4 78.3091 9.05174   1
   1   9  -4 2.36238 0.84904   2
  -1  -9   4 -1.4474 0.84834   4
  -1  -9   4 1.12348 3.57298   1
   0   9  -4 486.868 24.4350   5
   0  -9   4 515.606 24.2013   1
  -1   9  -4 1.82963 0.76169   2
  -1   9  -4 4.57498 5.06684   5
   1  -9   4 2.13742 3.07432   1
   1  -9   4 1.41088 0.79618   4
  -2   9  -4 28.4994 1.92868   2
  -2   9  -4 34.2727 7.07044   5
   2  -9   4 28.1159 2.11264   4
   2  -9   4 32.2105 5.06094   1
  -3   9  -4 66.9677 3.25130   2
  -3   9  -4 73.8007 10.6978   5
   3  -9   4 59.8286 5.67040   1
   3  -9   4 66.4253 3.48168   4
  -4   9  -4 93.8836 4.36195   2
   4  -9   4 101.464 4.70385   4
   5  -9   4 66.2629 3.60610   4
   6  -9   4 798.577 29.9843   4
   7  -9   4 156.754 7.13179   3
   7  -9   4 167.256 7.12302   4
   8  -9   4 79.6764 4.40744   3
   8  -9   4 88.0403 4.28436   4
   9  -9   4 0.69797 0.79056   4
   9  -9   4 0.99093 1.02449   3
  10  -9   4 1.21283 1.07024   3
  10  -9   4 1.09169 0.74354   4
  11  -9   4 92.4964 4.18917   4
  11  -9   4 90.9616 4.69315   3
  12  -9   4 11.6081 1.88592   3
 -12  -8   4 31.2612 3.01809   2
 -11  -8   4 1.09646 0.83981   2
 -10  -8   4 19.4502 2.26214   2
   9   8  -4 -2.4412 7.51867   5
   9   8  -4 1.10098 0.92020   2
  -9  -8   4 3.79087 1.15552   2
   8   8  -4 381.783 14.9801   2
   8   8  -4 378.282 21.7843   5
  -8  -8   4 409.570 15.5209   2
   7   8  -4 153.393 6.85143   2
   7   8  -4 162.311 13.5237   5
  -7  -8   4 179.316 19.9926   1
   6   8  -4 41.5152 8.04058   5
   6   8  -4 38.8553 2.52360   2
  -6  -8   4 48.9300 11.5069   1
  -6  -8   4 43.3481 2.78114   2
   5   8  -4 530.873 26.3301   5
   5   8  -4 520.773 19.5818   2
  -5  -8   4 493.923 27.3858   1
  -5  -8   4 521.612 19.7782   2
   4   8  -4 11.2024 1.44875   2
   4   8  -4 17.0636 5.52417   5
  -4  -8   4 12.9355 5.36438   1
  -4  -8   4 11.2522 1.50982   2
   3   8  -4 54.4467 7.59473   5
   3   8  -4 57.1699 2.88742   2
  -3  -8   4 52.9910 2.90028   2
  -3  -8   4 42.8988 7.51580   1
   2   8  -4 11.4108 1.37635   2
   2   8  -4 15.1567 4.47135   5
  -2  -8   4 13.3463 1.48594   2
  -2  -8   4 11.0505 4.33182   1
   1   8  -4 936.975 39.0695   5
   1   8  -4 923.598 33.7804   2
  -1  -8   4 953.448 39.3817   1
  -1  -8   4 860.526 33.6728   2
   0   8  -4 766.027 28.7249   2
   0   8  -4 760.650 33.3911   5
   0  -8   4 806.781 33.5965   1
  -1   8  -4 61.9662 7.19197   5
  -1   8  -4 64.2728 3.10289   2
   1  -8   4 69.2318 6.38809   1
  -2   8  -4 279.076 10.8935   2
  -2   8  -4 281.307 15.2853   5
   2  -8   4 290.031 14.1748   1
  -3   8  -4 5.67831 4.80000   5
   3  -8   4 0.91322 5.37366   1
   3  -8   4 0.42700 1.98952   1
   3  -8   4 0.64078 0.78656   4
  -4   8  -4 3.89862 1.41098   2
   4  -8   4 9.19302 1.98718   1
   4  -8   4 9.10453 1.77525   1
   4  -8   4 6.67037 1.18840   4
   5  -8   4 236.993 9.77380   3
   5  -8   4 248.799 9.85710   4
   6  -8   4 345.299 13.5242   4
   6  -8   4 342.080 14.0192   3
   7  -8   4 816.427 31.0329   3
   7  -8   4 835.132 30.9070   4
   8  -8   4 8.57714 1.53398   3
   8  -8   4 9.84645 1.59044   4
   9  -8   4 43.8127 3.12322   3
   9  -8   4 45.3626 2.76857   4
  10  -8   4 5.86923 1.07115   4
  10  -8   4 2.53639 1.09957   3
  11  -8   4 4.34001 1.83069   3
  11  -8   4 4.29547 0.91232   4
  12  -8   4 86.1770 4.50687   3
  13  -8   4 75.4795 3.88425   3
 -13  -7   4 67.6582 3.26296   2
 -12  -7   4 171.776 7.24270   2
 -11  -7   4 -0.2877 0.89131   2
 -10  -7   4 133.142 6.15358   2
   9   7  -4 0.28109 5.90567   5
  -9  -7   4 -0.0468 0.95428   2
   8   7  -4 45.5395 8.72715   5
   8   7  -4 48.2333 2.76066   2
  -8  -7   4 57.7733 22.5240   1
   7   7  -4 80.1672 3.93155   2
   7   7  -4 82.4548 9.39741   5
  -7  -7   4 75.4929 14.6598   1
  -7  -7   4 85.0766 4.28167   2
   6   7  -4 0.90386 0.79420   2
   6   7  -4 -0.5194 3.79113   5
  -6  -7   4 0.33910 0.80409   2
  -6  -7   4 8.92797 6.28075   1
   5   7  -4 1051.69 43.8420   5
   5   7  -4 1004.57 37.6764   2
  -5  -7   4 1022.37 37.8917   2
  -5  -7   4 1021.87 45.3091   1
   4   7  -4 291.570 11.4880   2
   4   7  -4 296.743 17.5598   5
  -4  -7   4 311.697 17.8730   1
  -4  -7   4 293.779 11.6194   2
   3   7  -4 195.413 7.75918   2
   3   7  -4 193.371 12.2126   5
  -3  -7   4 190.813 7.79624   2
   2   7  -4 378.440 14.2912   2
   2   7  -4 382.691 18.6850   5
  -2  -7   4 382.669 19.3016   1
  -2  -7   4 364.404 14.2768   2
   1   7  -4 844.701 34.9522   5
   1   7  -4 811.821 30.6561   2
  -1  -7   4 845.852 35.3587   1
   0   7  -4 1492.84 58.9472   5
   0  -7   4 1527.30 59.1843   1
  -1   7  -4 114.601 10.3118   5
  -1   7  -4 118.405 4.98209   2
   1  -7   4 125.887 8.11431   1
  -2   7  -4 1583.62 62.1090   5
   2  -7   4 1645.89 61.7870   1
  -3   7  -4 226.901 12.2087   5
   3  -7   4 226.035 11.9945   1
   3  -7   4 219.746 10.6707   1
  -4   7  -4 80.4552 8.55023   5
   4  -7   4 105.744 5.10384   1
   4  -7   4 95.4709 4.55025   4
   4  -7   4 110.696 6.02465   1
   5  -7   4 13.1225 1.48971   3
   5  -7   4 10.1652 1.38410   4
   6  -7   4 8.16137 1.43144   3
   6  -7   4 8.46630 1.35308   4
   7  -7   4 808.452 30.6919   3
   7  -7   4 826.238 30.4945   4
   8  -7   4 297.978 11.8210   4
   8  -7   4 297.634 12.1697   3
   9  -7   4 306.515 12.9299   3
   9  -7   4 312.830 12.2314   4
  10  -7   4 340.104 14.0970   3
  10  -7   4 351.038 13.4498   4
  11  -7   4 -0.3465 0.94982   3
  12  -7   4 60.8017 3.73894   3
  13  -7   4 4.38531 1.04428   3
  14  -7   4 26.3459 1.98900   3
 -13  -6   4 1.20934 0.74913   2
 -12  -6   4 40.5856 2.66674   2
 -11  -6   4 59.1988 3.46298   2
  10   6  -4 30.3614 11.0970   5
 -10  -6   4 33.2999 2.61824   2
   9   6  -4 58.0703 9.22207   5
  -9  -6   4 62.9736 3.63072   2
   8   6  -4 24.0389 5.88646   5
   8   6  -4 21.2956 1.84363   2
  -8  -6   4 62.1344 17.3621   1
  -8  -6   4 20.3011 2.09228   2
   7   6  -4 195.505 8.06106   2
   7   6  -4 201.139 13.1832   5
  -7  -6   4 207.294 17.0063   1
  -7  -6   4 208.769 8.50089   2
   6   6  -4 481.722 23.6479   5
  -6  -6   4 493.818 27.2470   1
  -6  -6   4 509.129 18.9667   2
   5   6  -4 240.357 9.31304   2
   5   6  -4 235.089 13.5553   5
  -5  -6   4 231.422 9.45872   2
  -5  -6   4 243.033 15.4633   1
   4   6  -4 535.406 24.1758   5
   4   6  -4 508.400 19.5717   2
  -4  -6   4 520.872 19.7319   2
  -4  -6   4 540.073 25.3777   1
   3   6  -4 56.7152 2.80976   2
   3   6  -4 65.0539 6.20962   5
  -3  -6   4 57.6066 6.29121   1
  -3  -6   4 56.5142 2.93887   2
   2   6  -4 295.523 14.6197   5
   2   6  -4 282.469 10.8710   2
  -2  -6   4 293.094 15.0363   1
  -2  -6   4 269.336 10.8835   2
   1   6  -4 1653.45 63.5778   5
  -1  -6   4 1648.73 63.9622   1
   0   6  -4 2030.21 76.8680   5
  -1   6  -4 2210.88 82.8446   5
   1  -6   4 2198.77 83.7810   1
  -2   6  -4 126.563 7.69914   5
   2  -6   4 117.827 6.17531   5
  -3   6  -4 400.632 17.5320   5
   3  -6   4 416.192 17.4202   1
   3  -6   4 389.595 16.7317   1
  -4   6  -4 10.3925 3.70179   5
   4  -6   4 6.85601 1.89558   1
   4  -6   4 10.1444 2.05519   1
   5  -6   4 142.611 6.41919   3
   5  -6   4 149.318 6.15421   4
   6  -6   4 429.207 16.4784   3
   6  -6   4 425.420 16.2907   4
   7  -6   4 245.044 10.1002   3
   8  -6   4 54.9527 2.96250   4
   8  -6   4 54.2235 3.31332   3
   9  -6   4 226.688 9.07660   4
   9  -6   4 222.915 9.67028   3
  10  -6   4 15.8150 2.14047   3
  10  -6   4 17.8267 2.53687   4
  11  -6   4 2.48338 1.14597   3
  12  -6   4 374.435 15.1699   3
  13  -6   4 41.4308 2.91187   3
  14  -6   4 8.69986 1.48575   3
 -14  -5   4 64.3150 3.12072   2
 -13  -5   4 58.0464 3.17677   2
 -12  -5   4 0.06100 1.38111   2
 -11  -5   4 144.598 6.58611   2
 -10  -5   4 114.259 5.49128   2
   9   5  -4 931.822 39.8370   5
   9   5  -4 940.059 35.7017   3
  -9  -5   4 1001.52 35.8657   2
   8   5  -4 379.922 14.9887   3
   8   5  -4 393.842 19.6182   5
  -8  -5   4 386.389 15.0680   2
  -8  -5   4 375.175 25.9574   1
   7   5  -4 769.838 32.4768   5
   7   5  -4 710.099 27.4160   2
  -7  -5   4 757.501 27.8568   2
  -7  -5   4 740.722 35.5850   1
   6   5  -4 1047.55 39.1979   2
   6   5  -4 1104.37 43.9781   5
  -6  -5   4 1072.30 39.5011   2
  -6  -5   4 1061.13 45.9776   1
   5   5  -4 1.15492 2.56912   5
   5   5  -4 1.26607 0.71322   2
  -5  -5   4 -2.1034 3.58451   1
  -5  -5   4 0.88940 0.68062   2
   4   5  -4 16.2018 3.74530   5
  -4  -5   4 15.4107 4.38389   1
  -4  -5   4 13.1012 1.37744   2
   3   5  -4 220.481 8.79066   2
   3   5  -4 245.031 12.1720   5
  -3  -5   4 240.080 12.7494   1
  -3  -5   4 215.581 8.85314   2
   2   5  -4 5241.73 192.416   5
   1   5  -4 8184.95 291.328   1
   1   5  -4 7764.13 290.304   5
   0   5  -4 716.996 29.6490   1
   0   5  -4 728.117 29.0370   5
  -1   5  -4 79.2675 5.49755   5
  -1   5  -4 82.0210 6.11080   1
   1  -5   4 81.1876 6.74099   1
  -2   5  -4 461.054 19.6813   1
  -2   5  -4 463.106 19.2361   5
  -3   5  -4 68.4831 8.36494   1
  -4   5  -4 1.42607 2.59470   5
   4  -5   4 5.15988 1.81822   1
  -5   5  -4 1591.01 59.9683   5
   5  -5   4 1609.03 58.5008   3
   7  -5   4 364.965 14.0145   3
   7  -5   4 345.400 13.6092   4
   8  -5   4 506.892 19.3581   3
   8  -5   4 490.760 18.8076   4
   9  -5   4 214.417 9.09656   3
   9  -5   4 203.379 8.35810   4
  10  -5   4 71.7147 5.30492   3
  11  -5   4 -0.1801 0.99197   3
  12  -5   4 159.504 7.47348   3
  13  -5   4 413.821 16.4654   3
  14  -5   4 55.2041 3.22990   3
 -14  -4   4 4.17576 0.87293   2
 -13  -4   4 274.374 10.9732   2
  12   4  -4 163.156 7.23396   3
 -12  -4   4 176.621 7.41361   2
  11   4  -4 42.7802 2.82248   3
 -11  -4   4 44.0438 2.94219   2
  10   4  -4 126.291 6.92210   3
 -10  -4   4 118.203 6.77456   2
   9   4  -4 54.7852 7.37485   5
   9   4  -4 58.5707 3.43870   3
  -9  -4   4 59.1382 3.36407   2
   8   4  -4 98.9343 4.82085   3
   8   4  -4 101.097 8.16555   5
  -8  -4   4 103.109 4.79460   2
   7   4  -4 3.13521 0.84114   2
   7   4  -4 3.59315 0.97238   3
   7   4  -4 3.56691 2.79364   5
  -7  -4   4 11.5939 7.17363   1
  -7  -4   4 4.96409 1.02084   2
   6   4  -4 967.524 38.4751   5
  -6  -4   4 932.957 40.5724   1
  -6  -4   4 930.362 34.8056   2
   5   4  -4 129.492 8.22721   5
   5   4  -4 117.715 5.10853   2
  -5  -4   4 126.927 5.30719   2
  -5  -4   4 135.147 9.56614   1
   4   4  -4 1089.03 42.0426   5
  -4  -4   4 1126.34 43.3520   1
  -4  -4   4 979.049 39.0087   2
   3   4  -4 802.526 32.2060   1
   3   4  -4 744.056 31.0924   5
   2   4  -4 995.035 39.6201   5
   2   4  -4 1041.50 40.4836   1
   1   4  -4 958.836 37.1714   5
   1   4  -4 954.381 37.7600   1
   0   4  -4 1374.93 52.1207   1
   0   4  -4 1350.42 51.4943   5
  -1   4  -4 1758.41 64.2940   5
   1  -4   4 1686.52 64.6473   1
  -2   4  -4 5080.34 194.158   1
  -2   4  -4 5503.85 194.005   5
   2  -4   4 5402.95 194.123   5
  -3   4  -4 70.7038 5.45526   1
  -3   4  -4 72.4489 4.72433   5
   3  -4   4 75.5007 4.84059   1
  -4   4  -4 263.186 11.4183   5
   4  -4   4 251.764 10.9795   1
  -5   4  -4 528.665 21.4078   5
   5  -4   4 519.996 19.8822   3
   5  -4   4 536.420 20.0752   1
  -6   4  -4 1489.96 54.8253   5
   6  -4   4 1397.12 52.6083   4
   7  -4   4 317.253 12.3160   3
   7  -4   4 301.446 11.8670   4
   8  -4   4 46.2908 2.53190   4
   8  -4   4 47.6487 3.00244   3
   9  -4   4 216.124 9.29967   3
  10  -4   4 7.93995 1.74778   3
  11  -4   4 0.90724 1.11326   3
  12  -4   4 78.0397 4.49127   3
  13  -4   4 40.3119 3.01154   3
  14  -4   4 240.801 9.97092   3
 -14  -3   4 6.75515 1.28984   2
  13   3  -4 20.8906 1.86895   3
 -13  -3   4 20.0611 1.93814   2
  12   3  -4 94.4618 4.86973   3
 -12  -3   4 103.923 4.87692   2
  11   3  -4 53.2504 3.37664   3
 -11  -3   4 57.1125 3.32953   2
  10   3  -4 329.789 13.3853   3
 -10  -3   4 332.351 13.1845   2
   9   3  -4 33.5968 2.47640   3
  -9  -3   4 32.0340 2.37456   2
   8   3  -4 63.1586 5.96502   5
   8   3  -4 52.7025 3.11972   3
  -8  -3   4 56.6781 3.27139   2
   7   3  -4 100.296 4.71445   3
   7   3  -4 109.247 7.40545   5
  -7  -3   4 113.170 13.0314   1
  -7  -3   4 99.5443 4.59033   2
   6   3  -4 435.120 19.0066   5
   6   3  -4 414.731 16.2952   3
  -6  -3   4 443.042 21.2633   1
  -6  -3   4 423.710 16.1833   2
   5   3  -4 1188.06 45.3620   5
  -5  -3   4 1127.66 42.5819   2
  -5  -3   4 1179.90 46.8644   1
   4   3  -4 966.308 38.9114   5
   4   3  -4 1030.08 40.1133   1
   3   3  -4 172.745 9.50941   1
   3   3  -4 180.580 9.01903   5
   2   3  -4 9.71879 2.59052   1
   2   3  -4 11.0190 2.42395   5
   1   3  -4 317.540 13.5149   5
   1   3  -4 310.116 13.9223   1
   0   3  -4 510.901 20.7658   1
   0   3  -4 507.599 20.3258   5
  -1   3  -4 80.5200 4.62254   5
   1  -3   4 78.2102 5.10973   1
  -2   3  -4 261.361 11.4349   1
  -2   3  -4 251.532 10.9608   5
   2  -3   4 261.795 11.4237   1
  -3   3  -4 239.589 10.2988   5
  -3   3  -4 250.820 10.8884   1
   3  -3   4 216.104 9.20129   5
   3  -3   4 236.020 9.23028   5
   3  -3   4 245.285 10.6026   1
  -4   3  -4 105.815 5.87336   5
   4  -3   4 101.666 7.82802   1
  -5   3  -4 104.323 6.41926   5
   5  -3   4 99.7647 4.51103   3
   5  -3   4 97.1027 5.80391   1
   6  -3   4 538.653 20.3639   3
   7  -3   4 211.958 8.76528   3
   8  -3   4 19.0443 1.92414   3
   9  -3   4 131.450 6.18693   3
  10  -3   4 50.0114 3.39174   3
  11  -3   4 180.597 8.23275   3
  12  -3   4 163.022 7.59568   3
  13  -3   4 42.3833 3.17244   3
  14  -3   4 3.57703 0.96230   3
  14   2  -4 50.7332 3.07884   3
 -14  -2   4 59.1428 3.22880   2
  13   2  -4 27.3345 2.25058   3
 -13  -2   4 26.3732 2.15507   2
  12   2  -4 107.434 5.39491   3
 -12  -2   4 111.501 5.15867   2
  11   2  -4 159.320 7.40561   3
 -11  -2   4 165.242 7.08942   2
  10   2  -4 116.822 5.80533   3
 -10  -2   4 123.672 5.54696   2
   9   2  -4 31.9999 2.40283   3
  -9  -2   4 29.3127 2.19837   2
   8   2  -4 158.474 6.88033   3
   8   2  -4 159.370 8.31328   5
  -8  -2   4 154.127 6.58290   2
   7   2  -4 1575.29 57.1862   5
   7   2  -4 1458.61 55.2134   3
  -7  -2   4 1489.57 54.9920   2
  -7  -2   4 1500.24 60.6010   1
   6   2  -4 27.4805 3.44384   5
   6   2  -4 20.7206 1.71774   3
  -6  -2   4 20.2868 5.25753   1
  -6  -2   4 23.1615 1.65260   2
   5   2  -4 9.82759 2.64625   5
   4   2  -4 1579.97 61.3227   1
   4   2  -4 1638.87 60.4968   5
   3   2  -4 607.112 26.7537   1
   3   2  -4 666.115 25.2733   5
   2   2  -4 697.957 27.2357   1
   2   2  -4 669.117 26.5696   5
   1   2  -4 4.96805 1.56717   1
   1   2  -4 7.05279 1.65961   5
   0   2  -4 72.5373 4.38893   1
   0   2  -4 70.5227 4.12507   5
  -1   2  -4 29.1901 2.76345   1
  -1   2  -4 28.0053 2.47441   5
   1  -2   4 29.2961 3.13316   1
  -2   2  -4 1967.30 72.9176   1
  -2   2  -4 1902.34 72.4043   5
   2  -2   4 1927.96 72.8566   1
   2  -2   4 2068.96 72.3942   5
  -3   2  -4 209.105 9.96752   1
  -3   2  -4 210.484 9.71141   5
   3  -2   4 212.181 8.94979   5
   3  -2   4 210.576 9.88715   1
  -4   2  -4 4567.01 164.651   5
  -4   2  -4 4602.04 165.236   1
   4  -2   4 4465.91 163.510   5
   4  -2   4 4419.64 163.355   5
  -5   2  -4 4527.87 161.819   1
   5  -2   4 4272.95 161.099   1
   6  -2   4 1498.48 57.0714   1
  -8   2  -4 372.490 14.2395   2
   8  -2   4 373.727 14.7204   3
  -9   2  -4 53.4135 3.02324   2
   9  -2   4 54.4565 3.37943   3
 -10   2  -4 27.8587 2.29022   2
  10  -2   4 27.6992 2.56312   3
 -11   2  -4 11.4920 1.83643   2
  11  -2   4 9.22943 1.89868   3
 -12   2  -4 415.692 18.8482   2
  12  -2   4 521.225 18.8292   3
  13  -2   4 746.517 28.5816   3
  14  -2   4 2.19293 0.97046   3
  15   1  -4 1.81824 1.12649   3
  14   1  -4 164.295 6.93155   3
 -14  -1   4 151.135 6.49403   2
 -13  -1   4 161.679 6.87749   2
  12   1  -4 66.7777 3.91782   3
 -12  -1   4 63.3388 3.48671   2
  11   1  -4 1.59802 1.07202   3
  10   1  -4 93.7513 4.90933   3
 -10  -1   4 92.8046 4.48827   2
   9   1  -4 7.74094 1.53470   3
   8   1  -4 524.545 19.6477   3
  -8  -1   4 496.522 19.2143   2
   7   1  -4 109.114 5.09418   3
  -7  -1   4 117.852 11.6024   1
  -7  -1   4 113.154 4.84898   2
   6   1  -4 560.544 21.9696   3
  -6  -1   4 615.804 25.9633   1
   5   1  -4 2176.07 83.2688   1
   5   1  -4 2266.32 82.0770   5
   4   1  -4 30.3711 2.79094   5
   4   1  -4 26.5664 3.09292   1
   3   1  -4 639.371 25.3123   1
   3   1  -4 626.935 24.5343   5
   2   1  -4 939.259 35.6660   1
   2   1  -4 919.203 35.0463   5
   1   1  -4 339.530 14.2682   1
   1   1  -4 346.162 13.8624   5
   0   1  -4 134.961 6.31954   5
   0   1  -4 137.817 6.69997   1
  -1   1  -4 333.639 12.8305   5
  -1   1  -4 303.982 13.1940   1
   1  -1   4 295.751 13.2034   1
  -2   1  -4 844.574 33.5063   1
  -2   1  -4 862.365 33.0137   5
   2  -1   4 935.818 33.2244   5
   2  -1   4 835.515 33.5221   1
  -3   1  -4 467.347 19.0864   5
   3  -1   4 470.897 18.9680   5
   3  -1   4 488.565 20.7897   1
  -4   1  -4 852.969 34.5927   1
   4  -1   4 926.399 33.7261   5
   4  -1   4 862.138 34.7907   1
  -5   1  -4 60.4257 6.26361   1
   5  -1   4 50.7905 3.74673   5
   5  -1   4 56.7616 6.57528   1
  -6   1  -4 1930.95 73.9643   1
   6  -1   4 1891.44 70.6222   5
   6  -1   4 1964.80 70.5316   5
  -7   1  -4 50.6335 2.62215   2
   7  -1   4 47.2406 2.91442   3
  -8   1  -4 649.988 24.0814   2
   8  -1   4 640.384 24.5010   3
  -9   1  -4 340.244 12.7242   2
   9  -1   4 298.236 12.8457   3
 -10   1  -4 162.845 6.96181   2
  10  -1   4 162.140 7.44398   3
 -11   1  -4 20.0942 2.04754   2
  11  -1   4 16.5944 2.26214   3
 -12   1  -4 1.56816 0.99848   2
  12  -1   4 0.95469 1.09440   3
 -13   1  -4 141.880 6.22787   2
  13  -1   4 153.892 6.90169   3
  14  -1   4 1.23304 0.89318   3
  15   0  -4 0.67652 0.60310   3
  14   0  -4 20.2011 1.98715   3
  13   0  -4 235.957 9.90206   3
 -13   0   4 225.108 9.24257   2
  12   0  -4 16.7905 2.16111   3
 -12   0   4 14.3830 1.79437   2
  11   0  -4 97.4314 5.18331   3
 -11   0   4 95.8376 4.61430   2
  10   0  -4 1057.06 39.0403   3
 -10   0   4 1021.14 38.4115   2
   9   0  -4 6.64350 1.38478   3
  -9   0   4 5.90407 1.13661   2
   8   0  -4 155.430 6.79968   3
  -8   0   4 151.057 6.37858   2
   7   0  -4 866.294 32.3031   3
   6   0  -4 582.959 22.3545   3
  -6   0   4 608.663 25.5571   1
   5   0  -4 2122.68 80.1021   1
   5   0  -4 2176.95 78.8072   5
   4   0  -4 74.8528 4.97929   1
   4   0  -4 89.9365 4.56672   5
   3   0  -4 1224.21 46.2518   5
   3   0  -4 1264.10 46.9678   1
   1   0  -4 1134.96 42.6727   1
   1   0  -4 1128.87 42.2740   5
   0   0  -4 1565.33 58.4497   1
   0   0  -4 1570.09 58.0316   5
  -1   0  -4 357.299 14.8108   5
  -1   0  -4 354.472 15.1469   1
   1   0   4 376.935 15.0165   5
  -2   0  -4 5892.02 217.049   1
  -2   0  -4 6032.88 216.616   5
  -3   0  -4 1311.42 49.8069   1
   3   0   4 1301.11 49.4419   5
  -4   0  -4 735.604 29.1110   1
   4   0   4 698.349 28.3530   5
  -5   0  -4 242.975 12.2930   1
   5   0   4 224.635 11.8615   5
  -6   0  -4 16.9357 1.54286   2
  -6   0  -4 18.5400 5.12961   1
   6   0   4 11.9898 2.62541   5
   6   0   4 11.3977 1.49800   3
  -7   0  -4 717.555 26.8700   2
   7   0   4 741.534 28.4576   5
   7   0   4 717.968 27.2052   3
  -8   0  -4 207.739 8.37824   2
   8   0   4 208.283 8.77643   3
  -9   0  -4 15.8504 1.64016   2
   9   0   4 13.6265 1.89144   3
 -10   0  -4 32.5679 2.32804   2
  10   0   4 26.8204 2.55914   3
 -11   0  -4 127.471 5.80661   2
  11   0   4 130.001 6.32753   3
 -12   0  -4 4.62013 1.18859   2
  12   0   4 4.96716 1.45646   3
 -13   0  -4 1.41149 0.87938   2
  13   0   4 -0.1593 0.90778   3
 -14   0  -4 2.01958 0.97115   2
  14   0   4 1.68629 1.05890   3
  15  -1  -4 57.8766 3.13225   3
  14  -1  -4 -0.0857 0.80778   3
  13  -1  -4 194.910 8.68787   3
  12  -1  -4 19.0519 2.23488   3
  11  -1  -4 154.800 7.19120   3
 -11   1   4 146.019 6.44640   2
  10  -1  -4 263.222 10.8310   3
 -10   1   4 245.594 10.1002   2
   9  -1  -4 156.277 6.71972   4
   9  -1  -4 172.460 7.44805   3
  -9   1   4 164.955 6.82458   2
   8  -1  -4 845.738 32.2345   4
   8  -1  -4 911.359 32.8885   3
  -8   1   4 870.600 32.2823   2
   7  -1  -4 42.5572 2.46253   4
   7  -1  -4 52.6765 2.92893   3
  -6   1   4 2784.72 104.922   1
   5  -1  -4 1110.72 42.1727   1
   4  -1  -4 1080.06 40.9299   1
   3  -1  -4 225.497 10.1880   1
   3  -1  -4 238.397 9.64165   5
   2  -1  -4 43.0317 3.19274   1
   2  -1  -4 44.2736 3.02248   5
   1  -1  -4 3403.59 122.180   5
   1  -1  -4 3292.84 122.545   1
  -1  -1  -4 4496.94 164.014   1
   1   1   4 4482.40 163.898   5
  -2  -1  -4 8620.29 313.024   1
  -3  -1  -4 1537.11 60.5515   1
   3   1   4 1658.68 60.6217   5
  -4  -1  -4 251.104 12.5029   1
   4   1   4 241.709 11.9222   5
  -5  -1  -4 27.2884 4.93511   1
   5   1   4 18.6382 3.44447   5
  -6  -1  -4 706.014 30.3284   1
   6   1   4 685.726 28.4095   5
   6   1   4 665.449 25.5736   3
  -7  -1  -4 2304.69 91.3098   1
   7   1   4 2397.22 88.5907   5
  -8  -1  -4 18.2469 2.58515   2
   8   1   4 16.3288 1.88324   3
   8   1   4 20.2727 5.22960   5
  -9  -1  -4 3.50301 1.03848   2
   9   1   4 3.72196 1.29260   3
 -10  -1  -4 134.932 5.96994   2
  10   1   4 129.086 6.31861   3
 -11  -1  -4 224.064 9.04620   2
  11   1   4 209.510 9.39784   3
 -12  -1  -4 335.899 13.0927   2
  12   1   4 327.852 13.4637   3
 -13  -1  -4 -0.4153 0.73385   2
  13   1   4 1.20144 0.91567   3
 -14  -1  -4 123.174 5.08260   2
  14   1   4 115.043 5.25251   3
  15  -2  -4 101.935 4.77154   3
  14  -2  -4 371.128 14.8322   3
  13  -2  -4 2.43514 0.98513   3
  12  -2  -4 242.848 10.5787   3
  11  -2  -4 0.70174 0.96570   3
  10  -2  -4 116.341 5.42604   4
  10  -2  -4 136.299 6.23846   3
   9  -2  -4 15.9797 1.95292   3
   9  -2  -4 16.7064 1.65079   4
   8  -2  -4 24.0022 1.73900   4
   7  -2  -4 1412.18 51.5185   4
   6  -2  -4 898.150 33.0449   3
   6  -2  -4 879.819 32.6107   4
   5  -2  -4 667.501 25.6911   1
   4  -2  -4 189.776 8.60902   1
   3  -2  -4 714.945 27.6413   1
   2  -2  -4 663.384 25.9975   1
   1  -2  -4 1461.79 54.5711   1
  -1   2   4 1441.77 54.4645   5
  -1  -2  -4 2782.22 103.937   1
   1   2   4 2839.07 104.076   5
  -2  -2  -4 5364.55 196.479   1
   2   2   4 5374.00 196.530   5
  -3  -2  -4 52.2034 5.12029   1
   3   2   4 66.1590 5.23443   5
  -4  -2  -4 332.906 15.9078   1
   4   2   4 318.054 15.4270   5
   5   2   4 124.005 8.26721   5
  -6  -2  -4 105.339 4.70347   2
  -6  -2  -4 120.133 9.92905   1
   6   2   4 111.563 4.96503   3
   6   2   4 103.981 4.59084   2
   6   2   4 115.126 8.25821   5
  -7  -2  -4 301.446 11.9322   2
  -7  -2  -4 296.025 18.7157   1
   7   2   4 309.183 12.1865   3
   7   2   4 317.936 16.0000   5
  -8  -2  -4 253.642 10.2509   2
   8   2   4 259.759 14.1996   5
   8   2   4 256.499 10.5349   3
  -9  -2  -4 61.8414 3.39093   2
   9   2   4 62.8380 3.67708   3
   9   2   4 53.1649 8.74580   5
 -10  -2  -4 60.7688 3.46640   2
  10   2   4 56.8310 3.77684   3
 -11  -2  -4 108.690 5.01998   2
  11   2   4 97.1700 5.16286   3
 -12  -2  -4 3.28481 1.59911   2
  12   2   4 3.11094 1.11071   3
 -13  -2  -4 -0.6762 0.71079   2
  13   2   4 -1.5883 0.98946   3
 -14  -2  -4 60.2996 2.95532   2
  15  -3  -4 0.68901 0.71130   3
  14  -3  -4 5.94645 1.28162   3
  13  -3  -4 1.39444 0.96092   3
  12  -3  -4 319.348 13.3522   3
  11  -3  -4 633.338 24.6623   3
  10  -3  -4 0.75761 0.86454   4
  10  -3  -4 -0.6072 0.81581   3
   9  -3  -4 292.166 11.7235   3
   9  -3  -4 270.169 10.9849   4
   8  -3  -4 112.274 5.36586   3
   8  -3  -4 110.594 4.85295   4
   7  -3  -4 42.5276 2.74178   3
   7  -3  -4 39.2650 2.25903   4
   6  -3  -4 438.489 16.5963   4
   6  -3  -4 446.142 17.0244   3
   5  -3  -4 10.5445 1.70721   1
   5  -3  -4 11.9478 1.17173   4
   4  -3  -4 1743.27 64.4777   1
   3  -3  -4 1250.40 47.1275   1
   2  -3  -4 1530.05 57.6773   1
  -2   3   4 1539.22 57.7933   5
   1  -3  -4 205.315 9.85587   1
  -1   3   4 203.645 10.0061   5
   0  -3  -4 31.2112 3.55859   1
   0   3   4 33.4039 3.75095   5
  -1  -3  -4 840.185 33.8796   1
   1   3   4 863.427 34.2000   5
  -2  -3  -4 266.017 12.7434   1
   2   3   4 239.502 12.7278   5
  -3  -3  -4 10.9451 3.18165   1
   3   3   4 12.8031 3.34164   5
  -4  -3  -4 209.359 11.8863   1
  -4  -3  -4 211.425 8.17372   2
   4   3   4 211.089 11.7045   5
   4   3   4 189.421 7.87198   2
  -5  -3  -4 22.9575 5.11382   1
  -5  -3  -4 28.0543 1.85391   2
   5   3   4 26.1676 1.69227   2
   5   3   4 30.2537 4.72296   5
  -6  -3  -4 445.717 17.3787   2
  -6  -3  -4 479.616 23.7059   1
   6   3   4 451.733 21.9565   5
   6   3   4 454.111 17.1576   2
   6   3   4 467.900 17.5938   3
  -7  -3  -4 147.639 13.7525   1
  -7  -3  -4 142.112 6.11341   2
   7   3   4 147.218 6.32077   3
   7   3   4 149.770 10.6396   5
   7   3   4 131.512 5.81875   2
  -8  -3  -4 567.124 21.3770   2
   8   3   4 552.205 21.5304   3
   8   3   4 569.988 26.3977   5
  -9  -3  -4 -0.8436 0.86485   2
   9   3   4 -0.4418 5.74661   5
   9   3   4 0.90426 0.95111   3
 -10  -3  -4 330.158 13.0504   2
  10   3   4 322.079 13.2188   3
 -11  -3  -4 8.08284 1.64517   2
  11   3   4 5.65979 1.33906   3
 -12  -3  -4 1.12123 0.92747   2
  12   3   4 -0.5894 0.97528   3
 -13  -3  -4 1.60073 0.80773   2
  14  -4  -4 61.2519 3.52914   3
  13  -4  -4 -0.3211 0.79422   3
  12  -4  -4 99.5449 5.34739   3
  11  -4  -4 205.488 8.99430   4
  11  -4  -4 245.453 10.0362   3
  10  -4  -4 17.0254 2.19815   3
  10  -4  -4 15.2312 1.72491   4
   9  -4  -4 90.8073 4.74043   3
   9  -4  -4 86.1439 4.14745   4
   8  -4  -4 58.0302 3.53060   3
   8  -4  -4 62.4414 3.11020   4
   7  -4  -4 1085.11 40.3710   3
   7  -4  -4 1084.37 39.8458   4
   6  -4  -4 1287.78 47.5189   3
   5  -4  -4 7.97858 1.10833   4
  -5   4   4 8.10700 3.81161   5
   4  -4  -4 129.195 6.38302   1
   4  -4  -4 122.554 5.15554   4
  -4   4   4 125.342 7.79741   5
   3  -4  -4 124.273 6.53668   1
  -3   4   4 98.1618 6.87103   5
   2  -4  -4 1054.73 40.0247   1
  -2   4   4 1009.75 40.3552   5
   1  -4  -4 2193.07 82.3623   1
  -1   4   4 2211.62 82.8073   5
   0  -4  -4 42.7542 4.28010   1
   0   4   4 38.9725 4.50954   5
  -1  -4  -4 2523.75 94.5579   1
   1   4   4 2514.32 95.0167   5
  -2  -4  -4 179.889 10.2082   1
   2   4   4 179.153 10.4685   5
   2   4   4 162.006 6.68922   2
  -3  -4  -4 647.299 30.0684   1
  -3  -4  -4 763.820 26.6603   2
   3   4   4 724.782 30.8944   5
  -4  -4  -4 96.7018 8.14797   1
  -4  -4  -4 91.5022 4.15786   2
   4   4   4 93.0225 4.04482   2
   4   4   4 100.707 8.19550   5
  -5  -4  -4 232.079 14.6254   1
  -5  -4  -4 240.003 9.57923   2
   5   4   4 251.651 14.6131   5
   5   4   4 245.735 9.42161   2
  -6  -4  -4 999.494 45.4259   1
  -6  -4  -4 1070.26 39.2062   2
   6   4   4 1067.50 39.2884   3
   6   4   4 1089.34 45.1308   5
   6   4   4 1079.31 38.9595   2
  -7  -4  -4 192.747 16.6119   1
  -7  -4  -4 204.978 8.45330   2
   7   4   4 206.116 8.59570   3
   7   4   4 207.414 13.8817   5
  -8  -4  -4 45.5202 2.77873   2
   8   4   4 43.0436 3.06039   3
   8   4   4 41.9130 2.58317   2
   8   4   4 48.1876 8.19806   5
  -9  -4  -4 48.5410 3.02684   2
   9   4   4 45.9516 10.2273   5
   9   4   4 41.8609 3.18628   3
 -10  -4  -4 581.168 20.9040   2
  10   4   4 503.358 20.6667   3
 -11  -4  -4 3.06962 1.05966   2
 -12  -4  -4 9.52256 1.53543   2
  14  -5  -4 0.63417 0.68679   3
  13  -5  -4 169.378 7.62727   3
  12  -5  -4 29.0765 2.59440   3
  12  -5  -4 26.9483 2.14706   4
  11  -5  -4 9.26734 1.61628   4
  11  -5  -4 9.32671 1.85687   3
  10  -5  -4 -0.4351 0.88624   3
  10  -5  -4 0.55604 1.43323   4
   9  -5  -4 282.414 11.4906   3
   9  -5  -4 262.002 10.7749   4
   8  -5  -4 424.530 16.5329   4
   8  -5  -4 442.134 17.1543   3
   7  -5  -4 210.017 10.4599   3
   7  -5  -4 201.077 8.24818   4
   6  -5  -4 893.682 33.2319   3
   6  -5  -4 883.446 32.7934   4
   5  -5  -4 317.034 12.0575   4
   5  -5  -4 310.233 12.3794   3
   4  -5  -4 39.6353 2.14453   4
   4  -5  -4 35.9944 3.34076   1
  -4   5   4 33.9524 6.06291   5
   3  -5  -4 84.6265 3.75470   4
   3  -5  -4 86.0241 5.76666   1
  -3   5   4 89.0035 7.15906   5
   2  -5  -4 3.28600 1.86853   1
   2  -5  -4 2.49445 0.65525   4
  -2   5   4 1.77055 2.64597   5
   1  -5  -4 1885.92 70.7704   1
  -1   5   4 1840.52 71.4286   5
   0  -5  -4 3416.80 131.135   1
   0   5   4 3651.00 132.138   5
  -1  -5  -4 0.96675 2.00970   1
   1   5   4 0.71293 2.61512   5
  -2  -5  -4 453.701 18.4093   2
  -2  -5  -4 499.424 22.4660   1
   2   5   4 490.660 18.1874   2
   2   5   4 521.764 23.3023   5
  -3  -5  -4 270.791 10.5270   2
  -3  -5  -4 275.579 14.9289   1
   3   5   4 275.610 15.3599   5
   3   5   4 264.858 10.3814   2
  -4  -5  -4 2.22943 0.85112   2
  -4  -5  -4 5.04480 3.76763   1
   4   5   4 1.46138 0.69681   2
   4   5   4 1.42940 3.15482   5
  -5  -5  -4 117.803 10.4657   1
  -5  -5  -4 121.521 5.52396   2
   5   5   4 129.495 10.5803   5
   5   5   4 134.575 5.70496   2
  -6  -5  -4 215.387 8.79431   2
  -6  -5  -4 190.102 15.3881   1
   6   5   4 218.859 14.6370   5
   6   5   4 221.028 8.55377   2
  -7  -5  -4 643.759 34.0116   1
  -7  -5  -4 680.772 25.2324   2
   7   5   4 676.228 24.8584   2
   7   5   4 660.008 31.9168   5
  -8  -5  -4 32.2718 2.69444   2
   8   5   4 30.2051 2.17903   2
  -9  -5  -4 -0.4525 0.98690   2
   9   5   4 -3.1503 6.98450   5
 -10  -5  -4 18.9662 2.08286   2
 -11  -5  -4 0.84009 1.17819   2
 -12  -5  -4 69.8049 3.58280   2
 -13  -5  -4 33.3126 2.04171   2
  14  -6  -4 0.85840 0.67518   3
  13  -6  -4 11.1580 1.65105   3
  12  -6  -4 46.1581 2.67656   4
  11  -6  -4 92.5194 5.06170   3
  11  -6  -4 94.4309 4.49548   4
  10  -6  -4 6.13891 1.46323   3
  10  -6  -4 9.43538 1.45232   4
   9  -6  -4 4.10105 1.35181   3
   9  -6  -4 2.64744 1.00917   4
   8  -6  -4 73.1804 4.21988   3
   8  -6  -4 78.0792 3.82012   4
   7  -6  -4 128.913 5.61460   4
   7  -6  -4 127.747 6.03565   3
   6  -6  -4 383.053 14.9535   3
   6  -6  -4 376.128 14.5612   4
   5  -6  -4 1157.63 42.7090   3
   5  -6  -4 1151.38 42.4579   4
   4  -6  -4 404.610 15.3251   1
   4  -6  -4 338.093 13.8659   3
   4  -6  -4 376.198 16.5098   1
   4  -6  -4 349.441 13.6584   4
  -4   6   4 317.558 17.7708   5
   3  -6  -4 27.8303 3.86516   1
   3  -6  -4 30.8877 6.93665   1
   3  -6  -4 28.0838 1.81004   4
  -3   6   4 25.1584 6.15997   5
   2  -6  -4 211.982 8.20390   4
   2  -6  -4 222.263 11.3007   1
  -2   6   4 214.495 12.4260   5
  -2   6   4 192.498 8.01342   2
   1  -6  -4 80.7509 6.38725   1
   1  -6  -4 74.3263 3.41676   4
  -1   6   4 75.6510 7.38615   5
   0  -6  -4 532.741 22.8279   1
   0  -6  -4 496.700 18.6813   4
   0   6   4 480.392 18.6410   2
   0   6   4 506.576 23.6464   5
  -1  -6  -4 14.2182 4.56818   1
  -1  -6  -4 15.2421 1.43307   2
   1   6   4 13.5539 1.32032   2
   1   6   4 14.2131 4.63672   5
  -2  -6  -4 1908.46 75.4653   1
   2   6   4 1958.71 76.5564   5
  -3  -6  -4 404.591 15.3292   2
  -3  -6  -4 390.718 20.5243   1
   3   6   4 394.110 15.1986   2
   3   6   4 423.701 21.4632   5
  -4  -6  -4 3.18262 0.93300   2
  -4  -6  -4 -1.0442 3.97264   1
   4   6   4 0.96387 0.76945   2
   4   6   4 -0.9810 3.35324   5
  -5  -6  -4 80.5991 4.02004   2
  -5  -6  -4 86.0294 10.4004   1
   5   6   4 83.6569 9.78320   5
   5   6   4 83.4264 3.88278   2
  -6  -6  -4 87.2276 4.22208   2
  -6  -6  -4 85.3122 12.7201   1
   6   6   4 73.6382 9.56848   5
   6   6   4 80.9194 3.90958   2
  -7  -6  -4 27.3961 2.33224   2
  -7  -6  -4 30.0606 11.5580   1
   7   6   4 36.7726 9.23324   5
   7   6   4 26.8099 2.04154   2
  -8  -6  -4 45.7958 2.98035   2
   8   6   4 40.9740 2.60177   2
   8   6   4 44.2096 10.4826   5
  -9  -6  -4 142.501 6.38394   2
   9   6   4 117.938 17.3492   5
 -10  -6  -4 155.921 6.91155   2
 -11  -6  -4 11.7081 1.66299   2
 -12  -6  -4 0.24964 0.69439   2
  13  -7  -4 10.2392 1.96761   3
  12  -7  -4 1.29115 0.81152   4
  12  -7  -4 1.10272 0.83063   3
  11  -7  -4 0.09369 0.72735   4
  11  -7  -4 0.96637 0.95702   3
  10  -7  -4 1.26443 0.84405   4
  10  -7  -4 -0.8374 0.77724   3
   9  -7  -4 18.0352 1.74227   4
   9  -7  -4 18.9930 2.21356   3
   8  -7  -4 86.2656 4.16909   4
   8  -7  -4 81.2624 4.56188   3
   7  -7  -4 43.9643 3.02449   3
   7  -7  -4 42.2049 2.64941   4
   6  -7  -4 20.9986 1.79355   4
   6  -7  -4 20.0462 2.17030   3
   5  -7  -4 67.3865 3.69551   3
   5  -7  -4 70.2032 3.44191   4
   4  -7  -4 185.544 9.99833   1
   4  -7  -4 208.967 9.27717   1
   4  -7  -4 182.791 7.63293   4
  -4   7   4 177.434 7.37662   2
   3  -7  -4 348.099 13.0621   4
   3  -7  -4 366.903 16.2065   1
  -3   7   4 323.032 12.8087   2
  -3   7   4 317.189 18.1686   5
   2  -7  -4 81.6557 3.76143   4
   2  -7  -4 79.4724 6.60894   1
  -2   7   4 81.8331 3.63520   2
  -2   7   4 93.9026 9.22528   5
   1  -7  -4 373.515 14.3020   4
   1  -7  -4 378.341 18.2258   1
  -1   7   4 391.594 20.1225   5
  -1   7   4 371.236 14.2223   2
   0  -7  -4 265.626 14.4372   1
   0  -7  -4 261.313 10.0714   4
   0   7   4 258.222 10.0613   2
   0   7   4 255.353 15.6220   5
  -1  -7  -4 379.228 14.7363   2
  -1  -7  -4 397.657 14.6842   4
  -1  -7  -4 381.520 19.6609   1
   1   7   4 393.793 21.1275   5
   1   7   4 391.472 14.7568   2
  -2  -7  -4 177.150 12.2879   1
  -2  -7  -4 178.910 7.25941   2
   2   7   4 171.267 13.1391   5
   2   7   4 179.088 7.21808   2
  -3  -7  -4 1.92742 0.88989   2
  -3  -7  -4 2.25572 3.96319   1
   3   7   4 2.36990 0.83080   2
   3   7   4 2.20573 4.67372   5
  -4  -7  -4 741.692 35.3145   1
  -4  -7  -4 752.068 27.9721   2
   4   7   4 764.590 27.8430   2
   4   7   4 728.077 35.6159   5
  -5  -7  -4 450.393 26.3030   1
  -5  -7  -4 485.215 18.3104   2
   5   7   4 486.194 18.1181   2
   5   7   4 473.997 25.9854   5
  -6  -7  -4 53.0930 13.4849   1
  -6  -7  -4 57.3157 3.34893   2
   6   7   4 58.5620 3.13927   2
  -7  -7  -4 262.648 25.4491   1
  -7  -7  -4 331.023 12.7831   2
   7   7   4 322.424 20.9332   5
   7   7   4 322.067 12.4016   2
  -8  -7  -4 71.6120 3.93400   2
   8   7   4 68.8790 13.9581   5
  -9  -7  -4 5.05389 1.16560   2
 -10  -7  -4 50.0890 3.00746   2
 -11  -7  -4 15.6763 1.63453   2
  13  -8  -4 132.159 6.76233   3
  12  -8  -4 1.97893 1.04229   3
  11  -8  -4 22.1457 1.93712   4
  11  -8  -4 23.0633 2.17925   3
  10  -8  -4 8.23942 1.66369   3
  10  -8  -4 8.43424 1.42691   4
   9  -8  -4 355.328 14.7559   3
   9  -8  -4 376.500 14.3581   4
   8  -8  -4 222.144 9.45614   3
   8  -8  -4 214.550 8.97852   4
   7  -8  -4 182.172 7.92503   3
   7  -8  -4 174.020 8.85893   4
   6  -8  -4 884.646 32.2744   4
   6  -8  -4 847.852 32.4580   3
   5  -8  -4 74.7785 3.73398   4
   4  -8  -4 82.9430 3.94918   4
   4  -8  -4 80.3149 4.89997   1
  -4   8   4 81.9611 3.73960   2
   3  -8  -4 33.3366 2.11665   4
   3  -8  -4 29.3787 5.27983   1
  -3   8   4 29.1847 1.99726   2
  -3   8   4 33.9696 8.71473   5
   2  -8  -4 554.360 20.8834   4
   2  -8  -4 569.775 25.0998   1
  -2   8   4 542.289 28.0650   5
   1  -8  -4 1106.74 46.0556   1
   1  -8  -4 1170.35 41.2088   4
  -1   8   4 1133.44 41.1185   2
  -1   8   4 1062.65 47.9198   5
   0  -8  -4 37.3581 5.98718   1
   0  -8  -4 37.3497 3.02090   4
   0   8   4 36.1362 2.20254   2
   0   8   4 59.5056 10.7918   5
  -1  -8  -4 233.219 8.92709   4
  -1  -8  -4 199.046 9.01832   2
  -1  -8  -4 227.031 14.2673   1
   1   8   4 236.425 9.04960   2
   1   8   4 250.442 16.4725   5
  -2  -8  -4 223.255 14.9531   1
  -2  -8  -4 225.967 9.07477   2
   2   8   4 220.663 16.2225   5
   2   8   4 232.105 9.08973   2
  -3  -8  -4 395.674 27.1693   1
  -3  -8  -4 369.952 14.4539   2
   3   8   4 372.697 14.4181   2
   3   8   4 370.419 22.6171   5
  -4  -8  -4 170.082 7.11883   2
  -4  -8  -4 147.325 14.3609   1
   4   8   4 172.418 7.04921   2
   4   8   4 162.035 14.9894   5
  -5  -8  -4 -5.1219 8.03569   1
   5   8   4 8.30137 6.73171   5
  -6  -8  -4 562.249 20.7199   2
   6   8   4 488.903 28.7353   5
   6   8   4 551.856 20.5023   2
  -7  -8  -4 48.1037 3.04554   2
   7   8   4 47.4098 2.81445   2
   7   8   4 22.4363 11.2134   5
  -8  -8  -4 90.5004 4.50260   2
  -9  -8  -4 52.4469 3.02724   2
 -11  -8  -4 20.2489 1.56725   2
  12  -9  -4 17.9755 1.50555   4
  11  -9  -4 81.7042 3.93269   4
  11  -9  -4 81.8897 4.28191   3
  10  -9  -4 6.95241 1.33136   4
  10  -9  -4 13.0315 1.88348   3
   9  -9  -4 39.9259 3.33246   3
   9  -9  -4 37.7076 2.49039   4
   8  -9  -4 32.8426 2.36650   4
   7  -9  -4 1.20367 0.92148   4
   6  -9  -4 116.282 5.33642   4
   5  -9  -4 186.393 7.81031   4
   4  -9  -4 27.9304 2.07446   4
  -4   9   4 27.3632 1.96682   2
   3  -9  -4 18.7693 1.76822   4
   3  -9  -4 24.1067 6.02353   1
  -3   9   4 18.4406 1.62816   2
   2  -9  -4 163.562 6.69805   4
  -2   9   4 141.390 16.3869   5
  -2   9   4 157.725 6.54012   2
   1  -9  -4 69.4151 3.46065   4
  -1   9   4 70.8569 12.8428   5
  -1   9   4 72.6904 3.49614   2
   0  -9  -4 13.7890 1.52267   4
   0  -9  -4 9.01409 4.56247   1
   0   9   4 20.1373 8.89040   5
   0   9   4 15.5036 1.56144   2
  -1  -9  -4 136.729 12.0397   1
  -1  -9  -4 135.891 5.88026   4
   1   9   4 145.334 6.06410   2
   1   9   4 143.704 14.3421   5
  -2  -9  -4 134.285 6.62092   2
  -2  -9  -4 144.156 12.9477   1
   2   9   4 145.700 14.7166   5
   2   9   4 158.523 6.36653   2
  -3  -9  -4 18.4261 1.88920   2
  -3  -9  -4 20.7430 7.77862   1
   3   9   4 16.2595 7.48869   5
  -4  -9  -4 0.80127 0.88394   2
  -4  -9  -4 -4.4798 7.05870   1
   4   9   4 2.40581 0.99061   2
   4   9   4 8.18885 7.23364   5
  -5  -9  -4 50.0478 3.00928   2
  -5  -9  -4 38.1686 11.1539   1
   5   9   4 53.6121 11.8394   5
   5   9   4 52.7694 2.98586   2
   6   9   4 8.58367 7.64090   5
  -7  -9  -4 0.39000 0.93496   2
   7   9   4 0.00524 0.88479   2
  -8  -9  -4 23.1243 1.96467   2
   8   9   4 21.4954 1.76987   2
  -9  -9  -4 73.6528 3.59661   2
 -10  -9  -4 5.33958 1.10098   2
  11 -10  -4 7.52827 1.46876   4
  10 -10  -4 95.2899 4.39161   4
   9 -10  -4 0.92365 0.65165   4
   8 -10  -4 77.1433 3.87868   4
   7 -10  -4 38.1593 2.51038   4
   6 -10  -4 20.8471 1.94120   4
   5 -10  -4 60.1284 3.26880   4
  -5  10   4 57.6546 3.32563   2
   4 -10  -4 7.90469 1.36902   4
  -4  10   4 7.12431 1.54980   2
   3 -10  -4 29.5213 6.08139   1
   3 -10  -4 28.2255 2.08168   4
   2 -10  -4 44.4778 8.73445   1
   1 -10  -4 71.0993 9.74930   1
  -1  10   4 92.2998 20.7823   5
   0 -10  -4 12.7305 6.14175   1
   0  10   4 2.58349 9.86709   5
   0  10   4 11.4368 1.54332   2
  -1 -10  -4 39.5140 10.0057   1
   1  10   4 35.0136 9.30547   5
   1  10   4 55.3557 3.00847   2
   2  10   4 5.80300 8.64144   5
   2  10   4 6.55032 1.27963   2
  -3 -10  -4 13.3234 8.59022   1
   3  10   4 15.3554 1.75662   2
   3  10   4 11.0069 8.57117   5
  -4 -10  -4 112.745 5.23680   2
   4  10   4 122.750 5.39975   2
   4  10   4 119.785 21.4797   5
   5  10   4 39.5091 2.62329   2
  -6 -10  -4 146.657 6.25188   2
  -7 -10  -4 33.1909 2.20239   2
  -8 -10  -4 9.00185 1.32331   2
  -9 -10  -4 -1.0441 0.64427   2
   9 -11  -4 7.38750 1.21466   4
   8 -11  -4 31.4558 2.15675   4
   7 -11  -4 336.562 13.6719   4
   6 -11  -4 0.22712 0.67794   4
   5 -11  -4 17.3569 1.75848   4
   4 -11  -4 2.97732 0.84283   4
  -4  11   4 2.02233 0.84020   2
   3 -11  -4 205.391 8.54678   4
  -3  11   4 211.709 8.44308   2
   2 -11  -4 78.0407 3.77413   4
  -2  11   4 74.1392 3.71207   2
   1 -11  -4 87.5227 4.16312   4
  -1  11   4 91.2181 4.28088   2
   0 -11  -4 223.219 9.03866   4
   0  11   4 163.043 34.5949   5
   0  11   4 238.856 9.27144   2
   1  11   4 243.708 23.8568   5
   1  11   4 224.672 9.27375   2
   2  11   4 67.4892 3.59025   2
   2  11   4 91.1036 21.8337   5
   3  11   4 45.6139 2.82112   2
   4  11   4 9.70138 1.84872   2
   5  11   4 191.226 7.83991   2
   6  11   4 50.4275 2.75027   2
   9 -12  -4 2.91765 0.75741   4
   8 -12  -4 25.6779 1.81138   4
   7 -12  -4 91.8411 4.27135   4
   6 -12  -4 105.575 4.79079   4
   5 -12  -4 0.74890 0.66739   4
   4 -12  -4 2.25474 0.77511   4
  -4  12   4 1.18703 0.84901   2
  -3  12   4 0.09572 0.73555   2
   2 -12  -4 9.09727 1.83594   4
   1 -12  -4 0.25100 0.67381   4
  -1  12   4 0.13668 0.79341   2
   0  12   4 11.7262 1.72598   2
   2  12   4 0.59606 0.84208   2
   3  12   4 25.7983 2.00658   2
   4  12   4 4.99314 1.00991   2
   5  12   4 15.3844 1.53004   2
   6  12   4 -0.3781 0.57030   2
   7 -13  -4 -0.0397 0.43600   4
   6 -13  -4 6.07043 1.03052   4
   5 -13  -4 2.41766 0.64501   4
   4 -13  -4 20.6882 1.56821   4
  -4  13   4 18.3332 1.67644   2
   3 -13  -4 8.40572 1.13710   4
  -3  13   4 7.10344 1.34023   2
  -2  13   4 13.0661 1.43533   2
  -1  13   4 2.37998 0.79462   2
   0  13   4 24.9684 1.86665   2
   1  13   4 2.54789 0.83943   2
   2  13   4 56.8332 2.96574   2
   3  13   4 -0.9824 0.61522   2
   4  13   4 25.4386 1.72717   2
   4 -14  -4 23.4999 1.55154   4
  -2  14   4 1.12604 0.61714   2
  -1  14   4 114.699 4.77886   2
   1  14   4 5.14729 1.05469   2
   3  15  -5 0.89053 0.55882   2
   1  15  -5 6.37674 1.53958   2
   0  15  -5 22.3294 2.41571   2
  -1  15  -5 9.64439 1.48772   2
   1 -15   5 7.59763 1.05746   4
  -2  15  -5 21.1739 1.55896   2
   2 -15   5 21.3765 1.49242   4
   3 -15   5 30.3164 1.85985   4
   4 -15   5 0.88994 0.52467   4
   5 -15   5 140.679 5.82370   4
   5  14  -5 58.1874 2.81147   2
   4  14  -5 13.8658 1.45867   2
   3  14  -5 142.605 6.00022   2
   2  14  -5 73.9760 3.58232   2
   1  14  -5 194.972 7.93877   2
   0  14  -5 1.77395 0.85703   2
   0 -14   5 1.57915 0.68529   4
  -1  14  -5 118.084 5.05529   2
   1 -14   5 111.146 5.00889   4
  -2  14  -5 -0.6843 0.67659   2
   2 -14   5 -0.7426 0.55359   4
  -3  14  -5 -0.3258 0.72556   2
   3 -14   5 1.08264 0.68988   4
  -4  14  -5 32.1826 2.78698   2
   4 -14   5 24.8683 1.94179   4
   5 -14   5 41.8388 2.50424   4
   6 -14   5 126.658 5.50943   4
   7 -14   5 98.2516 4.50526   4
   8 -14   5 5.95393 0.92751   4
   7  13  -5 -0.1616 0.60251   2
   6  13  -5 20.0254 1.61513   2
   5  13  -5 33.6016 2.18995   2
   4  13  -5 108.363 4.87896   2
   2  13  -5 88.9477 4.27974   2
   1  13  -5 5.68667 1.18000   2
  -1 -13   5 3.70496 1.30304   4
   0  13  -5 5.34915 1.18047   2
   0 -13   5 4.17905 0.95213   4
  -1  13  -5 42.3622 2.57225   2
   1 -13   5 41.9710 2.61849   4
  -2  13  -5 13.5420 1.64342   2
   2 -13   5 15.5572 1.72252   4
  -3  13  -5 0.24308 0.86562   2
   3 -13   5 0.80496 0.73054   4
  -4  13  -5 142.241 6.34495   2
   4 -13   5 170.605 6.90939   4
   5 -13   5 1.15979 1.29787   4
   6 -13   5 28.3534 2.16352   4
   7 -13   5 0.20218 0.68198   4
   8 -13   5 51.9317 2.81526   4
   9 -13   5 215.105 8.52419   4
   8  12  -5 1.06965 0.74843   2
   7  12  -5 30.0752 1.91883   2
  -7 -12   5 20.2957 2.12690   2
   6  12  -5 1.37244 0.85864   2
   5  12  -5 25.5415 2.03337   2
   4  12  -5 0.37779 0.90764   2
   3  12  -5 24.1016 2.09213   2
   3  12  -5 17.9530 8.71711   5
   2  12  -5 29.4943 9.98495   5
   2  12  -5 39.6012 2.58261   2
  -2 -12   5 35.9776 2.29658   4
   1  12  -5 9.96434 9.88952   5
   1  12  -5 2.53049 1.00216   2
  -1 -12   5 2.36634 0.90020   4
  -1 -12   5 -0.7570 7.65245   1
   0  12  -5 0.72372 0.87991   2
   0  12  -5 -8.7933 10.1892   5
   0 -12   5 0.64301 0.77412   4
   0 -12   5 -2.4572 7.09033   1
  -1  12  -5 23.0232 1.97555   2
   1 -12   5 15.0426 7.18307   1
   1 -12   5 25.4922 2.09303   4
  -2  12  -5 88.6973 4.27481   2
   2 -12   5 97.4070 4.59747   4
   2 -12   5 75.5633 10.9698   1
  -3  12  -5 70.8670 4.13966   2
   3 -12   5 70.2725 3.82936   4
  -4  12  -5 171.251 7.30541   2
   4 -12   5 189.684 7.87162   4
   5 -12   5 202.004 8.60295   4
   6 -12   5 0.41596 0.77556   4
   7 -12   5 4.11707 0.99347   4
   8 -12   5 14.6361 1.54765   4
   9 -12   5 14.8133 1.51070   4
  10 -12   5 82.4000 3.75137   4
 -10 -11   5 -0.4234 0.67345   2
  -9 -11   5 66.9654 3.59367   2
   8  11  -5 46.9410 2.57723   2
  -8 -11   5 50.9696 2.83126   2
   7  11  -5 485.401 18.0430   2
  -7 -11   5 465.541 18.1719   2
   6  11  -5 187.325 7.64491   2
  -6 -11   5 178.457 7.70993   2
   5  11  -5 109.903 5.00574   2
  -5 -11   5 104.287 5.01770   2
   4  11  -5 22.4491 1.98416   2
   4  11  -5 25.6870 8.18021   5
  -4 -11   5 16.7248 1.99025   2
  -4 -11   5 18.4201 9.81328   1
   3  11  -5 28.3206 8.92334   5
   3  11  -5 25.1863 2.11173   2
  -3 -11   5 14.6197 8.44377   1
   2  11  -5 258.029 18.9257   5
   2  11  -5 264.986 10.6018   2
  -2 -11   5 227.087 18.3016   1
  -2 -11   5 287.996 11.7449   4
   1  11  -5 161.423 16.3895   5
  -1 -11   5 176.227 7.30427   4
  -1 -11   5 168.633 14.4753   1
   0  11  -5 494.161 18.6038   2
   0  11  -5 478.728 27.2719   5
   0 -11   5 490.423 18.7148   4
   0 -11   5 480.065 25.2136   1
  -1  11  -5 1012.92 36.7215   2
  -1  11  -5 1029.77 45.6561   5
   1 -11   5 1001.99 36.9420   4
   1 -11   5 922.786 42.1850   1
  -2  11  -5 377.587 14.5941   2
   2 -11   5 388.632 14.9636   4
   2 -11   5 367.210 19.1605   1
  -3  11  -5 67.9839 3.62677   2
   3 -11   5 77.4548 5.33513   4
   3 -11   5 80.3403 7.48530   1
  -4  11  -5 14.0806 1.66018   2
   4 -11   5 13.0804 1.86421   4
   5 -11   5 177.008 7.74132   4
   6 -11   5 68.4340 3.79683   4
   7 -11   5 43.0945 2.81167   4
   8 -11   5 98.5887 4.75800   4
   9 -11   5 56.5174 3.11565   4
  10 -11   5 7.76021 1.23376   4
  11 -11   5 34.9554 1.98582   4
 -11 -10   5 0.81473 0.70209   2
 -10 -10   5 32.2390 2.12941   2
  -9 -10   5 27.5945 2.08916   2
   8  10  -5 17.7090 1.67700   2
   7  10  -5 44.7027 2.77957   2
   7  10  -5 52.4981 11.7467   5
  -7 -10   5 52.5789 3.09700   2
   6  10  -5 15.4841 1.77734   2
   6  10  -5 12.3524 7.37545   5
  -6 -10   5 17.9730 17.4158   1
  -6 -10   5 14.7949 1.86342   2
   5  10  -5 22.1107 6.91876   5
   5  10  -5 31.7744 2.34713   2
  -5 -10   5 25.7207 9.43242   1
  -5 -10   5 31.0648 2.40370   2
   4  10  -5 4.67809 6.40068   5
  -4 -10   5 3.20453 1.08205   2
  -4 -10   5 3.86866 6.92238   1
   3  10  -5 -0.6355 5.65159   5
   3  10  -5 2.35434 1.01291   2
  -3 -10   5 -0.5259 5.96521   1
  -3 -10   5 1.56367 1.01363   2
  -3 -10   5 2.52784 0.86829   4
   2  10  -5 281.284 10.6518   2
   2  10  -5 259.070 17.5780   5
  -2 -10   5 252.025 17.5793   1
  -2 -10   5 270.970 10.6040   4
  -2 -10   5 251.784 10.4751   2
   1  10  -5 53.8508 2.97926   2
   1  10  -5 46.9356 9.54664   5
  -1 -10   5 52.7835 3.00943   4
   0  10  -5 33.6732 7.98577   5
   0  10  -5 22.5986 1.88359   2
   0 -10   5 22.5427 1.94317   4
   0 -10   5 28.2272 7.03942   1
  -1  10  -5 1.70784 6.54832   5
  -1  10  -5 -1.5548 0.68044   2
   1 -10   5 -0.4060 3.87123   1
   1 -10   5 0.11859 0.85020   4
  -2  10  -5 15.3099 1.62473   2
   2 -10   5 15.1510 1.84657   4
   2 -10   5 20.9129 4.92613   1
  -3  10  -5 705.300 26.5518   2
   3 -10   5 723.460 26.9424   4
   3 -10   5 708.490 29.3708   1
  -4  10  -5 70.2588 3.49903   2
   4 -10   5 71.2214 3.85746   4
   5 -10   5 140.335 6.40627   4
   6 -10   5 0.79768 0.95702   4
   7 -10   5 2.90811 0.98126   4
   8 -10   5 19.8193 1.92810   4
   9 -10   5 22.1849 3.57462   3
   9 -10   5 35.7028 2.36641   4
  10 -10   5 154.692 7.21386   3
  10 -10   5 160.678 6.68829   4
  11 -10   5 164.126 6.90260   4
 -11  -9   5 193.849 7.91625   2
 -10  -9   5 96.9572 4.62482   2
   9   9  -5 -0.4958 0.90543   2
  -9  -9   5 1.09962 0.90499   2
   8   9  -5 108.849 13.1711   5
   8   9  -5 118.480 5.25880   2
  -8  -9   5 124.757 5.69231   2
   7   9  -5 100.292 11.7223   5
   7   9  -5 107.718 4.98674   2
  -7  -9   5 112.450 5.32374   2
  -7  -9   5 141.444 22.1238   1
   6   9  -5 83.5704 4.27672   2
  -6  -9   5 96.9204 15.8308   1
  -6  -9   5 86.1226 4.54723   2
   5   9  -5 7.42347 5.10643   5
   5   9  -5 10.7121 1.58214   2
  -5  -9   5 9.63761 1.62383   2
  -5  -9   5 3.76040 7.26037   1
   4   9  -5 373.836 21.7481   5
   4   9  -5 380.918 14.9267   2
  -4  -9   5 396.745 23.3282   1
  -4  -9   5 392.915 15.0466   2
   3   9  -5 509.992 25.8088   5
   3   9  -5 506.701 18.9683   2
  -3  -9   5 481.979 26.0930   1
  -3  -9   5 495.016 18.9687   2
   2   9  -5 7.44943 5.17556   5
   2   9  -5 8.27685 1.35365   2
  -2  -9   5 9.24673 4.74042   1
  -2  -9   5 8.01543 1.43409   2
   1   9  -5 191.742 13.7600   5
   1   9  -5 183.094 7.27912   2
  -1  -9   5 161.937 7.34225   2
  -1  -9   5 172.274 12.5680   1
   0   9  -5 3.68648 4.75375   5
   0   9  -5 9.39572 1.29754   2
   0  -9   5 9.17343 3.87474   1
  -1   9  -5 166.667 12.2009   5
  -1   9  -5 161.028 6.84643   2
   1  -9   5 164.124 11.0457   1
  -2   9  -5 59.4027 8.79625   5
  -2   9  -5 56.9208 2.96135   2
   2  -9   5 63.9903 6.53721   1
   2  -9   5 60.6529 3.27603   4
  -3   9  -5 197.311 8.08913   2
  -3   9  -5 205.095 14.4603   5
   3  -9   5 206.189 8.46375   4
   3  -9   5 200.280 10.9020   1
  -4   9  -5 1065.13 40.1364   2
   4  -9   5 1123.43 40.6220   4
   5  -9   5 221.997 9.24720   4
   6  -9   5 66.8764 3.61742   4
   6  -9   5 58.2750 3.66437   3
   7  -9   5 5.28339 1.76305   4
   7  -9   5 2.91868 1.12243   3
   8  -9   5 17.4463 2.15508   3
   8  -9   5 18.3567 1.91446   4
   9  -9   5 89.5449 4.34860   4
   9  -9   5 85.6298 4.64399   3
  10  -9   5 2.30669 0.98525   4
  10  -9   5 5.65747 1.58110   3
  11  -9   5 167.870 7.44052   3
  11  -9   5 167.785 6.85543   4
  12  -9   5 3.07067 1.10817   3
 -11  -8   5 29.8070 2.28015   2
 -10  -8   5 19.1228 2.08878   2
   9   8  -5 1.65995 7.14813   5
   9   8  -5 0.01311 0.89594   2
  -9  -8   5 3.96734 1.19560   2
   8   8  -5 376.036 14.7324   2
  -8  -8   5 393.707 15.2418   2
   7   8  -5 112.592 5.31547   2
   7   8  -5 112.820 11.3919   5
  -7  -8   5 133.856 18.6837   1
   6   8  -5 5.51282 5.17135   5
   6   8  -5 7.88873 1.43186   2
  -6  -8   5 17.3536 8.75634   1
  -6  -8   5 5.87061 1.21142   2
   5   8  -5 46.7967 2.73739   2
   5   8  -5 52.3342 7.77821   5
  -5  -8   5 48.7119 9.46547   1
  -5  -8   5 47.8602 2.90085   2
   4   8  -5 69.2217 8.56617   5
   4   8  -5 72.4699 3.61084   2
  -4  -8   5 79.1784 10.0210   1
  -4  -8   5 73.9727 3.71596   2
   3   8  -5 184.698 7.08503   2
   3   8  -5 166.890 12.0678   5
  -3  -8   5 162.457 12.7396   1
  -3  -8   5 160.368 7.03961   2
   2   8  -5 22.2815 1.71065   2
   2   8  -5 22.4997 5.82028   5
  -2  -8   5 20.9567 1.66534   2
  -2  -8   5 20.6514 5.50765   1
   1   8  -5 485.170 18.5076   2
   1   8  -5 494.971 23.4889   5
  -1  -8   5 496.426 23.8349   1
   0   8  -5 512.673 19.4855   2
   0   8  -5 533.822 24.3354   5
   0  -8   5 515.561 24.2151   1
  -1   8  -5 220.018 12.9082   5
  -1   8  -5 211.480 8.47073   2
   1  -8   5 211.703 12.3435   1
  -2   8  -5 107.193 8.86911   5
  -2   8  -5 94.7389 4.32273   2
   2  -8   5 103.263 7.62716   1
  -3   8  -5 3.67271 0.84530   2
  -3   8  -5 2.89040 5.19747   5
   3  -8   5 3.34319 2.39400   1
  -4   8  -5 8.84927 1.24762   2
   4  -8   5 10.9041 2.77715   1
   4  -8   5 6.34581 3.18080   1
   4  -8   5 7.50692 1.33704   4
   5  -8   5 622.174 24.1471   3
   5  -8   5 661.344 24.2711   4
   6  -8   5 39.0508 2.63176   4
   6  -8   5 40.8905 2.75427   3
   7  -8   5 1039.05 38.5268   4
   7  -8   5 1034.61 38.6870   3
   8  -8   5 81.8724 4.03866   4
   8  -8   5 72.6054 4.23670   3
   9  -8   5 23.5741 2.01806   4
   9  -8   5 24.9538 2.48247   3
  10  -8   5 15.6127 1.64089   4
  10  -8   5 16.0775 2.12851   3
  11  -8   5 2.18790 0.86288   4
  11  -8   5 4.56503 1.57687   3
  12  -8   5 157.808 7.07356   3
  13  -8   5 2.28863 0.97397   3
 -13  -7   5 2.70092 0.73199   2
 -12  -7   5 163.865 6.97187   2
 -11  -7   5 41.7172 2.80594   2
 -10  -7   5 0.99806 0.92918   2
   9   7  -5 104.669 11.8384   5
  -9  -7   5 127.023 5.80576   2
   8   7  -5 340.899 12.9358   2
   8   7  -5 310.645 19.0187   5
  -8  -7   5 344.918 14.6079   2
   7   7  -5 22.5590 1.88621   2
   7   7  -5 28.3499 6.37265   5
  -7  -7   5 26.5107 2.14737   2
  -7  -7   5 22.9198 9.75339   1
   6   7  -5 120.789 10.2350   5
   6   7  -5 121.211 5.22869   2
  -6  -7   5 116.793 5.44409   2
  -6  -7   5 117.977 13.5602   1
   5   7  -5 184.169 12.7663   5
   5   7  -5 188.477 7.70087   2
  -5  -7   5 181.519 14.0280   1
  -5  -7   5 195.249 7.89517   2
   4   7  -5 10.3449 1.21132   2
  -4  -7   5 8.47253 1.36575   2
  -4  -7   5 5.82775 4.50084   1
   3   7  -5 84.0873 3.89415   2
   3   7  -5 92.1941 7.96379   5
  -3  -7   5 80.4807 3.90988   2
  -3  -7   5 100.287 13.8076   1
   2   7  -5 93.7055 4.16423   2
   2   7  -5 95.7468 7.94609   5
  -2  -7   5 90.0918 8.50212   1
  -2  -7   5 94.2995 4.23928   2
   1   7  -5 390.541 18.8479   5
   1   7  -5 388.741 14.7750   2
  -1  -7   5 399.425 19.3636   1
  -1  -7   5 385.022 14.7559   2
   0   7  -5 29.1373 4.93459   5
   0   7  -5 24.9720 1.83865   2
   0  -7   5 27.2681 4.54159   1
  -1   7  -5 166.401 9.93208   5
  -1   7  -5 158.098 6.51837   2
   1  -7   5 164.252 9.78149   1
  -2   7  -5 992.127 37.1677   2
  -2   7  -5 1030.35 40.7072   5
   2  -7   5 1015.29 42.0065   1
   2  -7   5 1061.15 40.5331   1
   2  -7   5 979.734 37.8767   5
  -3   7  -5 1.87823 3.57388   5
   3  -7   5 0.67203 1.84802   1
   3  -7   5 -1.6273 4.54590   1
  -4   7  -5 1431.69 55.2902   5
   4  -7   5 1466.20 55.2915   1
   4  -7   5 1426.65 53.4918   1
   4  -7   5 1395.87 52.3772   3
   5  -7   5 93.3286 4.50032   3
   5  -7   5 97.9709 4.52146   4
   6  -7   5 252.384 10.4656   3
   6  -7   5 264.144 10.3950   4
   7  -7   5 85.3939 4.13546   4
   7  -7   5 79.7047 4.28689   3
   8  -7   5 27.2338 2.52124   3
   8  -7   5 34.1351 2.29125   4
   9  -7   5 0.70238 1.32572   3
   9  -7   5 1.34130 1.33491   4
  10  -7   5 194.644 8.27997   4
  10  -7   5 215.739 9.13379   3
  11  -7   5 -0.1421 1.04287   3
  12  -7   5 22.9550 2.33063   3
  13  -7   5 3.26237 1.06581   3
  14  -7   5 15.2882 1.59074   3
 -13  -6   5 18.3714 1.71779   2
 -12  -6   5 176.442 7.53748   2
 -11  -6   5 218.930 9.21774   2
 -10  -6   5 1.91190 1.08360   2
   9   6  -5 255.341 15.9767   5
  -9  -6   5 281.140 11.1906   2
   8   6  -5 59.9924 3.14601   2
   8   6  -5 57.7532 8.19612   5
  -8  -6   5 37.3688 15.9659   1
  -8  -6   5 67.1313 3.61102   2
   7   6  -5 3.24840 0.96346   2
   7   6  -5 2.17455 3.64810   5
  -7  -6   5 9.88291 7.73736   1
  -7  -6   5 4.50952 1.15426   2
   6   6  -5 2.77440 3.20479   5
  -6  -6   5 2.24350 5.79037   1
  -6  -6   5 0.82017 0.82541   2
   5   6  -5 211.491 12.6617   5
   5   6  -5 205.808 8.18852   2
  -5  -6   5 197.417 8.35447   2
  -5  -6   5 213.155 14.3107   1
   4   6  -5 4277.37 160.999   5
  -4  -6   5 4366.11 162.692   1
   3   6  -5 526.272 23.1110   5
   3   6  -5 503.813 18.9039   2
  -3  -6   5 513.397 23.9258   1
  -3  -6   5 484.461 18.9397   2
   2   6  -5 2151.10 82.0149   5
   1   6  -5 4808.09 179.481   5
   1   6  -5 4932.75 180.681   1
   0   6  -5 192.408 11.5705   1
  -1   6  -5 2761.25 104.086   5
  -1   6  -5 2822.51 105.157   1
  -2   6  -5 41.8665 4.71310   5
  -2   6  -5 33.3142 6.49102   1
   2  -6   5 31.7007 6.81466   1
  -3   6  -5 2242.19 91.6711   1
  -3   6  -5 2251.37 86.4057   5
   3  -6   5 2438.44 87.8019   1
  -4   6  -5 2715.10 99.9447   5
   4  -6   5 2664.74 99.1284   1
   5  -6   5 48.5660 2.77501   3
   6  -6   5 118.731 5.18490   4
   6  -6   5 114.703 5.31753   3
   7  -6   5 14.8311 1.60970   4
   7  -6   5 9.64359 1.59966   3
   8  -6   5 126.262 5.59414   4
   8  -6   5 128.735 6.03735   3
   9  -6   5 231.990 9.99035   3
   9  -6   5 233.872 9.36506   4
  10  -6   5 4.12976 1.34714   3
  10  -6   5 7.10019 1.40645   4
  11  -6   5 279.546 11.8200   3
  12  -6   5 0.98639 1.02550   3
  13  -6   5 45.9631 3.07036   3
  14  -6   5 14.5619 1.61065   3
 -14  -5   5 29.2638 1.89920   2
 -13  -5   5 41.2302 2.57079   2
 -12  -5   5 24.5385 2.24562   2
 -11  -5   5 16.3758 1.95690   2
  10   5  -5 59.0874 3.54039   3
 -10  -5   5 65.2536 3.68859   2
   9   5  -5 393.868 15.7971   3
   9   5  -5 380.908 19.7849   5
  -9  -5   5 437.840 16.0262   2
   8   5  -5 915.311 39.3922   5
  -8  -5   5 967.792 35.2046   2
   7   5  -5 52.8306 2.77811   2
   7   5  -5 51.1649 2.99247   3
   7   5  -5 60.6843 6.69214   5
  -7  -5   5 55.1119 3.10019   2
  -7  -5   5 60.5710 11.5690   1
   6   5  -5 163.606 10.5853   5
   6   5  -5 162.921 6.70256   2
  -6  -5   5 161.298 6.95004   2
  -6  -5   5 191.231 13.8987   1
   5   5  -5 119.928 8.14145   5
   5   5  -5 98.8473 4.41866   2
  -5  -5   5 103.774 9.20365   1
  -5  -5   5 100.686 4.58110   2
   4   5  -5 931.810 35.6162   2
   4   5  -5 987.109 39.5615   5
  -4  -5   5 946.147 35.7373   2
  -4  -5   5 1033.15 41.2164   1
   3   5  -5 2112.72 80.3761   1
   3   5  -5 2047.81 79.0134   5
   2   5  -5 1033.08 41.6496   5
   2   5  -5 1075.10 42.8158   1
   1   5  -5 2293.29 86.9441   1
   1   5  -5 2295.04 86.1441   5
   0   5  -5 228.685 11.7733   1
   0   5  -5 212.694 10.9364   5
  -1   5  -5 349.157 15.1474   5
  -1   5  -5 327.854 15.7471   1
  -2   5  -5 740.993 29.1546   5
  -2   5  -5 720.204 29.7089   1
   2  -5   5 729.628 29.7281   1
  -3   5  -5 98.9194 7.78922   1
  -3   5  -5 100.287 6.46607   5
   3  -5   5 98.8638 6.90633   1
  -4   5  -5 25.3371 4.32056   5
   4  -5   5 24.5234 3.93736   1
  -5   5  -5 283.727 14.2965   5
   5  -5   5 282.183 11.2032   3
   5  -5   5 287.708 12.5565   1
   6  -5   5 829.415 31.5279   4
   6  -5   5 876.419 31.8146   3
   7  -5   5 915.623 33.8338   4
   8  -5   5 5.69862 1.23330   3
   8  -5   5 9.26663 1.83569   4
   9  -5   5 -0.2272 1.00483   3
   9  -5   5 -1.2463 0.73176   4
  10  -5   5 225.067 9.80561   3
  11  -5   5 133.564 6.56743   3
  12  -5   5 3.58268 1.44094   3
  13  -5   5 321.401 13.0847   3
  14  -5   5 37.2702 2.60631   3
 -14  -4   5 22.2873 1.69624   2
 -13  -4   5 267.833 10.7415   2
  12   4  -5 101.643 4.94246   3
 -12  -4   5 109.249 5.07274   2
  11   4  -5 1.51030 0.87841   3
 -11  -4   5 2.05785 1.01167   2
  10   4  -5 416.034 17.3930   3
 -10  -4   5 417.689 16.3480   2
   9   4  -5 164.403 10.7439   5
   9   4  -5 156.432 7.07596   3
  -9  -4   5 159.346 6.99317   2
   8   4  -5 520.883 23.4620   5
  -8  -4   5 531.832 20.1067   2
   7   4  -5 1289.85 49.3525   2
   7   4  -5 1411.51 53.7157   5
   7   4  -5 1363.05 49.8639   3
  -7  -4   5 1339.04 49.9654   2
  -7  -4   5 1381.07 57.4326   1
   6   4  -5 1021.37 39.2778   2
   6   4  -5 1140.62 43.3567   5
   6   4  -5 1057.51 39.6376   3
  -6  -4   5 1081.59 45.6665   1
  -6  -4   5 1082.41 39.5947   2
   5   4  -5 1790.08 68.1497   5
  -5  -4   5 1763.25 69.8573   1
   4   4  -5 47.7602 4.78136   5
   4   4  -5 57.5600 6.03985   1
  -4  -4   5 50.1771 2.57902   2
   3   4  -5 1021.05 39.7376   5
   3   4  -5 991.465 40.6589   1
   2   4  -5 1280.62 49.2479   5
   1   4  -5 635.841 26.0116   5
   1   4  -5 652.856 26.8418   1
   0   4  -5 246.082 11.5610   5
   0   4  -5 255.562 12.2823   1
  -1   4  -5 248.062 11.6179   5
  -1   4  -5 263.858 12.3194   1
   1  -4   5 258.991 12.6455   1
  -2   4  -5 168.753 9.05951   1
  -2   4  -5 170.000 8.43436   5
   2  -4   5 171.014 9.14638   1
  -3   4  -5 649.306 25.2498   1
  -3   4  -5 612.378 24.3136   5
   3  -4   5 623.088 22.8764   5
   3  -4   5 559.974 22.8722   5
  -4   4  -5 629.513 26.4282   1
  -4   4  -5 616.310 24.8467   5
  -5   4  -5 58.9478 5.71312   5
   5  -4   5 58.3953 3.17676   3
   5  -4   5 47.4009 4.51836   1
  -6   4  -5 495.990 21.6485   5
   6  -4   5 495.071 18.7377   4
   6  -4   5 506.923 19.0454   3
   7  -4   5 14.6194 1.63766   3
   7  -4   5 13.4583 1.40611   4
   8  -4   5 131.055 5.67462   4
   8  -4   5 140.869 6.26775   3
   9  -4   5 301.296 12.3958   3
  11  -4   5 11.6453 2.12926   3
  12  -4   5 45.8760 3.35292   3
  13  -4   5 0.33259 0.86615   3
  14  -4   5 61.6728 3.46834   3
 -14  -3   5 6.03974 1.23324   2
  13   3  -5 72.8954 3.78145   3
 -13  -3   5 72.6750 3.73555   2
  12   3  -5 51.6318 3.21209   3
 -12  -3   5 54.9820 3.17941   2
  11   3  -5 69.1084 4.04275   3
 -11  -3   5 77.1441 3.99428   2
  10   3  -5 1501.73 56.1925   3
 -10  -3   5 1539.39 56.0023   2
   9   3  -5 70.7587 3.84281   3
  -9  -3   5 70.1089 3.74061   2
   8   3  -5 232.798 10.0590   3
   8   3  -5 255.014 12.6143   5
  -8  -3   5 248.151 9.86898   2
   7   3  -5 3.70714 2.47861   5
   7   3  -5 2.88854 0.91779   3
  -7  -3   5 3.22998 0.92889   2
   6   3  -5 1316.67 48.9716   5
   6   3  -5 1179.36 45.9868   3
  -6  -3   5 1306.92 51.9535   1
  -6  -3   5 1218.98 45.8821   2
   5   3  -5 600.739 24.1751   5
   5   3  -5 573.555 25.3574   1
  -5  -3   5 546.453 21.2986   2
   4   3  -5 24.1393 4.07639   1
   4   3  -5 24.0554 3.34908   5
   3   3  -5 1798.10 70.1928   5
   3   3  -5 1884.47 70.2829   1
   2   3  -5 1202.08 45.3421   5
   2   3  -5 1168.59 46.0752   1
   1   3  -5 143.252 7.72190   5
   1   3  -5 170.038 8.57643   1
   0   3  -5 77.2060 4.77831   5
   0   3  -5 70.8152 5.05937   1
  -1   3  -5 474.903 19.1461   5
  -1   3  -5 475.814 19.7905   1
   1  -3   5 471.306 20.7316   1
  -2   3  -5 2741.62 102.563   1
  -2   3  -5 2800.92 101.861   5
  -3   3  -5 1565.15 59.4712   5
  -3   3  -5 1593.34 60.2799   1
   3  -3   5 1653.26 58.9706   5
   3  -3   5 1561.02 60.0019   1
  -4   3  -5 216.608 10.1835   5
  -4   3  -5 215.919 11.3465   1
   4  -3   5 206.292 10.5709   1
  -5   3  -5 3686.34 141.049   1
  -5   3  -5 3714.83 136.058   5
   6  -3   5 1809.06 68.0602   1
   7  -3   5 693.069 26.1283   3
  -8   3  -5 199.335 8.01833   2
   8  -3   5 197.266 8.46861   3
  -9   3  -5 241.961 10.0173   2
   9  -3   5 255.249 10.5048   3
 -10   3  -5 258.175 11.6402   2
  10  -3   5 288.749 11.6387   3
  11  -3   5 2.27866 1.21900   3
  12  -3   5 162.473 7.58612   3
  13  -3   5 54.0474 3.46506   3
  14  -3   5 48.3516 2.97070   3
  14   2  -5 8.08244 1.49431   3
 -14  -2   5 4.37571 0.97556   2
  13   2  -5 6.42460 1.43675   3
 -13  -2   5 8.46587 1.45958   2
  12   2  -5 0.23558 0.81918   3
 -12  -2   5 0.27587 0.82780   2
  11   2  -5 205.259 9.03151   3
 -11  -2   5 207.641 8.67958   2
  10   2  -5 89.8986 4.76785   3
 -10  -2   5 90.6998 4.49114   2
   9   2  -5 313.252 12.8425   3
  -9  -2   5 322.854 12.5554   2
   8   2  -5 453.223 18.2394   5
   8   2  -5 427.609 16.9454   3
  -8  -2   5 428.965 16.6589   2
   7   2  -5 2.11085 0.83486   3
   7   2  -5 0.92319 2.05859   5
  -7  -2   5 0.68364 0.72264   2
  -7  -2   5 2.21727 6.63358   1
   6   2  -5 119.114 6.93498   5
  -6  -2   5 111.500 4.87216   2
   5   2  -5 149.580 8.04644   5
   5   2  -5 154.013 9.11262   1
   4   2  -5 106.773 7.03971   1
   3   2  -5 6.16152 1.96329   1
   3   2  -5 11.6100 2.38113   5
   2   2  -5 14.8808 2.25846   5
   2   2  -5 15.7629 2.66062   1
   1   2  -5 574.316 23.7027   1
   1   2  -5 598.095 23.1669   5
   0   2  -5 12.8175 2.33422   1
   0   2  -5 13.3576 2.08998   5
  -1   2  -5 1.00017 1.53962   1
  -1   2  -5 1.44521 1.21791   5
  -2   2  -5 109.623 6.48359   1
  -2   2  -5 109.159 5.82997   5
   2  -2   5 117.480 5.90244   5
   2  -2   5 98.8053 6.56521   1
  -3   2  -5 288.050 13.3998   1
  -3   2  -5 294.923 12.6353   5
   3  -2   5 296.294 12.3905   5
   3  -2   5 270.133 16.4005   1
  -4   2  -5 845.830 33.8607   1
  -4   2  -5 840.371 32.9973   5
   4  -2   5 820.675 33.6380   1
   4  -2   5 867.871 32.2000   5
  -5   2  -5 2547.27 95.6010   1
  -5   2  -5 2566.53 94.5989   5
   5  -2   5 2469.86 92.6396   5
   5  -2   5 2582.47 92.5628   5
   6  -2   5 799.976 28.7701   3
   6  -2   5 737.387 31.9750   1
  -7   2  -5 183.110 7.45058   2
   7  -2   5 184.304 7.78863   3
  -8   2  -5 -0.2322 0.83825   2
   8  -2   5 -0.5705 0.86151   3
  -9   2  -5 21.5863 2.02409   2
   9  -2   5 22.9184 2.26748   3
 -10   2  -5 119.211 5.29295   2
  10  -2   5 112.073 5.73762   3
 -11   2  -5 71.4113 3.65141   2
  11  -2   5 63.3415 4.08162   3
 -12   2  -5 73.3220 4.28738   2
  12  -2   5 71.8132 4.28096   3
  13  -2   5 546.287 21.2065   3
  14  -2   5 11.0531 1.62652   3
  15   1  -5 3.45625 0.83287   3
  14   1  -5 66.0667 3.54528   3
 -14  -1   5 62.7395 3.26905   2
  13   1  -5 246.136 10.9913   3
 -13  -1   5 256.247 10.0938   2
  12   1  -5 0.19851 0.81265   3
 -12  -1   5 1.56718 0.91323   2
  11   1  -5 96.5066 5.05598   3
 -11  -1   5 91.0781 4.61235   2
  10   1  -5 259.592 10.9051   3
 -10  -1   5 257.664 10.4148   2
   9   1  -5 71.3912 3.98884   3
  -9  -1   5 72.3387 3.61340   2
   8   1  -5 105.651 5.06613   3
  -8  -1   5 103.720 4.70852   2
   7   1  -5 212.303 9.37706   5
   7   1  -5 202.652 8.27662   3
  -7  -1   5 173.787 8.72602   2
   6   1  -5 997.613 38.1598   5
   5   1  -5 156.681 9.25420   1
   5   1  -5 184.374 8.82720   5
   4   1  -5 902.206 35.4616   5
   4   1  -5 951.146 36.6773   1
   3   1  -5 44.9060 3.92300   1
   3   1  -5 34.7153 3.11662   5
   2   1  -5 437.130 17.6626   5
   2   1  -5 439.509 18.3502   1
   1   1  -5 3.92048 1.45693   1
   1   1  -5 5.45795 1.49430   5
   0   1  -5 4444.89 159.965   1
   0   1  -5 4304.87 159.259   5
  -1   1  -5 96.7684 5.27182   5
  -1   1  -5 95.0260 5.81690   1
  -2   1  -5 147.470 7.46581   5
  -2   1  -5 145.167 7.87104   1
   2  -1   5 152.640 7.53293   5
  -3   1  -5 575.243 23.8107   1
  -3   1  -5 580.812 23.1736   5
   3  -1   5 569.041 23.0747   5
  -4   1  -5 640.847 26.8457   1
  -4   1  -5 662.678 26.2290   5
   4  -1   5 681.558 25.8905   5
   4  -1   5 601.455 27.2116   1
  -5   1  -5 1263.74 49.6383   1
   5  -1   5 1185.41 49.9552   1
   5  -1   5 1316.95 47.8034   5
  -6   1  -5 748.796 32.7319   1
   6  -1   5 728.623 34.1320   1
   6  -1   5 738.824 28.2268   3
   6  -1   5 808.338 30.3363   5
  -7   1  -5 52.2702 2.73964   2
   7  -1   5 51.9115 3.04505   3
  -8   1  -5 572.650 21.6633   2
   8  -1   5 582.703 22.1335   3
  -9   1  -5 108.920 4.91200   2
   9  -1   5 105.123 5.31543   3
 -10   1  -5 127.716 5.62888   2
  10  -1   5 119.129 6.05618   3
 -11   1  -5 84.4234 4.13276   2
  11  -1   5 74.4355 4.45773   3
 -12   1  -5 208.863 8.43258   2
  12  -1   5 197.919 8.96831   3
 -13   1  -5 82.4111 4.05264   2
  13  -1   5 90.0130 4.59834   3
  14  -1   5 76.6012 4.23540   3
  15   0  -5 0.63295 0.58856   3
  14   0  -5 -0.0755 0.67436   3
  13   0  -5 148.775 6.92272   3
 -13   0   5 124.202 5.78653   2
  12   0  -5 80.3772 4.56154   3
 -12   0   5 80.8050 4.02140   2
  11   0  -5 174.349 8.02631   3
  10   0  -5 1568.05 56.7383   3
 -10   0   5 1490.49 56.0567   2
   9   0  -5 246.220 10.2643   3
  -9   0   5 239.998 9.74008   2
   8   0  -5 440.045 17.4421   4
   8   0  -5 505.216 19.8382   3
  -8   0   5 443.686 17.3934   2
   7   0  -5 67.3867 3.28366   4
   7   0  -5 71.1860 3.64316   3
  -7   0   5 68.9073 3.31926   2
   6   0  -5 122.195 5.54048   5
   6   0  -5 124.443 7.62853   1
   5   0  -5 285.915 11.7059   5
   5   0  -5 262.950 12.8168   1
   4   0  -5 395.855 15.7581   5
   4   0  -5 371.913 16.5249   1
   3   0  -5 2703.83 98.0479   5
   3   0  -5 2637.71 98.7061   1
   2   0  -5 384.393 16.3459   1
   2   0  -5 390.562 15.8434   5
   1   0  -5 231.523 10.2133   5
   1   0  -5 233.150 10.6786   1
   0   0  -5 4.00979 1.54766   5
   0   0  -5 4.16919 1.74895   1
  -1   0  -5 2064.02 75.4368   5
  -1   0  -5 2020.96 75.9432   1
   1   0   5 2015.24 75.5354   5
  -2   0  -5 1494.89 58.1934   1
  -2   0  -5 1521.83 57.7179   5
   2   0   5 1592.62 58.0199   5
  -3   0  -5 3097.89 113.627   1
   3   0   5 3023.12 113.061   5
  -4   0  -5 5599.77 207.652   1
   4   0   5 5722.75 206.973   5
  -5   0  -5 1322.20 51.8429   1
   5   0   5 1347.07 50.6660   5
   5   0   5 1269.98 48.0781   3
  -6   0  -5 27.5907 7.25138   1
   6   0   5 25.7850 2.03177   3
   6   0   5 24.7206 3.93819   5
  -7   0  -5 97.6479 4.45407   2
   7   0   5 99.5721 4.75529   3
   7   0   5 102.564 6.82284   5
   8   0   5 611.917 23.3566   3
  -9   0  -5 538.418 20.4145   2
   9   0   5 537.930 20.8880   3
 -10   0  -5 -0.4717 0.84859   2
  10   0   5 1.03679 1.39442   3
 -11   0  -5 400.620 15.4094   2
  11   0   5 390.644 15.9286   3
 -12   0  -5 18.5015 1.89580   2
  12   0   5 15.4325 2.10572   3
 -13   0  -5 31.4634 2.23177   2
  13   0   5 32.3207 2.58902   3
  14   0   5 38.4106 2.48283   3
  15  -1  -5 51.7688 2.88597   3
  14  -1  -5 95.1469 4.80113   3
  13  -1  -5 1.88960 0.88730   3
  12  -1  -5 29.8015 2.70765   3
  11  -1  -5 7.56765 1.68121   3
 -11   1   5 6.11949 1.49193   2
  10  -1  -5 1219.64 44.5382   3
 -10   1   5 1158.86 43.7363   2
   9  -1  -5 495.379 18.3815   3
   9  -1  -5 440.689 17.5435   4
  -9   1   5 460.871 17.6541   2
   8  -1  -5 0.48275 0.75782   4
   8  -1  -5 0.73573 0.85582   3
  -8   1   5 1.01064 1.35678   2
   7  -1  -5 87.3146 4.35040   3
   6  -1  -5 494.809 19.5029   1
   6  -1  -5 428.542 17.2104   4
   5  -1  -5 1125.62 43.2339   1
   4  -1  -5 1294.47 47.4295   5
   4  -1  -5 1263.82 48.5995   1
   3  -1  -5 1.91519 1.16448   5
   3  -1  -5 2.14766 1.53948   1
   2  -1  -5 1001.75 41.1997   1
   2  -1  -5 1117.02 40.2353   5
   1  -1  -5 470.093 19.8764   1
   1  -1  -5 494.641 19.5046   5
   0  -1  -5 2166.60 79.4670   1
   0  -1  -5 2135.54 78.9599   5
   0   1   5 2086.43 79.1106   5
  -1  -1  -5 6463.81 227.458   1
   1   1   5 5999.78 226.984   5
  -2  -1  -5 371.356 16.7121   1
   2   1   5 383.438 16.6231   5
  -3  -1  -5 2492.16 93.5875   1
   3   1   5 2502.97 94.7126   5
  -4  -1  -5 49.5064 5.16993   1
   4   1   5 50.7698 5.01441   5
  -5  -1  -5 606.572 26.7649   1
  -5  -1  -5 573.915 22.5464   2
   5   1   5 643.319 26.1781   5
   5   1   5 614.926 22.8347   3
  -6  -1  -5 22.1751 1.65119   2
  -6  -1  -5 16.7331 5.19642   1
   6   1   5 19.3233 1.87108   3
   6   1   5 17.2154 4.38722   5
  -7  -1  -5 141.574 14.1617   1
  -7  -1  -5 149.727 6.25713   2
   7   1   5 148.079 6.56558   3
   7   1   5 150.322 9.50651   5
  -8  -1  -5 2.31488 0.91060   2
   8   1   5 0.31514 3.86020   5
   8   1   5 0.95245 0.93569   3
  -9  -1  -5 8.37697 1.36486   2
   9   1   5 8.44111 1.59701   3
  10   1   5 202.837 8.94650   3
 -11  -1  -5 1.76876 1.02124   2
  11   1   5 1.58170 1.10254   3
 -12  -1  -5 44.4776 3.63294   2
  12   1   5 59.4725 4.53205   3
 -13  -1  -5 15.9219 1.64173   2
  13   1   5 15.2572 1.85600   3
 -14  -1  -5 23.1972 1.94611   2
  14   1   5 26.7095 2.29572   3
  15  -2  -5 10.8962 1.36808   3
  14  -2  -5 228.182 9.65019   3
  13  -2  -5 0.65539 1.00311   3
  12  -2  -5 184.192 8.45228   3
  11  -2  -5 31.8974 2.82120   3
  10  -2  -5 212.419 9.01302   3
  10  -2  -5 190.889 8.14449   4
   9  -2  -5 60.0964 3.21865   4
   9  -2  -5 63.6936 3.76431   3
   8  -2  -5 106.355 4.84117   4
   8  -2  -5 115.261 5.42665   3
   7  -2  -5 523.854 19.6327   3
   7  -2  -5 495.128 19.0605   4
   6  -2  -5 432.596 17.6171   1
   5  -2  -5 18.2517 1.43559   4
   5  -2  -5 11.7619 2.53721   1
   4  -2  -5 147.019 7.60936   1
   3  -2  -5 4142.56 151.614   1
   2  -2  -5 2981.63 110.027   1
   1  -2  -5 484.110 19.7421   1
  -1   2   5 451.328 19.3856   5
  -1  -2  -5 72.8997 5.33317   1
   1   2   5 63.7256 5.20946   5
  -2  -2  -5 99.8086 6.73609   1
  -3  -2  -5 26.8751 4.30345   1
   3   2   5 19.3900 3.69720   5
  -4  -2  -5 190.777 7.97654   2
  -4  -2  -5 214.386 11.7585   1
   4   2   5 213.085 11.6007   5
  -5  -2  -5 320.922 12.5515   2
  -5  -2  -5 338.485 17.2740   1
   5   2   5 318.342 12.3865   2
   5   2   5 324.307 12.7652   3
   5   2   5 346.905 16.6810   5
  -6  -2  -5 256.206 10.2570   2
  -6  -2  -5 271.728 16.2909   1
   6   2   5 264.786 10.5192   3
   6   2   5 255.896 14.3814   5
  -7  -2  -5 235.372 17.4311   1
  -7  -2  -5 229.081 9.59108   2
   7   2   5 239.825 9.88230   3
   7   2   5 268.894 15.8289   5
  -8  -2  -5 233.707 9.43741   2
   8   2   5 229.795 9.71590   3
   8   2   5 231.681 13.8215   5
  -9  -2  -5 8.17988 1.58233   2
   9   2   5 -6.5404 10.6081   5
   9   2   5 8.53046 1.60353   3
 -10  -2  -5 47.6812 3.09606   2
  10   2   5 49.8820 3.30023   3
 -11  -2  -5 31.0727 2.42780   2
  11   2   5 27.0906 2.57811   3
 -12  -2  -5 -0.4387 0.81635   2
  12   2   5 -0.4305 0.94930   3
 -13  -2  -5 3.09632 0.89502   2
  13   2   5 6.32592 1.17186   3
  15  -3  -5 19.5711 1.65971   3
  14  -3  -5 3.69686 0.98856   3
  13  -3  -5 40.2074 3.83244   3
  12  -3  -5 174.427 8.09940   3
  11  -3  -5 632.559 23.3283   3
  11  -3  -5 555.047 22.1942   4
  10  -3  -5 52.3005 3.48041   3
  10  -3  -5 48.5279 2.90907   4
   9  -3  -5 46.2979 2.73800   4
   9  -3  -5 47.5026 3.22156   3
   8  -3  -5 7.55331 1.53686   3
   7  -3  -5 157.588 6.53014   4
   7  -3  -5 160.504 7.05391   3
   6  -3  -5 196.573 7.81851   4
   5  -3  -5 2101.21 77.5547   1
   4  -3  -5 2094.20 77.8157   1
   3  -3  -5 22.6655 3.05840   1
   2  -3  -5 444.131 17.6470   1
  -2   3   5 361.762 17.2312   5
   1  -3  -5 444.184 18.5233   1
  -1   3   5 407.827 18.4201   5
   0  -3  -5 3017.19 110.974   1
   0   3   5 2953.31 111.116   5
  -1  -3  -5 3859.64 152.409   1
   1   3   5 4424.84 158.408   5
  -2  -3  -5 150.795 8.98211   1
   2   3   5 137.646 8.92572   5
  -3  -3  -5 5051.91 189.264   1
   3   3   5 5199.74 189.537   5
  -4  -3  -5 644.725 28.3046   1
  -4  -3  -5 624.700 23.6510   2
   4   3   5 668.890 28.3577   5
   4   3   5 618.154 23.5140   2
  -5  -3  -5 65.1620 7.69378   1
  -5  -3  -5 67.7062 3.29729   2
   5   3   5 67.7955 3.16956   2
   5   3   5 69.2063 3.61323   3
   5   3   5 74.3127 7.19676   5
  -6  -3  -5 2.91582 0.94596   2
  -6  -3  -5 4.10907 5.33230   1
   6   3   5 4.24245 1.12801   3
   6   3   5 2.87940 0.79263   2
  -7  -3  -5 4.69712 7.58487   1
  -7  -3  -5 1.98693 0.91917   2
   7   3   5 3.57163 0.92772   2
   7   3   5 1.96358 0.99034   3
   7   3   5 3.29626 3.55446   5
  -8  -3  -5 595.997 22.5989   2
   8   3   5 597.464 27.9697   5
   8   3   5 593.675 22.7642   3
   9   3   5 51.1325 3.48610   3
   9   3   5 65.6003 10.4425   5
 -10  -3  -5 92.4252 4.52729   2
  10   3   5 80.7935 4.64943   3
 -11  -3  -5 73.7566 3.81143   2
  11   3   5 59.1970 4.71795   3
 -12  -3  -5 54.2830 3.03888   2
  12   3   5 46.5990 3.33025   3
 -13  -3  -5 3.56477 0.94934   2
  14  -4  -5 2.76135 0.85286   3
  13  -4  -5 -0.8362 0.72951   3
  12  -4  -5 14.1460 2.04780   3
  11  -4  -5 397.028 16.1129   4
  11  -4  -5 446.465 17.1237   3
  10  -4  -5 204.458 8.63344   4
  10  -4  -5 217.977 11.0303   3
   9  -4  -5 0.47183 0.75260   4
   9  -4  -5 0.64597 0.98166   3
   8  -4  -5 477.624 18.2604   4
   8  -4  -5 485.106 18.8809   3
   7  -4  -5 232.150 10.8971   4
   7  -4  -5 271.303 11.4782   3
   6  -4  -5 568.858 21.5226   4
   6  -4  -5 584.466 22.0030   3
   5  -4  -5 1335.81 49.1223   1
  -5   4   5 1310.21 51.3580   5
   4  -4  -5 1429.86 50.9600   1
  -4   4   5 1248.83 51.6310   5
   3  -4  -5 1733.47 63.4753   1
  -3   4   5 1614.25 63.8080   5
   2  -4  -5 11.2317 2.78749   1
  -2   4   5 11.9783 3.27920   5
   1  -4  -5 1533.81 57.0716   1
  -1   4   5 1422.85 57.1383   5
   0  -4  -5 1971.39 74.9110   1
  -1  -4  -5 192.641 10.8815   1
   1   4   5 185.808 7.53729   2
   1   4   5 214.708 11.6847   5
  -2  -4  -5 1358.78 52.1800   1
   2   4   5 1264.22 52.2680   5
  -3  -4  -5 39.5414 5.27327   1
  -3  -4  -5 36.9919 2.15887   2
   3   4   5 44.1739 5.75965   5
   3   4   5 37.9168 2.10737   2
  -4  -4  -5 72.4109 3.56686   2
  -4  -4  -5 66.5709 7.26215   1
   4   4   5 87.4634 8.06721   5
   4   4   5 77.8600 3.41927   2
  -5  -4  -5 19.1111 1.61508   2
  -5  -4  -5 26.6281 5.94993   1
   5   4   5 23.8614 8.33928   5
   5   4   5 21.1895 1.57763   2
   5   4   5 13.8583 2.03336   3
  -6  -4  -5 45.3003 2.66053   2
   6   4   5 36.8572 6.64061   5
  -7  -4  -5 -3.1427 8.84202   1
  -7  -4  -5 0.73493 0.89422   2
   7   4   5 0.55263 0.78583   2
   7   4   5 1.55561 4.24472   5
   7   4   5 -1.0684 1.24652   3
  -8  -4  -5 68.8718 3.74534   2
   8   4   5 64.4832 3.88748   3
   8   4   5 79.1146 9.81698   5
  -9  -4  -5 367.448 13.7930   2
   9   4   5 328.311 13.6954   3
   9   4   5 334.081 20.1348   5
 -10  -4  -5 0.76067 0.99814   2
 -11  -4  -5 20.5856 2.13017   2
 -12  -4  -5 12.0581 1.62385   2
 -13  -4  -5 75.5721 3.56165   2
  14  -5  -5 5.24770 1.16790   3
  13  -5  -5 71.5062 4.02864   3
  12  -5  -5 0.21827 1.01068   3
  12  -5  -5 0.31445 0.80582   4
  11  -5  -5 23.2763 1.99067   4
  11  -5  -5 23.2534 2.44504   3
  10  -5  -5 7.08503 1.63122   3
  10  -5  -5 5.47994 1.11183   4
   9  -5  -5 1.48648 1.09360   3
   9  -5  -5 1.84897 0.94297   4
   8  -5  -5 123.640 6.05412   3
   8  -5  -5 126.064 5.53714   4
   7  -5  -5 143.880 6.59774   3
   7  -5  -5 142.546 6.09899   4
   6  -5  -5 1920.22 70.4330   3
   5  -5  -5 300.921 11.8202   3
   5  -5  -5 305.878 11.4556   4
  -5   5   5 251.363 21.9950   5
   4  -5  -5 99.2130 4.35438   4
   4  -5  -5 105.116 6.31403   1
  -4   5   5 95.0566 8.51256   5
   3  -5  -5 184.750 7.40977   4
   3  -5  -5 180.668 9.88499   1
  -3   5   5 198.469 11.3318   5
   2  -5  -5 -0.5535 1.80428   1
   2  -5  -5 0.02238 0.55437   4
  -2   5   5 -1.7030 2.85490   5
   1  -5  -5 6.45748 0.99989   4
  -1   5   5 7.49514 3.14084   5
  -1   5   5 6.95558 0.98935   2
   0  -5  -5 1535.04 59.8311   1
   0   5   5 1538.07 60.6675   5
  -1  -5  -5 528.126 23.4861   1
  -1  -5  -5 507.162 19.2537   2
   1   5   5 547.627 24.2836   5
   1   5   5 494.574 19.1626   2
  -2  -5  -5 24.8564 4.55580   1
  -2  -5  -5 29.1278 1.83057   2
   2   5   5 27.6804 1.77865   2
   2   5   5 34.5245 5.77345   5
  -3  -5  -5 345.692 18.2863   1
  -3  -5  -5 352.329 13.5689   2
   3   5   5 355.812 13.4436   2
   3   5   5 364.367 19.1892   5
  -4  -5  -5 358.893 13.8484   2
  -4  -5  -5 352.160 19.3374   1
   4   5   5 380.591 23.5167   5
   4   5   5 356.225 13.6932   2
  -5  -5  -5 551.531 20.6823   2
  -5  -5  -5 514.012 27.0283   1
   5   5   5 547.231 27.1816   5
   5   5   5 563.669 20.4800   2
  -6  -5  -5 130.707 13.3141   1
  -6  -5  -5 133.692 5.95049   2
   6   5   5 127.113 11.5926   5
   6   5   5 136.061 5.68954   2
  -7  -5  -5 352.533 24.7739   1
  -7  -5  -5 383.141 14.8511   2
   7   5   5 380.761 14.4901   2
   7   5   5 386.998 21.8886   5
  -8  -5  -5 3.19424 1.15843   2
   8   5   5 4.11575 1.00054   2
   8   5   5 7.62964 6.47057   5
   9   5   5 4.77008 8.15284   5
 -10  -5  -5 3.32314 1.14720   2
 -11  -5  -5 2.84842 1.05869   2
 -12  -5  -5 6.85751 1.35489   2
  14  -6  -5 2.63270 0.75130   3
  13  -6  -5 0.67410 0.73155   3
  12  -6  -5 13.5148 1.86775   3
  12  -6  -5 14.6841 1.61802   4
  11  -6  -5 14.2015 1.71806   4
  11  -6  -5 12.6878 1.94218   3
  10  -6  -5 19.9566 1.86765   4
  10  -6  -5 14.9580 2.07942   3
   9  -6  -5 15.5275 1.88000   4
   9  -6  -5 14.4298 2.92724   3
   8  -6  -5 27.3955 2.50747   3
   8  -6  -5 26.6140 2.10473   4
   7  -6  -5 229.454 9.85659   3
   7  -6  -5 234.613 9.37910   4
   6  -6  -5 11.6223 1.43706   4
   5  -6  -5 357.475 13.7965   4
   5  -6  -5 360.194 14.1723   3
   4  -6  -5 5.29695 1.07047   4
   4  -6  -5 6.34301 1.35991   3
   4  -6  -5 11.8866 4.99750   1
  -4   6   5 9.49284 5.55065   5
  -4   6   5 6.47226 1.17583   2
   3  -6  -5 886.951 33.9392   1
   3  -6  -5 813.199 30.5097   4
  -3   6   5 778.880 35.1470   5
   2  -6  -5 33.6904 4.70886   1
   2  -6  -5 32.8808 1.98040   4
  -2   6   5 32.2452 1.84506   2
  -2   6   5 35.5312 6.52722   5
   1  -6  -5 20.4953 4.02858   1
   1  -6  -5 14.8665 1.31579   4
  -1   6   5 14.8759 1.29116   2
  -1   6   5 20.0097 4.87851   5
   0  -6  -5 236.871 9.25354   4
   0  -6  -5 244.818 13.3921   1
   0   6   5 247.521 14.5417   5
   0   6   5 232.795 9.23606   2
  -1  -6  -5 67.5013 3.10825   4
  -1  -6  -5 55.4275 6.22716   1
  -1  -6  -5 65.6607 3.21848   2
   1   6   5 75.1557 7.93818   5
   1   6   5 67.2461 3.13397   2
  -2  -6  -5 425.063 16.0627   2
  -2  -6  -5 432.841 21.2553   1
   2   6   5 443.462 22.3628   5
   2   6   5 404.254 15.9568   2
  -3  -6  -5 98.2393 9.32364   1
  -3  -6  -5 101.777 4.58152   2
   3   6   5 95.9354 9.85393   5
   3   6   5 104.300 4.49711   2
  -4  -6  -5 202.898 8.08823   2
  -4  -6  -5 185.975 13.8629   1
   4   6   5 198.328 14.2092   5
   4   6   5 192.761 7.87702   2
  -5  -6  -5 286.628 11.7000   2
  -5  -6  -5 280.226 18.9614   1
   5   6   5 299.693 11.5219   2
   5   6   5 319.587 19.3396   5
  -6  -6  -5 117.140 5.24070   2
  -6  -6  -5 83.8492 14.1734   1
   6   6   5 97.2835 10.9297   5
   6   6   5 113.796 4.97574   2
  -7  -6  -5 7.30845 10.9947   1
   7   6   5 6.40218 5.34835   5
   7   6   5 3.71140 1.32792   2
  -8  -6  -5 41.2887 2.82842   2
   8   6   5 38.5056 2.40726   2
   8   6   5 30.9704 8.39020   5
  -9  -6  -5 182.342 7.87716   2
 -11  -6  -5 3.15255 0.89479   2
 -12  -6  -5 60.7599 3.02646   2
  13  -7  -5 0.72971 0.72472   3
  12  -7  -5 101.216 4.59597   4
  12  -7  -5 105.389 5.13440   3
  11  -7  -5 53.6496 3.73798   3
  10  -7  -5 8.94920 1.46467   4
  10  -7  -5 3.72385 1.10414   3
   9  -7  -5 60.5849 3.32854   4
   9  -7  -5 59.1197 3.77046   3
   8  -7  -5 184.734 8.92978   3
   8  -7  -5 233.180 9.72118   4
   7  -7  -5 73.6188 3.77103   4
   7  -7  -5 75.0806 4.20053   3
   6  -7  -5 133.510 6.20136   3
   6  -7  -5 132.991 5.82489   4
   5  -7  -5 136.401 5.85570   4
   5  -7  -5 134.480 6.14375   3
   4  -7  -5 1948.97 70.5196   1
   4  -7  -5 1875.35 73.3358   1
   4  -7  -5 1881.12 68.7821   3
  -4   7   5 1800.11 68.1328   2
   3  -7  -5 335.705 12.8637   4
   3  -7  -5 338.669 16.3366   1
  -3   7   5 329.195 19.2084   5
  -3   7   5 329.607 12.6825   2
   2  -7  -5 239.493 9.59803   4
   2  -7  -5 246.409 13.3187   1
  -2   7   5 239.070 9.33011   2
  -2   7   5 236.805 15.3362   5
   1  -7  -5 25.9510 1.76421   4
   1  -7  -5 22.6136 4.82333   1
  -1   7   5 25.6931 1.70742   2
  -1   7   5 30.3952 7.01249   5
   0  -7  -5 6.03922 1.11056   4
   0  -7  -5 8.63551 3.32977   1
   0   7   5 10.1598 4.93912   5
  -1  -7  -5 521.646 19.4414   4
  -1  -7  -5 526.836 25.0228   1
  -1  -7  -5 506.523 19.4988   2
   1   7   5 527.877 19.5195   2
  -2  -7  -5 229.379 9.06200   2
  -2  -7  -5 220.222 14.5014   1
   2   7   5 242.152 16.0052   5
   2   7   5 220.767 8.98133   2
  -3  -7  -5 498.192 19.0442   2
  -3  -7  -5 492.848 25.7362   1
   3   7   5 505.074 18.9844   2
   3   7   5 516.962 26.7738   5
  -4  -7  -5 413.760 24.0966   1
  -4  -7  -5 435.131 16.7990   2
   4   7   5 443.065 16.6910   2
   4   7   5 458.382 25.2719   5
  -5  -7  -5 228.359 9.35249   2
  -5  -7  -5 225.111 18.0486   1
   5   7   5 215.507 16.7622   5
   5   7   5 232.847 9.20010   2
  -6  -7  -5 41.2850 2.86473   2
   6   7   5 54.9031 10.3226   5
   6   7   5 47.7175 2.93018   2
  -7  -7  -5 35.2473 2.65626   2
  -7  -7  -5 34.0092 15.7349   1
   7   7   5 20.1850 7.46381   5
   7   7   5 35.9803 2.39309   2
  -8  -7  -5 297.644 11.4268   2
   8   7   5 274.940 20.4182   5
   8   7   5 266.758 10.8925   2
  -9  -7  -5 257.921 11.5293   2
 -10  -7  -5 62.2299 3.35843   2
 -11  -7  -5 45.2299 3.13936   2
  12  -8  -5 0.86738 0.67947   4
  12  -8  -5 2.66968 0.89940   3
  11  -8  -5 -0.5186 0.68228   3
  11  -8  -5 -0.4493 0.64137   4
  10  -8  -5 49.1139 2.84586   4
  10  -8  -5 46.8596 3.61222   3
   9  -8  -5 118.896 5.55346   4
   9  -8  -5 128.496 6.09497   3
   8  -8  -5 103.772 5.35862   3
   8  -8  -5 107.066 4.96216   4
   7  -8  -5 123.944 6.05374   3
   7  -8  -5 129.572 5.72982   4
   6  -8  -5 310.370 11.9847   4
   6  -8  -5 292.271 12.2027   3
   5  -8  -5 82.7282 4.00380   4
  -5   8   5 78.0776 3.77199   2
   4  -8  -5 191.415 7.70621   4
   4  -8  -5 186.302 9.41766   1
  -4   8   5 178.427 7.43285   2
   3  -8  -5 2.94785 0.85716   4
   3  -8  -5 7.29781 3.89968   1
  -3   8   5 6.23667 8.78167   5
  -3   8   5 4.77671 0.94872   2
   2  -8  -5 80.3169 7.84638   1
   2  -8  -5 80.0572 3.79802   4
  -2   8   5 78.0018 3.68171   2
  -2   8   5 87.7105 12.2135   5
   1  -8  -5 119.435 9.65925   1
   1  -8  -5 112.348 4.93310   4
  -1   8   5 107.969 12.4985   5
  -1   8   5 111.405 4.88362   2
   0  -8  -5 17.2861 4.89671   1
   0  -8  -5 12.6824 1.40112   4
   0   8   5 13.0902 5.97163   5
   0   8   5 13.5336 1.45131   2
  -1  -8  -5 261.558 16.6198   1
   1   8   5 285.848 11.0248   2
   1   8   5 295.874 18.9178   5
  -2  -8  -5 1.10664 0.95815   2
   2   8   5 0.26256 5.07991   5
  -3  -8  -5 19.7076 1.89334   2
  -3  -8  -5 11.7524 5.82995   1
   3   8   5 17.1183 7.09649   5
   3   8   5 20.8490 1.85437   2
  -4  -8  -5 47.0268 2.81431   2
  -4  -8  -5 41.5588 10.7017   1
   4   8   5 62.7397 15.0759   5
   4   8   5 45.4606 2.81280   2
  -5  -8  -5 -0.0453 0.84148   2
  -5  -8  -5 -5.6283 7.71635   1
   5   8   5 1.36094 0.95537   2
   5   8   5 6.55621 6.09022   5
  -6  -8  -5 194.549 8.24901   2
  -6  -8  -5 231.206 33.1826   1
   6   8   5 178.639 16.7213   5
   6   8   5 199.063 8.11282   2
  -7  -8  -5 1.11795 0.91288   2
   7   8   5 1.06198 0.90597   2
   7   8   5 -5.1765 7.18894   5
  -8  -8  -5 101.823 5.84479   2
   8   8   5 121.560 4.95699   2
  -9  -8  -5 3.31466 0.95624   2
 -10  -8  -5 22.1938 1.95557   2
  12  -9  -5 45.5976 2.38381   4
  11  -9  -5 64.1205 3.26605   4
  10  -9  -5 22.3647 1.87170   4
   9  -9  -5 39.5815 2.55247   4
   8  -9  -5 201.750 8.42121   4
   7  -9  -5 50.4087 3.01461   4
   6  -9  -5 7.25410 1.36089   4
   5  -9  -5 51.5044 2.98038   4
  -5   9   5 47.6410 2.78272   2
   4  -9  -5 26.2647 2.07750   4
  -4   9   5 25.8903 1.95673   2
   3  -9  -5 23.2184 5.52324   1
   3  -9  -5 20.1041 1.83594   4
  -3   9   5 19.9373 1.65641   2
   2  -9  -5 9.64237 1.40220   4
   2  -9  -5 11.2189 4.91098   1
  -2   9   5 8.48735 1.30109   2
  -2   9   5 8.22914 10.0382   5
   1  -9  -5 3.78132 4.41606   1
   1  -9  -5 2.08786 0.77959   4
  -1   9   5 13.9957 7.97564   5
  -1   9   5 1.70053 0.83340   2
   0  -9  -5 184.160 7.22333   4
   0  -9  -5 150.768 12.9945   1
   0   9   5 175.783 16.6509   5
   0   9   5 174.000 7.23285   2
  -1  -9  -5 32.8150 2.14569   4
  -1  -9  -5 20.6688 6.31841   1
   1   9   5 32.4503 2.27664   2
   1   9   5 23.2802 8.57446   5
  -2  -9  -5 111.033 12.5557   1
   2   9   5 117.361 15.2503   5
  -3  -9  -5 55.1707 11.3927   1
   3   9   5 50.8444 10.7605   5
   3   9   5 52.8843 3.04198   2
  -4  -9  -5 107.408 15.3167   1
  -4  -9  -5 90.8734 4.65929   2
   4   9   5 109.356 4.82687   2
   4   9   5 104.957 14.3082   5
   5   9   5 1.59690 0.93528   2
   5   9   5 -6.8151 7.60990   5
  -6  -9  -5 12.5493 1.72941   2
   6   9   5 16.0552 1.80557   2
  -7  -9  -5 2.66298 0.95667   2
   7   9   5 2.18787 0.90955   2
  -8  -9  -5 10.9184 1.50988   2
  -9  -9  -5 86.4873 4.79204   2
  11 -10  -5 10.1525 1.21190   4
  10 -10  -5 189.572 7.79338   4
   9 -10  -5 95.8217 4.48264   4
   8 -10  -5 -0.3882 0.62330   4
   7 -10  -5 1.10304 0.79119   4
   6 -10  -5 0.69674 0.78710   4
   5 -10  -5 209.360 8.46283   4
  -5  10   5 196.041 8.16611   2
   4 -10  -5 121.665 5.42423   4
  -4  10   5 117.460 5.23260   2
   3 -10  -5 19.3157 1.76743   4
   3 -10  -5 15.1607 6.62308   1
  -3  10   5 21.9240 1.81300   2
   2 -10  -5 340.963 19.3740   1
   2 -10  -5 356.735 13.6481   4
  -2  10   5 350.377 13.5391   2
   1 -10  -5 68.8710 3.51432   4
   1 -10  -5 72.1731 10.6845   1
  -1  10   5 80.7980 19.4031   5
  -1  10   5 71.7489 3.60746   2
   0 -10  -5 47.3960 11.2737   1
   0 -10  -5 47.3448 2.74056   4
   0  10   5 62.0493 16.7868   5
   0  10   5 50.9709 2.86604   2
  -1 -10  -5 97.4823 14.2977   1
   1  10   5 113.047 17.3550   5
   1  10   5 130.091 5.53696   2
  -2 -10  -5 168.167 16.5635   1
   2  10   5 207.201 7.96304   2
   2  10   5 152.879 17.7286   5
   3  10   5 179.494 7.56927   2
   4  10   5 1.84885 9.49678   5
   4  10   5 5.47407 1.22446   2
  -5 -10  -5 10.3217 1.66334   2
   5  10   5 9.36845 1.59233   2
  -6 -10  -5 3.18210 0.94441   2
   6  10   5 8.41861 1.51679   2
   7  10   5 43.6593 2.39808   2
  -8 -10  -5 24.4000 1.83854   2
  10 -11  -5 -0.0466 0.50542   4
   9 -11  -5 31.8182 2.07816   4
   8 -11  -5 36.4787 2.29714   4
   7 -11  -5 1.16498 0.73811   4
   6 -11  -5 -0.9412 0.60126   4
   5 -11  -5 18.8104 1.77932   4
  -5  11   5 21.4625 1.96019   2
   4 -11  -5 3.04411 0.88647   4
  -4  11   5 0.60469 0.80656   2
   3 -11  -5 1.94405 0.84138   4
  -3  11   5 0.94128 0.81902   2
   2 -11  -5 1.15370 0.71464   4
  -2  11   5 0.33276 0.79207   2
   1 -11  -5 18.4661 1.71259   4
  -1  11   5 20.1359 1.90597   2
   0 -11  -5 0.48084 0.82615   4
   0  11   5 -0.8387 0.89741   2
   1  11   5 0.07349 0.87677   2
   2  11   5 9.60082 1.61502   2
   3  11   5 14.1117 1.74071   2
   4  11   5 8.76166 1.53110   2
   5  11   5 13.3123 1.56577   2
   6  11   5 0.64655 0.72513   2
   9 -12  -5 2.91773 0.72788   4
   8 -12  -5 33.2762 2.07123   4
   7 -12  -5 1.28367 0.68709   4
   6 -12  -5 19.2729 1.65441   4
   5 -12  -5 1.03627 0.67732   4
   4 -12  -5 15.8698 1.56438   4
  -4  12   5 17.9365 1.66871   2
   3 -12  -5 4.00372 0.85387   4
  -3  12   5 6.95061 1.36980   2
   2 -12  -5 2.08621 0.72429   4
  -2  12   5 0.93054 0.80575   2
   1 -12  -5 1.83987 0.82432   4
  -1  12   5 0.48436 0.77682   2
   0  12   5 23.3909 1.92405   2
   1  12   5 111.335 5.01730   2
   2  12   5 -0.8988 0.74335   2
   3  12   5 50.1922 2.77141   2
   4  12   5 1.72201 0.79097   2
   5  12   5 1.06416 0.91266   2
   7 -13  -5 -0.1015 0.48789   4
   6 -13  -5 74.8381 3.46629   4
   5 -13  -5 8.06128 1.58795   4
   4 -13  -5 75.0824 3.85725   4
   3 -13  -5 131.099 5.47941   4
   2 -13  -5 17.8346 1.79415   4
  -2  13   5 21.7636 1.65395   2
  -1  13   5 -0.4030 0.63189   2
   0  13   5 0.24157 0.67332   2
   2  13   5 218.072 8.67052   2
   3  13   5 12.5459 1.27470   2
  -1  14   5 0.87374 0.57707   2
   3  15  -6 126.992 5.21502   2
   2  15  -6 12.8500 1.34168   2
  -1  15  -6 5.47853 1.10587   2
   1 -15   6 6.74865 1.03946   4
  -2  15  -6 86.1931 3.77433   2
   2 -15   6 83.3719 3.78992   4
  -3  15  -6 24.4564 1.84626   2
   4 -15   6 62.3134 3.04524   4
   5 -15   6 11.9848 1.19365   4
   5  14  -6 7.23034 1.04599   2
   4  14  -6 66.3988 3.23169   2
   3  14  -6 1.77841 0.77314   2
   2  14  -6 121.409 5.28560   2
   1  14  -6 80.5954 3.86062   2
   0  14  -6 63.6216 3.26519   2
   0 -14   6 63.9430 3.15389   4
  -1  14  -6 623.245 23.0883   2
   1 -14   6 611.047 23.1354   4
  -2  14  -6 142.432 5.85473   2
   2 -14   6 134.013 5.96117   4
  -3  14  -6 -0.3442 0.71330   2
   3 -14   6 0.07546 0.64806   4
  -4  14  -6 -1.4275 1.24640   2
   4 -14   6 -0.1929 0.68901   4
   5 -14   6 8.60670 1.34515   4
   6 -14   6 79.6873 3.84063   4
   7 -14   6 75.3562 4.62485   4
   8 -14   6 31.3140 1.84735   4
   6  13  -6 52.2700 2.71059   2
   4  13  -6 92.6495 4.35536   2
   2  13  -6 29.4758 2.26186   2
   1  13  -6 230.798 9.19820   2
  -1 -13   6 218.688 9.92182   4
   0  13  -6 308.705 11.9900   2
   0 -13   6 297.971 11.9546   4
  -1  13  -6 0.52425 0.76787   2
   1 -13   6 -0.4368 0.68652   4
  -2  13  -6 67.3941 3.43220   2
   2 -13   6 65.7994 3.58943   4
  -3  13  -6 80.8616 4.48165   2
   3 -13   6 88.1611 4.32269   4
  -4  13  -6 7.56155 1.18293   2
   4 -13   6 10.6402 1.55273   4
   6 -13   6 9.92041 1.48507   4
   8 -13   6 73.4614 3.56251   4
   9 -13   6 40.2380 2.20658   4
   7  12  -6 4.35296 0.90275   2
  -7 -12   6 4.53437 1.09378   2
   6  12  -6 3.30588 0.94562   2
  -6 -12   6 -0.9727 1.55442   2
   5  12  -6 59.6475 3.24205   2
   4  12  -6 96.1997 4.56848   2
   3  12  -6 99.4263 15.3833   5
   3  12  -6 118.044 5.33628   2
   2  12  -6 82.1798 3.97737   2
   2  12  -6 72.1508 14.3028   5
  -2 -12   6 73.4433 3.72943   4
   1  12  -6 15.5611 1.80987   2
   1  12  -6 7.70607 9.19802   5
  -1 -12   6 15.1495 8.38283   1
  -1 -12   6 15.5363 1.65479   4
   0  12  -6 45.9344 2.81713   2
   0  12  -6 33.9154 11.5332   5
   0 -12   6 48.5553 11.1329   1
   0 -12   6 46.6492 2.84557   4
  -1  12  -6 3.65681 0.97741   2
   1 -12   6 2.81932 0.93408   4
   1 -12   6 8.12385 7.20367   1
  -2  12  -6 45.6770 2.72792   2
   2 -12   6 45.3732 2.95883   4
   2 -12   6 46.7604 10.9572   1
  -3  12  -6 259.446 10.6178   2
   3 -12   6 278.967 11.0864   4
  -4  12  -6 4.24891 0.98740   2
   4 -12   6 1.95490 0.94612   4
   5 -12   6 17.4876 1.91675   4
   6 -12   6 0.72691 0.78906   4
   7 -12   6 54.3870 3.26580   4
   8 -12   6 8.88658 1.32054   4
   9 -12   6 1.08460 0.62271   4
  10 -12   6 249.473 9.69941   4
 -10 -11   6 18.8501 1.60050   2
  -9 -11   6 32.7395 2.42918   2
   8  11  -6 -0.2773 0.70506   2
  -8 -11   6 -1.3725 0.70084   2
   7  11  -6 84.3993 3.99376   2
  -7 -11   6 83.2231 4.15238   2
   6  11  -6 19.9777 1.91763   2
  -6 -11   6 18.4197 1.96373   2
   5  11  -6 165.901 7.00500   2
  -5 -11   6 159.545 7.02717   2
   4  11  -6 -1.1384 6.37170   5
   4  11  -6 -0.3633 0.82286   2
  -4 -11   6 0.90321 0.98121   2
  -4 -11   6 -7.6675 8.43487   1
   3  11  -6 36.5116 2.46102   2
   3  11  -6 32.0934 8.40107   5
  -3 -11   6 36.2377 2.32831   4
  -3 -11   6 28.2312 9.56167   1
   2  11  -6 6.13064 7.24659   5
   2  11  -6 4.06940 1.07483   2
  -2 -11   6 -1.8237 6.16380   1
  -1 -11   6 4.31130 5.69491   1
  -1 -11   6 9.35902 1.48369   4
   0  11  -6 278.661 20.3908   5
   0  11  -6 323.847 12.2866   2
   0 -11   6 313.545 19.0314   1
   0 -11   6 310.152 12.4105   4
  -1  11  -6 144.100 6.29606   2
  -1  11  -6 160.286 16.3510   5
   1 -11   6 131.639 12.1085   1
   1 -11   6 147.940 6.55660   4
  -2  11  -6 7.52211 1.49834   2
   2 -11   6 14.5767 5.57364   1
   2 -11   6 4.83943 1.60031   4
   3 -11   6 5.73056 4.74308   1
   4 -11   6 28.5124 2.46985   4
  -5  11  -6 281.642 11.7931   2
   5 -11   6 315.431 12.2250   4
   6 -11   6 109.860 5.32179   4
   7 -11   6 187.067 8.06269   4
   8 -11   6 314.997 12.5652   4
   9 -11   6 93.8121 4.45062   4
  10 -11   6 12.8791 1.35775   4
  11 -11   6 3.14002 0.84970   4
 -11 -10   6 80.9766 3.85789   2
 -10 -10   6 53.5154 2.88088   2
  -9 -10   6 123.104 5.53508   2
   8  10  -6 32.9149 2.19795   2
   7  10  -6 222.407 8.91336   2
   7  10  -6 193.249 17.0326   5
  -7 -10   6 228.814 9.25369   2
   6  10  -6 582.583 22.2757   2
   6  10  -6 565.831 30.2435   5
  -6 -10   6 615.218 22.5743   2
   5  10  -6 160.522 6.84453   2
   5  10  -6 157.130 14.0944   5
  -5 -10   6 158.142 6.93934   2
  -5 -10   6 151.037 18.0463   1
   4  10  -6 0.78278 6.07699   5
  -4 -10   6 -0.2322 7.17883   1
  -4 -10   6 1.32593 1.01766   2
   3  10  -6 553.497 29.0782   5
   3  10  -6 585.193 21.9653   2
  -3 -10   6 588.286 21.9338   2
  -3 -10   6 581.884 30.6928   1
  -3 -10   6 579.430 21.8623   4
   2  10  -6 0.89801 0.90066   2
   2  10  -6 1.10412 4.83300   5
  -2 -10   6 -2.2578 5.04784   1
  -2 -10   6 0.26602 1.07373   2
  -2 -10   6 0.57781 0.73498   4
   1  10  -6 665.040 24.5694   2
   1  10  -6 661.267 31.5784   5
  -1 -10   6 633.843 24.5984   4
   0  10  -6 3.94853 0.97662   2
   0  10  -6 10.0403 6.45579   5
   0 -10   6 3.67794 1.02471   4
   0 -10   6 1.77416 4.72553   1
  -1  10  -6 509.610 19.2886   2
  -1  10  -6 488.275 26.0233   5
   1 -10   6 497.343 24.7227   1
   1 -10   6 529.704 19.6078   4
  -2  10  -6 980.678 44.0009   5
  -2  10  -6 1000.60 37.1186   2
   2 -10   6 1030.04 37.5083   4
   2 -10   6 1004.89 41.8669   1
  -3  10  -6 2.29825 0.92746   2
   3 -10   6 2.41228 3.72439   1
   3 -10   6 2.68111 1.08312   4
  -4  10  -6 58.1405 3.10487   2
   4 -10   6 58.3969 3.45228   4
  -5  10  -6 2.81537 1.06553   2
   5 -10   6 1.47479 0.97394   4
   6 -10   6 557.023 21.4378   4
   7 -10   6 -0.3745 0.75328   4
   8 -10   6 29.6486 2.31799   4
   9 -10   6 237.979 9.42418   4
   9 -10   6 219.536 9.59163   3
  10 -10   6 -0.0536 1.29699   3
  10 -10   6 2.42055 0.83095   4
  11 -10   6 0.26034 0.63157   4
 -11  -9   6 16.0858 1.58155   2
 -10  -9   6 76.5334 3.90046   2
  -9  -9   6 9.69405 1.67005   2
   8   9  -6 37.9532 8.60104   5
   8   9  -6 32.9207 2.26770   2
  -8  -9   6 36.8873 2.62874   2
   7   9  -6 46.8567 2.73995   2
   7   9  -6 48.4269 9.98241   5
  -7  -9   6 46.9013 3.03943   2
  -7  -9   6 40.2618 15.7023   1
   6   9  -6 106.136 11.5777   5
   6   9  -6 106.925 4.94130   2
  -6  -9   6 83.1665 17.0037   1
  -6  -9   6 108.315 5.13032   2
   5   9  -6 109.436 11.0420   5
   5   9  -6 114.890 5.08075   2
  -5  -9   6 95.5614 13.8616   1
  -5  -9   6 108.360 5.18551   2
   4   9  -6 1.74288 1.01816   2
   4   9  -6 1.80472 4.39191   5
  -4  -9   6 1.29031 0.82303   4
  -4  -9   6 12.5476 9.90576   1
  -4  -9   6 -0.1198 0.86718   2
   3   9  -6 299.099 11.8344   2
   3   9  -6 312.353 18.2291   5
  -3  -9   6 295.111 19.1270   1
  -3  -9   6 299.149 11.8862   2
   2   9  -6 73.5008 9.04306   5
   2   9  -6 74.6041 3.68136   2
  -2  -9   6 74.1362 3.64680   2
  -2  -9   6 64.8665 8.53965   1
   1   9  -6 88.3909 9.56648   5
   1   9  -6 97.4667 4.32770   2
  -1  -9   6 87.4759 4.29470   2
  -1  -9   6 101.575 9.63686   1
   0   9  -6 207.589 8.32327   2
   0   9  -6 198.306 13.5907   5
   0  -9   6 206.576 13.3509   1
  -1   9  -6 55.9773 3.66538   2
  -1   9  -6 45.9349 7.98005   5
   1  -9   6 57.5424 6.96837   1
  -2   9  -6 124.084 6.30706   2
  -2   9  -6 126.817 11.5449   5
   2  -9   6 125.494 9.33488   1
  -3   9  -6 2.30661 0.92868   2
  -3   9  -6 8.97254 6.21365   5
   3  -9   6 0.53908 0.83631   4
   3  -9   6 2.62008 3.02092   1
  -4   9  -6 217.725 9.76586   2
   4  -9   6 253.118 9.97973   4
   4  -9   6 248.173 10.6639   1
   5  -9   6 0.09630 0.90192   4
   6  -9   6 180.079 8.26131   3
   6  -9   6 209.082 8.39069   4
   7  -9   6 9.95808 2.41629   4
   7  -9   6 7.03453 1.56979   3
   8  -9   6 62.4917 3.46329   4
   8  -9   6 57.7325 3.66264   3
   9  -9   6 197.769 8.60403   3
   9  -9   6 196.838 8.26626   4
  10  -9   6 59.3424 4.86426   3
  10  -9   6 74.9613 4.06945   4
  11  -9   6 121.981 5.74879   3
  12  -9   6 31.6865 2.36321   3
 -12  -8   6 1.13803 0.77541   2
 -11  -8   6 0.87079 0.84283   2
 -10  -8   6 0.40047 1.37850   2
   9   8  -6 87.8582 12.4379   5
  -9  -8   6 91.9389 4.66128   2
   8   8  -6 50.2115 9.38056   5
   8   8  -6 53.2969 2.99248   2
  -8  -8   6 56.7555 3.38709   2
   7   8  -6 14.5615 5.39286   5
  -7  -8   6 1.26931 11.1693   1
  -7  -8   6 16.8321 2.08704   2
   6   8  -6 67.0843 3.48502   2
   6   8  -6 64.0596 8.84673   5
  -6  -8   6 69.5655 3.73389   2
   5   8  -6 6.66037 4.47006   5
   5   8  -6 5.29867 1.11839   2
  -5  -8   6 5.00245 1.16103   2
  -5  -8   6 4.33565 6.74873   1
   4   8  -6 157.206 6.42948   2
   4   8  -6 148.470 11.5786   5
  -4  -8   6 149.560 6.48740   2
  -4  -8   6 137.393 12.8246   1
   3   8  -6 17.0897 4.96707   5
   3   8  -6 12.6112 1.49037   2
  -3  -8   6 15.6205 1.64526   2
  -3  -8   6 13.7571 5.65947   1
   2   8  -6 -1.0477 3.31272   5
  -2  -8   6 0.91675 0.74146   2
  -2  -8   6 3.77731 3.55476   1
   1   8  -6 205.763 8.26606   2
   1   8  -6 225.604 13.1684   5
  -1  -8   6 194.500 8.18490   2
  -1  -8   6 208.123 13.2582   1
   0   8  -6 17.0869 4.58687   5
   0   8  -6 9.26979 1.21248   2
   0  -8   6 16.9261 4.61070   1
  -1   8  -6 825.534 35.2979   5
  -1   8  -6 818.571 30.7816   2
   1  -8   6 859.527 35.6224   1
  -2   8  -6 498.034 19.3600   2
  -2   8  -6 519.412 23.7485   5
   2  -8   6 537.414 23.4160   1
  -3   8  -6 17.8589 1.63771   2
  -3   8  -6 23.8147 5.41439   5
   3  -8   6 21.9323 4.24258   1
  -4   8  -6 16.7821 1.56686   2
   4  -8   6 21.1601 4.98610   1
   4  -8   6 14.1041 1.82824   3
   4  -8   6 13.6974 3.52102   1
   5  -8   6 44.8617 3.01585   3
   5  -8   6 52.8049 3.02890   4
   6  -8   6 649.070 24.1472   4
   6  -8   6 622.525 24.1189   3
   7  -8   6 1625.88 59.3088   4
   7  -8   6 1600.13 59.4380   3
   8  -8   6 232.241 10.6521   3
   9  -8   6 7.43402 1.39782   4
   9  -8   6 4.95396 1.34676   3
  10  -8   6 1.24368 0.81989   4
  10  -8   6 0.99694 1.10351   3
  11  -8   6 5.65862 1.31740   3
  12  -8   6 205.277 8.73686   3
  13  -8   6 1.85953 0.94302   3
 -13  -7   6 2.47441 0.72254   2
 -12  -7   6 301.718 11.9227   2
 -11  -7   6 406.516 15.8788   2
 -10  -7   6 100.630 4.99024   2
   9   7  -6 38.8000 9.60156   5
  -9  -7   6 45.2990 2.99991   2
   8   7  -6 214.317 8.76330   2
   8   7  -6 223.559 14.7940   5
  -8  -7   6 221.253 9.25888   2
   7   7  -6 1596.78 58.5024   2
  -7  -7   6 1638.27 58.9411   2
  -7  -7   6 1560.51 69.4124   1
   6   7  -6 353.421 18.6867   5
   6   7  -6 320.612 12.9417   2
  -6  -7   6 333.914 13.2731   2
  -6  -7   6 345.957 22.3211   1
   5   7  -6 442.798 22.3081   5
   5   7  -6 436.734 16.9050   2
  -5  -7   6 443.625 17.1042   2
  -5  -7   6 462.953 24.6015   1
   4   7  -6 574.346 26.4933   5
  -4  -7   6 563.610 21.4465   2
  -4  -7   6 567.257 28.0356   1
   3   7  -6 903.757 37.5103   5
   3   7  -6 867.606 32.4137   2
  -3  -7   6 878.995 38.6219   1
  -3  -7   6 864.916 32.4840   2
   2   7  -6 3351.08 122.307   5
  -2  -7   6 3116.66 130.242   1
   1   7  -6 1443.01 55.7918   5
  -1  -7   6 1371.06 51.2792   2
   0   7  -6 1820.38 70.3019   5
  -1   7  -6 2351.75 89.4043   1
  -1   7  -6 2271.89 87.6537   5
  -2   7  -6 52.6762 10.3559   1
  -2   7  -6 47.6788 8.86116   5
  -2   7  -6 44.0879 2.36811   2
  -3   7  -6 1576.68 61.5601   5
  -3   7  -6 1521.97 58.1453   2
   3  -7   6 1705.16 65.1933   1
  -4   7  -6 931.846 38.6370   5
  -4   7  -6 916.599 35.2524   2
   4  -7   6 1005.60 35.9509   3
   4  -7   6 973.588 37.4877   1
   4  -7   6 974.408 38.0049   1
   5  -7   6 1126.95 41.6810   3
   6  -7   6 752.589 28.5096   4
   6  -7   6 770.677 30.4543   3
   7  -7   6 488.993 18.8930   4
   7  -7   6 497.767 19.1764   3
   8  -7   6 297.470 12.4583   3
   8  -7   6 310.633 12.1057   4
   9  -7   6 196.005 8.68442   4
   9  -7   6 193.265 8.65949   3
  10  -7   6 13.9540 2.14806   3
  10  -7   6 13.8369 1.58541   4
  11  -7   6 1.95701 1.04599   3
  12  -7   6 101.912 5.15449   3
  13  -7   6 214.509 8.96675   3
 -13  -6   6 3.53023 0.97624   2
 -12  -6   6 35.2449 2.47085   2
 -11  -6   6 32.4522 2.46268   2
 -10  -6   6 6.99979 1.35566   2
   9   6  -6 -4.3344 5.18929   5
  -9  -6   6 1.83789 1.08183   2
   8   6  -6 419.990 16.3056   2
   8   6  -6 422.811 21.6819   5
  -8  -6   6 449.936 16.9112   2
   7   6  -6 29.0122 2.03939   2
   7   6  -6 34.3375 6.39245   5
  -7  -6   6 27.3264 2.25674   2
  -7  -6   6 29.5997 9.93097   1
   6   6  -6 382.270 14.6825   2
   6   6  -6 381.673 19.4477   5
  -6  -6   6 392.846 22.4144   1
  -6  -6   6 383.052 14.9440   2
   5   6  -6 80.4729 3.73977   2
   5   6  -6 83.7975 9.60163   5
  -5  -6   6 86.1328 9.79766   1
  -5  -6   6 80.2996 3.94245   2
   4   6  -6 1981.07 77.4055   5
  -4  -6   6 2024.91 79.3466   1
   3   6  -6 375.124 18.1470   5
   3   6  -6 379.022 14.1009   2
  -3  -6   6 359.131 14.1431   2
   2   6  -6 0.80411 0.70218   2
   2   6  -6 0.25106 2.38989   5
   2   6  -6 2.17394 3.39937   1
  -2  -6   6 1.09681 0.64249   2
   1   6  -6 426.243 19.2977   5
   1   6  -6 412.794 15.8511   2
   1   6  -6 429.284 20.6552   1
   0   6  -6 1599.75 62.4739   1
   0   6  -6 1583.01 61.2566   5
  -1   6  -6 421.277 20.2232   1
  -1   6  -6 422.779 18.8515   5
  -2   6  -6 202.949 11.1911   5
  -2   6  -6 242.054 18.4660   1
  -3   6  -6 956.248 39.6211   1
  -3   6  -6 988.918 38.1387   5
   3  -6   6 937.687 38.7996   1
  -4   6  -6 9.99323 3.84530   5
   4  -6   6 13.8975 3.94165   1
   4  -6   6 8.44324 1.43479   3
  -5   6  -6 600.898 26.1746   5
   5  -6   6 635.518 24.3646   1
   5  -6   6 614.980 23.3185   3
   6  -6   6 43.4104 2.56811   4
   6  -6   6 41.0019 2.71138   3
   7  -6   6 2.00220 0.78811   4
   7  -6   6 0.76678 0.91355   3
   8  -6   6 300.471 11.8805   4
   8  -6   6 302.618 12.3781   3
   9  -6   6 236.130 9.97791   3
   9  -6   6 224.659 9.22880   4
  10  -6   6 182.252 8.31138   3
  11  -6   6 265.553 11.3158   3
  12  -6   6 2.87341 1.17123   3
  13  -6   6 0.59071 0.81956   3
  14  -6   6 9.37733 1.43827   3
 -14  -5   6 0.56396 0.61863   2
 -13  -5   6 3.44453 0.91550   2
 -12  -5   6 7.67545 1.51970   2
 -11  -5   6 54.9679 3.30084   2
  10   5  -6 253.047 10.7572   3
 -10  -5   6 277.870 10.9761   2
   9   5  -6 35.0979 7.58468   5
   9   5  -6 44.5357 2.87845   3
  -9  -5   6 45.4548 2.95750   2
   8   5  -6 114.298 5.59404   3
   8   5  -6 118.518 9.47913   5
   8   5  -6 136.881 5.64547   2
  -8  -5   6 123.826 5.69710   2
   7   5  -6 66.7797 7.05784   5
   7   5  -6 64.7135 3.20152   2
   7   5  -6 64.8662 3.46107   3
  -7  -5   6 64.1715 12.2872   1
  -7  -5   6 65.6756 3.50419   2
   6   5  -6 12.1515 1.73588   3
   6   5  -6 14.3984 1.40513   2
  -6  -5   6 23.7840 6.94254   1
  -6  -5   6 15.6827 1.69416   2
   5   5  -6 109.589 8.07117   5
   5   5  -6 109.368 4.77424   2
  -5  -5   6 120.305 10.3743   1
  -5  -5   6 111.899 4.96237   2
   4   5  -6 35.3153 4.87090   5
   4   5  -6 22.5472 4.93776   1
   4   5  -6 28.9698 1.79851   2
  -4  -5   6 28.2827 1.95939   2
   3   5  -6 194.309 11.7459   1
   3   5  -6 172.820 7.09527   2
   3   5  -6 176.878 10.2031   5
  -3  -5   6 175.973 7.17246   2
   2   5  -6 73.3840 3.35736   2
   2   5  -6 76.3139 7.11630   1
   2   5  -6 77.6366 5.96821   5
   1   5  -6 404.425 19.2726   1
   1   5  -6 416.737 18.3516   5
   0   5  -6 9.41250 2.68318   5
   0   5  -6 2.70008 2.84164   1
  -1   5  -6 554.240 24.0577   1
  -1   5  -6 554.737 23.1839   5
  -2   5  -6 289.704 13.6617   5
  -2   5  -6 306.408 18.9428   1
   2  -5   6 298.855 15.1809   1
  -3   5  -6 35.6083 4.37541   5
  -3   5  -6 28.5412 5.31827   1
   3  -5   6 24.0403 3.18475   5
   3  -5   6 29.1492 2.52948   5
  -4   5  -6 78.2538 6.17850   5
   4  -5   6 72.7654 3.66561   3
  -5   5  -6 360.697 16.9124   5
   5  -5   6 379.023 16.1378   1
   5  -5   6 362.228 14.2596   3
   6  -5   6 14.2723 1.47491   4
   6  -5   6 12.9513 1.61695   3
   7  -5   6 251.220 10.2929   3
   7  -5   6 247.893 9.90398   4
   8  -5   6 6.63805 1.35011   3
   8  -5   6 6.63914 1.15257   4
   9  -5   6 2.66527 1.22617   3
   9  -5   6 6.12325 1.15854   4
  10  -5   6 2.49239 1.23619   3
  11  -5   6 8.95370 2.00249   3
  12  -5   6 13.3025 2.10908   3
  13  -5   6 225.848 9.58161   3
  14  -5   6 1.53483 0.80929   3
 -14  -4   6 -0.2444 0.60648   2
 -13  -4   6 272.853 10.8890   2
  12   4  -6 109.584 5.23536   3
 -12  -4   6 117.835 5.37429   2
  11   4  -6 52.1438 3.25545   3
 -11  -4   6 57.8116 3.33740   2
  10   4  -6 29.0881 2.75958   3
 -10  -4   6 26.9271 2.38687   2
   9   4  -6 11.4119 4.54452   5
   9   4  -6 13.3118 1.72418   3
  -9  -4   6 12.8225 1.74870   2
   8   4  -6 529.981 23.9322   5
   8   4  -6 530.793 20.5915   3
  -8  -4   6 552.806 20.5674   2
   7   4  -6 199.857 8.43852   2
   7   4  -6 213.668 8.93124   3
  -7  -4   6 239.970 9.21515   2
  -7  -4   6 215.851 16.3260   1
   6   4  -6 1064.48 40.6066   2
   6   4  -6 1140.63 41.3518   3
   6   4  -6 1126.71 44.5363   5
  -6  -4   6 1105.24 40.9065   2
  -6  -4   6 1121.01 47.2055   1
   5   4  -6 3730.40 138.589   5
   4   4  -6 3632.58 136.663   5
   4   4  -6 3745.71 138.401   1
   3   4  -6 243.040 12.0654   5
   3   4  -6 237.243 12.9981   1
   2   4  -6 80.3532 5.79681   5
   2   4  -6 91.8284 6.80867   1
   1   4  -6 2733.93 101.880   1
   1   4  -6 2695.76 100.824   5
   0   4  -6 4343.27 156.826   5
   0   4  -6 4202.86 157.567   1
  -1   4  -6 499.549 20.7770   5
  -1   4  -6 505.162 21.6952   1
  -2   4  -6 4266.01 150.887   5
  -2   4  -6 4188.54 151.820   1
   2  -4   6 3889.56 151.561   1
  -3   4  -6 3813.46 143.946   5
  -3   4  -6 4060.33 145.204   1
   3  -4   6 3902.28 144.792   1
   3  -4   6 3926.65 143.033   5
  -4   4  -6 1616.24 60.1060   1
  -4   4  -6 1528.33 58.7435   5
   4  -4   6 1527.01 59.2158   1
   4  -4   6 1534.69 56.7037   3
  -5   4  -6 1091.91 42.4877   5
   5  -4   6 1073.45 40.0479   3
   5  -4   6 1092.13 42.4523   1
  -6   4  -6 452.034 20.3714   5
   6  -4   6 425.539 19.0336   1
   6  -4   6 460.453 17.2089   3
  -7   4  -6 866.592 35.3108   2
   7  -4   6 960.963 34.6265   4
   7  -4   6 988.141 35.3636   3
   8  -4   6 786.163 28.9729   3
   8  -4   6 742.826 28.2894   4
   9  -4   6 1.01883 1.09877   3
  10  -4   6 260.590 11.1342   3
  11  -4   6 690.873 26.6808   3
  12  -4   6 401.014 16.1597   3
  13  -4   6 0.50269 0.80879   3
  14  -4   6 181.864 7.86667   3
 -14  -3   6 264.589 10.3560   2
  13   3  -6 9.52352 1.40907   3
 -13  -3   6 9.05290 1.51359   2
  12   3  -6 148.346 6.88562   3
 -12  -3   6 159.715 6.82048   2
  11   3  -6 565.556 22.2546   3
 -11  -3   6 586.513 22.0583   2
  10   3  -6 13.6330 1.90250   3
 -10  -3   6 14.5476 1.87957   2
   9   3  -6 33.4014 2.55165   3
  -9  -3   6 37.1512 2.53084   2
   8   3  -6 284.504 11.7591   3
   8   3  -6 293.461 14.2310   5
  -8  -3   6 297.847 11.6120   2
   7   3  -6 459.340 20.1131   5
   7   3  -6 452.066 17.4654   3
  -7  -3   6 441.386 17.2615   2
  -7  -3   6 464.794 24.7354   1
   6   3  -6 139.554 8.46232   5
  -6  -3   6 140.321 5.93039   2
   5   3  -6 5.92040 2.96275   1
   5   3  -6 2.16087 2.14010   5
  -5  -3   6 2.85731 0.90771   2
   4   3  -6 146.637 8.23113   5
   4   3  -6 141.048 9.19910   1
   3   3  -6 794.778 32.9022   1
   3   3  -6 800.310 31.8145   5
   2   3  -6 678.187 27.7043   5
   2   3  -6 707.739 28.8645   1
   1   3  -6 10.7814 2.64185   1
   1   3  -6 4.24814 1.80942   5
   0   3  -6 224.098 10.9804   1
   0   3  -6 206.451 10.0188   5
  -1   3  -6 242.419 12.0431   1
  -1   3  -6 251.856 11.2806   5
  -2   3  -6 88.5317 6.44206   1
  -2   3  -6 88.2600 5.53070   5
   2  -3   6 100.615 8.11075   1
  -3   3  -6 737.093 29.6680   5
  -3   3  -6 740.399 33.1818   1
   3  -3   6 778.730 29.3198   5
  -4   3  -6 484.756 20.6287   5
  -4   3  -6 498.521 22.0582   1
   4  -3   6 501.869 19.4673   5
   4  -3   6 488.846 21.6600   1
  -5   3  -6 27.6867 4.59345   5
  -5   3  -6 29.9563 8.20383   1
   5  -3   6 23.4803 2.00511   3
   5  -3   6 32.5972 6.64931   1
   6  -3   6 119.556 5.31757   3
   6  -3   6 108.524 9.60860   1
  -7   3  -6 31.1318 2.14409   2
   7  -3   6 32.2916 2.44269   3
  -8   3  -6 203.067 8.21238   2
   8  -3   6 200.905 8.66422   3
  -9   3  -6 15.3755 1.91329   2
   9  -3   6 15.9586 2.15612   3
 -10   3  -6 53.9481 3.15735   2
  10  -3   6 51.0576 3.67102   3
 -11   3  -6 4.17348 1.28628   2
  11  -3   6 3.73138 1.47303   3
  12  -3   6 73.0191 4.27776   3
  13  -3   6 1.65131 1.12130   3
  14  -3   6 0.23444 0.72029   3
  14   2  -6 1.81928 0.70765   3
 -14  -2   6 2.14492 0.83437   2
  13   2  -6 12.4324 1.68086   3
 -13  -2   6 15.7465 1.68566   2
  12   2  -6 2.82723 1.16692   3
 -12  -2   6 -0.0011 0.82275   2
  11   2  -6 250.171 10.4781   3
 -11  -2   6 239.696 10.0476   2
  10   2  -6 164.928 7.62912   3
 -10  -2   6 173.748 7.32794   2
   9   2  -6 183.158 8.08368   3
  -9  -2   6 184.413 7.76339   2
   8   2  -6 3.95419 2.81788   5
   8   2  -6 1.44885 0.94355   3
  -8  -2   6 2.39994 0.93749   2
   7   2  -6 288.964 13.0500   5
   7   2  -6 275.931 11.1172   3
  -7  -2   6 254.172 18.1372   1
  -7  -2   6 277.034 10.8542   2
   6   2  -6 2.44494 1.94980   5
   6   2  -6 2.01327 2.55975   1
  -6  -2   6 2.97254 0.90840   2
   5   2  -6 380.546 18.1743   1
   5   2  -6 388.121 16.7633   5
   4   2  -6 368.097 16.5531   5
   4   2  -6 409.804 18.1142   1
   3   2  -6 1095.84 42.7666   1
   3   2  -6 1071.77 41.5955   5
   2   2  -6 2089.88 77.6825   5
   1   2  -6 7.88084 2.30276   1
   1   2  -6 10.3920 2.18177   5
   0   2  -6 1221.41 47.0250   1
   0   2  -6 1215.99 46.1198   5
  -1   2  -6 2486.03 91.8899   5
  -1   2  -6 2491.74 92.7764   1
  -2   2  -6 2.48953 1.66512   5
  -2   2  -6 2.56237 2.04783   1
   2  -2   6 2.57016 1.51326   5
  -3   2  -6 1676.99 67.5363   1
  -3   2  -6 1668.46 66.5451   5
   3  -2   6 1790.37 66.6323   5
   3  -2   6 2003.84 73.7125   1
  -4   2  -6 631.004 26.1128   5
  -4   2  -6 656.719 27.3741   1
   4  -2   6 608.669 27.4034   1
   4  -2   6 665.047 25.6305   5
  -5   2  -6 1419.98 54.0118   1
  -5   2  -6 1394.27 52.5384   5
   5  -2   6 1264.89 53.4948   1
   5  -2   6 1346.33 50.8752   5
  -6   2  -6 30.9052 1.97284   2
   6  -2   6 30.6065 2.22033   3
  -7   2  -6 741.352 28.0234   2
   7  -2   6 772.148 28.4830   3
  -8   2  -6 327.969 12.7350   2
   8  -2   6 328.194 13.2130   3
  -9   2  -6 43.6026 2.66576   2
   9  -2   6 37.9560 2.96674   3
 -10   2  -6 22.4417 2.08562   2
  10  -2   6 19.8449 3.08754   3
 -11   2  -6 11.7982 1.85704   2
  11  -2   6 13.7869 2.23145   3
 -12   2  -6 17.0536 3.04245   2
  12  -2   6 11.2813 2.04113   3
  13  -2   6 196.009 8.52552   3
  14  -2   6 0.65504 0.96317   3
  15   1  -6 4.52510 0.90901   3
  14   1  -6 66.6023 3.48238   3
 -14  -1   6 59.4692 3.19018   2
  13   1  -6 74.8564 4.15691   3
 -13  -1   6 76.1135 3.79675   2
  12   1  -6 121.553 5.96336   3
 -12  -1   6 117.193 5.42660   2
  11   1  -6 4.09351 1.28458   3
 -11  -1   6 3.81762 1.10195   2
  10   1  -6 419.942 16.5182   3
 -10  -1   6 404.815 15.9477   2
   9   1  -6 185.550 8.22490   3
  -9  -1   6 188.058 7.81302   2
   8   1  -6 133.482 6.20135   3
  -8  -1   6 130.093 5.69310   2
   7   1  -6 1166.37 45.4388   4
   7   1  -6 1276.21 46.0105   3
   7   1  -6 1291.58 46.7785   5
  -7  -1   6 1242.81 45.6046   2
   6   1  -6 2106.40 78.7420   1
   6   1  -6 2107.46 76.6251   5
  -6  -1   6 1965.28 74.7820   2
   5   1  -6 262.472 12.9122   1
   5   1  -6 241.303 11.4020   5
   4   1  -6 559.274 24.4120   1
   4   1  -6 604.955 24.2227   5
   3   1  -6 1902.98 72.1543   1
   3   1  -6 1916.98 71.1008   5
   2   1  -6 531.037 21.3531   5
   1   1  -6 60.4873 4.72111   1
   1   1  -6 64.1856 4.24674   5
   0   1  -6 2406.79 87.7305   1
   0   1  -6 2293.82 86.8041   5
  -1   1  -6 1529.78 58.0853   1
  -1   1  -6 1516.70 57.2006   5
  -2   1  -6 2418.14 92.6267   1
  -2   1  -6 2493.43 91.8837   5
   2  -1   6 2525.40 92.0854   5
  -3   1  -6 11.4905 3.22146   1
  -3   1  -6 16.5000 3.03985   5
   3  -1   6 9.43637 2.51051   5
  -4   1  -6 79.6805 6.78351   1
  -4   1  -6 71.5237 5.72783   5
   4  -1   6 70.6872 5.39837   5
  -5   1  -6 162.085 11.1220   1
   5  -1   6 164.567 8.89677   5
   5  -1   6 163.514 8.09489   3
  -6   1  -6 3506.57 132.206   1
   6  -1   6 3501.06 128.937   5
  -7   1  -6 968.011 35.7861   2
   7  -1   6 974.702 36.2131   3
   8  -1   6 698.896 26.5812   3
  -9   1  -6 231.957 9.43313   2
   9  -1   6 235.036 9.99048   3
 -10   1  -6 1.02206 0.94839   2
  10  -1   6 0.05704 1.16539   3
 -11   1  -6 85.4873 4.25086   2
  11  -1   6 84.8664 4.81002   3
  12  -1   6 130.879 6.33259   3
 -13   1  -6 135.377 5.96083   2
  13  -1   6 134.398 6.27001   3
  14  -1   6 232.738 9.44940   3
  15   0  -6 77.9308 3.73982   3
  14   0  -6 31.1942 2.34875   3
  13   0  -6 258.920 10.7475   3
 -13   0   6 203.087 9.01943   2
  12   0  -6 21.1858 2.31956   3
 -12   0   6 21.1450 1.98303   2
  11   0  -6 302.557 12.8212   3
 -11   0   6 311.721 12.2452   2
  10   0  -6 187.239 8.37189   3
 -10   0   6 182.135 7.76079   2
   9   0  -6 12.4046 1.48754   4
   9   0  -6 10.1470 1.70603   3
  -9   0   6 11.0129 1.99079   2
   8   0  -6 281.256 10.9948   3
   8   0  -6 240.594 10.2465   4
  -8   0   6 271.938 10.4613   2
   7   0  -6 1003.62 36.8936   4
   6   0  -6 33.1901 4.21052   1
   6   0  -6 25.9792 1.93438   4
   6   0  -6 34.0760 3.12808   5
   5   0  -6 2277.66 90.9350   1
   5   0  -6 2579.64 89.6708   5
   4   0  -6 330.183 16.0580   1
   4   0  -6 394.789 15.4536   5
   3   0  -6 744.085 28.8829   5
   3   0  -6 734.835 29.7256   1
   2   0  -6 28.6735 3.24796   1
   2   0  -6 39.5395 3.31921   5
   1   0  -6 71.3226 5.25124   1
   1   0  -6 76.0223 4.80266   5
   0   0  -6 103.890 5.95046   5
   0   0  -6 94.6784 6.22655   1
  -1   0  -6 3054.00 114.049   5
  -1   0  -6 3108.95 114.777   1
   1   0   6 3122.18 114.273   5
  -2   0  -6 341.378 16.2345   1
  -2   0  -6 378.815 15.8897   5
   2   0   6 355.296 15.8364   5
  -3   0  -6 320.062 15.5618   1
   3   0   6 338.743 15.1823   5
  -4   0  -6 767.905 31.9900   1
   4   0   6 765.438 31.2467   5
  -5   0  -6 640.525 27.3530   1
  -5   0  -6 592.707 22.4747   2
   5   0   6 613.197 25.6965   5
   5   0   6 582.636 23.0373   3
  -6   0  -6 502.914 24.6884   1
  -6   0  -6 488.947 18.9578   2
   6   0   6 515.174 19.3389   3
   6   0   6 516.909 22.2463   5
  -7   0  -6 1013.33 37.5630   2
   7   0   6 1037.03 37.9778   3
   7   0   6 1007.05 40.2094   5
  -8   0  -6 105.507 4.81938   2
   8   0   6 104.567 5.23029   3
  -9   0  -6 3.82824 1.07406   2
   9   0   6 2.65218 1.20806   3
 -10   0  -6 0.89942 1.51554   2
  10   0   6 0.35398 1.10269   3
 -11   0  -6 76.7794 3.96892   2
  11   0   6 75.2679 4.41559   3
  12   0   6 34.7313 2.87244   3
 -13   0  -6 25.4188 1.95667   2
  13   0   6 26.2724 2.28272   3
  14   0   6 6.39870 1.26199   3
  15  -1  -6 15.2153 1.46104   3
  14  -1  -6 2.87511 0.94249   3
  12  -1  -6 74.8070 4.41848   3
  11  -1  -6 1.83217 1.04781   3
 -11   1   6 0.27944 1.25530   2
  10  -1  -6 536.453 20.2946   3
  10  -1  -6 477.277 19.2426   4
 -10   1   6 524.518 19.4848   2
   9  -1  -6 184.077 7.96873   3
   9  -1  -6 166.192 7.28192   4
  -9   1   6 175.006 7.31473   2
   8  -1  -6 -0.0325 0.76362   4
   8  -1  -6 0.71596 0.82719   3
  -8   1   6 1.66185 0.83760   2
   7  -1  -6 250.787 9.78447   4
  -7   1   6 246.814 9.73146   2
   6  -1  -6 77.1311 5.75477   1
   5  -1  -6 265.562 10.8106   4
   5  -1  -6 300.602 13.3977   1
   4  -1  -6 539.537 22.7150   1
   4  -1  -6 550.911 21.5833   5
   3  -1  -6 288.711 12.2858   5
   3  -1  -6 265.330 12.8044   1
   2  -1  -6 807.895 30.9021   5
   2  -1  -6 770.506 31.3840   1
   1  -1  -6 9.77297 2.66769   1
   0  -1  -6 46.7494 4.05353   5
   0   1   6 40.5011 3.96115   5
  -1  -1  -6 160.783 8.99293   1
   1   1   6 156.280 8.67311   5
  -2  -1  -6 1029.00 41.8693   1
   2   1   6 1089.16 42.7316   5
  -3  -1  -6 1813.86 69.6393   1
   3   1   6 1805.47 69.1681   5
  -4  -1  -6 133.850 12.8360   1
  -4  -1  -6 121.359 5.20134   2
   4   1   6 127.277 8.31787   5
  -5  -1  -6 1464.87 61.6760   1
  -5  -1  -6 1443.54 54.7315   2
   5   1   6 1598.40 59.0755   5
  -6  -1  -6 4.78708 5.75781   1
  -6  -1  -6 13.2357 1.43736   2
   6   1   6 10.9377 1.64131   3
   6   1   6 17.5431 4.51254   5
  -7  -1  -6 19.7871 10.7579   1
   7   1   6 20.2231 5.36670   5
  -8  -1  -6 7.65886 1.45157   2
   8   1   6 6.70398 1.37169   3
   8   1   6 6.76686 4.48615   5
  -9  -1  -6 38.8952 2.63004   2
   9   1   6 34.0999 2.87482   3
 -10  -1  -6 297.381 11.8251   2
  10   1   6 290.663 12.1994   3
 -11  -1  -6 3.04426 1.05873   2
  11   1   6 6.35303 1.51773   3
 -12  -1  -6 49.8282 2.91676   2
  12   1   6 44.8123 3.12315   3
 -13  -1  -6 -0.1940 0.72542   2
  13   1   6 0.57048 0.89260   3
 -14  -1  -6 0.35765 0.73777   2
  15  -2  -6 1.45018 0.64867   3
  14  -2  -6 121.091 5.73530   3
  13  -2  -6 1.23811 1.17316   3
  12  -2  -6 139.017 6.81067   3
  11  -2  -6 35.4532 2.91767   3
  10  -2  -6 109.064 5.61375   3
  10  -2  -6 105.702 4.89444   4
   9  -2  -6 71.9126 3.71525   4
   9  -2  -6 79.1664 4.33707   3
   8  -2  -6 13.2348 1.82649   3
   8  -2  -6 12.3657 1.48053   4
   7  -2  -6 615.946 22.8333   4
   7  -2  -6 605.639 23.3200   3
   6  -2  -6 78.4687 3.66578   4
   6  -2  -6 84.1534 5.54036   1
   5  -2  -6 431.641 18.7183   4
   5  -2  -6 528.644 20.4230   1
   4  -2  -6 132.580 7.72301   1
   4  -2  -6 140.430 5.70245   4
   3  -2  -6 14.0316 2.84883   1
   2  -2  -6 1125.24 43.8079   1
   1  -2  -6 2331.51 87.2128   1
  -1   2   6 2320.16 86.9028   5
   0  -2  -6 9999.99 363.611   1
  -1  -2  -6 3403.95 126.548   1
  -2  -2  -6 13.0747 3.28715   1
   2   2   6 12.4209 3.21367   5
  -3  -2  -6 1330.15 54.3276   1
   3   2   6 1437.16 54.6750   5
  -4  -2  -6 1913.85 75.4528   1
   4   2   6 1982.11 75.3821   5
  -5  -2  -6 257.342 14.6280   1
  -5  -2  -6 241.331 9.65466   2
   5   2   6 250.278 13.9229   5
   5   2   6 248.804 9.92965   3
   5   2   6 238.523 9.50855   2
  -6  -2  -6 120.413 5.31617   2
  -6  -2  -6 132.061 12.0884   1
   6   2   6 123.108 5.57195   3
   6   2   6 118.789 5.10108   2
   6   2   6 123.187 9.33386   5
  -7  -2  -6 195.771 8.05231   2
  -7  -2  -6 186.736 16.7527   1
   7   2   6 206.847 12.8670   5
   7   2   6 199.082 8.35440   3
   7   2   6 187.116 7.69328   2
  -8  -2  -6 823.890 30.0104   2
   8   2   6 777.589 34.5435   5
   8   2   6 799.766 30.2638   3
  -9  -2  -6 165.184 7.13850   2
   9   2   6 162.037 7.42119   3
 -10  -2  -6 11.9856 1.85789   2
  10   2   6 13.5003 2.12186   3
 -11  -2  -6 34.6374 2.58263   2
  11   2   6 36.5300 2.88405   3
 -12  -2  -6 19.0224 1.89825   2
  12   2   6 16.4226 2.02150   3
 -13  -2  -6 48.7353 3.03462   2
  13   2   6 40.4787 2.57440   3
  14  -3  -6 58.9618 3.41989   3
  13  -3  -6 350.693 14.3191   3
  12  -3  -6 1.77313 1.06805   3
  11  -3  -6 194.115 8.14466   4
  11  -3  -6 205.022 9.06863   3
  10  -3  -6 117.788 5.35625   4
   9  -3  -6 119.143 5.41181   4
   9  -3  -6 122.210 5.97683   3
   8  -3  -6 433.421 16.7363   3
   8  -3  -6 406.724 16.0415   4
   7  -3  -6 264.821 12.0806   3
   7  -3  -6 238.680 9.81160   4
   6  -3  -6 1808.81 66.9634   1
   5  -3  -6 1660.47 62.5082   1
   4  -3  -6 74.9733 5.47347   1
   3  -3  -6 19.5085 3.48427   1
   3  -3  -6 23.6906 1.52969   4
   2  -3  -6 1023.63 40.4773   1
  -2   3   6 1026.77 40.5218   5
   1  -3  -6 4450.93 158.138   1
  -1   3   6 4113.72 157.874   5
   0  -3  -6 1842.00 70.4210   1
  -1  -3  -6 1653.72 62.7178   1
   1   3   6 1579.88 62.6185   5
  -2  -3  -6 894.871 33.9166   2
  -2  -3  -6  999.99 38.3690   1
   2   3   6 964.084 38.3699   5
   2   3   6 857.139 33.7995   2
  -3  -3  -6 700.390 30.4415   1
  -3  -3  -6 694.475 25.9580   2
   3   3   6 749.648 30.8406   5
   3   3   6 671.429 25.8192   2
  -4  -3  -6 712.749 27.0213   2
  -4  -3  -6 716.965 32.0122   1
   4   3   6 772.430 32.3238   5
   4   3   6 709.967 26.8689   2
   4   3   6 740.831 27.2511   3
  -5  -3  -6 113.903 5.01680   2
  -5  -3  -6 117.557 9.71062   1
   5   3   6 115.936 9.46675   5
   5   3   6 111.688 4.84664   2
   5   3   6 117.168 5.33259   3
  -6  -3  -6 279.823 18.0007   1
  -6  -3  -6 284.521 11.3150   2
   6   3   6 280.127 16.5643   5
   6   3   6 292.177 11.5271   3
   6   3   6 290.845 11.0783   2
  -7  -3  -6 640.963 24.2629   2
  -7  -3  -6 664.667 40.9177   1
   7   3   6 626.756 29.9410   5
   7   3   6 649.489 24.4756   3
  -8  -3  -6 51.5487 3.02997   2
   8   3   6 44.5950 3.23713   3
   8   3   6 44.7885 8.69576   5
  -9  -3  -6 46.7506 3.05262   2
   9   3   6 47.2852 10.9413   5
   9   3   6 50.4550 3.49893   3
 -10  -3  -6 32.5668 2.55106   2
  10   3   6 30.8391 2.67293   3
 -11  -3  -6 1.63128 0.99533   2
  11   3   6 2.07298 1.10925   3
 -12  -3  -6 0.51612 0.81251   2
 -13  -3  -6 4.82332 0.92647   2
  14  -4  -6 37.0684 2.53179   3
  13  -4  -6 56.4705 3.52877   3
  12  -4  -6 20.3027 1.91580   4
  12  -4  -6 24.2173 2.44996   3
  11  -4  -6 238.548 9.86266   3
  11  -4  -6 201.046 8.84706   4
  10  -4  -6 114.163 5.51578   4
  10  -4  -6 123.984 6.09958   3
   9  -4  -6 27.0902 2.51492   3
   9  -4  -6 27.8284 2.16209   4
   8  -4  -6 16.6663 2.07120   3
   8  -4  -6 20.5053 1.80972   4
   7  -4  -6 187.799 8.26647   3
   7  -4  -6 190.237 7.74797   4
   6  -4  -6 473.600 17.8997   4
   5  -4  -6 51.7512 4.42313   1
   5  -4  -6 55.4038 2.73818   4
  -5   4   6 39.6557 7.24244   5
   4  -4  -6 365.901 16.1844   1
   4  -4  -6 357.107 13.6606   4
  -4   4   6 356.909 17.2032   5
   3  -4  -6 135.622 8.11664   1
   3  -4  -6 128.729 5.40627   4
  -3   4   6 132.742 8.86150   5
   2  -4  -6 493.290 20.8464   1
   2  -4  -6 446.746 17.4104   4
  -2   4   6 466.737 21.0298   5
   1  -4  -6 161.357 6.44395   4
   1  -4  -6 150.690 9.24196   1
  -1   4   6 156.813 9.83898   5
   0  -4  -6 256.048 13.1129   1
   0   4   6 227.368 9.25605   2
   0   4   6 253.770 13.3888   5
  -1  -4  -6 174.667 7.40359   2
  -1  -4  -6 202.912 11.3239   1
   1   4   6 195.826 11.6180   5
  -2  -4  -6 461.865 17.5338   2
  -2  -4  -6 471.554 21.9648   1
   2   4   6 459.600 17.4262   2
   2   4   6 482.719 22.4123   5
  -3  -4  -6 986.847 37.8361   2
  -3  -4  -6 1030.85 43.1140   1
   3   4   6 1083.37 43.6837   5
  -4  -4  -6 676.601 24.9161   2
  -4  -4  -6 621.880 30.2384   1
   4   4   6 700.167 31.0070   5
   4   4   6 672.098 24.7586   2
  -5  -4  -6 268.798 18.4561   1
  -5  -4  -6 288.654 11.3059   2
   5   4   6 282.203 11.4043   3
   5   4   6 299.559 11.3902   2
   5   4   6 285.063 17.0230   5
  -6  -4  -6 68.2226 3.50184   2
  -6  -4  -6 60.4195 10.5378   1
   6   4   6 61.9388 8.57196   5
   6   4   6 65.1522 3.69460   3
   6   4   6 65.8688 3.25499   2
  -7  -4  -6 9.70809 9.50071   1
  -7  -4  -6 12.0884 1.72384   2
   7   4   6 10.5638 1.48217   2
   7   4   6 13.5483 5.59319   5
   7   4   6 13.1640 1.85161   3
   8   4   6 123.341 5.84490   3
  -9  -4  -6 276.896 10.6584   2
   9   4   6 244.484 10.5207   3
   9   4   6 243.295 18.0254   5
 -10  -4  -6 1.10426 1.04017   2
 -11  -4  -6 25.5541 2.17679   2
 -12  -4  -6 39.7749 2.49327   2
 -13  -4  -6 3.96684 0.83043   2
  14  -5  -6 5.83802 1.19124   3
  13  -5  -6 11.8565 1.68103   3
  12  -5  -6 -0.9257 1.38370   3
  12  -5  -6 -0.4347 0.71277   4
  11  -5  -6 40.9508 2.67095   4
  11  -5  -6 42.2834 3.15461   3
  10  -5  -6 83.2955 4.72846   3
  10  -5  -6 80.7982 4.15099   4
   9  -5  -6 1.33022 0.88844   4
   9  -5  -6 1.59094 1.02203   3
   8  -5  -6 74.2559 4.20340   3
   8  -5  -6 71.6635 3.70792   4
   7  -5  -6 74.2812 4.14286   3
   7  -5  -6 72.3520 3.64546   4
   6  -5  -6 336.600 13.4993   3
   6  -5  -6 329.044 12.8882   4
   5  -5  -6 51.7871 2.68854   4
   5  -5  -6 38.6508 3.96889   1
  -5   5   6 47.8022 2.50006   2
  -5   5   6 49.9598 9.44074   5
   4  -5  -6 48.4199 4.70210   1
   4  -5  -6 42.6269 2.35346   4
  -4   5   6 35.1497 7.43707   5
  -4   5   6 38.3698 2.21046   2
   3  -5  -6 104.144 7.45841   1
   3  -5  -6 109.342 4.60921   4
  -3   5   6 118.877 9.15074   5
  -3   5   6 102.663 4.45696   2
   2  -5  -6 91.7465 4.03273   4
   2  -5  -6 104.258 7.29804   1
  -2   5   6 78.6446 7.60292   5
   1  -5  -6 179.309 7.05628   4
   1  -5  -6 184.389 10.6858   1
  -1   5   6 178.354 11.3545   5
  -1   5   6 170.895 6.97134   2
   0  -5  -6 159.687 6.51367   4
   0  -5  -6 169.278 10.4495   1
   0   5   6 173.081 11.2931   5
   0   5   6 158.795 6.48101   2
  -1  -5  -6 219.886 8.66813   2
  -1  -5  -6 224.048 12.9032   1
   1   5   6 217.948 8.58295   2
   1   5   6 219.684 13.5024   5
  -2  -5  -6 4.83648 3.66260   1
  -2  -5  -6 4.34635 0.97699   2
   2   5   6 4.29134 3.67156   5
   2   5   6 5.98218 0.98257   2
  -3  -5  -6 11.6992 1.43532   2
  -3  -5  -6 9.67521 4.35565   1
   3   5   6 13.8300 4.77978   5
   3   5   6 9.98010 1.33727   2
  -4  -5  -6 -0.0050 0.79952   2
  -4  -5  -6 0.99564 4.03439   1
   4   5   6 0.52909 3.54270   5
   4   5   6 1.38553 0.80908   2
  -5  -5  -6 45.7850 9.12742   1
  -5  -5  -6 52.6966 3.05851   2
   5   5   6 58.4422 7.94780   5
   5   5   6 57.5077 2.91239   2
  -6  -5  -6 28.0118 2.22992   2
  -6  -5  -6 18.5711 7.57291   1
   6   5   6 28.8873 7.82265   5
   6   5   6 26.9076 1.99886   2
  -7  -5  -6 226.787 9.06914   2
  -7  -5  -6 189.473 22.6393   1
   7   5   6 206.345 16.9996   5
   7   5   6 214.817 8.66645   2
  -8  -5  -6 0.70849 1.04246   2
   8   5   6 -2.5202 6.23438   5
  -9  -5  -6 52.0647 3.19576   2
   9   5   6 28.0399 10.0896   5
 -10  -5  -6 -0.8110 0.83109   2
 -11  -5  -6 44.9687 2.78892   2
 -12  -5  -6 19.8097 1.86626   2
  14  -6  -6 47.1725 2.65216   3
  13  -6  -6 10.7742 1.49990   3
  12  -6  -6 102.331 4.65978   4
  12  -6  -6 105.634 5.27363   3
  11  -6  -6 76.6829 4.29845   3
  11  -6  -6 66.7712 3.65002   4
  10  -6  -6 22.4364 2.39875   3
  10  -6  -6 23.4324 2.08424   4
   9  -6  -6 0.36049 0.83174   4
   9  -6  -6 -0.0440 0.92757   3
   8  -6  -6 42.8499 3.14484   3
   8  -6  -6 42.1384 2.68040   4
   7  -6  -6 1043.56 38.4057   3
   7  -6  -6 999.963 37.8004   4
   6  -6  -6 266.935 11.0001   3
   6  -6  -6 260.959 10.4791   4
   5  -6  -6 27.9867 2.27360   3
   5  -6  -6 25.6723 1.88195   4
  -5   6   6 21.2935 1.81663   2
   4  -6  -6 15.7031 4.09812   1
   4  -6  -6 15.2480 1.46541   4
  -4   6   6 14.1651 1.44633   2
  -4   6   6 17.1362 7.58871   5
   3  -6  -6 274.254 10.4510   4
   3  -6  -6 282.605 14.0707   1
  -3   6   6 263.990 15.9384   5
  -3   6   6 251.637 10.2344   2
   2  -6  -6 845.264 34.7872   1
   2  -6  -6 836.024 30.4639   4
  -2   6   6 850.138 36.2636   5
  -2   6   6 777.529 30.2973   2
   1  -6  -6 18.7063 1.47343   4
   1  -6  -6 19.2668 4.22634   1
  -1   6   6 16.0549 1.39917   2
  -1   6   6 24.2242 5.74101   5
   0  -6  -6 198.483 7.61782   4
   0  -6  -6 190.219 11.9553   1
   0  -6  -6 183.748 7.62278   2
   0   6   6 188.879 12.9168   5
   0   6   6 193.188 7.60697   2
  -1  -6  -6 822.950 30.9629   2
  -1  -6  -6 840.295 30.8888   4
  -1  -6  -6 850.151 36.4733   1
   1   6   6 866.782 37.6886   5
   1   6   6 823.921 30.9254   2
  -2  -6  -6 57.3202 3.00541   2
  -2  -6  -6 61.8396 7.54218   1
   2   6   6 58.6249 2.91274   2
   2   6   6 55.9004 7.85924   5
  -3  -6  -6 73.7271 8.83478   1
  -3  -6  -6 71.9863 3.53044   2
   3   6   6 67.2117 3.38473   2
   3   6   6 72.3425 8.57536   5
  -4  -6  -6 1.57704 0.88696   2
  -4  -6  -6 2.40172 5.14010   1
   4   6   6 3.27234 0.91070   2
   4   6   6 0.30125 4.48058   5
  -5  -6  -6 505.611 19.0169   2
  -5  -6  -6 477.621 26.9421   1
   5   6   6 493.270 26.7854   5
   5   6   6 502.208 18.8178   2
  -6  -6  -6 321.225 12.5609   2
  -6  -6  -6 272.092 21.2902   1
   6   6   6 345.608 28.0054   5
   6   6   6 320.251 12.2877   2
  -7  -6  -6 19.5230 14.3040   1
  -7  -6  -6 19.9733 2.05157   2
   7   6   6 9.39616 6.91315   5
   7   6   6 16.0234 1.78596   2
  -8  -6  -6 257.146 9.96483   2
   8   6   6 194.494 17.8605   5
  -9  -6  -6 67.7766 3.73755   2
 -10  -6  -6 18.9445 1.93145   2
 -11  -6  -6 11.2124 1.48655   2
 -12  -6  -6 16.0233 2.07187   2
  13  -7  -6 24.2549 1.88772   3
  12  -7  -6 0.72613 0.80504   3
  12  -7  -6 0.26002 0.67937   4
  11  -7  -6 0.52624 0.73369   4
  11  -7  -6 0.48649 0.85363   3
  10  -7  -6 26.6773 2.14524   4
  10  -7  -6 30.1987 2.58686   3
   9  -7  -6 11.1693 1.57399   4
   9  -7  -6 11.9285 1.91498   3
   8  -7  -6 33.9423 2.79300   3
   8  -7  -6 33.2710 2.37627   4
   7  -7  -6 127.063 5.78409   4
   7  -7  -6 133.377 6.30839   3
   5  -7  -6 89.9058 4.30392   4
   5  -7  -6 93.5555 5.17421   3
   4  -7  -6 -0.5979 0.96752   3
   4  -7  -6 1.29704 0.78844   4
   4  -7  -6 0.24405 2.97061   1
  -4   7   6 1.80703 0.82975   2
   3  -7  -6 58.7146 3.05881   4
   3  -7  -6 54.4705 6.48581   1
  -3   7   6 59.2765 3.01031   2
  -3   7   6 77.4716 11.6321   5
   2  -7  -6 38.4870 2.29900   4
   2  -7  -6 41.6730 6.01808   1
  -2   7   6 36.9881 9.48372   5
   1  -7  -6 3.37969 3.32843   1
  -1   7   6 7.27677 5.23744   5
   0  -7  -6 135.467 5.71910   4
   0  -7  -6 134.235 10.5294   1
   0   7   6 126.482 17.3439   5
   0   7   6 141.425 5.76937   2
  -1  -7  -6 9.85625 1.50974   2
  -1  -7  -6 3.09711 3.84933   1
  -1  -7  -6 8.01725 1.31809   4
   1   7   6 13.2049 5.40120   5
   1   7   6 7.47467 1.27292   2
  -2  -7  -6 28.9139 2.18853   2
  -2  -7  -6 30.3627 6.85562   1
   2   7   6 19.9404 6.44941   5
   2   7   6 33.1144 2.13564   2
  -3  -7  -6 337.063 12.9871   2
  -3  -7  -6 326.007 19.7331   1
   3   7   6 332.421 12.8959   2
   3   7   6 331.315 20.6046   5
  -4  -7  -6 0.79329 0.90861   2
  -4  -7  -6 -2.4103 5.78784   1
   4   7   6 -1.3951 5.11992   5
   4   7   6 0.07630 0.84523   2
  -5  -7  -6 78.3655 3.97565   2
  -5  -7  -6 52.8650 12.4179   1
   5   7   6 66.5155 3.99148   2
   5   7   6 86.1445 11.9763   5
  -6  -7  -6 247.861 9.80023   2
  -6  -7  -6 183.412 21.1264   1
   6   7   6 244.238 9.57243   2
   6   7   6 234.335 18.1807   5
  -7  -7  -6 12.0995 1.85919   2
   7   7   6 8.91994 1.61306   2
   7   7   6 5.10450 7.01511   5
  -8  -7  -6 -0.2342 0.89120   2
  -9  -7  -6 68.4140 3.67140   2
 -10  -7  -6 12.6899 1.58803   2
 -11  -7  -6 36.1879 2.15749   2
  12  -8  -6 8.25874 1.17597   4
  12  -8  -6 10.2843 1.43142   3
  11  -8  -6 0.99327 0.83473   3
  11  -8  -6 1.26173 0.78434   4
  10  -8  -6 120.790 5.80612   3
   9  -8  -6 80.1139 4.57550   3
   9  -8  -6 90.1366 4.28868   4
   8  -8  -6 358.444 14.8305   3
   8  -8  -6 378.730 14.4801   4
   7  -8  -6 23.7902 2.02903   4
   7  -8  -6 21.3756 2.39150   3
   6  -8  -6 42.5605 3.28935   4
   6  -8  -6 39.5929 3.02873   3
   5  -8  -6 44.4160 2.70365   4
  -5   8   6 47.0113 2.67392   2
   4  -8  -6 0.11496 3.70889   1
   4  -8  -6 2.40594 0.82912   4
  -4   8   6 0.86999 0.85456   2
   3  -8  -6 99.7273 8.92153   1
   3  -8  -6 112.833 4.95060   4
  -3   8   6 109.531 4.75877   2
   2  -8  -6 1.12277 3.84331   1
  -2   8   6 -0.9654 8.48431   5
   1  -8  -6 42.1199 6.96083   1
   1  -8  -6 44.1476 2.50657   4
  -1   8   6 42.4183 2.49050   2
  -1   8   6 46.0671 11.0385   5
   0  -8  -6 96.3794 4.36308   4
   0  -8  -6 98.9012 13.6453   1
   0   8   6 95.6560 4.37685   2
   0   8   6 88.9690 12.0739   5
  -1  -8  -6 0.51269 0.84542   4
  -1  -8  -6 -2.0398 4.53358   1
   1   8   6 0.22535 5.63528   5
   1   8   6 -0.1191 0.77120   2
  -2  -8  -6 112.201 11.8257   1
  -2  -8  -6 124.538 5.42826   2
   2   8   6 127.356 13.5120   5
   2   8   6 123.303 5.43704   2
  -3  -8  -6 2.50974 0.99937   2
  -3  -8  -6 0.17341 5.81379   1
   3   8   6 11.7507 8.10682   5
   3   8   6 3.26419 1.00488   2
  -4  -8  -6 9.76381 7.47556   1
   4   8   6 22.3795 1.92565   2
   4   8   6 21.2340 7.80429   5
  -5  -8  -6 80.6781 4.09436   2
  -5  -8  -6 66.1341 15.8449   1
   5   8   6 68.5016 12.0396   5
   5   8   6 82.6770 4.01534   2
  -6  -8  -6 106.059 5.05029   2
   6   8   6 106.068 4.88674   2
  -7  -8  -6 31.3262 2.40412   2
   7   8   6 30.3033 2.22660   2
  -8  -8  -6 51.7682 3.02217   2
  -9  -8  -6 -1.5263 0.66421   2
 -10  -8  -6 26.3427 1.81720   2
  12  -9  -6 49.6888 2.57745   4
  11  -9  -6 3.70346 0.82317   4
  10  -9  -6 9.23903 1.44727   4
   9  -9  -6 1.42173 1.13574   4
   8  -9  -6 316.137 12.5361   4
   7  -9  -6 423.786 16.4194   4
   6  -9  -6 23.8890 2.06272   4
   4  -9  -6 93.8578 4.61037   4
  -4   9   6 102.050 4.76464   2
   3  -9  -6 1.67046 1.47018   4
   3  -9  -6 -2.2241 5.07116   1
  -3   9   6 1.85759 0.82281   2
   2  -9  -6 42.8212 8.40264   1
   2  -9  -6 32.8397 2.23235   4
  -2   9   6 46.2675 12.8269   5
  -2   9   6 34.3040 2.23855   2
   1  -9  -6 23.8829 1.86054   4
   1  -9  -6 18.7713 6.01812   1
  -1   9   6 23.8121 1.91042   2
  -1   9   6 23.2463 10.3629   5
   0  -9  -6 734.670 26.7812   4
   0  -9  -6 674.251 33.4527   1
   0   9   6 692.881 36.9206   5
   0   9   6 753.292 27.4565   2
  -1  -9  -6 49.1369 10.0956   1
   1   9   6 53.0391 2.98165   2
   1   9   6 53.4265 12.5361   5
  -2  -9  -6 192.744 16.6035   1
   2   9   6 188.413 17.6626   5
   2   9   6 229.406 8.79246   2
  -3  -9  -6 64.0421 13.0896   1
  -3  -9  -6 64.4758 3.55085   2
   3   9   6 68.5450 13.5098   5
   3   9   6 76.8735 3.73506   2
  -4  -9  -6 66.4142 3.56481   2
   4   9   6 67.2380 13.7588   5
   4   9   6 72.1375 3.67327   2
  -5  -9  -6 138.622 6.11788   2
   5   9   6 148.627 6.19787   2
   5   9   6 113.537 15.6822   5
  -6  -9  -6 0.67716 1.57616   2
   6   9   6 0.74391 0.96701   2
  -7  -9  -6 163.122 7.16671   2
   7   9   6 182.744 7.08269   2
  -8  -9  -6 86.8560 3.93595   2
   8   9   6 81.5433 3.79526   2
  -9  -9  -6 6.19839 1.12681   2
  11 -10  -6 1.83592 0.66264   4
  10 -10  -6 2.32808 0.71146   4
   9 -10  -6 3.36406 0.92559   4
   8 -10  -6 9.81211 1.41043   4
   7 -10  -6 46.9900 2.79010   4
   6 -10  -6 140.484 6.18855   4
   5 -10  -6 2.03220 0.82343   4
  -5  10   6 1.58938 0.90962   2
   4 -10  -6 1.40942 0.82324   4
  -4  10   6 0.75316 0.89348   2
   3 -10  -6 58.2841 3.19291   4
  -3  10   6 59.7394 3.15515   2
   2 -10  -6 13.7302 6.86720   1
   2 -10  -6 11.6132 1.52235   4
  -2  10   6 11.3399 1.57815   2
   1 -10  -6 170.023 7.16887   4
   1 -10  -6 159.911 14.5459   1
  -1  10   6 149.227 24.0230   5
  -1  10   6 183.256 7.28859   2
   0 -10  -6 0.64439 0.82710   4
   0 -10  -6 0.00071 7.10217   1
   0  10   6 0.61553 0.87925   2
   0  10   6 14.0948 13.1387   5
   1  10   6 18.7516 1.91106   2
   1  10   6 21.0927 12.7496   5
   2  10   6 9.99222 13.9764   5
   2  10   6 26.0736 2.15487   2
   3  10   6 96.7641 4.57651   2
   3  10   6 78.5181 19.5495   5
   4  10   6 52.6425 3.02902   2
   5  10   6 53.8052 3.17965   2
   6  10   6 8.55811 1.45036   2
  -7 -10  -6 -1.2345 0.87796   2
  10 -11  -6 17.0890 1.36110   4
   9 -11  -6 137.625 5.82111   4
   8 -11  -6 33.8871 2.21485   4
   7 -11  -6 4.53837 1.01104   4
   6 -11  -6 3.83133 0.92166   4
   5 -11  -6 0.64952 1.17259   4
   4 -11  -6 124.905 5.54911   4
   3 -11  -6 1.47598 0.77990   4
  -3  11   6 0.77220 0.81573   2
   2 -11  -6 226.670 9.13186   4
  -2  11   6 227.709 9.14423   2
   1 -11  -6 73.7124 3.96718   4
  -1  11   6 80.3264 3.84596   2
   0  11   6 1.43914 0.92338   2
   1  11   6 -0.1799 0.81876   2
   2  11   6 3.05952 1.00504   2
   3  11   6 34.2207 2.34236   2
   4  11   6 10.1754 1.49525   2
   5  11   6 29.4291 1.97173   2
   6  11   6 0.70694 0.62874   2
   8 -12  -6 13.3916 1.25757   4
   7 -12  -6 2.07033 0.67279   4
   6 -12  -6 36.8119 2.26125   4
   5 -12  -6 22.1476 1.75227   4
   4 -12  -6 -0.1784 0.58996   4
  -4  12   6 0.02831 0.67934   2
   3 -12  -6 4.13941 0.90129   4
  -3  12   6 5.34548 0.92993   2
   2 -12  -6 28.2995 1.96734   4
  -2  12   6 31.2493 2.11448   2
  -1  12   6 88.5834 4.12343   2
   0  12   6 20.8741 1.83429   2
   1  12   6 77.6300 3.78553   2
   2  12   6 99.1300 4.52597   2
   3  12   6 21.5022 1.74357   2
   4  12   6 8.06186 1.51514   2
   5  12   6 1.15736 0.52983   2
   6 -13  -6 1.67438 0.55433   4
   5 -13  -6 2.05352 0.65565   4
   4 -13  -6 1.07693 0.59780   4
   3 -13  -6 10.2230 1.39583   4
  -2  13   6 51.5784 2.58714   2
  -1  13   6 33.1501 2.96572   2
   0  13   6 17.8634 1.80656   2
   1  13   6 33.3342 2.72924   2
   2  13   6 1.30829 0.61998   2
   3  15  -7 17.0934 1.33266   2
   2  15  -7 48.5471 2.57137   2
   0  15  -7 0.73740 0.73710   2
  -1  15  -7 3.50646 0.91298   2
   1 -15   7 3.15669 0.70458   4
  -2  15  -7 0.17355 0.61311   2
   2 -15   7 0.45931 0.53991   4
  -3  15  -7 92.5541 4.30490   2
   3 -15   7 110.865 4.53402   4
   4 -15   7 14.3056 1.29111   4
   5 -15   7 69.2386 3.26577   4
   5  14  -7 9.03779 1.17469   2
   4  14  -7 22.3676 1.68723   2
   3  14  -7 452.738 17.1405   2
   2  14  -7 62.2056 3.17151   2
   1  14  -7 98.5737 4.50807   2
   0  14  -7 242.127 9.28066   2
   0 -14   7 219.385 9.13146   4
  -1  14  -7 1.33333 0.87478   2
   1 -14   7 2.36907 0.80080   4
  -2  14  -7 5.56704 1.02169   2
   2 -14   7 7.34149 1.27704   4
  -3  14  -7 22.7396 1.78874   2
   3 -14   7 24.7100 1.93887   4
  -4  14  -7 38.2581 2.66185   2
   4 -14   7 28.7068 2.12380   4
   5 -14   7 110.268 5.01573   4
   6 -14   7 9.19827 1.27256   4
   7 -14   7 63.8772 3.48910   4
   6  13  -7 27.5729 1.85982   2
   5  13  -7 73.3046 3.54858   2
   4  13  -7 12.4370 1.59741   2
   2  13  -7 35.1829 2.42303   2
  -2 -13   7 30.8811 2.07308   4
   1  13  -7 67.8608 3.58857   2
   0  13  -7 131.448 5.78692   2
   0 -13   7 130.429 5.81264   4
  -1  13  -7 5.26852 1.06766   2
   1 -13   7 4.22486 0.98457   4
  -2  13  -7 90.0147 4.30757   2
   2 -13   7 93.8739 4.59119   4
   3 -13   7 109.113 5.21445   4
  -4  13  -7 0.79944 0.80962   2
   4 -13   7 1.93784 0.87245   4
   5 -13   7 145.468 6.84042   4
   6 -13   7 0.60409 0.71135   4
   7 -13   7 123.584 5.52113   4
   8 -13   7 61.1234 3.11696   4
   9 -13   7 23.0421 1.56495   4
   7  12  -7 0.80303 0.71738   2
  -7 -12   7 -1.1193 0.98183   2
   6  12  -7 -0.0396 0.74872   2
  -6 -12   7 1.11632 1.64835   2
   5  12  -7 0.03925 0.95563   2
   4  12  -7 129.896 5.80503   2
   3  12  -7 94.7047 15.1426   5
   3  12  -7 107.102 4.96974   2
   2  12  -7 26.6451 11.8043   5
   2  12  -7 11.9777 1.65162   2
  -2 -12   7 9.82997 1.46763   4
   1  12  -7 7.71939 9.16790   5
   1  12  -7 13.1039 1.78299   2
  -1 -12   7 16.2161 1.66792   4
   0  12  -7 2.18702 0.90566   2
   0  12  -7 22.6562 11.3119   5
   0 -12   7 1.05764 0.81475   4
   0 -12   7 3.02643 7.55767   1
   1 -12   7 7.27594 7.12068   1
  -2  12  -7 5.77381 1.11371   2
   2 -12   7 7.36428 1.39634   4
   2 -12   7 -1.8095 8.73246   1
  -3  12  -7 7.35814 1.46090   2
   3 -12   7 10.8292 1.70060   4
  -4  12  -7 42.4620 2.61023   2
   4 -12   7 48.9857 3.07185   4
  -5  12  -7 34.5108 2.33953   2
   5 -12   7 38.4524 2.66157   4
   6 -12   7 31.4523 2.39317   4
   7 -12   7 0.01273 1.15680   4
   8 -12   7 0.05003 0.67722   4
   9 -12   7 5.01006 0.93547   4
  10 -12   7 321.554 12.2400   4
  -9 -11   7 283.992 11.3884   2
  -8 -11   7 136.018 5.90499   2
   7  11  -7 57.8553 3.14726   2
  -7 -11   7 62.9716 3.38968   2
   6  11  -7 152.064 6.38145   2
  -6 -11   7 144.304 6.51206   2
   5  11  -7 24.4151 10.5597   5
   5  11  -7 47.2401 2.81734   2
  -5 -11   7 40.9812 2.83229   2
   4  11  -7 120.506 14.0992   5
   4  11  -7 128.616 5.78459   2
  -4 -11   7 130.315 5.82223   2
   3  11  -7 23.4379 2.04567   2
   3  11  -7 19.6363 7.44479   5
  -3 -11   7 22.2461 1.85369   4
  -3 -11   7 9.87534 9.55450   1
   2  11  -7 105.818 4.88776   2
   2  11  -7 97.2938 12.6889   5
  -2 -11   7 94.0817 13.2295   1
  -2 -11   7 103.411 4.84441   4
   1  11  -7 129.128 6.06863   2
   1  11  -7 134.003 15.1770   5
  -1 -11   7 127.277 13.5143   1
   0  11  -7 8.14626 2.20646   2
   0  11  -7 -7.7492 7.96494   5
   0 -11   7 8.87271 2.37615   4
   0 -11   7 9.39558 5.89894   1
  -1  11  -7 1.26553 8.16535   5
  -1  11  -7 5.27405 1.14523   2
   1 -11   7 5.64461 5.55980   1
   1 -11   7 7.35530 2.11043   4
  -2  11  -7 83.2266 4.27823   2
   2 -11   7 79.1872 9.83011   1
   2 -11   7 95.3344 5.66983   4
   3 -11   7 1140.48 46.1359   1
   3 -11   7 1218.14 43.9673   4
  -4  11  -7 947.353 34.9274   2
   4 -11   7 937.565 35.3890   4
  -5  11  -7 0.21120 0.87969   2
   5 -11   7 1.92630 1.00918   4
   6 -11   7 102.889 5.06589   4
   7 -11   7 6.09180 1.26573   4
   8 -11   7 16.3056 1.72826   4
   9 -11   7 21.3976 1.81628   4
  10 -11   7 46.5101 3.14093   4
 -10 -10   7 41.0328 2.44019   2
  -9 -10   7 -0.0811 0.74597   2
   8  10  -7 103.641 4.45255   2
  -8 -10   7 88.6242 5.34546   2
   7  10  -7 -0.0263 7.33242   5
   7  10  -7 1.50276 0.88464   2
  -7 -10   7 1.71105 1.02273   2
   6  10  -7 61.1762 11.3860   5
   6  10  -7 64.3361 3.40258   2
  -6 -10   7 59.5601 3.53063   2
   5  10  -7 -1.4979 5.95666   5
   5  10  -7 8.89204 1.54225   2
  -5 -10   7 5.66268 1.20859   2
  -5 -10   7 1.35885 14.3252   1
   4  10  -7 79.5477 4.29447   2
   4  10  -7 92.0341 11.2538   5
  -4 -10   7 79.3606 3.91353   4
  -4 -10   7 78.8281 4.33227   2
  -4 -10   7 79.0362 13.7514   1
   3  10  -7 72.7188 3.76382   2
   3  10  -7 64.3759 9.78463   5
  -3 -10   7 72.8322 3.79923   2
  -3 -10   7 70.5274 3.68161   4
  -3 -10   7 70.7821 11.7667   1
   2  10  -7 183.803 7.58149   2
   2  10  -7 181.750 14.2280   5
  -2 -10   7 184.881 15.0135   1
  -2 -10   7 168.563 7.43132   2
   1  10  -7 704.867 33.8007   5
   1  10  -7 751.169 27.2951   2
  -1 -10   7 717.330 34.7856   1
   0  10  -7 84.6763 4.09959   2
   0  10  -7 79.5232 10.6344   5
  -1  10  -7 229.266 16.4214   5
  -1  10  -7 226.925 9.23011   2
  -2  10  -7 268.756 11.0100   2
  -2  10  -7 303.814 18.9103   5
   2 -10   7 278.172 11.4000   4
  -3  10  -7 19.3665 1.75548   2
   3 -10   7 22.7969 2.19965   4
  -4  10  -7 8.13516 1.27012   2
   4 -10   7 9.36462 1.76345   4
  -5  10  -7 149.461 6.34537   2
   6 -10   7 100.101 5.03403   4
   7 -10   7 7.72027 1.56695   4
   8 -10   7 11.9606 2.38577   3
   8 -10   7 16.8815 1.79623   4
   9 -10   7 127.420 5.97596   3
  10 -10   7 -3.5938 1.50226   3
  10 -10   7 0.31054 0.63956   4
 -11  -9   7 1.44179 0.72187   2
 -10  -9   7 57.8282 3.25470   2
  -9  -9   7 32.4696 2.64403   2
   8   9  -7 54.6558 11.0533   5
   8   9  -7 70.2026 3.49206   2
  -8  -9   7 72.9019 3.89112   2
   7   9  -7 43.5929 2.69756   2
   7   9  -7 44.1820 9.31219   5
  -7  -9   7 46.7794 3.01200   2
   6   9  -7 5.02403 5.19479   5
   6   9  -7 2.85933 1.01801   2
  -6  -9   7 17.2498 11.4261   1
  -6  -9   7 1.58615 0.98075   2
   5   9  -7 7.94975 5.53431   5
   5   9  -7 7.69196 1.50506   2
  -5  -9   7 5.56461 1.23075   2
  -5  -9   7 6.85587 8.59624   1
   4   9  -7 -1.7143 4.11078   5
   4   9  -7 0.02827 0.90014   2
  -4  -9   7 1.22069 0.97665   2
  -4  -9   7 0.85198 10.2755   1
   3   9  -7 206.716 8.46673   2
   3   9  -7 200.964 14.1344   5
  -3  -9   7 210.385 15.9519   1
  -3  -9   7 200.469 8.44641   2
   2   9  -7 66.2115 3.52476   2
   2   9  -7 65.0450 8.79377   5
  -2  -9   7 74.8228 3.80125   2
  -2  -9   7 67.4268 9.17830   1
   1   9  -7 9.84781 4.89120   5
   1   9  -7 18.7208 1.70693   2
  -1  -9   7 19.3872 1.92812   2
  -1  -9   7 21.5761 5.84833   1
   0   9  -7 163.317 16.1776   5
   0   9  -7 140.260 6.03512   2
   0  -9   7 132.510 11.1462   1
  -1   9  -7 4.13851 5.06610   5
  -1   9  -7 6.62335 1.09338   2
   1  -9   7 4.64701 3.97741   1
  -2   9  -7 95.1019 10.2736   5
  -2   9  -7 84.3614 3.98014   2
   2  -9   7 79.3617 7.94468   1
  -3   9  -7 58.5027 3.00534   2
  -3   9  -7 55.3291 10.7019   5
   3  -9   7 52.5065 6.65369   1
  -4   9  -7 815.028 30.6366   2
   4  -9   7 862.748 31.1321   4
   4  -9   7 800.584 32.4380   1
  -5   9  -7 22.8032 2.00532   2
   5  -9   7 23.6017 2.21923   4
   6  -9   7 104.286 4.99085   4
   6  -9   7 93.2144 4.98425   3
   7  -9   7 246.814 9.50617   4
   7  -9   7 195.599 10.3673   3
   8  -9   7 7.86123 1.51387   4
   8  -9   7 3.35996 1.29786   3
   9  -9   7 70.0747 3.63925   4
   9  -9   7 68.1225 4.06666   3
  10  -9   7 42.1505 2.54392   4
  10  -9   7 45.8582 3.11739   3
  11  -9   7 74.7213 4.08152   3
  12  -9   7 17.4291 1.88645   3
 -12  -8   7 20.0786 1.67330   2
 -11  -8   7 3.10630 0.95948   2
  -9  -8   7 330.308 13.2516   2
   8   8  -7 -3.9257 5.06339   5
   8   8  -7 -0.5979 0.81934   2
  -8  -8   7 -0.8994 0.85993   2
   7   8  -7 320.375 19.2279   5
  -7  -8   7 289.287 26.3605   1
  -7  -8   7 361.938 13.5084   2
   6   8  -7 466.767 24.6259   5
   6   8  -7 481.191 18.3613   2
  -6  -8   7 472.668 18.6381   2
  -6  -8   7 529.896 32.5141   1
   5   8  -7 398.916 15.3309   2
   5   8  -7 406.561 21.4261   5
  -5  -8   7 383.033 23.9238   1
  -5  -8   7 398.173 15.5280   2
   4   8  -7 -1.4458 3.86865   5
   4   8  -7 -0.5410 0.76824   2
  -4  -8   7 -0.7854 5.39827   1
  -4  -8   7 -0.8475 0.75275   2
   3   8  -7 645.768 30.2014   5
   3   8  -7 629.671 24.5889   2
  -3  -8   7 701.402 25.0349   2
  -3  -8   7 649.142 31.5670   1
   2   8  -7 609.690 33.9932   5
   2   8  -7 596.045 22.2946   2
  -2  -8   7 591.793 28.7450   1
  -2  -8   7 584.012 22.2780   2
   1   8  -7 37.1708 2.22011   2
   1   8  -7 47.8794 6.80328   5
  -1  -8   7 31.0312 2.14487   2
  -1  -8   7 33.5507 6.04816   1
   0   8  -7 207.922 13.1246   5
   0   8  -7 220.229 8.67893   2
   0  -8   7 218.925 13.4667   1
  -1   8  -7 711.012 26.6673   2
  -1   8  -7 725.953 31.4285   5
  -2   8  -7 1068.64 39.6323   2
  -2   8  -7 1083.61 44.1647   5
   2  -8   7 1083.57 44.0966   1
  -3   8  -7 1293.43 52.7514   5
  -3   8  -7 1321.34 55.2765   2
   3  -8   7 1358.96 52.3623   1
  -4   8  -7 30.9405 6.74311   5
  -4   8  -7 27.5797 1.95830   2
   4  -8   7 35.1685 4.67883   1
   4  -8   7 20.7505 2.38415   3
  -5   8  -7 1343.90 50.0920   2
   5  -8   7 1412.23 50.5602   4
   5  -8   7 1350.48 50.4524   3
   6  -8   7 478.714 18.2458   4
   6  -8   7 461.900 18.2369   3
   7  -8   7 173.650 7.54023   4
   7  -8   7 173.898 7.72845   3
   8  -8   7 80.8346 4.11599   4
   8  -8   7 79.1026 4.43708   3
   9  -8   7 369.735 14.5474   4
   9  -8   7 376.260 15.0347   3
  10  -8   7 220.579 9.07822   4
  10  -8   7 213.654 9.39789   3
  11  -8   7 85.4373 4.58388   3
  12  -8   7 51.5164 3.23604   3
  13  -8   7 3.89951 0.98085   3
 -13  -7   7 35.6104 2.08913   2
 -12  -7   7 4.20759 0.97886   2
 -11  -7   7 0.56008 0.87646   2
 -10  -7   7 12.9147 1.79528   2
   9   7  -7 13.0636 6.35378   5
  -9  -7   7 10.6558 1.75795   2
   8   7  -7 14.9164 5.64414   5
  -8  -7   7 13.8813 1.92892   2
   7   7  -7 250.637 15.6983   5
   7   7  -7 260.016 10.3964   2
  -7  -7   7 264.566 10.7841   2
  -7  -7   7 282.613 23.2244   1
   6   7  -7 3.29229 3.88068   5
  -6  -7   7 5.02808 7.45330   1
   5   7  -7 266.670 10.4896   2
   5   7  -7 256.259 15.5080   5
  -5  -7   7 260.121 18.2579   1
  -5  -7   7 272.426 10.7261   2
   4   7  -7 11.8525 3.86074   5
   4   7  -7 17.2883 1.58369   2
  -4  -7   7 15.7591 5.65688   1
   3   7  -7 381.359 14.4618   2
   3   7  -7 374.038 18.9774   5
  -3  -7   7 372.991 14.5064   2
  -3  -7   7 379.980 20.5307   1
   2   7  -7 42.5870 5.98558   5
   2   7  -7 39.0619 2.30248   2
  -2  -7   7 38.9942 2.34435   2
   1   7  -7 507.097 19.1476   2
   1   7  -7 509.788 25.1817   1
   1   7  -7 513.004 23.3914   5
   0   7  -7 302.054 15.3934   5
   0   7  -7 284.704 11.4179   2
   0   7  -7 310.754 19.4613   1
  -1   7  -7 161.963 6.70631   2
  -1   7  -7 177.933 13.1468   1
  -1   7  -7 161.349 10.2918   5
  -2   7  -7 192.685 7.80448   2
  -2   7  -7 187.378 15.1285   1
  -2   7  -7 207.182 11.6122   5
  -3   7  -7 430.727 16.2903   2
  -3   7  -7 445.194 20.1234   5
   3  -7   7 419.654 16.4917   3
  -4   7  -7 145.169 5.93436   2
  -4   7  -7 134.203 10.3118   5
   4  -7   7 143.801 6.26251   3
   4  -7   7 127.457 16.2549   1
  -5   7  -7 87.3162 4.09231   2
   5  -7   7 85.0889 4.36516   3
   5  -7   7 86.1685 6.38593   1
   5  -7   7 90.0473 5.34342   1
   6  -7   7 550.836 21.4773   3
   6  -7   7 571.309 21.4094   4
   7  -7   7 209.736 8.78204   4
   7  -7   7 211.664 9.04921   3
   8  -7   7 106.353 5.40050   3
   8  -7   7 106.468 4.98938   4
   9  -7   7 47.4079 3.44695   3
   9  -7   7 53.8647 2.95952   4
  10  -7   7 153.942 6.95676   3
  10  -7   7 135.962 6.05411   4
  11  -7   7 5.92327 1.39745   3
  12  -7   7 0.05759 0.87400   3
 -13  -6   7 70.2280 3.75128   2
 -12  -6   7 31.3518 2.32168   2
 -11  -6   7 56.4555 3.35109   2
 -10  -6   7 0.51422 0.87973   2
   9   6  -7 2.39540 5.63449   5
   8   6  -7 637.852 24.2698   2
   8   6  -7 632.948 29.4837   5
  -8  -6   7 685.292 24.9131   2
   7   6  -7 110.977 4.90315   2
   7   6  -7 113.827 9.42020   5
  -7  -6   7 124.524 15.3136   1
  -7  -6   7 106.459 5.21435   2
   6   6  -7 1130.79 47.3746   5
   6   6  -7 1148.34 42.1765   2
  -6  -6   7 1150.26 51.0359   1
  -6  -6   7 1160.73 42.4721   2
   5   6  -7 1235.30 46.1955   2
   5   6  -7 1228.60 50.9685   5
  -5  -6   7 1340.74 63.5978   1
   4   6  -7 664.366 25.0463   2
   4   6  -7 692.075 29.6026   5
  -4  -6   7 666.894 25.1716   2
   3   6  -7 106.295 7.83141   5
   3   6  -7 81.8666 8.80985   1
   3   6  -7 95.3824 4.19885   2
  -3  -6   7 90.2852 4.23482   2
   2   6  -7 18.0808 4.23994   5
   2   6  -7 17.7855 4.82846   1
   2   6  -7 21.6252 1.63969   2
  -2  -6   7 21.6928 1.65933   2
   1   6  -7 419.984 19.2095   5
   1   6  -7 411.496 15.6529   2
   1   6  -7 429.081 20.6801   1
  -1  -6   7 403.626 15.6525   2
   0   6  -7 641.761 27.4578   5
   0   6  -7 659.890 24.2038   2
   0   6  -7 643.161 28.8341   1
  -1   6  -7 289.775 11.5929   2
  -1   6  -7 340.799 16.8851   1
  -1   6  -7 290.367 14.6601   5
  -2   6  -7 523.102 20.8222   2
  -2   6  -7 598.554 25.3951   5
  -2   6  -7 571.423 25.8164   1
  -3   6  -7 443.377 16.6459   2
  -3   6  -7 450.584 19.8103   5
  -3   6  -7 437.683 22.2715   1
   3  -6   7 434.758 16.8880   3
   3  -6   7 444.127 16.4845   5
  -4   6  -7 241.217 12.5893   5
  -4   6  -7 225.396 9.09385   2
   4  -6   7 224.857 9.38903   3
   4  -6   7 243.656 13.8659   1
  -5   6  -7 95.6888 9.08986   5
  -5   6  -7 99.1751 4.43710   2
   5  -6   7 97.9923 4.73382   3
   5  -6   7 99.5015 8.14465   1
  -6   6  -7 5.45519 1.27446   2
   6  -6   7 5.24729 2.13201   3
   7  -6   7 147.713 6.35262   4
   7  -6   7 143.702 6.66997   3
   8  -6   7 130.427 6.20820   3
   8  -6   7 124.882 5.64843   4
   9  -6   7 507.820 19.7189   4
   9  -6   7 537.430 20.7947   3
  10  -6   7 142.863 6.89311   3
  11  -6   7 3.98009 1.39560   3
  12  -6   7 3.12602 1.25263   3
  13  -6   7 8.49858 1.62215   3
 -13  -5   7 0.99306 0.76251   2
 -12  -5   7 8.57871 1.54225   2
 -11  -5   7 60.7962 3.53207   2
  10   5  -7 115.587 5.37093   3
 -10  -5   7 106.543 5.36724   2
   9   5  -7 348.888 13.7239   3
   9   5  -7 337.936 17.7643   5
   8   5  -7 725.600 31.6719   5
   8   5  -7 703.063 26.9469   2
   8   5  -7 716.892 27.4805   3
  -8  -5   7 774.940 27.6080   2
   7   5  -7 91.8308 4.46020   3
   7   5  -7 86.1084 7.89406   5
   7   5  -7 88.0029 4.21440   2
  -7  -5   7 92.2279 16.8243   1
  -7  -5   7 98.2661 4.50624   2
   6   5  -7 101.310 8.19592   5
   6   5  -7 108.432 4.96219   3
   6   5  -7 105.530 4.69683   2
  -6  -5   7 114.065 5.02366   2
  -6  -5   7 116.567 12.1619   1
   5   5  -7 68.1661 6.54702   5
   5   5  -7 68.5376 3.26238   2
  -5  -5   7 65.7097 3.42413   2
   4   5  -7 508.916 24.0445   1
   4   5  -7 487.065 18.4229   2
   4   5  -7 494.754 22.2445   5
  -4  -5   7 480.324 18.5590   2
   3   5  -7 5411.14 199.442   5
   3   5  -7 5422.99 201.132   1
   2   5  -7 414.707 20.4413   1
   2   5  -7 415.276 16.0324   2
   2   5  -7 454.616 19.5083   5
  -2  -5   7 425.120 16.1047   2
   1   5  -7 1517.85 60.4096   1
   1   5  -7 1552.29 59.2062   5
   0   5  -7 312.879 14.7487   5
   0   5  -7 309.558 15.8249   1
  -1   5  -7 110.396 7.16598   5
  -1   5  -7 110.156 8.34210   1
  -2   5  -7 38.3176 4.53202   5
  -2   5  -7 47.1057 6.38937   1
  -3   5  -7 1.94521 2.66783   5
  -3   5  -7 -0.1317 4.75333   1
   3  -5   7 4.12696 1.85887   3
   3  -5   7 10.0533 5.66684   1
  -4   5  -7 698.856 28.9949   5
   4  -5   7 701.427 30.0154   1
   4  -5   7 716.595 26.4492   3
  -5   5  -7 1132.17 44.0978   2
  -5   5  -7 1232.92 47.2612   5
   5  -5   7 1216.70 44.2909   3
   5  -5   7 1218.59 47.2531   1
  -6   5  -7 76.2878 9.45933   5
   6  -5   7 74.6848 3.89537   3
   6  -5   7 68.9214 8.90151   1
  -7   5  -7 4.88764 1.25420   2
   7  -5   7 3.51564 0.96315   4
   7  -5   7 2.33226 1.03748   3
   8  -5   7 88.4661 4.77368   3
   8  -5   7 89.7406 4.18599   4
   9  -5   7 871.014 33.0625   3
  10  -5   7 227.894 9.99263   3
  11  -5   7 139.368 6.76434   3
  12  -5   7 639.322 25.3524   3
  13  -5   7 2.22128 1.09981   3
  14  -5   7 0.14554 0.66082   3
 -14  -4   7 40.8523 2.31830   2
 -13  -4   7 1.46512 0.80241   2
  12   4  -7 1.40162 0.78220   3
 -12  -4   7 0.90131 1.04187   2
  11   4  -7 2.98981 1.06332   3
 -11  -4   7 1.14667 0.97566   2
  10   4  -7 96.5050 5.07498   3
 -10  -4   7 111.824 5.17412   2
   9   4  -7 440.467 17.4829   3
   9   4  -7 444.012 20.5283   5
  -9  -4   7 459.330 17.4474   2
   8   4  -7 16.4408 1.81711   3
   8   4  -7 18.8262 4.52812   5
  -8  -4   7 18.2246 1.84075   2
   7   4  -7 44.4163 2.54662   2
   7   4  -7 52.0506 6.01675   5
   7   4  -7 49.6356 2.93692   3
  -7  -4   7 51.4073 2.90434   2
  -7  -4   7 48.5462 11.7880   1
   6   4  -7 213.699 11.8859   5
   6   4  -7 211.558 8.41158   2
  -6  -4   7 217.248 8.71854   2
   5   4  -7 333.637 18.0120   1
   5   4  -7 325.479 12.7106   2
   5   4  -7 344.104 16.2020   5
  -5  -4   7 335.084 12.9241   2
   4   4  -7 317.862 12.5835   2
   4   4  -7 324.202 17.2313   1
   4   4  -7 354.788 16.0184   5
  -4  -4   7 333.187 12.7568   2
   3   4  -7 1.33376 2.61809   1
   3   4  -7 4.16404 2.11051   5
   3   4  -7 3.33254 0.75951   2
  -3  -4   7 3.33336 0.84206   2
   2   4  -7 3089.82 113.191   1
   2   4  -7 2916.69 111.557   5
   1   4  -7 254.442 12.3050   5
   0   4  -7 158.807 9.70000   1
   0   4  -7 159.483 8.63064   5
  -1   4  -7 985.197 37.9959   5
  -1   4  -7 952.694 39.0851   1
  -2   4  -7 282.475 14.5496   1
  -2   4  -7 297.575 13.5198   5
  -3   4  -7 365.758 16.3084   5
  -3   4  -7 365.366 17.8922   1
   3  -4   7 403.317 15.8014   5
   3  -4   7 323.150 17.7943   1
  -4   4  -7 245.838 14.3832   1
  -4   4  -7 230.330 11.9322   5
   4  -4   7 242.047 14.4063   1
   4  -4   7 245.765 10.6393   3
   4  -4   7 210.236 10.5718   5
   4  -4   7 235.264 9.92920   5
  -5   4  -7 7.21649 3.73235   5
   5  -4   7 21.5290 5.98754   1
   5  -4   7 7.33716 1.35615   3
  -6   4  -7 114.906 9.50128   5
   6  -4   7 100.295 10.5048   1
   6  -4   7 117.639 5.33451   3
  -7   4  -7 -0.0184 0.88416   2
   7  -4   7 0.07363 0.73114   4
   7  -4   7 -0.9563 0.83086   3
  -8   4  -7 0.41755 1.03835   2
   8  -4   7 1.32979 1.07375   3
  -9   4  -7 -0.8422 1.01182   2
   9  -4   7 -0.9178 0.96215   3
  10  -4   7 58.6375 3.89995   3
  11  -4   7 0.82638 1.23096   3
  12  -4   7 236.750 10.1765   3
  13  -4   7 13.8546 1.84968   3
  14  -4   7 41.6671 2.61868   3
  14   3  -7 147.607 6.70002   3
 -14  -3   7 124.260 5.60466   2
  13   3  -7 18.6136 1.77472   3
 -13  -3   7 18.2608 1.80005   2
  12   3  -7 110.365 5.84525   3
 -12  -3   7 122.230 5.49699   2
  11   3  -7 136.433 6.51451   3
 -11  -3   7 143.039 6.37544   2
   9   3  -7 1.79303 0.99971   3
  -9  -3   7 -0.7288 0.84947   2
   8   3  -7 73.0456 4.01131   3
   8   3  -7 75.7963 6.70976   5
  -8  -3   7 77.1414 3.87398   2
   7   3  -7 23.1704 1.97838   3
   7   3  -7 27.8136 4.56583   5
  -7  -3   7 22.3257 1.87875   2
  -7  -3   7 22.5788 9.12312   1
   6   3  -7 49.1835 2.53172   2
   6   3  -7 44.3861 6.31708   1
   6   3  -7 54.8841 5.23382   5
  -6  -3   7 52.1786 2.79577   2
   5   3  -7 1020.66 38.6429   5
   5   3  -7 989.738 40.4621   1
   5   3  -7 865.650 35.4704   2
  -5  -3   7 997.369 35.6196   2
   4   3  -7 281.558 12.8832   5
   4   3  -7 255.451 13.8850   1
  -4  -3   7 249.771 10.1244   2
   3   3  -7 60.6875 5.76288   1
   3   3  -7 65.3786 4.99066   5
   2   3  -7 1314.15 51.5475   1
   2   3  -7 1307.03 50.2299   5
   1   3  -7 2.63259 2.14321   1
   1   3  -7 3.87902 1.86670   5
   0   3  -7 641.385 27.3853   1
   0   3  -7 665.664 26.4204   5
  -1   3  -7 4.71920 2.46238   1
  -1   3  -7 4.57542 1.76331   5
  -2   3  -7 72.2068 5.21765   5
  -2   3  -7 77.9769 6.32620   1
  -3   3  -7 77.1446 5.80501   5
  -3   3  -7 77.1418 7.07883   1
  -4   3  -7 254.480 16.6837   1
  -4   3  -7 228.509 11.7465   5
   4  -3   7 220.766 9.22832   3
   4  -3   7 238.307 12.2501   5
   4  -3   7 217.070 14.2193   1
  -5   3  -7 361.227 16.6196   5
  -5   3  -7 354.244 19.2774   1
   5  -3   7 341.134 19.1935   1
   5  -3   7 352.030 13.9947   5
   5  -3   7 361.081 13.7120   3
   5  -3   7 330.883 14.4847   5
   6  -3   7 71.3983 3.79367   3
  -7   3  -7 152.045 6.45206   2
   7  -3   7 155.471 6.88247   3
   8  -3   7 382.560 15.2800   3
  -9   3  -7 102.221 4.75243   2
   9  -3   7 96.2371 5.16960   3
  10  -3   7 209.072 9.27347   3
 -11   3  -7 4.33103 1.19506   2
  11  -3   7 5.26821 1.48461   3
  12  -3   7 3.12632 1.19417   3
  13  -3   7 30.7699 2.56288   3
  14  -3   7 6.49850 1.35722   3
  14   2  -7 8.07899 1.20754   3
 -14  -2   7 4.76740 0.98730   2
  13   2  -7 69.5568 3.84648   3
 -13  -2   7 72.6529 3.64418   2
  12   2  -7 68.0884 4.07694   3
 -12  -2   7 78.1876 3.91353   2
  11   2  -7 199.073 8.88980   3
 -11  -2   7 203.825 8.54650   2
  10   2  -7 0.77668 0.89232   3
 -10  -2   7 2.95571 1.05893   2
   9   2  -7 302.174 12.5015   3
  -9  -2   7 307.632 12.1608   2
   8   2  -7 311.536 13.9525   5
   8   2  -7 307.985 12.5672   3
  -8  -2   7 310.868 12.2348   2
   7   2  -7 81.9600 6.09890   5
  -7  -2   7 79.5608 3.86346   2
   6   2  -7 119.160 7.31823   5
   6   2  -7 124.903 12.4046   1
  -6  -2   7 113.569 5.05894   2
   5   2  -7 1417.87 53.8595   5
   5   2  -7 1441.70 55.8660   1
  -5  -2   7 1365.67 51.3750   2
   4   2  -7 109.406 7.67829   1
   4   2  -7 108.038 6.71820   5
   3   2  -7 146.436 7.94480   5
   3   2  -7 142.979 8.82175   1
   2   2  -7 1753.97 67.1290   1
   1   2  -7 380.849 18.1309   1
   1   2  -7 388.480 16.4824   5
   0   2  -7 8.19752 2.11651   5
   0   2  -7 9.50796 2.68394   1
  -1   2  -7 43.7777 4.61298   1
  -1   2  -7 55.9502 4.31074   5
  -2   2  -7 120.719 8.32652   1
  -2   2  -7 139.257 7.61499   5
   2  -2   7 144.974 8.40058   5
  -3   2  -7 1363.44 54.5301   1
  -3   2  -7 1388.22 53.4400   5
   3  -2   7 1434.89 53.4688   5
  -4   2  -7 3150.12 119.041   5
  -4   2  -7 3163.98 120.540   1
   4  -2   7 3309.82 118.745   5
  -5   2  -7 8.47460 1.26317   2
  -5   2  -7 8.95467 5.65748   1
   5  -2   7 11.6485 2.72710   5
   5  -2   7 8.36992 1.55426   3
  -6   2  -7 85.5514 3.77661   2
   6  -2   7 73.3104 4.04447   3
  -7   2  -7 67.0660 3.30772   2
   7  -2   7 64.8004 3.70522   3
  -8   2  -7 0.08770 0.81413   2
   8  -2   7 0.69886 0.98905   3
  -9   2  -7 18.4831 1.90332   2
   9  -2   7 18.0269 2.24587   3
  10  -2   7 6.08272 1.49721   3
 -11   2  -7 59.5508 3.37828   2
  11  -2   7 56.9519 3.78798   3
 -12   2  -7 122.640 5.53947   2
  12  -2   7 128.750 6.18290   3
  13  -2   7 52.4422 3.28768   3
  14  -2   7 2.43577 0.82944   3
  14   1  -7 9.59198 1.37206   3
 -14  -1   7 9.39996 1.65922   2
  13   1  -7 0.62600 0.84401   3
 -13  -1   7 -0.0314 0.80677   2
  12   1  -7 29.3841 2.58353   3
 -12  -1   7 30.6113 2.29737   2
  11   1  -7 20.9417 2.25415   3
 -11  -1   7 20.2673 1.97326   2
  10   1  -7 226.271 9.75794   3
 -10  -1   7 219.144 9.17598   2
   9   1  -7 198.382 8.72201   3
  -9  -1   7 196.028 8.22241   2
   8   1  -7 247.721 10.2408   3
  -8  -1   7 238.543 9.73813   2
   7   1  -7 483.703 18.9601   4
   7   1  -7 526.482 20.5220   5
  -7  -1   7 508.576 19.0947   2
   6   1  -7 101.675 6.25126   5
   6   1  -7 89.5531 7.37579   1
   6   1  -7 95.3646 4.39566   4
   5   1  -7 64.9086 3.22451   4
   5   1  -7 60.5580 5.71979   1
   5   1  -7 61.4222 4.81656   5
  -5  -1   7 60.9086 3.12650   2
   4   1  -7 22.6119 3.15512   5
   4   1  -7 20.6223 3.66368   1
   3   1  -7 2390.90 89.1820   5
   3   1  -7 2416.47 90.5344   1
   2   1  -7 3957.22 146.608   5
   2   1  -7 4043.87 147.813   1
   1   1  -7 20.2711 3.18363   1
   1   1  -7 12.7278 2.49682   5
   0   1  -7 3.16863 2.09389   1
   0   1  -7 4.21618 1.91328   5
  -1   1  -7 4.92267 2.44328   1
  -1   1  -7 6.87227 2.10108   5
  -2   1  -7 592.873 25.4184   1
  -2   1  -7 583.699 24.4392   5
   2  -1   7 609.251 24.8033   5
  -3   1  -7 1737.32 66.4802   5
  -3   1  -7 1719.30 67.3877   1
   3  -1   7 1798.02 66.7286   5
  -4   1  -7 180.676 11.5509   1
  -4   1  -7 189.601 10.7364   5
   4  -1   7 212.362 10.6242   5
   4  -1   7 190.486 7.93189   3
  -5   1  -7 1807.75 70.1709   1
   5  -1   7 1758.94 67.9171   5
  -6   1  -7 210.766 8.65401   2
  -6   1  -7 221.691 16.2509   1
   6  -1   7 216.147 11.2881   5
   6  -1   7 226.886 9.13313   3
  -7   1  -7 7.93425 1.40764   2
   7  -1   7 8.75299 1.67886   3
   7  -1   7 9.03943 3.04132   5
  -8   1  -7 700.626 26.4763   2
   8  -1   7 716.435 27.0233   3
  -9   1  -7 -0.8656 0.77431   2
   9  -1   7 -1.2381 0.96489   3
 -10   1  -7 312.998 12.4001   2
  10  -1   7 311.741 12.9703   3
 -11   1  -7 -0.5594 0.84730   2
  11  -1   7 -0.7455 0.94953   3
 -12   1  -7 123.185 5.69131   2
  12  -1   7 136.276 6.93032   3
 -13   1  -7 1.94968 0.99080   2
  13  -1   7 1.91275 1.06249   3
  14  -1   7 15.5962 1.58437   3
  14   0  -7 48.0618 2.93726   3
  13   0  -7 46.4124 3.08320   3
 -13   0   7 38.6883 2.57793   2
  12   0  -7 19.1842 2.18980   3
 -12   0   7 18.7201 1.90407   2
  11   0  -7 209.485 9.25502   3
 -11   0   7 203.615 8.58707   2
  10   0  -7 70.5353 4.28965   3
 -10   0   7 76.8390 3.90140   2
   9   0  -7 12.0241 1.39681   4
   9   0  -7 8.59372 1.82316   3
  -9   0   7 11.8400 1.61249   2
   8   0  -7 27.2661 1.90417   4
   8   0  -7 25.6040 2.32901   3
  -8   0   7 25.3936 2.08251   2
   7   0  -7 244.780 9.58942   4
  -7   0   7 240.111 9.57924   2
   6   0  -7 1194.61 43.8448   4
   6   0  -7 1252.50 47.7026   1
  -6   0   7 1147.91 43.7724   2
   5   0  -7 5021.19 180.282   5
   5   0  -7 4854.42 181.959   1
   4   0  -7 1200.09 47.6513   1
   4   0  -7 1229.85 46.4200   5
   3   0  -7 5.94180 2.15876   1
   2   0  -7 144.172 8.69412   1
   2   0  -7 165.658 8.33039   5
   1   0  -7 41.3480 4.51943   1
   1   0  -7 48.8988 4.09046   5
   0   0  -7 3678.33 135.595   1
   0   0  -7 3639.74 134.645   5
  -1   0  -7 415.871 18.2121   5
  -1   0  -7 437.084 19.2009   1
   1   0   7 414.727 18.4304   5
  -2   0  -7 2789.12 104.326   1
   2   0   7 2767.65 103.625   5
  -3   0  -7 344.395 16.6829   1
   3   0   7 334.578 15.9575   5
  -4   0  -7 3.66692 0.79679   2
  -4   0  -7 5.11505 3.38832   1
   4   0   7 1.64973 2.19320   5
   4   0   7 2.76842 1.06807   3
  -5   0  -7 48.3101 2.61674   2
  -5   0  -7 42.2252 7.44110   1
   5   0   7 47.8925 2.93715   3
   5   0   7 59.5835 5.67967   5
  -6   0  -7 105.943 11.9022   1
  -6   0  -7 105.324 4.75091   2
   6   0   7 113.013 8.29238   5
   6   0   7 108.392 5.13612   3
   7   0   7 1026.97 37.8773   3
   7   0   7 1000.62 40.6700   5
  -8   0  -7 14.5305 1.67814   2
   8   0   7 12.0426 1.89466   3
  -9   0  -7 181.734 7.60884   2
   9   0   7 176.079 8.04709   3
 -10   0  -7 122.940 5.47767   2
  10   0   7 111.777 5.85896   3
 -11   0  -7 29.6411 2.28932   2
  11   0   7 22.8115 2.56223   3
 -12   0  -7 20.0930 1.94046   2
  12   0   7 19.8792 2.31044   3
  13   0   7 11.1362 1.69139   3
  14   0   7 80.7903 3.80466   3
  14  -1  -7 28.3307 2.26290   3
  13  -1  -7 42.5474 3.06500   3
  12  -1  -7 39.8055 3.06116   3
  11  -1  -7 5.40131 1.41437   3
 -11   1   7 6.85391 1.27283   2
  10  -1  -7 198.785 8.71864   3
  10  -1  -7 179.733 7.74853   4
 -10   1   7 192.060 7.94569   2
   9  -1  -7 467.362 18.3720   4
   9  -1  -7 506.258 19.2418   3
  -9   1   7 481.255 18.4700   2
   8  -1  -7 103.211 5.20717   3
   8  -1  -7 103.827 4.77332   4
  -8   1   7 99.9474 4.65772   2
   7  -1  -7 6.16759 1.29939   4
  -7   1   7 7.38635 1.26897   2
   6  -1  -7 390.442 14.3645   4
   6  -1  -7 368.911 17.3109   1
  -6   1   7 366.527 14.2257   2
   5  -1  -7 3.01845 2.15612   1
   4  -1  -7 2.93810 1.98564   1
   4  -1  -7 5.43971 2.20898   5
   4  -1  -7 3.35207 0.88030   4
   3  -1  -7 27.8470 3.82239   5
   3  -1  -7 27.4470 3.70788   1
   2  -1  -7 1199.17 49.5368   1
   2  -1  -7 1370.65 53.1688   5
   1  -1  -7 200.513 10.6805   1
   0  -1  -7 410.924 18.9718   1
   0  -1  -7 429.505 18.5563   5
   0   1   7 429.522 18.6076   5
  -1  -1  -7 1126.43 46.0258   1
   1   1   7 1204.00 45.8631   5
  -2  -1  -7 30.2002 4.29525   1
   2   1   7 34.7179 4.38124   5
  -3  -1  -7 771.223 29.5843   2
  -3  -1  -7 827.511 33.9358   1
   3   1   7 819.054 33.4799   5
  -4  -1  -7 90.5154 4.08961   2
  -4  -1  -7 100.110 8.42698   1
   4   1   7 94.9282 7.46413   5
   4   1   7 91.3432 4.02050   2
   4   1   7 93.3277 4.62492   3
  -5  -1  -7 1151.64 42.9981   2
  -5  -1  -7 1163.35 48.4564   1
   5   1   7 1193.41 47.5967   5
   5   1   7 1183.51 43.3020   3
  -6  -1  -7 3.64904 0.97652   2
  -6  -1  -7 12.8128 6.39570   1
   6   1   7 6.16159 1.30748   3
   6   1   7 1.72539 3.08119   5
  -7  -1  -7 121.256 5.44589   2
   7   1   7 131.295 9.98598   5
   7   1   7 120.405 5.77431   3
  -8  -1  -7 79.4938 4.15834   2
   8   1   7 84.4687 8.93411   5
   8   1   7 89.0713 4.64463   3
  -9  -1  -7 1.67148 0.99335   2
   9   1   7 0.59512 1.12279   3
 -10  -1  -7 297.533 11.7225   2
  10   1   7 283.286 12.0593   3
 -11  -1  -7 4.21794 1.08559   2
  11   1   7 6.54229 1.52439   3
 -12  -1  -7 42.3712 2.69964   2
  12   1   7 44.0123 2.96913   3
  13   1   7 4.12592 0.99437   3
  14  -2  -7 31.9728 2.37006   3
  13  -2  -7 28.2595 2.48575   3
  12  -2  -7 54.1819 3.65002   3
  11  -2  -7 63.5891 3.32840   4
  11  -2  -7 67.1139 4.14314   3
  10  -2  -7 26.9656 2.13875   4
   9  -2  -7 279.719 11.1772   4
   9  -2  -7 289.764 11.9406   3
  -9   2   7 275.583 11.1997   2
   8  -2  -7 553.829 21.1821   3
   8  -2  -7 550.302 20.5342   4
  -8   2   7 524.277 20.4106   2
   7  -2  -7 65.9080 3.31073   4
  -7   2   7 63.2971 3.29043   2
   6  -2  -7 70.2010 3.46250   4
   6  -2  -7 82.2327 5.98915   1
  -6   2   7 68.0639 3.32107   2
   5  -2  -7 311.405 12.2117   4
   5  -2  -7 328.254 15.0906   1
   4  -2  -7 4762.53 175.248   1
   3  -2  -7 3265.13 121.349   1
   2  -2  -7 241.075 12.2914   1
   1  -2  -7 4838.05 174.482   1
  -1   2   7 4622.24 173.942   5
   0  -2  -7 134.552 8.69552   1
  -1  -2  -7 1182.64 46.4086   1
   1   2   7 1139.83 46.0967   5
  -2  -2  -7 1048.98 40.7905   2
  -2  -2  -7 1125.30 45.1759   1
   2   2   7 1182.75 45.1805   5
  -3  -2  -7 1408.60 57.1046   1
   3   2   7 1371.28 56.6838   5
   3   2   7 1516.73 52.8817   3
  -4  -2  -7 1270.06 53.1136   1
  -4  -2  -7 1257.13 47.8473   2
   4   2   7 1355.24 49.5872   3
   4   2   7 1357.07 52.9816   5
  -5  -2  -7 56.8785 2.95491   2
  -5  -2  -7 65.1900 7.80819   1
   5   2   7 56.4103 3.31105   3
   5   2   7 50.1277 6.69123   5
   5   2   7 58.8975 2.87831   2
  -6  -2  -7 315.695 19.7196   1
  -6  -2  -7 325.701 12.7337   2
   6   2   7 328.314 17.8489   5
   6   2   7 332.262 13.0302   3
  -7  -2  -7 178.459 7.27339   2
  -7  -2  -7 148.441 18.4351   1
   7   2   7 174.492 12.4570   5
   7   2   7 160.856 6.82253   2
   7   2   7 176.166 7.57079   3
  -8  -2  -7 16.4169 1.90765   2
   8   2   7 21.0749 2.38264   3
   8   2   7 30.2105 7.96314   5
  -9  -2  -7 80.0125 4.14545   2
   9   2   7 74.9667 4.42085   3
 -10  -2  -7 0.98461 0.96045   2
  10   2   7 0.59655 1.13660   3
 -11  -2  -7 121.099 5.67611   2
  11   2   7 127.623 7.19972   3
 -12  -2  -7 14.8900 1.73395   2
  12   2   7 16.7507 1.84735   3
 -13  -2  -7 0.22718 0.62338   2
  14  -3  -7 -0.1227 0.58894   3
[truncated: 683,411 more chars]
