# Supplementary material for: H(N3)dap (Hdap = 2,6-diaminopurine) Recognition by Cu<sub>2</sub>(EGTA): Structure, Physical Properties and DFT-Calculations of [Cu<sub>4</sub>(μ-EGTA)<sub>2</sub>(μ-H(N3)dap)<sub>2</sub>(H<sub>2</sub>O)<sub>2</sub>]·7H<sub>2</sub>O
Source: Preprints.org preprint supplement (doi:10.20944/preprints202308.0975.v1), 2023-08-14
Supplement: Supplementary file 2 [file supplementary › ESI.docx]

Supplementary Material for manuscript:

H(N3)dap (Hdap = 2,6-diaminopurine) recognition by Cu2(EGTA): Structure, physical properties and DFT-calculations of [Cu4(μ-EGTA)2(μ-H(N3)dap)2(H2O)2]·7H2O

Homa Mousavi 1, María Eugenia García-Rubiño 2, Duane Choquesillo-Lazarte 3, Alfonso Castiñeiras 4, Antonio Frontera 5 and Juan Niclós-Gutiérrez 1,*

**Table of contents:**

1. IR Figures Page 2

2. Pictures of the crystals Page 3








**Figure S1.** FT-IR spectra of the binary compound [Cu2(µ-EGTA)(H2O)2]·2H2O (up) and the novel ternary compound **1** [Cu4(µ-EGTA)2(µ-Hdap)2(H2O)2]·7H2O (down).


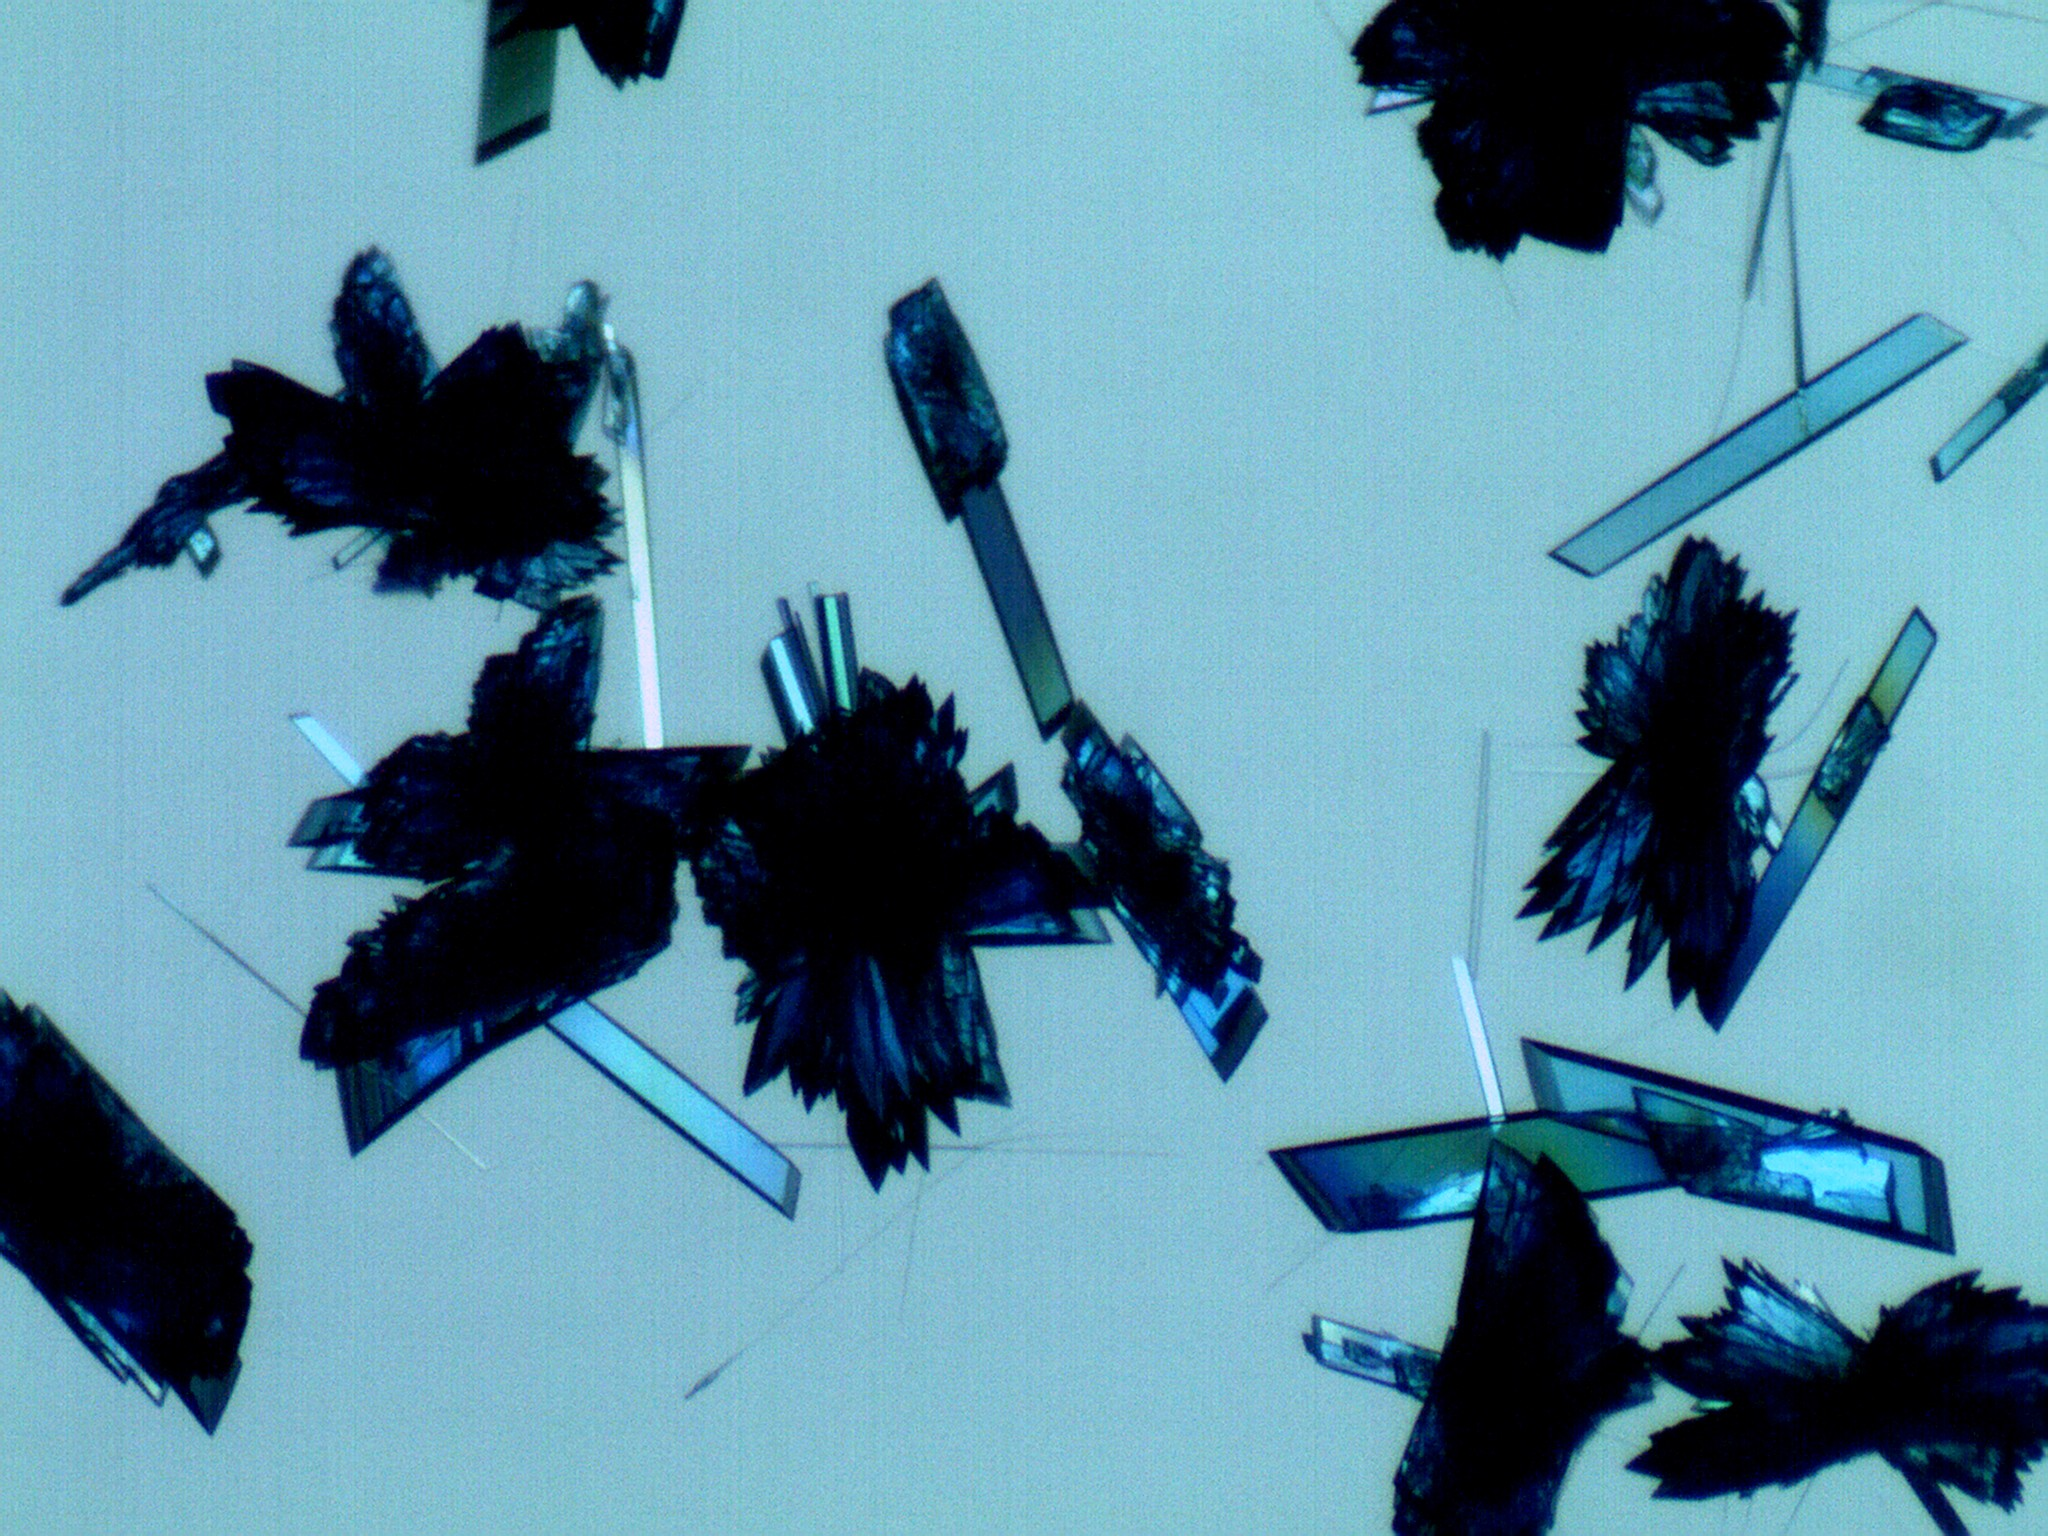

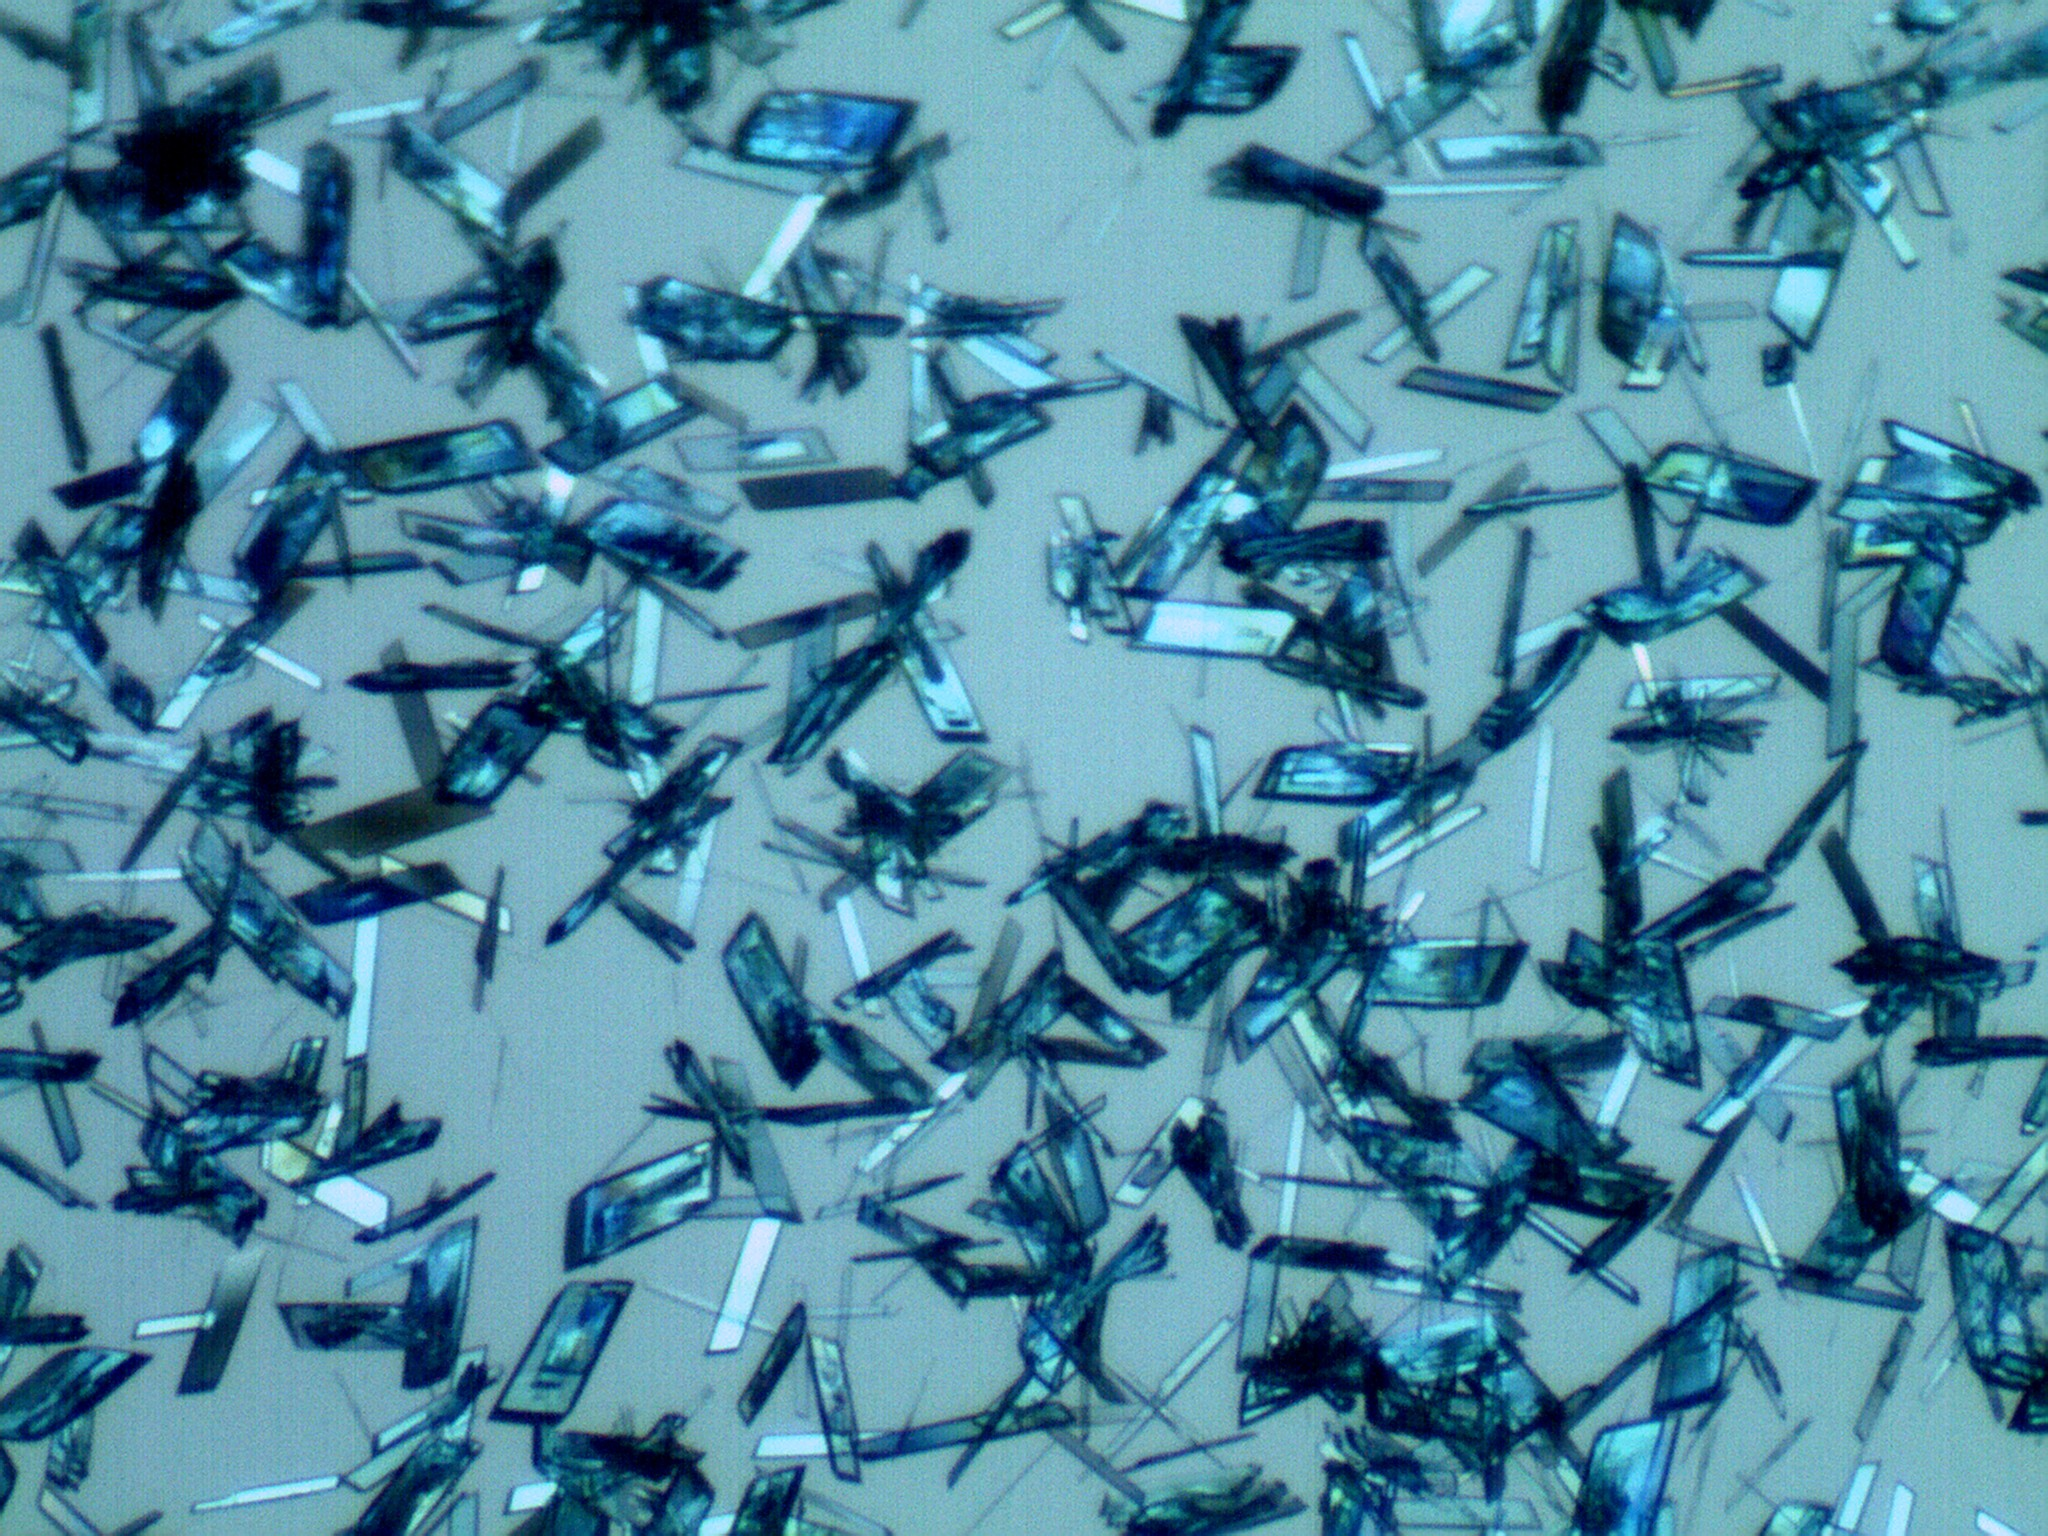


**Figure S2**. Photos of crystals of [Cu4(µ-EGTA)2(µ-Hdap)2(H2O)2]·7H2O (**1**).
